# Supplementary material
Source: publisher site journal article supplement (https://www.spandidos-publications.com/3650/downloadSupplementary)
Supplement: Supplementary file 1 [file downloadSupplementary]

## Sheet: all.protein
Table SII. Identification of total proteins of granulation tissues before and after negative-pressure wound therapy for 1 week (unique peptides ≥2, protein FDR ≤0.01).
Accession no.	Gene name	Description	Coverage	Number of peptides	Number of PSMs	Number of unique peptides	Number of protein groups	Number of AAs	MW, kDa	calc. pI	Score SEQUEST HT	Number of peptides by Search Engine (SEQUEST HT)	Number of razor peptides	Patient 1		Patient 2		Patient 3
														Before	After	Before	After	Before	After
P02768	ALB	Serum albumin OS=Homo sapiens OX=9606 GN=ALB PE=1 SV=2	88	75	1898	2	1	609	69.3	6.28	7044.05	75	76	31001303057	32512312426	46355187175	37385874210	38094871198	23508250467
P02675	FGB	Fibrinogen beta chain OS=Homo sapiens OX=9606 GN=FGB PE=1 SV=2	74	51	1587	51	1	491	55.9	8.27	5822.66	51	0	21616395611	3364158154	22739630737	12137684142	1338880224	13567063991
A0A024R1N1	MYH9	Myosin, heavy polypeptide 9, non-muscle, isoform CRA_a OS=Homo sapiens OX=9606 GN=MYH9 PE=3 SV=1	62	150	1170	126	1	1960	226.4	5.6	4390.42	150	25	1489005417	3113739271	1365702783	1902285630	2558168862	1845244883
D9ZGF2	COL6A3	Collagen, type VI, alpha 3 OS=Homo sapiens OX=9606 GN=COL6A3 PE=2 SV=1	49	147	1165	68	1	3177	343.5	6.68	3868.95	147	80	8.63276e+08	5195933872	1754077680	2608925250	10508719436	4864904401
A0A286YEY4	IGHG2	Immunoglobulin heavy constant gamma 2 (Fragment) OS=Homo sapiens OX=9606 GN=IGHG2 PE=1 SV=1	47	19	896	8	1	395	43.8	6.52	3114.65	19	7	2153683323	2508209724	4074703744	2924178881	1223207093	1182764554
P21333	FLNA	Filamin-A OS=Homo sapiens OX=9606 GN=FLNA PE=1 SV=4	56	114	798	109	1	2647	280.6	6.06	2906.41	114	5	5.81229e+08	1789302500	6.38427e+08	8.99135e+08	2105599426	1098963738
P01024	C3	Complement C3 OS=Homo sapiens OX=9606 GN=C3 PE=1 SV=2	60	96	796	96	1	1663	187	6.4	2760.51	96	0	7.34173e+08	1073345409	1482659702	1370330963	7.21806e+08	7.18346e+08
Q53H26	#N/A	Transferrin variant (Fragment) OS=Homo sapiens OX=9606 PE=2 SV=1	67	61	758	4	1	698	77	7.03	2752.85	61	0	9.02255e+07	160061544	5.42527e+07	8.28342e+07	8.57383e+07	1.5624e+07
A0A024R462	FN1	Fibronectin 1, isoform CRA_n OS=Homo sapiens OX=9606 GN=FN1 PE=4 SV=1	52	88	749	82	1	2355	259	5.73	2724.45	88	5	1145506259	1978007432	1852712255	1291649505	1845697442	1439817505
P02671	FGA	Fibrinogen alpha chain OS=Homo sapiens OX=9606 GN=FGA PE=1 SV=2	45	45	804	45	1	866	94.9	6.01	2677.83	45	0	13647614866	2746666100	9927124828	8010559253	8.45826e+08	7012190942
P02679	FGG	Fibrinogen gamma chain OS=Homo sapiens OX=9606 GN=FGG PE=1 SV=3	68	35	681	3	1	453	51.5	5.62	2565.26	35	39	19101936963	3599702203	16353481057	8604137607	1414886310	10487383895
B4E1B2	#N/A	cDNA FLJ53691, highly similar to Serotransferrin OS=Homo sapiens OX=9606 PE=2 SV=1	67	61	715	4	1	678	74.8	7.12	2552.54	61	64	1385655484	1711699564	4355781843	3063752057	2175416462	1367204812
P08670	VIM	Vimentin OS=Homo sapiens OX=9606 GN=VIM PE=1 SV=4	88	63	733	58	1	466	53.6	5.12	2469.07	63	5	2597136761	8948718935	4056791261	3478311947	7211583288	4193499657
Q6N030	DKFZp686I15212	Uncharacterized protein OS=Homo sapiens OX=9606 GN=DKFZp686I15212 PE=1 SV=1	38	18	727	7	1	518	57	8.05	2454.73	18	0	6.01535e+08	612408775	1149714255	6.65205e+08	2.6359e+08	3.65786e+08
C8C504	HBB	Beta-globin OS=Homo sapiens OX=9606 GN=HBB PE=3 SV=1	90	18	643	2	1	147	16	8.06	2370.14	18	16	18549644608	34749551663	9930979016	21917627046	18186427448	28144120380
P60709	ACTB	Actin, cytoplasmic 1 OS=Homo sapiens OX=9606 GN=ACTB PE=1 SV=1	74	31	675	2	1	375	41.7	5.48	2334.79	31	20	1669495600	3669948457	2015106913	3506679787	3124157083	2224842206
W8QEY1	#N/A	Lactoferrin OS=Homo sapiens OX=9606 PE=2 SV=1	79	66	664	4	1	711	78.3	8.18	2312.76	66	0	8.9607e+07	1.54801e+07	1.17547e+08	9.61198e+07	1.35319e+08	4.80317e+07
A0A161I202	LTF	Lactoferrin OS=Homo sapiens OX=9606 GN=LTF PE=2 SV=1	79	66	664	4	1	711	78.3	8.18	2300.35	66	64	6044561384	3.76401e+08	2537057774	2929845096	3077062564	1017006298
Q9UK54	HBB	Hemoglobin beta subunit variant (Fragment) OS=Homo sapiens OX=9606 GN=HBB PE=2 SV=1	95	15	621	2	1	128	14	6.95	2280.01	15	2	9.69681e+08	2760935811	4.00586e+08	1040634594	1822735738	9.41129e+08
A0A024RAB6	HSPG2	Heparan sulfate proteoglycan 2 (Perlecan), isoform CRA_b OS=Homo sapiens OX=9606 GN=HSPG2 PE=4 SV=1	46	125	648	66	1	4346	463.7	6.51	2276.4	125	56	2.20424e+08	9.33837e+08	2.83849e+08	5.12496e+08	1190044102	5.75836e+08
P01023	A2M	Alpha-2-macroglobulin OS=Homo sapiens OX=9606 GN=A2M PE=1 SV=3	51	57	585	51	1	1474	163.2	6.46	2040.16	57	7	6.49789e+08	8.65038e+08	9.76178e+08	7.75927e+08	4.28063e+08	1023936616
Q15149	PLEC	Plectin OS=Homo sapiens OX=9606 GN=PLEC PE=1 SV=3	47	188	626	187	1	4684	531.5	5.96	1922.88	188	1	2.02592e+08	8.687e+08	2.60507e+08	3.60576e+08	6.16193e+08	3.80845e+08
Q09666	AHNAK	Neuroblast differentiation-associated protein AHNAK OS=Homo sapiens OX=9606 GN=AHNAK PE=1 SV=2	57	164	572	164	1	5890	628.7	6.15	1732.2	164	0	319758035	6.39142e+08	2.71952e+08	2.78913e+08	5.34816e+08	2.63333e+08
Q6PIL8	IGK@	IGK@ protein OS=Homo sapiens OX=9606 GN=IGK@ PE=1 SV=1	62	13	405	2	1	236	25.8	6.55	1591.95	13	11	1295958921	2154939231	4669162544	3221153906	1850811360	1608087379
C0JYY2	APOB	Apolipoprotein B (Including Ag(X) antigen), isoform CRA_a OS=Homo sapiens OX=9606 GN=APOB PE=4 SV=1	35	136	511	136	1	4563	515.2	7.05	1551.64	136	0	3.44877e+08	5.44075e+08	2.3412e+08	3.00974e+08	7.27785e+07	1.81259e+08
Q6P5S8	IGK@	IGK@ protein OS=Homo sapiens OX=9606 GN=IGK@ PE=1 SV=1	53	12	395	2	1	236	25.8	6.33	1537.46	12	1	2.04945e+07	4.14924e+07	9.50864e+07	8.50033e+07	3.35652e+07	1.98191e+07
A5PL27	CP	CP protein OS=Homo sapiens OX=9606 GN=CP PE=2 SV=1	48	39	383	39	1	1065	122.1	5.72	1494.51	39	0	3.04181e+08	2.73858e+08	6.84508e+08	716306023	321252902	3.89082e+08
P68032	ACTC1	Actin, alpha cardiac muscle 1 OS=Homo sapiens OX=9606 GN=ACTC1 PE=1 SV=1	73	31	497	2	1	377	42	5.39	1487.39	31	37	3392638269	5187824899	2261202324	3280856115	4032922501	2974183693
P01009	SERPINA1	Alpha-1-antitrypsin OS=Homo sapiens OX=9606 GN=SERPINA1 PE=1 SV=3	62	32	400	32	1	418	46.7	5.59	1476.28	32	0	6.68472e+08	1928599932	2491393729	2891370379	3005995815	6.86071e+08
A0A1S5UZ07	TLN1	Talin-1 OS=Homo sapiens OX=9606 GN=TLN1 PE=2 SV=1	46	88	401	82	1	2558	271.3	6.11	1436.49	88	7	1.45209e+08	4.97647e+08	1.19049e+08	2.23545e+08	4.45355e+08	2.17077e+08
A0A024R694	ACTN1	Actinin, alpha 1, isoform CRA_a OS=Homo sapiens OX=9606 GN=ACTN1 PE=2 SV=1	68	59	415	35	1	892	103	5.41	1435.06	59	22	3.30054e+08	5.37656e+08	2.17027e+08	3.15728e+08	5.97411e+08	3.6375e+08
P02042	HBD	Hemoglobin subunit delta OS=Homo sapiens OX=9606 GN=HBD PE=1 SV=2	90	17	390	9	1	147	16	8.05	1427.12	17	2	5.88626e+08	1205255345	2.53505e+08	6.22072e+08	6.05864e+08	705381798
P05164	MPO	Myeloperoxidase OS=Homo sapiens OX=9606 GN=MPO PE=1 SV=1	54	45	436	35	1	745	83.8	8.97	1402.71	45	11	2168376786	1.34415e+08	6.94914e+08	1182462721	1332176265	8.10022e+08
P00747	PLG	Plasminogen OS=Homo sapiens OX=9606 GN=PLG PE=1 SV=2	70	47	393	47	1	810	90.5	7.24	1384.03	47	0	4.011e+08	2.72694e+08	7.31503e+08	643363201	130119245	5.59924e+08
P00738	HP	Haptoglobin OS=Homo sapiens OX=9606 GN=HP PE=1 SV=1	55	25	389	11	1	406	45.2	6.58	1360.51	25	14	1566245193	1009656747	1360489362	2279828558	2199093763	1950472047
D2JYH4	ACTA2	Actin, alpha 2, smooth muscle, aorta OS=Homo sapiens OX=9606 GN=ACTA2 PE=3 SV=1	73	30	461	2	1	377	42	5.39	1359.55	30	0	NA	5.11771e+06	2.04646e+06	NA	5.44899e+06	3.05073e+06
A0A024R962	hCG_40889	HCG40889, isoform CRA_b OS=Homo sapiens OX=9606 GN=hCG_40889 PE=1 SV=1	63	60	394	3	1	1231	139	6.62	1357.67	60	58	3.0357e+08	4.77469e+08	5.80646e+08	4.79533e+08	5.21135e+08	4.37018e+08
P12109	COL6A1	Collagen alpha-1(VI) chain OS=Homo sapiens OX=9606 GN=COL6A1 PE=1 SV=3	46	39	396	39	1	1028	108.5	5.43	1339.52	39	0	2.86084e+08	1542296477	5.26154e+08	7.87052e+08	3652648442	1959606275
Q8IZI0	HBB	Hemoglobin beta chain variant Hb-I_Toulouse (Fragment) OS=Homo sapiens OX=9606 GN=HBB PE=3 SV=1	86	10	385	2	1	105	11.5	5.71	1324.11	10	0	2.88754e+06	1.23685e+06	5.68591e+06	7.54708e+06	5.00819e+06	3.7201e+07
Q99715	COL12A1	Collagen alpha-1(XII) chain OS=Homo sapiens OX=9606 GN=COL12A1 PE=1 SV=2	44	115	418	115	1	3063	332.9	5.53	1306.68	115	0	8.23278e+07	1597163352	2.42573e+08	4.17688e+08	8.97385e+08	273373237
A0A0S2Z3G9	ACTN4	Actinin alpha 4 isoform 1 (Fragment) OS=Homo sapiens OX=9606 GN=ACTN4 PE=2 SV=1	69	59	377	35	1	911	104.8	5.44	1293.16	59	0	1.05136e+08	2.06316e+08	7.2064e+07	9.66891e+07	2.07702e+08	1.14303e+08
A0A384NYT8	#N/A	Epididymis secretory sperm binding protein (Fragment) OS=Homo sapiens OX=9606 PE=2 SV=1	73	28	389	6	1	442	49.4	4.89	1284.65	28	2	1.91505e+07	1.70386e+08	4.21555e+07	7.53073e+07	9.78533e+07	5.03202e+07
A0A024R884	TNC	Tenascin C (Hexabrachion), isoform CRA_a OS=Homo sapiens OX=9606 GN=TNC PE=4 SV=1	41	73	366	6	1	2201	240.8	4.92	1247.98	73	65	3.98737e+07	5.10623e+08	2.7961e+08	2.59149e+08	1601484895	5.51685e+08
P0C0L5	C4B	Complement C4-B OS=Homo sapiens OX=9606 GN=C4B PE=1 SV=2	43	60	352	5	1	1744	192.6	7.27	1139.07	60	53	2.33566e+08	3.55139e+08	2.18128e+08	2.67843e+08	260874269	3.46031e+08
A0A384MDM4	#N/A	Epididymis secretory sperm binding protein OS=Homo sapiens OX=9606 PE=2 SV=1	39	76	356	76	1	2871	312	4.93	1133.91	76	0	3.37649e+07	2.12645e+08	7.1748e+07	1.66871e+08	9.44766e+08	5.13676e+08
Q15063	POSTN	Periostin OS=Homo sapiens OX=9606 GN=POSTN PE=1 SV=2	50	41	312	3	1	836	93.3	7.53	1130.04	41	40	1.57658e+08	7.09893e+08	2.49526e+08	4.94731e+08	8.21064e+08	4.32583e+08
A0A140TA32	C4A	Complement C4-A OS=Homo sapiens OX=9606 GN=C4A PE=1 SV=1	41	57	344	2	1	1698	187.6	7.12	1115.74	57	0	3.51852e+06	6.8766e+06	5.23225e+06	6.78902e+06	8.26044e+06	7.8331e+06
Q13885	TUBB2A	Tubulin beta-2A chain OS=Homo sapiens OX=9606 GN=TUBB2A PE=1 SV=1	57	24	330	2	1	445	49.9	4.89	1103.49	24	1	236655	4.13938e+06	2.13505e+06	1.63368e+06	5.61439e+06	2.7855e+06
A0A384MDP3	#N/A	Epididymis secretory sperm binding protein OS=Homo sapiens OX=9606 PE=2 SV=1	31	35	270	19	1	1019	108.5	6.21	1099.52	35	14	2.72954e+08	1259237044	4.38394e+08	5.56069e+08	3071990141	1204483731
P04350	TUBB4A	Tubulin beta-4A chain OS=Homo sapiens OX=9606 GN=TUBB4A PE=1 SV=2	66	25	332	2	1	444	49.6	4.88	1071.08	25	2	929067	6.55668e+06	2.52607e+06	2.77214e+06	4.71723e+06	4.80714e+06
Q8N5F4	IGL@	IGL@ protein OS=Homo sapiens OX=9606 GN=IGL@ PE=1 SV=1	42	10	314	2	1	233	24.9	5.34	1020.34	10	8	1360910908	1860245258	4494041767	3164909355	1050918232	1464645360
V9HWB4	HEL-S-89n	Epididymis secretory sperm binding protein Li 89n OS=Homo sapiens OX=9606 GN=HEL-S-89n PE=2 SV=1	52	36	297	34	1	654	72.3	5.16	1000.77	36	2	2.11128e+08	5.97646e+08	2.30113e+08	3.6314e+08	4.35016e+08	2.43366e+08
A0A384MQX1	#N/A	Epididymis secretory sperm binding protein OS=Homo sapiens OX=9606 PE=2 SV=1	65	49	290	7	1	664	74.1	7.02	966.73	49	43	2.49725e+08	1614644093	4.81462e+08	6.56003e+08	1604564222	549128996
A0A286YFJ8	IGHG4	Immunoglobulin heavy constant gamma 4 (Fragment) OS=Homo sapiens OX=9606 GN=IGHG4 PE=1 SV=1	47	15	274	7	1	396	43.8	6.24	964.24	15	0	4.95061e+07	138654400	126781793	1.00378e+08	4.0834e+07	2.55609e+07
S6B294	#N/A	IgG L chain OS=Homo sapiens OX=9606 PE=2 SV=1	37	5	253	2	1	185	20.1	8.72	956.64	5	0	NA	NA	6.60921e+06	4.41004e+06	NA	NA
P06733	ENO1	Alpha-enolase OS=Homo sapiens OX=9606 GN=ENO1 PE=1 SV=2	72	33	262	30	1	434	47.1	7.39	955.17	33	3	5.81529e+08	5.81421e+08	430344484	4.28152e+08	1086663827	511907665
P02647	APOA1	Apolipoprotein A-I OS=Homo sapiens OX=9606 GN=APOA1 PE=1 SV=1	73	32	282	32	1	267	30.8	5.76	907.3	32	0	1262367267	1680670277	2570751876	1981161367	4.94276e+08	8.38605e+08
D9IWP9	#N/A	Beta-2-glycoprotein I (Fragment) OS=Homo sapiens OX=9606 PE=2 SV=1	62	19	240	19	1	326	36.2	8	884.33	19	0	1.23728e+08	2.52716e+08	2.07437e+08	2.36327e+08	2.37635e+08	2.78527e+08
V9HWB8	HEL-S-30	Pyruvate kinase OS=Homo sapiens OX=9606 GN=HEL-S-30 PE=2 SV=1	68	33	221	3	1	531	57.9	7.84	876.26	33	31	2.53744e+08	5.06139e+08	2.8499e+08	2.86959e+08	6.6765e+08	2.47343e+08
A0A2R8YEA7	ACTB	Actin, cytoplasmic 1 (Fragment) OS=Homo sapiens OX=9606 GN=ACTB PE=1 SV=1	79	10	254	2	1	157	17.5	4.73	850.17	10	0	423668	781910	92399.4	644675	1.17689e+07	662268
W8QEH3	LMNA	Lamin A/C OS=Homo sapiens OX=9606 GN=LMNA PE=3 SV=1	61	44	258	2	1	572	65.1	6.84	848.4	44	0	NA	2.03227e+07	1.30742e+06	4.46345e+06	1.87675e+06	NA
A0A024R8S5	P4HB	Protein disulfide-isomerase OS=Homo sapiens OX=9606 GN=P4HB PE=2 SV=1	56	32	244	32	1	508	57.1	4.87	840.98	32	0	2.3164e+08	454407229	2.38635e+08	2.5963e+08	3.55858e+08	2.00703e+08
P35749	MYH11	Myosin-11 OS=Homo sapiens OX=9606 GN=MYH11 PE=1 SV=3	35	65	219	49	1	1972	227.2	5.5	821.5	65	3	1.68112e+06	4.45659e+07	3.99723e+06	8.56133e+06	2.33718e+08	9.6764e+07
A0A087WVQ6	CLTC	Clathrin heavy chain OS=Homo sapiens OX=9606 GN=CLTC PE=1 SV=1	37	57	246	57	1	1679	191.9	5.69	818.65	57	0	8.26593e+07	264002973	1.13796e+08	1.71741e+08	1.52275e+08	1.55107e+08
P04406	GAPDH	Glyceraldehyde-3-phosphate dehydrogenase OS=Homo sapiens OX=9606 GN=GAPDH PE=1 SV=3	73	23	236	23	1	335	36	8.46	794.33	23	0	6.78389e+08	1041017176	6.11053e+08	5.37287e+08	1298033378	5.23009e+08
Q6PIK1	IGL@	IGL@ protein OS=Homo sapiens OX=9606 GN=IGL@ PE=1 SV=1	39	7	215	2	1	235	24.8	7.71	792.38	7	2	6.13035e+07	8.43009e+07	121978936	1.01196e+08	1.2985e+07	1.55839e+07
P26038	MSN	Moesin OS=Homo sapiens OX=9606 GN=MSN PE=1 SV=3	61	41	249	31	1	577	67.8	6.4	782.29	41	10	3.68283e+08	3.7296e+08	2.32219e+08	2.19545e+08	5.1823e+08	257864066
P35580	MYH10	Myosin-10 OS=Homo sapiens OX=9606 GN=MYH10 PE=1 SV=3	24	44	220	21	1	1976	228.9	5.54	780.14	44	0	5.42061e+06	4.32476e+07	8.49918e+06	1.57459e+07	4.38922e+07	17254542
B2RBD5	#N/A	Tubulin beta chain OS=Homo sapiens OX=9606 PE=2 SV=1	42	19	234	3	1	450	50.4	4.93	771.08	19	1	NA	3.08053e+06	NA	NA	41073.7	NA
P13796	LCP1	Plastin-2 OS=Homo sapiens OX=9606 GN=LCP1 PE=1 SV=6	58	32	228	27	1	627	70.2	5.43	764.46	32	6	4.06325e+08	1.32223e+08	2.21323e+08	1.32494e+08	3.77766e+08	2.38428e+08
P07355	ANXA2	Annexin A2 OS=Homo sapiens OX=9606 GN=ANXA2 PE=1 SV=2	64	26	215	26	1	339	38.6	7.75	763.31	26	0	1.30849e+08	1107222981	3.66769e+08	4.64478e+08	9.41716e+08	4.82753e+08
Q15582	TGFBI	Transforming growth factor-beta-induced protein ig-h3 OS=Homo sapiens OX=9606 GN=TGFBI PE=1 SV=1	51	29	226	29	1	683	74.6	7.71	759.31	29	0	8.25323e+07	3.65114e+08	214930214	1.81222e+08	5.27391e+08	334436489
P11047	LAMC1	Laminin subunit gamma-1 OS=Homo sapiens OX=9606 GN=LAMC1 PE=1 SV=3	36	46	219	46	1	1609	177.5	5.12	757.92	46	0	2.72098e+07	2.83105e+08	4.24688e+07	1.45269e+08	3.57707e+08	1.9538e+08
P02790	HPX	Hemopexin OS=Homo sapiens OX=9606 GN=HPX PE=1 SV=2	59	24	202	24	1	462	51.6	7.02	730.54	24	0	3.39662e+08	4.36726e+08	4.10584e+08	3.55366e+08	241959949	254273869
S6C4R7	#N/A	IgG L chain OS=Homo sapiens OX=9606 PE=2 SV=1	31	5	222	2	1	212	22.5	8.24	725.51	5	0	7.64582e+06	9.25792e+06	2.53329e+07	16517060	3.81601e+06	4.6076e+06
H6VRG1	KRT1	Keratin 1 OS=Homo sapiens OX=9606 GN=KRT1 PE=3 SV=1	52	33	201	29	1	645	66.1	8.12	715.03	33	2	2.31589e+08	1.48723e+08	1.02899e+08	181044214	2.05046e+08	4.95167e+08
D3DTX7	COL1A1	Collagen, type I, alpha 1, isoform CRA_a OS=Homo sapiens OX=9606 GN=COL1A1 PE=4 SV=1	43	29	196	2	1	885	84.7	6.24	714.99	29	0	6.19949e+08	2177717172	5.85404e+08	1289679986	3850201458	9.24784e+08
A7BI36	RRBP1	p180/ribosome receptor OS=Homo sapiens OX=9606 GN=RRBP1 PE=2 SV=2	37	47	190	3	1	1540	165.6	8.97	706.63	47	42	4.92373e+07	2.63144e+08	9.75932e+07	7.57743e+07	1.57619e+08	6.70371e+07
P67936	TPM4	Tropomyosin alpha-4 chain OS=Homo sapiens OX=9606 GN=TPM4 PE=1 SV=3	79	32	198	9	1	248	28.5	4.69	688.57	32	22	1.43809e+08	7.48536e+08	2.33658e+08	3.01199e+08	1063386199	3.45368e+08
P06727	APOA4	Apolipoprotein A-IV OS=Homo sapiens OX=9606 GN=APOA4 PE=1 SV=3	65	30	211	30	1	396	45.4	5.38	686.44	30	0	2.02384e+08	3.12792e+08	3.27936e+08	3.61176e+08	2.07308e+08	2.60476e+08
P68366	TUBA4A	Tubulin alpha-4A chain OS=Homo sapiens OX=9606 GN=TUBA4A PE=1 SV=1	54	20	201	6	1	448	49.9	5.06	681.89	20	0	9.62868e+06	6.91205e+07	2.04962e+07	5.7627e+07	2.37149e+07	3.40162e+07
P02452	COL1A1	Collagen alpha-1(I) chain OS=Homo sapiens OX=9606 GN=COL1A1 PE=1 SV=5	32	34	198	7	1	1464	138.9	5.8	679.32	34	27	1.02444e+08	6.9892e+08	2.07618e+08	2.17021e+08	8.53133e+08	303572487
F5H5D3	TUBA1C	Tubulin alpha chain OS=Homo sapiens OX=9606 GN=TUBA1C PE=1 SV=1	46	20	205	2	1	519	57.7	5.07	672.47	20	19	1.70809e+08	7.09615e+08	2.34335e+08	3.16788e+08	2.95947e+08	2.4988e+08
A6NLG9	#N/A	Biglycan OS=Homo sapiens OX=9606 PE=2 SV=1	71	23	191	23	1	307	34.9	8.87	661.09	23	0	4.80377e+07	5.05365e+08	6.76552e+07	1.63288e+08	1477059844	9.16426e+08
A0A1B0GUU9	IGHM	Immunoglobulin heavy constant mu (Fragment) OS=Homo sapiens OX=9606 GN=IGHM PE=1 SV=1	42	18	196	3	1	474	51.9	6.15	646.31	18	14	1.97466e+08	4.17085e+08	4.21842e+08	4.24491e+08	1.49293e+08	1.63809e+08
P18206	VCL	Vinculin OS=Homo sapiens OX=9606 GN=VCL PE=1 SV=4	49	45	190	45	1	1134	123.7	5.66	637.92	45	0	9.77784e+07	256057808	9.31537e+07	1.1771e+08	3.54058e+08	1.96705e+08
A0A384N669	#N/A	Epididymis secretory sperm binding protein OS=Homo sapiens OX=9606 PE=2 SV=1	41	16	221	16	1	338	38.4	6.61	632.36	16	0	1.39729e+08	1169287600	3.04516e+08	3.61603e+08	3270915445	9.72669e+08
D6RF35	GC	Vitamin D-binding protein OS=Homo sapiens OX=9606 GN=GC PE=1 SV=1	51	23	171	23	1	476	53	5.52	609.76	23	0	1.35594e+08	1.66241e+08	2.5881e+08	2.08166e+08	2.55542e+08	2.93441e+08
P02549	SPTA1	Spectrin alpha chain, erythrocytic 1 OS=Homo sapiens OX=9606 GN=SPTA1 PE=1 SV=5	37	64	174	64	1	2419	279.8	5.05	608.4	64	0	8.1016e+07	1.39877e+08	6.95112e+06	117203738	3.30727e+07	110610000
Q53HM9	#N/A	Elongation factor 1-alpha (Fragment) OS=Homo sapiens OX=9606 PE=2 SV=1	40	18	169	18	1	462	50.1	8.87	602.8	18	0	9.02041e+07	5.96386e+08	1.64763e+08	2.42315e+08	3.02459e+08	1.82163e+08
A0A384MEF1	#N/A	Epididymis secretory sperm binding protein OS=Homo sapiens OX=9606 PE=2 SV=1	40	22	165	18	1	782	85.6	6.28	598.41	22	4	3.57105e+08	2.37353e+08	1.84202e+08	2.53956e+08	3.94054e+08	2.53198e+08
A0A0S2Z428	KRT6A	HCG2039812, isoform CRA_b (Fragment) OS=Homo sapiens OX=9606 GN=KRT6A PE=2 SV=1	59	41	182	3	1	564	60	8	593.93	41	38	4.85484e+07	4.12131e+07	2.01205e+07	9.95245e+08	5.15053e+08	2516338213
P14780	MMP9	Matrix metalloproteinase-9 OS=Homo sapiens OX=9606 GN=MMP9 PE=1 SV=3	41	25	183	5	1	707	78.4	6.06	589.5	25	20	5.57518e+08	4.87985e+07	1.64864e+08	1.45156e+08	2.25514e+08	1.91696e+08
V9HWF4	HEL-S-68p	Phosphoglycerate kinase OS=Homo sapiens OX=9606 GN=HEL-S-68p PE=2 SV=1	62	21	165	21	1	417	44.6	8.1	588.01	21	0	1.49838e+08	2.15869e+08	1.83283e+08	1.48949e+08	4.8091e+08	1.72087e+08
V9HW25	HEL-S-273	Epididymis secretory protein Li 273 OS=Homo sapiens OX=9606 GN=HEL-S-273 PE=2 SV=1	63	30	171	15	1	284	33	4.67	587.33	30	4	2.04014e+07	1.41399e+08	4.05136e+07	3.67419e+07	2.68476e+08	7.0591e+07
B7Z507	#N/A	cDNA FLJ51036, highly similar to Matrix metalloproteinase-9 (EC3.4.24.35) OS=Homo sapiens OX=9606 PE=2 SV=1	39	23	175	3	1	648	71.5	5.86	578.69	23	0	79833.2	NA	1.65119e+07	1.45282e+07	1.19076e+07	1.04532e+07
P29401	TKT	Transketolase OS=Homo sapiens OX=9606 GN=TKT PE=1 SV=3	45	22	166	22	1	623	67.8	7.66	577.78	22	0	2.43382e+08	1.02445e+08	1.18906e+08	1.10583e+08	2.46451e+08	124768826
V9HVY3	HEL-S-269	Protein disulfide-isomerase OS=Homo sapiens OX=9606 GN=HEL-S-269 PE=2 SV=1	64	30	187	24	1	505	56.7	6.35	576.61	30	6	1.27056e+08	3.81827e+08	1.50306e+08	216844954	3.1285e+08	1.6791e+08
P04259	KRT6B	Keratin, type II cytoskeletal 6B OS=Homo sapiens OX=9606 GN=KRT6B PE=1 SV=5	59	39	174	2	1	564	60	8	568.76	39	1	1.90117e+07	1.69946e+07	1.61174e+07	48255668	4.8683e+07	1.47428e+08
P07585	DCN	Decorin OS=Homo sapiens OX=9606 GN=DCN PE=1 SV=1	50	22	166	22	1	359	39.7	8.54	567.21	22	0	6.90083e+07	624630683	1.69342e+08	1.74951e+08	2517697616	8.48786e+08
A0A024RBH2	CKAP4	Cytoskeleton-associated protein 4, isoform CRA_c OS=Homo sapiens OX=9606 GN=CKAP4 PE=4 SV=1	64	31	155	31	1	602	66	5.92	558.47	31	0	5.92228e+07	3.11981e+08	1.03042e+08	1.21819e+08	1.26337e+08	8.10285e+07
B2R853	#N/A	cDNA, FLJ93744, highly similar to Homo sapiens keratin 6E (KRT6E), mRNA OS=Homo sapiens OX=9606 PE=2 SV=1	60	40	169	4	1	564	60	7.72	556.11	40	3	247478	408303	NA	1.50307e+07	9.23323e+06	4.57876e+07
P04083	ANXA1	Annexin A1 OS=Homo sapiens OX=9606 GN=ANXA1 PE=1 SV=2	65	22	155	22	1	346	38.7	7.02	555.31	22	0	4.82908e+08	2.88689e+08	2.35156e+08	2.99807e+08	6.05066e+08	3.96322e+08
Q13813	SPTAN1	Spectrin alpha chain, non-erythrocytic 1 OS=Homo sapiens OX=9606 GN=SPTAN1 PE=1 SV=3	37	66	159	66	1	2472	284.4	5.35	551.48	66	0	5.99299e+07	1.00062e+08	3.38346e+07	48028981	1.33742e+08	5.36887e+07
P11215	ITGAM	Integrin alpha-M OS=Homo sapiens OX=9606 GN=ITGAM PE=1 SV=2	34	32	169	31	1	1152	127.1	7.23	547.84	32	1	3.40959e+08	2.29095e+07	9.67177e+07	1.51903e+08	1.0998e+08	1.45065e+08
Q9BUF5	TUBB6	Tubulin beta-6 chain OS=Homo sapiens OX=9606 GN=TUBB6 PE=1 SV=1	50	19	182	8	1	446	49.8	4.88	546.18	19	0	1.3963e+06	1.83368e+07	2.64248e+06	3.55597e+06	1.31059e+07	7.42694e+06
V9HWN7	HEL-S-87p	Fructose-bisphosphate aldolase OS=Homo sapiens OX=9606 GN=HEL-S-87p PE=2 SV=1	73	19	138	18	1	364	39.4	8.09	542.74	19	1	2.77386e+08	3.04249e+08	2.24464e+08	1.93484e+08	6.0029e+08	2.62575e+08
P00734	F2	Prothrombin OS=Homo sapiens OX=9606 GN=F2 PE=1 SV=2	55	26	152	26	1	622	70	5.9	536.4	26	0	1.46162e+08	1.16636e+08	194959996	2.10551e+08	4.96796e+07	1.67465e+08
V9HW88	HEL-S-99n	Calreticulin, isoform CRA_b OS=Homo sapiens OX=9606 GN=HEL-S-99n PE=2 SV=1	45	16	142	16	1	417	48.1	4.44	534.95	16	0	2.5398e+08	4.16361e+08	1.87701e+08	2.86566e+08	2.79788e+08	2.56346e+08
Q6VFQ6	HBB	Hemoglobin beta chain (Fragment) OS=Homo sapiens OX=9606 GN=HBB PE=3 SV=1	100	5	151	2	1	42	4.5	8.24	533.46	5	0	122408	2.7003e+06	NA	646655	999116	NA
A0A0S2Z3H5	COL1A2	Collagen type I alpha 2 isoform 1 (Fragment) OS=Homo sapiens OX=9606 GN=COL1A2 PE=2 SV=1	25	23	136	23	1	1366	129.2	8.95	533.05	23	0	128471700	9.2766e+08	4.56401e+08	5.05472e+08	1426767729	7.59379e+08
P50454	SERPINH1	Serpin H1 OS=Homo sapiens OX=9606 GN=SERPINH1 PE=1 SV=2	51	22	145	22	1	418	46.4	8.69	531.64	22	0	7.13353e+07	7.36276e+08	1.72671e+08	3.02167e+08	2.14742e+08	1.87192e+08
P02533	KRT14	Keratin, type I cytoskeletal 14 OS=Homo sapiens OX=9606 GN=KRT14 PE=1 SV=4	67	39	161	15	1	472	51.5	5.16	529.5	39	25	8.3738e+07	5.6131e+07	4.06167e+07	1095007715	4.54217e+08	2843930840
V9HWE3	HEL-S-11	Carbonic anhydrase I, isoform CRA_a OS=Homo sapiens OX=9606 GN=HEL-S-11 PE=2 SV=1	69	15	153	15	1	261	28.9	7.12	522.11	15	0	2.46597e+08	6.54035e+08	1.28736e+08	2.46423e+08	1.77893e+08	4.01052e+08
P13639	EEF2	Elongation factor 2 OS=Homo sapiens OX=9606 GN=EEF2 PE=1 SV=4	47	37	157	36	1	858	95.3	6.83	513.47	37	1	6.61646e+07	2.75019e+08	8.60736e+07	1.02285e+08	1.48879e+08	1.1835e+08
K7ENT6	TPM4	Tropomyosin alpha-4 chain OS=Homo sapiens OX=9606 GN=TPM4 PE=1 SV=2	71	27	146	4	1	247	28.5	4.63	513.43	27	0	1.41601e+06	9.07274e+06	549863	2.53832e+06	1.65469e+07	8.05276e+06
O75369	FLNB	Filamin-B OS=Homo sapiens OX=9606 GN=FLNB PE=1 SV=2	32	56	162	52	1	2602	278	5.73	512.35	56	1	1.82484e+07	1.24882e+08	4.20963e+07	7.58581e+07	1.17573e+08	6.33004e+07
P00739	HPR	Haptoglobin-related protein OS=Homo sapiens OX=9606 GN=HPR PE=2 SV=2	42	17	150	3	1	348	39	7.09	502.94	17	0	1.23288e+06	6.17043e+06	4.04132e+06	4.38097e+06	NA	NA
P13647	KRT5	Keratin, type II cytoskeletal 5 OS=Homo sapiens OX=9606 GN=KRT5 PE=1 SV=3	49	36	156	23	1	590	62.3	7.74	496.15	36	0	5.9525e+06	6.27358e+06	5.78994e+06	2.243e+08	1.03835e+08	6.77346e+08
K9JA46	EL52	Epididymis luminal secretory protein 52 OS=Homo sapiens OX=9606 GN=EL52 PE=2 SV=1	41	29	150	17	1	732	84.6	5.02	495.9	29	13	1.08003e+08	3.41915e+08	1.26611e+08	1.54361e+08	1.93936e+08	1.3159e+08
V9HWP2	HEL-S-125m	Epididymis luminal protein 35 OS=Homo sapiens OX=9606 GN=HEL-S-125m PE=2 SV=1	47	37	152	35	1	803	92.4	4.84	495.2	37	2	6.70815e+07	3.18869e+08	1.01797e+08	2.02978e+08	1.57269e+08	1.37725e+08
Q59FP5	#N/A	Spectrin, beta, erythrocytic (Includes spherocytosis, clinical type I) variant (Fragment) OS=Homo sapiens OX=9606 PE=2 SV=1	31	55	155	54	1	2332	268.1	5.36	492.77	55	1	6.72554e+07	1.12185e+08	1.08064e+07	1.11688e+08	3.86962e+07	1.13102e+08
A0A024R9Q1	THBS1	Thrombospondin 1, isoform CRA_a OS=Homo sapiens OX=9606 GN=THBS1 PE=4 SV=1	42	39	145	38	1	1170	129.3	4.94	492.12	39	1	3.30282e+07	1.33014e+08	5.86829e+07	7.62041e+07	7.8658e+08	1.30491e+08
P04040	CAT	Catalase OS=Homo sapiens OX=9606 GN=CAT PE=1 SV=3	50	24	149	24	1	527	59.7	7.39	491.5	24	0	169673123	1.83348e+08	7.13362e+07	1.06246e+08	1.38869e+08	9.50538e+07
D3DSM0	ITGB2	Integrin beta OS=Homo sapiens OX=9606 GN=ITGB2 PE=1 SV=1	49	26	145	2	1	712	78.3	6.87	486.44	26	0	14347856	934173	5.71717e+06	7.84545e+06	5.40611e+06	9.59779e+06
A0A0S2Z4G4	TPM3	Tropomyosin 3 isoform 1 (Fragment) OS=Homo sapiens OX=9606 GN=TPM3 PE=2 SV=1	58	24	148	15	1	248	29	4.78	484.55	24	1	1.30527e+08	1.7311e+08	8.78412e+07	9.40295e+07	2.03529e+08	1.10677e+08
V9HW22	HEL-S-72p	Epididymis luminal protein 33 OS=Homo sapiens OX=9606 GN=HEL-S-72p PE=2 SV=1	52	29	150	3	1	646	70.9	5.52	483.71	29	24	1.82352e+08	3.07701e+08	1.35543e+08	2.17828e+08	3.20937e+08	2.00846e+08
A0A384NKS6	#N/A	Epididymis secretory sperm binding protein OS=Homo sapiens OX=9606 PE=2 SV=1	34	21	144	21	1	501	57.8	6.68	483.33	21	0	1.10941e+08	193419561	5.04382e+08	2.32032e+08	1.40115e+08	3.55864e+08
P32119	PRDX2	Peroxiredoxin-2 OS=Homo sapiens OX=9606 GN=PRDX2 PE=1 SV=5	71	15	138	14	1	198	21.9	5.97	482.97	15	0	1.23295e+08	3.26298e+08	5.95926e+07	1.88397e+08	1.44319e+08	296974414
A0A024RC65	hCG_1991735	HCG1991735, isoform CRA_a OS=Homo sapiens OX=9606 GN=hCG_1991735 PE=4 SV=1	35	44	148	41	1	1657	189.1	6.48	477.91	44	3	6.48276e+07	1.01603e+08	8.26768e+07	9.34352e+07	1.16106e+08	6.61866e+07
V9HW31	HEL-S-271	ATP synthase subunit beta OS=Homo sapiens OX=9606 GN=HEL-S-271 PE=2 SV=1	55	20	135	20	1	529	56.5	5.4	477.88	20	0	6.02976e+07	2.50707e+08	8.42477e+07	1.33528e+08	2.26153e+08	1.37668e+08
P04179	SOD2	Superoxide dismutase [Mn], mitochondrial OS=Homo sapiens OX=9606 GN=SOD2 PE=1 SV=3	53	15	128	13	1	222	24.7	8.25	477.69	15	2	6.89394e+07	1.57586e+08	1.38507e+08	1.46433e+08	627265925	1.43707e+08
D9ZGG2	VTN	Vitronectin OS=Homo sapiens OX=9606 GN=VTN PE=4 SV=1	29	12	156	12	1	478	54.3	5.8	476.24	12	0	2.30747e+08	1.26358e+08	561036317	459218786	214039186	6.89218e+08
A0A024RD80	HSP90AB1	Heat shock protein 90kDa alpha (Cytosolic), class B member 1, isoform CRA_a OS=Homo sapiens OX=9606 GN=HSP90AB1 PE=3 SV=1	39	28	149	14	1	724	83.2	5.03	471.64	28	0	3.97161e+07	1.01771e+08	6.0726e+07	6.50665e+07	7.6855e+07	6.4776e+07
Q05707	COL14A1	Collagen alpha-1(XIV) chain OS=Homo sapiens OX=9606 GN=COL14A1 PE=1 SV=3	36	51	140	51	1	1796	193.4	5.3	468.13	51	0	1.18306e+08	4.8472e+08	2.14828e+07	7.98364e+07	1.00906e+08	5.74138e+07
V9HWG7	HEL-S-52	Epididymis secretory protein Li 52 OS=Homo sapiens OX=9606 GN=HEL-S-52 PE=2 SV=1	62	25	123	25	1	606	66.2	6.65	464.81	25	0	8.64601e+07	1.16437e+08	6.91712e+07	1.01838e+08	1.57986e+08	9.25611e+07
B2RDW1	RPS27A	Epididymis luminal protein 112 OS=Homo sapiens OX=9606 GN=RPS27A PE=2 SV=1	52	7	152	7	1	156	18	9.64	439.77	7	0	197900358	1.17901e+08	1.052e+08	1.57333e+08	3.18696e+08	1.93865e+08
P13645	KRT10	Keratin, type I cytoskeletal 10 OS=Homo sapiens OX=9606 GN=KRT10 PE=1 SV=6	44	23	135	20	1	584	58.8	5.21	438.59	23	0	1.45904e+08	8.14711e+07	8.84827e+07	1.73258e+08	1.81039e+08	5.01921e+08
P60174	TPI1	Triosephosphate isomerase OS=Homo sapiens OX=9606 GN=TPI1 PE=1 SV=3	77	21	116	21	1	286	30.8	5.92	433.92	21	0	1.96603e+08	3.47932e+08	2.19353e+08	1.54035e+08	7.29451e+08	1.85825e+08
A0A0S2Z4G6	TPM1	Tropomyosin 1 (Alpha), isoform CRA_o (Fragment) OS=Homo sapiens OX=9606 GN=TPM1 PE=1 SV=1	49	23	132	4	1	284	32.7	4.74	424.63	23	7	4.28706e+06	6.98964e+07	1.72759e+07	2.0745e+07	9.73854e+07	1.258e+07
A6XGL1	#N/A	Transthyretin OS=Homo sapiens OX=9606 PE=2 SV=1	55	11	105	11	1	184	20.2	5.24	420.99	11	0	6.18753e+07	1.46567e+08	1.36802e+08	1.22518e+08	1.16766e+08	9.51944e+07
A5A3E0	POTEF	POTE ankyrin domain family member F OS=Homo sapiens OX=9606 GN=POTEF PE=1 SV=2	8	8	136	2	1	1075	121.4	6.2	418.06	8	0	350434	NA	NA	NA	1.10186e+06	NA
P08779	KRT16	Keratin, type I cytoskeletal 16 OS=Homo sapiens OX=9606 GN=KRT16 PE=1 SV=4	65	32	125	16	1	473	51.2	5.05	416.1	32	0	1.11252e+06	3.25004e+06	2.12887e+06	1.17131e+08	8.74415e+07	486487069
G3XAI2	LAMB1	Laminin subunit beta-1 OS=Homo sapiens OX=9606 GN=LAMB1 PE=1 SV=1	32	39	130	39	1	1810	200.3	4.96	411.71	39	0	2.69759e+07	1.78501e+08	3.29932e+07	9.62073e+07	135207790	7.5344e+07
A0A0G2JIW1	HSPA1B	Heat shock 70 kDa protein 1B OS=Homo sapiens OX=9606 GN=HSPA1B PE=1 SV=1	45	25	119	18	1	642	70.1	5.66	408.73	25	4	1.31152e+08	7.44726e+07	6.71312e+07	7.81027e+07	1.75306e+08	7.09514e+07
P20700	LMNB1	Lamin-B1 OS=Homo sapiens OX=9606 GN=LMNB1 PE=1 SV=2	50	31	134	29	1	586	66.4	5.16	406.59	31	2	1.50522e+08	143688487	1.05743e+08	1.42084e+08	1.88733e+08	1.53919e+08
P07737	PFN1	Profilin-1 OS=Homo sapiens OX=9606 GN=PFN1 PE=1 SV=2	72	14	126	14	1	140	15	8.27	396.91	14	0	2.4925e+08	2.25422e+08	1.97077e+08	2.7115e+08	4.24289e+08	3.75008e+08
P08246	ELANE	Neutrophil elastase OS=Homo sapiens OX=9606 GN=ELANE PE=1 SV=1	38	10	98	10	1	267	28.5	9.35	396.1	10	0	9.4445e+08	5.08674e+07	1.92425e+08	3.52467e+08	2.58755e+08	4.0695e+08
B2RDY9	#N/A	Adenylyl cyclase-associated protein OS=Homo sapiens OX=9606 PE=2 SV=1	60	20	117	20	1	475	51.6	8.22	395.4	20	0	1.11645e+08	1.59202e+08	8.2914e+07	1.15723e+08	1.92889e+08	8.43856e+07
Q9Y6C2	EMILIN1	EMILIN-1 OS=Homo sapiens OX=9606 GN=EMILIN1 PE=1 SV=3	37	29	112	29	1	1016	106.6	5.17	384.52	29	0	1.83563e+07	1.06738e+08	4.42668e+07	3.79579e+07	1.17882e+08	4.84583e+07
P55072	VCP	Transitional endoplasmic reticulum ATPase OS=Homo sapiens OX=9606 GN=VCP PE=1 SV=4	47	30	118	30	1	806	89.3	5.26	377.76	30	0	4.33434e+07	1.33008e+08	3.58041e+07	5.07218e+07	1.01701e+08	5.56176e+07
P13489	RNH1	Ribonuclease inhibitor OS=Homo sapiens OX=9606 GN=RNH1 PE=1 SV=2	58	19	103	19	1	461	49.9	4.82	374.4	19	0	4.4694e+07	6.93398e+07	3.43143e+07	4.4471e+07	1.03013e+08	5.75075e+07
P35527	KRT9	Keratin, type I cytoskeletal 9 OS=Homo sapiens OX=9606 GN=KRT9 PE=1 SV=3	59	20	92	20	1	623	62	5.24	373.11	20	0	4.34182e+07	5.59037e+07	2.78119e+07	2.63144e+07	1.08073e+08	2.01825e+08
P25705	ATP5F1A	ATP synthase subunit alpha, mitochondrial OS=Homo sapiens OX=9606 GN=ATP5F1A PE=1 SV=1	52	27	114	27	1	553	59.7	9.13	369.84	27	0	5.86082e+07	2.2974e+08	5.92693e+07	1.2023e+08	1.46653e+08	9.69676e+07
A8K8D9	#N/A	Glucose-6-phosphate 1-dehydrogenase OS=Homo sapiens OX=9606 PE=2 SV=1	50	23	124	23	1	515	59.3	6.73	367.77	23	0	1.13601e+08	2.44887e+07	72145924	9.34961e+07	8.66296e+07	7.36468e+07
Q14112	NID2	Nidogen-2 OS=Homo sapiens OX=9606 GN=NID2 PE=1 SV=3	30	32	114	15	1	1375	151.2	5.29	367.02	32	17	1.29381e+07	1.82838e+08	2.37325e+07	8.24149e+07	8.83297e+07	5.89134e+07
H0UI49	LAMA4	Laminin, alpha 4, isoform CRA_b OS=Homo sapiens OX=9606 GN=LAMA4 PE=4 SV=1	26	35	107	35	1	1816	201.7	6.3	362.56	35	0	8.35844e+06	1.41552e+08	1.07458e+07	5.49109e+07	9.74188e+07	4.69725e+07
A0A024RAZ7	HNRPA1	Heterogeneous nuclear ribonucleoprotein A1, isoform CRA_b OS=Homo sapiens OX=9606 GN=HNRPA1 PE=4 SV=1	47	16	102	11	1	372	38.7	9.13	357.14	16	3	2.72843e+07	8.2168e+07	2.08317e+07	2.60312e+07	4.66648e+07	3.36715e+07
P20160	AZU1	Azurocidin OS=Homo sapiens OX=9606 GN=AZU1 PE=1 SV=3	40	7	93	7	1	251	26.9	9.5	355.94	7	0	9.53538e+08	4.81829e+07	3.8036e+08	5.111e+08	6.11921e+08	1.44907e+08
A8K486	#N/A	Peptidyl-prolyl cis-trans isomerase OS=Homo sapiens OX=9606 PE=2 SV=1	57	9	102	9	1	165	18	6.9	355.36	9	0	126124948	2.24779e+08	1.26071e+08	1.48478e+08	3.37778e+08	192175560
P22626	HNRNPA2B1	Heterogeneous nuclear ribonucleoproteins A2/B1 OS=Homo sapiens OX=9606 GN=HNRNPA2B1 PE=1 SV=2	62	17	106	15	1	353	37.4	8.95	354.68	17	2	6.86992e+07	217319042	5.60972e+07	1.0489e+08	1.39179e+08	8.29855e+07
A0A087WUZ3	SPTBN1	Spectrin beta chain OS=Homo sapiens OX=9606 GN=SPTBN1 PE=1 SV=1	27	47	112	46	1	2366	274.7	5.57	353.7	47	0	2.74205e+07	6.84796e+07	1.96533e+07	2.57544e+07	7.30895e+07	3.5809e+07
A0A024R718	PBEF1	Nicotinamide phosphoribosyltransferase OS=Homo sapiens OX=9606 GN=PBEF1 PE=3 SV=1	42	18	114	18	1	491	55.5	7.15	353.41	18	0	5.99647e+07	4.87116e+07	6.27597e+07	6.93816e+07	2.74985e+08	9.27996e+07
P04217	A1BG	Alpha-1B-glycoprotein OS=Homo sapiens OX=9606 GN=A1BG PE=1 SV=4	48	14	104	14	1	495	54.2	5.86	353.26	14	0	1.11835e+08	1.2458e+08	1.2256e+08	1.27329e+08	1.69556e+08	7.92948e+07
D3DNU8	KNG1	Kininogen 1, isoform CRA_a OS=Homo sapiens OX=9606 GN=KNG1 PE=4 SV=1	40	15	101	15	1	427	47.8	6.65	352.14	15	0	6.6089e+07	1.06775e+08	9.06974e+07	1.09854e+08	6.61946e+07	5.15609e+07
E2RVJ0	SLC4A1	Anion exchange protein OS=Homo sapiens OX=9606 GN=SLC4A1 PE=2 SV=1	30	19	106	19	1	912	101.9	5.22	352.06	19	0	1.02543e+08	2.68486e+08	2.73614e+07	1.79925e+08	4.86042e+07	1.33195e+08
A0A024R035	C9	Complement component 9, isoform CRA_a OS=Homo sapiens OX=9606 GN=C9 PE=4 SV=1	39	21	104	21	1	559	63.2	5.52	351.83	21	0	9.93196e+07	9.6747e+07	1.052e+08	1.20755e+08	1.62859e+08	2.35859e+08
B2ZDQ1	NGAL	Neutrophil gelatinase-associated lipocalin OS=Homo sapiens OX=9606 GN=NGAL PE=2 SV=1	67	15	108	15	1	199	22.7	8.91	351.26	15	0	3.59645e+08	1.46163e+07	1.94507e+08	1.38963e+08	2.85992e+08	2.11294e+08
P00338	LDHA	L-lactate dehydrogenase A chain OS=Homo sapiens OX=9606 GN=LDHA PE=1 SV=2	52	15	103	14	1	332	36.7	8.27	345.25	15	0	1.34965e+08	2.03498e+08	1.33297e+08	9.74361e+07	3.15266e+08	147465356
B7Z6G4	#N/A	cDNA FLJ53193, highly similar to Homo sapiens caldesmon 1 (CALD1), transcript variant 5, mRNA OS=Homo sapiens OX=9606 PE=2 SV=1	42	24	101	24	1	543	62.7	5.91	344.08	24	0	2.22837e+07	2.4349e+08	6.84509e+07	6.17915e+07	1.41601e+08	4.39087e+07
P02462	COL4A1	Collagen alpha-1(IV) chain OS=Homo sapiens OX=9606 GN=COL4A1 PE=1 SV=4	8	10	96	10	1	1669	160.5	8.28	341.67	10	0	3.98567e+07	1.32468e+08	6.24804e+07	1.10247e+08	349049575	2.08933e+08
A0A024R5W6	TPM1	Tropomyosin 1 (Alpha), isoform CRA_a OS=Homo sapiens OX=9606 GN=TPM1 PE=3 SV=1	54	19	104	4	1	284	32.7	4.74	338.07	19	0	128477	3.81552e+06	NA	516770	1.37221e+07	1.58979e+06
B7Z6Z4	MYL6	cDNA FLJ56329, highly similar to Myosin light polypeptide 6 OS=Homo sapiens OX=9606 GN=MYL6 PE=1 SV=1	37	9	92	9	1	238	26.7	5.08	328.86	9	0	2.89981e+08	5.41357e+08	210282201	3.54266e+08	5.09377e+08	3.11331e+08
B4DR52	#N/A	Histone H2B OS=Homo sapiens OX=9606 PE=2 SV=1	33	6	106	6	1	166	18	10.32	328.03	6	0	3.22079e+08	3.38851e+08	1.77094e+08	2.47212e+08	4.20134e+08	2.82826e+08
P23142	FBLN1	Fibulin-1 OS=Homo sapiens OX=9606 GN=FBLN1 PE=1 SV=4	39	20	106	8	1	703	77.2	5.22	327.4	20	11	1.14098e+08	2.45369e+08	1.50563e+08	1.01477e+08	1.53909e+08	8.43881e+07
B4E1Z4	#N/A	cDNA FLJ55673, highly similar to Complement factor B OS=Homo sapiens OX=9606 PE=1 SV=1	25	25	100	4	1	1266	140.9	7.18	325.9	25	19	7.90553e+07	1.43738e+08	9.18613e+07	1.23526e+08	1.29061e+08	5.74765e+07
A0A024R319	LAMB2	Laminin, beta 2 (Laminin S), isoform CRA_a OS=Homo sapiens OX=9606 GN=LAMB2 PE=4 SV=1	36	46	100	46	1	1798	195.9	6.52	325.87	46	0	1.55388e+06	4.02449e+07	347562	7.36297e+06	346279682	1.50867e+08
P27824	CANX	Calnexin OS=Homo sapiens OX=9606 GN=CANX PE=1 SV=2	30	16	94	16	1	592	67.5	4.6	325.05	16	0	6.34098e+07	7.43231e+07	4.48518e+07	6.57339e+07	6.92894e+07	8.59882e+07
Q06830	PRDX1	Peroxiredoxin-1 OS=Homo sapiens OX=9606 GN=PRDX1 PE=1 SV=1	72	18	104	15	1	199	22.1	8.13	324.8	18	3	1.06141e+08	3.6177e+08	1.47125e+08	1.8265e+08	2.34934e+08	204938188
P12429	ANXA3	Annexin A3 OS=Homo sapiens OX=9606 GN=ANXA3 PE=1 SV=3	48	17	102	17	1	323	36.4	5.92	324.19	17	0	3.93512e+08	18607726	124404346	1.84734e+08	1.98785e+08	1.86466e+08
X5D2M8	MVP	Major vault protein isoform A (Fragment) OS=Homo sapiens OX=9606 GN=MVP PE=2 SV=1	43	32	99	32	1	893	99.3	5.48	324.06	32	0	3.76791e+07	115686691	3.27682e+07	49538138	7.5625e+07	4.89883e+07
P08758	ANXA5	Annexin A5 OS=Homo sapiens OX=9606 GN=ANXA5 PE=1 SV=2	63	19	108	19	1	320	35.9	5.05	323.39	19	0	5.28461e+07	4.25567e+08	8.28844e+07	1.32422e+08	3.32548e+08	9.82755e+07
E9PK25	CFL1	Cofilin-1 OS=Homo sapiens OX=9606 GN=CFL1 PE=1 SV=1	55	13	80	13	1	204	22.7	8.34	323.07	13	0	1.29105e+08	295316904	1.56147e+08	158088049	1.40342e+08	1.20904e+08
P00488	F13A1	Coagulation factor XIII A chain OS=Homo sapiens OX=9606 GN=F13A1 PE=1 SV=4	27	16	91	15	1	732	83.2	6.09	322.64	16	1	1.87466e+07	3.95483e+07	5.22282e+07	4.47208e+07	4.90795e+07	4.09789e+07
B7Z722	TPM1	Tropomyosin 1 (Alpha), isoform CRA_i OS=Homo sapiens OX=9606 GN=TPM1 PE=2 SV=1	54	17	100	2	1	248	28.6	4.79	320.48	17	0	416837	1.92022e+06	324112	746918	1.15239e+06	NA
P22314	UBA1	Ubiquitin-like modifier-activating enzyme 1 OS=Homo sapiens OX=9606 GN=UBA1 PE=1 SV=3	29	22	86	22	1	1058	117.8	5.76	319.38	22	0	2.53164e+07	6.48526e+07	3.39145e+07	4.90059e+07	7.0484e+07	3.43398e+07
B2RMS9	ITIH4	Inter-alpha (Globulin) inhibitor H4 (Plasma Kallikrein-sensitive glycoprotein) OS=Homo sapiens OX=9606 GN=ITIH4 PE=2 SV=1	32	24	100	24	1	930	103.3	6.98	318.95	24	0	6.86977e+07	8.06085e+07	1.00466e+08	1.22099e+08	36441213	5.84994e+07
P51888	PRELP	Prolargin OS=Homo sapiens OX=9606 GN=PRELP PE=1 SV=1	45	15	107	15	1	382	43.8	9.38	316.8	15	0	5.33981e+06	5.47732e+07	623802	1.0059e+06	8.29611e+08	4.30935e+08
A0A024RDW8	COL4A2	Collagen, type IV, alpha 2, isoform CRA_a OS=Homo sapiens OX=9606 GN=COL4A2 PE=4 SV=1	13	15	95	15	1	1712	167.4	8.66	316.55	15	0	1.75228e+07	1.24106e+08	4.80665e+07	9.94556e+07	4.3943e+08	173315719
A0A2S0BDD1	ATIII-R2	Antithrombin III isoform OS=Homo sapiens OX=9606 GN=ATIII-R2 PE=2 SV=1	36	17	94	17	1	505	57.3	7.85	305.1	17	0	2.68754e+07	4.74544e+07	6.56748e+07	1.01614e+08	6.52668e+07	3.37392e+07
P23284	PPIB	Peptidyl-prolyl cis-trans isomerase B OS=Homo sapiens OX=9606 GN=PPIB PE=1 SV=2	61	15	107	15	1	216	23.7	9.41	304.01	15	0	6.00759e+07	3.35653e+08	1.07845e+08	1.33863e+08	1.3167e+08	8.5212e+07
A0A024RAI1	ACTR3	ARP3 actin-related protein 3 homolog (Yeast), isoform CRA_a OS=Homo sapiens OX=9606 GN=ACTR3 PE=3 SV=1	54	16	94	16	1	418	47.3	5.88	303.76	16	0	8.50983e+07	7.68403e+07	5.12109e+07	7.46584e+07	1.19747e+08	8.64484e+07
P52209	PGD	6-phosphogluconate dehydrogenase, decarboxylating OS=Homo sapiens OX=9606 GN=PGD PE=1 SV=3	43	19	100	5	1	483	53.1	7.23	302.46	19	15	1.4929e+08	6.5266e+07	7.17476e+07	6.13623e+07	1.17253e+08	7.00843e+07
Q14204	DYNC1H1	Cytoplasmic dynein 1 heavy chain 1 OS=Homo sapiens OX=9606 GN=DYNC1H1 PE=1 SV=5	14	51	99	51	1	4646	532.1	6.4	299.34	51	0	1.5203e+07	7.03722e+07	1.74456e+07	3.12264e+07	3.75689e+07	3.47171e+07
A0A140VK00	#N/A	Testicular tissue protein Li 227 OS=Homo sapiens OX=9606 PE=2 SV=1	54	14	87	14	1	298	34.2	6.05	298.48	14	0	4.81664e+07	6.04864e+07	7.4134e+07	5.27361e+07	7.43806e+07	5.5818e+07
P06702	S100A9	Protein S100-A9 OS=Homo sapiens OX=9606 GN=S100A9 PE=1 SV=1	68	9	83	9	1	114	13.2	6.13	298.03	9	0	2248265100	3.09048e+07	3.84773e+08	3.72044e+08	7.75849e+08	3.93275e+08
O15230	LAMA5	Laminin subunit alpha-5 OS=Homo sapiens OX=9606 GN=LAMA5 PE=1 SV=8	15	40	96	40	1	3695	399.5	7.02	295.62	40	0	3.36416e+06	2.30981e+07	1.6585e+06	2.54173e+07	1.4892e+08	8.90177e+07
A0A024RDR0	HMGB1	High-mobility group box 1, isoform CRA_a OS=Homo sapiens OX=9606 GN=HMGB1 PE=4 SV=1	40	11	80	9	1	215	24.9	5.74	293.85	11	2	7.93655e+07	8.93242e+07	6.03587e+07	5.8492e+07	9.76463e+07	7.23633e+07
Q9H4B7	TUBB1	Tubulin beta-1 chain OS=Homo sapiens OX=9606 GN=TUBB1 PE=1 SV=1	16	8	105	4	1	451	50.3	5.17	292.15	8	0	71621.7	1.79582e+06	392686	2.37692e+06	832305	3.61985e+06
Q53G35	#N/A	Phosphoglycerate mutase (Fragment) OS=Homo sapiens OX=9606 PE=2 SV=1	58	13	85	13	1	254	28.8	7.18	291.52	13	0	7.02622e+07	7.45631e+07	5.75754e+07	6.01209e+07	1.6023e+08	4.46758e+07
P24158	PRTN3	Myeloblastin OS=Homo sapiens OX=9606 GN=PRTN3 PE=1 SV=3	31	5	79	5	1	256	27.8	8.35	290.44	5	0	5.71011e+08	2.96543e+07	1.75879e+08	1.66649e+08	2.96091e+08	1.50169e+08
A0A024R3X4	HSPD1	Epididymis secretory sperm binding protein OS=Homo sapiens OX=9606 GN=HSPD1 PE=2 SV=1	53	25	83	25	1	573	61	5.87	287.77	25	0	2.28354e+07	1.4344e+08	2.72675e+07	5.99508e+07	7.4414e+07	4.77132e+07
Q04695	KRT17	Keratin, type I cytoskeletal 17 OS=Homo sapiens OX=9606 GN=KRT17 PE=1 SV=2	46	25	93	10	1	432	48.1	5.02	284.11	25	1	1.89703e+06	1.71238e+06	584922	1.23041e+08	2.9324e+07	1.93635e+08
P26583	HMGB2	High mobility group protein B2 OS=Homo sapiens OX=9606 GN=HMGB2 PE=1 SV=2	37	10	80	8	1	209	24	7.81	283.64	10	0	1.25789e+08	1.47234e+07	4.22619e+07	3.03283e+07	7.51606e+07	5.4354e+07
A0A024R611	CORO1A	Coronin OS=Homo sapiens OX=9606 GN=CORO1A PE=3 SV=1	44	19	87	19	1	461	51	6.68	283.18	19	0	2.44179e+08	8.25119e+07	135274460	1.90409e+08	2.30186e+08	1.11434e+08
P02649	APOE	Apolipoprotein E OS=Homo sapiens OX=9606 GN=APOE PE=1 SV=1	58	19	92	19	1	317	36.1	5.73	282.04	19	0	70476294	1.38949e+08	1.17268e+08	1.63877e+08	5.34558e+07	9.35326e+07
P07858	CTSB	Cathepsin B OS=Homo sapiens OX=9606 GN=CTSB PE=1 SV=3	39	14	81	14	1	339	37.8	6.3	280.86	14	0	4.78192e+07	1.51369e+08	1.635e+08	7.88525e+07	1.992e+08	1.0536e+08
B7Z8Q2	#N/A	cDNA FLJ55606, highly similar to Alpha-2-HS-glycoprotein OS=Homo sapiens OX=9606 PE=2 SV=1	23	7	68	7	1	433	46.6	6.28	280.55	7	0	5.19434e+07	74508937	1.00104e+08	1.06168e+08	6.52708e+07	4.28992e+07
P35908	KRT2	Keratin, type II cytoskeletal 2 epidermal OS=Homo sapiens OX=9606 GN=KRT2 PE=1 SV=2	38	20	89	12	1	639	65.4	8	278.67	20	0	3.46407e+07	2.29568e+07	1.81412e+07	3.71065e+07	3.33581e+07	2.83883e+07
Q86VB7	CD163	Scavenger receptor cysteine-rich type 1 protein M130 OS=Homo sapiens OX=9606 GN=CD163 PE=1 SV=2	31	22	77	22	1	1156	125.4	5.95	277.43	22	0	1.08575e+07	2.87383e+07	2.79739e+07	2.07469e+07	5.69714e+07	4.51257e+07
E7ETN3	#N/A	Uncharacterized protein OS=Homo sapiens OX=9606 PE=1 SV=1	25	23	87	2	1	1115	123.9	6.8	275.98	23	0	4.30337e+07	1.74857e+08	9.70632e+07	9.06768e+07	2.63531e+08	2.1595e+08
V9HWF6	HEL-S-153w	Alpha-1-acid glycoprotein OS=Homo sapiens OX=9606 GN=HEL-S-153w PE=2 SV=1	41	8	93	6	1	201	23.5	5.02	275.71	8	2	4.76648e+08	445821137	4.22231e+08	5.26046e+08	1054513066	3.52567e+08
P26641	EEF1G	Elongation factor 1-gamma OS=Homo sapiens OX=9606 GN=EEF1G PE=1 SV=3	32	14	89	12	1	437	50.1	6.67	275.59	14	2	3.85382e+07	115426110	5.76547e+07	6.55676e+07	5.51136e+07	6.33563e+07
B4DJ30	#N/A	cDNA FLJ61290, highly similar to Neutral alpha-glucosidase AB OS=Homo sapiens OX=9606 PE=2 SV=1	37	25	88	25	1	995	112.9	6.06	273.8	25	0	2.51266e+07	7.95576e+07	3.26356e+07	4.81834e+07	5.48999e+07	5.70779e+07
A4D275	ARPC1B	Actin-related protein 2/3 complex subunit OS=Homo sapiens OX=9606 GN=ARPC1B PE=2 SV=1	48	12	66	11	1	372	40.9	8.35	271.36	12	1	6.94781e+07	6.90305e+07	5.06753e+07	6.20647e+07	1.15925e+08	7.9683e+07
P04899	GNAI2	Guanine nucleotide-binding protein G(i) subunit alpha-2 OS=Homo sapiens OX=9606 GN=GNAI2 PE=1 SV=3	49	17	81	11	1	355	40.4	5.54	268.68	17	6	1.54021e+08	1.11209e+08	9.3016e+07	1.48256e+08	1.10996e+08	1.22931e+08
Q6P528	ASPN	Asporin OS=Homo sapiens OX=9606 GN=ASPN PE=2 SV=1	36	13	79	13	1	384	43.9	6.48	266.84	13	0	722603	6.77096e+07	1.13835e+06	7.15255e+06	4.03109e+08	2.106e+08
P02760	AMBP	Protein AMBP OS=Homo sapiens OX=9606 GN=AMBP PE=1 SV=1	43	15	76	15	1	352	39	6.25	265.86	15	0	4.62586e+07	4.87464e+07	8.26505e+07	1.07106e+08	1.40212e+08	7.82378e+07
P01031	C5	Complement C5 OS=Homo sapiens OX=9606 GN=C5 PE=1 SV=4	20	29	92	29	1	1676	188.2	6.52	259.71	29	0	4.62703e+07	5.61098e+07	6.90291e+07	6.79171e+07	2.31113e+07	5.24935e+07
Q0P5N8	TMSB4X	TMSB4X protein (Fragment) OS=Homo sapiens OX=9606 GN=TMSB4X PE=2 SV=1	34	4	70	4	1	70	7.8	8.13	258.59	4	0	1.04816e+08	6.10983e+07	7.91816e+07	5.83403e+07	1.97643e+08	5.43916e+07
P05109	S100A8	Protein S100-A8 OS=Homo sapiens OX=9606 GN=S100A8 PE=1 SV=1	55	10	80	10	1	93	10.8	7.03	252.15	10	0	1987469317	3.05991e+07	3.67561e+08	4.55203e+08	4.33363e+08	4.66841e+08
Q8NBS9	TXNDC5	Thioredoxin domain-containing protein 5 OS=Homo sapiens OX=9606 GN=TXNDC5 PE=1 SV=2	40	15	76	15	1	432	47.6	5.97	252.15	15	0	1.29131e+07	1.33194e+08	3.92784e+07	6.04244e+07	6.53104e+07	2.99775e+07
D0PNI1	YWHAZ	Epididymis luminal protein 4 OS=Homo sapiens OX=9606 GN=YWHAZ PE=2 SV=1	46	12	72	10	1	245	27.7	4.79	249.18	12	0	1.13447e+08	1.65323e+08	1.06262e+08	1.16712e+08	2.28258e+08	1.69638e+08
A0A1W1B5Q9	HLA-A	MHC class I antigen OS=Homo sapiens OX=9606 GN=HLA-A PE=3 SV=1	48	13	68	2	1	365	40.8	6.1	247.51	13	10	4.27633e+07	1.27882e+08	4.54054e+07	8.0703e+07	8.57041e+07	8.26508e+07
A0A384MR27	#N/A	Epididymis secretory sperm binding protein OS=Homo sapiens OX=9606 PE=2 SV=1	56	10	77	10	1	135	14.7	5.5	247.31	10	0	261421881	1004544029	3.48814e+08	4.1288e+08	8.873e+08	3.73104e+08
B2R829	#N/A	cDNA, FLJ93711, highly similar to Homo sapiens myeloid cell nuclear differentiation antigen (MNDA), mRNA OS=Homo sapiens OX=9606 PE=2 SV=1	40	18	77	18	1	407	45.8	9.76	246.3	18	0	9.99317e+07	2.27565e+07	6.02054e+07	9.02942e+07	8.28388e+07	74034586
B4DWA6	#N/A	cDNA FLJ60094, highly similar to F-actin capping protein subunit beta OS=Homo sapiens OX=9606 PE=2 SV=1	41	13	68	13	1	335	37.5	6.14	243.52	13	0	6.16693e+07	4.90569e+07	5.21374e+07	44113368	7.346e+07	5.32765e+07
D3DRR6	ITIH2	Inter-alpha (Globulin) inhibitor H2, isoform CRA_a OS=Homo sapiens OX=9606 GN=ITIH2 PE=4 SV=1	21	16	79	16	1	947	106.5	6.95	241.79	16	0	4.36495e+07	1.16172e+08	1.65516e+08	1.423e+08	1.98778e+07	6.41734e+07
P16157	ANK1	Ankyrin-1 OS=Homo sapiens OX=9606 GN=ANK1 PE=1 SV=3	28	32	75	32	1	1881	206.1	6.01	240.6	32	0	1.62502e+07	6.86905e+07	7.24973e+06	3.27139e+07	4.11356e+07	5.72262e+07
A0A1C7CYX9	DPYSL2	Dihydropyrimidinase-related protein 2 OS=Homo sapiens OX=9606 GN=DPYSL2 PE=1 SV=1	41	20	71	18	1	677	73.5	6.35	239.89	20	0	1.69956e+07	8.46846e+07	2.9122e+07	3.60408e+07	1.00168e+08	3.44523e+07
P30740	SERPINB1	Leukocyte elastase inhibitor OS=Homo sapiens OX=9606 GN=SERPINB1 PE=1 SV=1	39	13	70	13	1	379	42.7	6.28	237.72	13	0	4.00358e+07	1.56342e+07	9.84639e+07	1.40737e+08	1.73254e+08	1.71679e+07
P63244	RACK1	Receptor of activated protein C kinase 1 OS=Homo sapiens OX=9606 GN=RACK1 PE=1 SV=3	70	17	68	17	1	317	35.1	7.69	235.03	17	0	4.44274e+07	2.03979e+08	5.87669e+07	8.23064e+07	7.33295e+07	6.90144e+07
P16401	HIST1H1B	Histone H1.5 OS=Homo sapiens OX=9606 GN=HIST1H1B PE=1 SV=3	22	10	69	9	1	226	22.6	10.92	234.88	10	1	2.65675e+08	1.86417e+08	1.37319e+08	1.44488e+08	158267713	144324255
P21796	VDAC1	Voltage-dependent anion-selective channel protein 1 OS=Homo sapiens OX=9606 GN=VDAC1 PE=1 SV=2	59	13	70	12	1	283	30.8	8.54	234.16	13	1	2.37145e+07	1.12074e+08	3.33291e+07	52873018	4.24509e+07	5.20035e+07
P08311	CTSG	Cathepsin G OS=Homo sapiens OX=9606 GN=CTSG PE=1 SV=2	53	12	72	12	1	255	28.8	11.19	232.4	12	0	8.25839e+08	6.28139e+07	157291141	2.37376e+08	2.77046e+08	2.32214e+08
B7Z9B8	#N/A	cDNA FLJ56912, highly similar to Fibulin-2 OS=Homo sapiens OX=9606 PE=2 SV=1	19	16	68	16	1	1210	129.3	4.87	231.79	16	0	8.73383e+06	5.20039e+07	3.24437e+07	4.29748e+07	7.08729e+07	2.97153e+07
B4DLV7	#N/A	Rab GDP dissociation inhibitor OS=Homo sapiens OX=9606 PE=2 SV=1	74	29	78	20	1	449	51.1	8.18	231.77	29	8	4.56036e+07	7.75617e+07	3.56361e+07	3.20612e+07	7.52325e+07	5.11762e+07
G8JLB6	HNRNPH1	Heterogeneous nuclear ribonucleoprotein H OS=Homo sapiens OX=9606 GN=HNRNPH1 PE=1 SV=1	42	13	69	7	1	472	51.2	6.8	230.44	13	6	28999854	9.29411e+07	3.44115e+07	5.1747e+07	6.09168e+07	4.82749e+07
A0A384N5Z8	#N/A	Epididymis secretory sperm binding protein OS=Homo sapiens OX=9606 PE=2 SV=1	24	16	68	16	1	707	76.1	9.44	229.71	16	0	2.06998e+07	7.76817e+07	2.25998e+07	3.02322e+07	4.61379e+07	3.09105e+07
A0A384MDT7	#N/A	Epididymis secretory sperm binding protein OS=Homo sapiens OX=9606 PE=2 SV=1	18	12	72	2	1	639	69.9	5.83	229.65	12	0	430771	3.75985e+06	548858	1.12961e+06	3.04131e+06	1.23366e+06
O00299	CLIC1	Chloride intracellular channel protein 1 OS=Homo sapiens OX=9606 GN=CLIC1 PE=1 SV=4	64	14	68	14	1	241	26.9	5.17	229.16	14	0	1.06226e+08	8.98415e+07	7.51375e+07	9.35055e+07	9.65747e+07	1.02796e+08
P16402	HIST1H1D	Histone H1.3 OS=Homo sapiens OX=9606 GN=HIST1H1D PE=1 SV=2	21	9	67	8	1	221	22.3	11.02	228	9	0	2.81963e+08	3.44495e+08	206500745	2.35274e+08	3.21696e+08	2.07662e+08
J3QRS3	MYL12A	Myosin regulatory light chain 12A OS=Homo sapiens OX=9606 GN=MYL12A PE=1 SV=1	60	9	62	4	1	177	20.4	4.75	226.72	9	5	130326593	231982120	7.75691e+07	1.34287e+08	2.3464e+08	1.44649e+08
B4DUQ1	#N/A	cDNA FLJ54552, highly similar to Heterogeneous nuclear ribonucleoprotein K OS=Homo sapiens OX=9606 PE=2 SV=1	50	20	73	20	1	439	48.5	5.92	226.71	20	0	3.43177e+07	1.57447e+08	4.48966e+07	5.56584e+07	7.6917e+07	4.53879e+07
B7Z539	#N/A	cDNA FLJ56954, highly similar to Inter-alpha-trypsin inhibitor heavy chain H1 OS=Homo sapiens OX=9606 PE=2 SV=1	34	17	58	11	1	645	72.1	7.68	223.67	17	6	1.7399e+07	1.6219e+08	5.44327e+07	69895389	2.53322e+07	2.65758e+07
Q92626	PXDN	Peroxidasin homolog OS=Homo sapiens OX=9606 GN=PXDN PE=1 SV=2	29	28	70	28	1	1479	165.2	7.17	222.57	28	0	9.83773e+06	7.31928e+07	9.39132e+06	3.68098e+07	7.34173e+07	3.53228e+07
P11678	EPX	Eosinophil peroxidase OS=Homo sapiens OX=9606 GN=EPX PE=1 SV=2	30	24	78	20	1	715	81	10.29	222.19	24	0	1.12415e+07	7.87787e+07	435702	3.56691e+07	1.0701e+06	1.96487e+06
Q5CZI2	DKFZp686D12108	Uncharacterized protein DKFZp686D12108 (Fragment) OS=Homo sapiens OX=9606 GN=DKFZp686D12108 PE=2 SV=1	25	18	63	2	1	1180	129.6	5.31	221.44	18	0	NA	5.0102e+06	NA	1.4437e+06	1.87643e+06	NA
A0A384NY64	#N/A	Epididymis secretory sperm binding protein OS=Homo sapiens OX=9606 PE=2 SV=1	62	8	60	3	1	172	19.8	4.92	220.3	8	0	4.12707e+06	6.67782e+07	7.45173e+06	1.94779e+07	3.69339e+07	1.29872e+07
H0YFD6	HADHA	Trifunctional enzyme subunit alpha, mitochondrial OS=Homo sapiens OX=9606 GN=HADHA PE=1 SV=2	40	21	64	21	1	792	86.3	9.1	219.81	21	0	1.0716e+07	67557979	1.30285e+07	2.53168e+07	4.66848e+07	2.18207e+07
P0DOX2	#N/A	Immunoglobulin alpha-2 heavy chain OS=Homo sapiens OX=9606 PE=1 SV=2	42	14	71	5	1	455	48.9	6.67	219.12	14	4	2.63235e+07	3.08052e+07	5.98049e+07	3.66704e+07	4.67629e+07	3.79327e+07
A8K7F6	#N/A	cDNA FLJ78244, highly similar to Homo sapiens eukaryotic translation initiation factor 4A, isoform 1 (EIF4A1), mRNA OS=Homo sapiens OX=9606 PE=2 SV=1	50	16	70	15	1	406	46.1	5.48	213.78	16	1	3.24063e+07	9.63911e+07	4.27338e+07	6.57574e+07	6.13205e+07	5.18741e+07
A0A140VK27	#N/A	Leukotriene A(4) hydrolase OS=Homo sapiens OX=9606 PE=2 SV=1	39	19	67	19	1	611	69.2	6.18	213.45	19	0	8.00911e+07	1.39124e+07	4.13543e+07	4.13797e+07	5.84244e+07	3.82185e+07
Q59FF0	#N/A	EBNA-2 co-activator variant (Fragment) OS=Homo sapiens OX=9606 PE=2 SV=1	30	24	73	9	1	964	107.4	7.52	213.25	24	14	1.87806e+07	8.8114e+07	2.79779e+07	3.59432e+07	4.24473e+07	3.46889e+07
Q546C9	HLA-B	MHC class I antigen OS=Homo sapiens OX=9606 GN=HLA-B PE=3 SV=1	40	11	62	3	1	362	40.5	6	212.8	11	6	1.75829e+07	5.62587e+07	1.45797e+07	2.36223e+07	2.60727e+07	2.4182e+07
A0A2U3TZU2	GPI	Glucose-6-phosphate isomerase OS=Homo sapiens OX=9606 GN=GPI PE=1 SV=1	37	18	63	18	1	597	67.2	8.97	212.65	18	0	1.21787e+08	5.71178e+07	7.11252e+07	5.05264e+07	8.40973e+07	7.22426e+07
Q03591	CFHR1	Complement factor H-related protein 1 OS=Homo sapiens OX=9606 GN=CFHR1 PE=1 SV=2	65	13	60	3	1	330	37.6	7.39	212.41	13	4	3.41656e+07	2.68045e+07	7.62986e+07	4.67765e+07	1.43446e+07	1.00965e+07
P31946	YWHAB	14-3-3 protein beta/alpha OS=Homo sapiens OX=9606 GN=YWHAB PE=1 SV=3	45	12	61	8	1	246	28.1	4.83	211.7	12	2	4.40393e+07	4.71318e+07	2.47101e+07	4.07291e+07	7.24961e+07	3.00444e+07
B2R8I2	#N/A	cDNA, FLJ93914, highly similar to Homo sapiens histidine-rich glycoprotein (HRG), mRNA OS=Homo sapiens OX=9606 PE=2 SV=1	32	16	69	16	1	525	59.5	7.44	211.25	16	0	3.8194e+07	4.92817e+07	6.994e+07	6.46455e+07	3.7377e+07	7.26672e+07
B4DPQ0	C1R	Complement C1r subcomponent OS=Homo sapiens OX=9606 GN=C1R PE=1 SV=1	38	18	61	18	1	719	81.8	6.37	210.68	18	0	9.39847e+06	6.56553e+07	2.3104e+07	3.14148e+07	3.02632e+07	1.97807e+07
O75923	DYSF	Dysferlin OS=Homo sapiens OX=9606 GN=DYSF PE=1 SV=1	20	29	68	28	1	2080	237.1	5.64	210.3	29	0	4.37613e+07	2.65552e+07	2.03305e+07	3.35675e+07	2.13078e+07	2.95916e+07
Q00839	HNRNPU	Heterogeneous nuclear ribonucleoprotein U OS=Homo sapiens OX=9606 GN=HNRNPU PE=1 SV=6	31	20	64	20	1	825	90.5	6	209.73	20	0	1.60666e+07	1.02126e+08	2.72244e+07	4.90604e+07	4.03317e+07	1.91457e+07
V9HWE9	HEL-S-22	Epididymis secretory protein Li 22 OS=Homo sapiens OX=9606 GN=HEL-S-22 PE=2 SV=1	64	9	58	9	1	210	23.3	5.64	209.09	9	0	5.20159e+07	6.16601e+07	5.7982e+07	6.9207e+07	1.33375e+08	5.21951e+07
Q9H0U4	RAB1B	Ras-related protein Rab-1B OS=Homo sapiens OX=9606 GN=RAB1B PE=1 SV=1	72	11	70	5	1	201	22.2	5.73	208.95	11	5	6.01258e+07	5.77151e+07	5.64377e+07	7.47044e+07	4.45769e+07	6.89646e+07
P55795	HNRNPH2	Heterogeneous nuclear ribonucleoprotein H2 OS=Homo sapiens OX=9606 GN=HNRNPH2 PE=1 SV=1	38	12	63	7	1	449	49.2	6.3	208.65	12	0	2.32264e+06	9.25217e+06	1.60242e+06	3.49784e+06	1.28078e+07	5.24376e+06
P02461	COL3A1	Collagen alpha-1(III) chain OS=Homo sapiens OX=9606 GN=COL3A1 PE=1 SV=4	11	15	61	15	1	1466	138.5	6.61	208.37	15	0	3.06467e+07	1.25952e+08	3.32919e+07	4.72929e+07	4.77019e+07	4.02466e+07
P07195	LDHB	L-lactate dehydrogenase B chain OS=Homo sapiens OX=9606 GN=LDHB PE=1 SV=2	43	15	66	14	1	334	36.6	6.05	207.02	15	1	1.45597e+08	2.1567e+08	1.05174e+08	1.24171e+08	243007604	1.39026e+08
B2R950	#N/A	cDNA, FLJ94213, highly similar to Homo sapiens pregnancy-zone protein (PZP), mRNA OS=Homo sapiens OX=9606 PE=2 SV=1	15	15	76	9	1	1482	163.8	6.38	206.8	15	0	984419	209813	6.48205e+06	5.77546e+06	304673	479642
P04792	HSPB1	Heat shock protein beta-1 OS=Homo sapiens OX=9606 GN=HSPB1 PE=1 SV=2	91	13	62	13	1	205	22.8	6.4	204.9	13	0	9.20322e+06	7.23151e+07	2.21411e+07	3.82238e+07	1.1794e+08	7.21664e+07
Q01469	FABP5	Fatty acid-binding protein 5 OS=Homo sapiens OX=9606 GN=FABP5 PE=1 SV=3	71	12	57	12	1	135	15.2	7.01	204.09	12	0	7.78464e+06	5.45919e+07	5.96508e+06	2.71172e+07	8.07176e+07	5.61059e+07
B3KS79	#N/A	cDNA FLJ35730 fis, clone TESTI2003131, highly similar to ALPHA-1-ANTICHYMOTRYPSIN OS=Homo sapiens OX=9606 PE=2 SV=1	28	15	63	15	1	448	50.6	5.63	203.56	15	0	1.37503e+07	1.80617e+08	4.57038e+07	1.24672e+08	4.99919e+07	2.42198e+07
P78527	PRKDC	DNA-dependent protein kinase catalytic subunit OS=Homo sapiens OX=9606 GN=PRKDC PE=1 SV=3	10	34	69	34	1	4128	468.8	7.12	201.95	34	0	1.82333e+07	4.9275e+07	1.22079e+07	2.57277e+07	3.01583e+07	2.12261e+07
A0A024R4A0	NCL	Nucleolin, isoform CRA_b OS=Homo sapiens OX=9606 GN=NCL PE=4 SV=1	34	18	63	18	1	710	76.6	4.7	201.76	18	0	1.86879e+07	1.10155e+08	1.75643e+07	2.95868e+07	6.17395e+07	2.72052e+07
P59665	DEFA1	Neutrophil defensin 1 OS=Homo sapiens OX=9606 GN=DEFA1 PE=1 SV=1	27	6	80	6	1	94	10.2	6.99	201.44	6	0	33951098735	1466146163	14614232136	16886238779	7139364239	23596720041
P13797	PLS3	Plastin-3 OS=Homo sapiens OX=9606 GN=PLS3 PE=1 SV=4	35	17	63	12	1	630	70.8	5.6	200.27	17	0	2.22764e+06	2.84303e+07	6.91174e+06	4.49788e+06	2.26763e+07	9.24443e+06
Q59E93	#N/A	Aminopeptidase (Fragment) OS=Homo sapiens OX=9606 PE=2 SV=1	23	22	68	22	1	977	110.5	5.53	200.24	22	0	3.16212e+07	4.96846e+07	1.9195e+07	3.177e+07	3.42862e+07	3.16314e+07
P05556	ITGB1	Integrin beta-1 OS=Homo sapiens OX=9606 GN=ITGB1 PE=1 SV=2	27	16	60	16	1	798	88.4	5.39	199.83	16	0	1.1102e+07	4.32601e+07	1.34393e+07	2.20635e+07	4.01853e+07	3.84038e+07
P61626	LYZ	Lysozyme C OS=Homo sapiens OX=9606 GN=LYZ PE=1 SV=1	57	9	59	9	1	148	16.5	9.16	199.53	9	0	7.28816e+08	8.01961e+07	2.8195e+08	2.01959e+08	2.42475e+08	4.11395e+08
A0A0U1RRH7	#N/A	Histone H2A OS=Homo sapiens OX=9606 PE=3 SV=1	27	6	69	2	1	170	18.5	11.52	199.3	6	4	1.87281e+08	1028518391	1.87389e+08	4.547e+08	4.81309e+08	1.91736e+08
P48735	IDH2	Isocitrate dehydrogenase [NADP], mitochondrial OS=Homo sapiens OX=9606 GN=IDH2 PE=1 SV=2	43	17	62	16	1	452	50.9	8.69	198.89	17	1	1.3729e+07	5.5753e+07	1.79867e+07	3.60958e+07	3.56555e+07	2.09565e+07
P28676	GCA	Grancalcin OS=Homo sapiens OX=9606 GN=GCA PE=1 SV=2	43	8	56	8	1	217	24	5.21	198.47	8	0	1.18493e+08	5.86003e+06	3.26931e+07	7.5984e+07	3.37428e+07	4.94281e+07
Q15113	PCOLCE	Procollagen C-endopeptidase enhancer 1 OS=Homo sapiens OX=9606 GN=PCOLCE PE=1 SV=2	35	10	61	10	1	449	47.9	7.43	198.13	10	0	1.32642e+07	1.0678e+08	3.40585e+07	3.39909e+07	3.58753e+07	3.56855e+07
A0A384MDV8	#N/A	Epididymis secretory sperm binding protein OS=Homo sapiens OX=9606 PE=2 SV=1	24	12	65	12	1	500	55.2	6.55	195.85	12	0	1.63515e+07	5.12175e+07	3.316e+07	4.63033e+07	2.44041e+07	1.8393e+07
A0A024R4K3	MDH2	Malate dehydrogenase OS=Homo sapiens OX=9606 GN=MDH2 PE=2 SV=1	46	12	56	12	1	338	35.5	8.68	192.78	12	0	1.57683e+07	8.4593e+07	2.48053e+07	3.83259e+07	6.13192e+07	2.92656e+07
Q9NZM1	MYOF	Myoferlin OS=Homo sapiens OX=9606 GN=MYOF PE=1 SV=1	21	32	60	31	1	2061	234.6	6.18	192.46	32	1	4.30793e+06	5.46573e+07	7.69817e+06	1.87543e+07	2.65447e+07	1.66827e+07
A0A3B3ITK0	THBS2	Thrombospondin-2 OS=Homo sapiens OX=9606 GN=THBS2 PE=4 SV=1	20	19	56	18	1	1177	130.4	4.83	191.48	19	0	614980	5.6148e+07	1.35566e+07	2.82438e+06	4.57874e+07	4.83602e+06
A0A384ME17	TUFM	Epididymis secretory sperm binding protein OS=Homo sapiens OX=9606 GN=TUFM PE=2 SV=1	37	13	54	13	1	455	49.8	7.61	191.36	13	0	8.87531e+06	5.8611e+07	1.21136e+07	2.50874e+07	2.55636e+07	1.1493e+07
P80723	BASP1	Brain acid soluble protein 1 OS=Homo sapiens OX=9606 GN=BASP1 PE=1 SV=2	69	7	44	7	1	227	22.7	4.63	190.67	7	0	6.84861e+07	3.09696e+07	2.81795e+07	2.01791e+07	1.44743e+08	5.74215e+07
P37802	TAGLN2	Transgelin-2 OS=Homo sapiens OX=9606 GN=TAGLN2 PE=1 SV=3	61	11	63	11	1	199	22.4	8.25	190.45	11	0	3.87883e+07	1.50657e+08	8.69006e+07	6.56386e+07	1.91345e+08	7.50755e+07
Q8IUX7	AEBP1	Adipocyte enhancer-binding protein 1 OS=Homo sapiens OX=9606 GN=AEBP1 PE=1 SV=1	23	19	58	19	1	1158	130.8	5.11	189.7	19	0	1.1539e+07	9.09052e+07	2.25255e+07	2.70591e+07	6.41522e+07	2.40502e+07
Q01995	TAGLN	Transgelin OS=Homo sapiens OX=9606 GN=TAGLN PE=1 SV=4	76	15	63	15	1	201	22.6	8.84	187.93	15	0	1.65336e+07	1.66899e+08	3.8583e+07	2.14742e+07	3.19708e+08	7.19011e+07
P04843	RPN1	Dolichyl-diphosphooligosaccharide--protein glycosyltransferase subunit 1 OS=Homo sapiens OX=9606 GN=RPN1 PE=1 SV=1	45	19	63	19	1	607	68.5	6.38	187.85	19	0	9.39536e+06	9.28366e+07	2.33991e+07	3.8391e+07	1.859e+07	2.41028e+07
P08575	PTPRC	Receptor-type tyrosine-protein phosphatase C OS=Homo sapiens OX=9606 GN=PTPRC PE=1 SV=3	21	22	62	22	1	1306	147.4	6.15	186.59	22	0	3.90323e+07	1.23652e+07	2.00839e+07	2.38836e+07	2.05562e+07	3.25645e+07
P30041	PRDX6	Peroxiredoxin-6 OS=Homo sapiens OX=9606 GN=PRDX6 PE=1 SV=3	67	13	56	13	1	224	25	6.38	185.39	13	0	2.92563e+07	5.87327e+07	3.07155e+07	3.2605e+07	5.82925e+07	4.31249e+07
P61160	ACTR2	Actin-related protein 2 OS=Homo sapiens OX=9606 GN=ACTR2 PE=1 SV=1	32	10	54	10	1	394	44.7	6.74	185.37	10	0	4.74456e+07	3.61476e+07	3.03943e+07	3.67221e+07	4.41657e+07	3.44028e+07
Q53XS4	PTPN6	Tyrosine-protein phosphatase non-receptor type OS=Homo sapiens OX=9606 GN=PTPN6 PE=2 SV=1	37	16	62	16	1	597	67.7	7.78	185.19	16	0	4.44969e+07	1.22899e+07	2.62364e+07	3.66941e+07	2.77318e+07	2.39457e+07
O15144	ARPC2	Actin-related protein 2/3 complex subunit 2 OS=Homo sapiens OX=9606 GN=ARPC2 PE=1 SV=1	53	15	65	15	1	300	34.3	7.36	183.53	15	0	9.1507e+07	5.89429e+07	5.96442e+07	6.57477e+07	8.58665e+07	6.95983e+07
P52790	HK3	Hexokinase-3 OS=Homo sapiens OX=9606 GN=HK3 PE=1 SV=2	21	15	52	15	1	923	99	5.4	181.98	15	0	2.04424e+07	2.68105e+06	1.36311e+07	2.46011e+07	1.78245e+07	1.2853e+07
Q08211	DHX9	ATP-dependent RNA helicase A OS=Homo sapiens OX=9606 GN=DHX9 PE=1 SV=4	22	21	57	21	1	1270	140.9	6.84	181.84	21	0	1.32039e+07	44642248	1.0147e+07	1.99301e+07	2.61864e+07	1.91316e+07
A0A024R0V4	VASP	Vasodilator-stimulated phosphoprotein isoform 1 OS=Homo sapiens OX=9606 GN=VASP PE=2 SV=1	40	12	58	12	1	380	39.8	8.94	180.95	12	0	2.34927e+07	2.33321e+07	1.50051e+07	2.53587e+07	3.3255e+07	2.04501e+07
V9HW98	HEL2	Epididymis luminal protein 2 OS=Homo sapiens OX=9606 GN=HEL2 PE=1 SV=1	49	11	58	9	1	255	29.2	4.74	179.63	11	0	2.66657e+07	6.36323e+07	2.33504e+07	3.27309e+07	6.91706e+07	3.43342e+07
V9HW21	HEL-76	Epididymis luminal protein 76 OS=Homo sapiens OX=9606 GN=HEL-76 PE=2 SV=1	51	10	54	10	1	260	29.2	7.4	179	10	0	4.17893e+07	9.13424e+07	2.3092e+07	5.30988e+07	3.9521e+07	7.82901e+07
Q15365	PCBP1	Poly(rC)-binding protein 1 OS=Homo sapiens OX=9606 GN=PCBP1 PE=1 SV=2	54	11	57	9	1	356	37.5	7.09	178.99	11	2	3.63761e+07	8.51091e+07	3.92658e+07	5.39153e+07	6.33887e+07	5.45528e+07
Q9HDC9	APMAP	Adipocyte plasma membrane-associated protein OS=Homo sapiens OX=9606 GN=APMAP PE=1 SV=2	49	16	61	16	1	416	46.5	6.16	177.54	16	0	1.13759e+08	2.74727e+07	3.99947e+07	7.7858e+07	5.30493e+07	7.28677e+07
Q13162	PRDX4	Peroxiredoxin-4 OS=Homo sapiens OX=9606 GN=PRDX4 PE=1 SV=1	62	12	55	10	1	271	30.5	6.29	177.22	12	0	1.2499e+07	4.4588e+07	1.97079e+07	2.20804e+07	2.15324e+07	1.50313e+07
E9KL48	GLUD1	Epididymis secretory sperm binding protein OS=Homo sapiens OX=9606 GN=GLUD1 PE=2 SV=1	37	15	52	15	1	558	61.4	7.8	177.08	15	0	8.36799e+06	6.17898e+07	1.4369e+07	2.91638e+07	4.11378e+07	1.79262e+07
P08697	SERPINF2	Alpha-2-antiplasmin OS=Homo sapiens OX=9606 GN=SERPINF2 PE=1 SV=3	32	11	53	11	1	491	54.5	6.29	176.98	11	0	3.59475e+07	1.73448e+07	5.73505e+07	5.3741e+07	8.90103e+06	4.36361e+07
A0A0S2Z4L3	PROS1	Protein S isoform 2 (Fragment) OS=Homo sapiens OX=9606 GN=PROS1 PE=2 SV=1	23	13	56	13	1	708	78.8	5.74	176.93	13	0	1.82067e+07	2.88277e+07	2.02799e+07	3.96932e+07	4.93735e+06	2.97859e+07
A0A024RAL1	CSPG2	Chondroitin sulfate proteoglycan 2 (Versican), isoform CRA_c OS=Homo sapiens OX=9606 GN=CSPG2 PE=4 SV=1	10	20	54	2	1	2409	264.9	4.54	176.58	20	16	1.06198e+07	1.28206e+08	3.03106e+07	1.91569e+07	3.66816e+07	2.91836e+07
P39060	COL18A1	Collagen alpha-1(XVIII) chain OS=Homo sapiens OX=9606 GN=COL18A1 PE=1 SV=5	10	13	55	13	1	1754	178.1	6.01	176.13	13	0	2.34857e+07	8.94802e+07	2.38353e+07	4.24493e+07	1.23048e+08	7.65755e+07
Q14315	FLNC	Filamin-C OS=Homo sapiens OX=9606 GN=FLNC PE=1 SV=3	9	17	50	10	1	2725	290.8	5.97	175.7	17	0	NA	4.19557e+06	1.27018e+06	1.08142e+06	8.44209e+06	1.60607e+06
Q07954	LRP1	Prolow-density lipoprotein receptor-related protein 1 OS=Homo sapiens OX=9606 GN=LRP1 PE=1 SV=2	11	35	61	35	1	4544	504.3	5.39	175.25	35	0	2.54013e+06	3.06427e+07	5.87811e+06	8.61679e+06	2.94104e+07	1.04353e+07
B2R6J2	#N/A	cDNA, FLJ92973, highly similar to Homo sapiens villin 2 (ezrin) (VIL2), mRNA OS=Homo sapiens OX=9606 PE=2 SV=1	24	14	72	6	1	586	69.4	6.27	175.09	14	0	2.66495e+06	6.12138e+06	1.1563e+06	2.66274e+06	4.10834e+06	3.29812e+06
P07339	CTSD	Cathepsin D OS=Homo sapiens OX=9606 GN=CTSD PE=1 SV=1	38	13	61	13	1	412	44.5	6.54	174.94	13	0	1.44455e+07	6.60632e+07	2.707e+07	2.37713e+07	4.78272e+07	3.12042e+07
A0A024RB87	RAP1B	RAP1B, member of RAS oncogene family, isoform CRA_a OS=Homo sapiens OX=9606 GN=RAP1B PE=4 SV=1	49	10	58	3	1	184	20.8	5.78	174.91	10	7	5.48035e+07	5.40213e+07	3.68519e+07	6.04039e+07	3.95243e+07	7.8768e+07
Q6LES2	ANXA4	Annexin (Fragment) OS=Homo sapiens OX=9606 GN=ANXA4 PE=2 SV=1	45	13	54	13	1	321	36.1	6.13	173.97	13	0	2.77638e+07	2.5318e+07	1.58164e+07	2.65244e+07	4.86132e+07	4.41835e+07
P17987	TCP1	T-complex protein 1 subunit alpha OS=Homo sapiens OX=9606 GN=TCP1 PE=1 SV=1	39	18	60	18	1	556	60.3	6.11	172.7	18	0	1.54729e+07	4.55764e+07	9.22028e+06	2.44154e+07	2.02308e+07	2.20535e+07
P04839	CYBB	Cytochrome b-245 heavy chain OS=Homo sapiens OX=9606 GN=CYBB PE=1 SV=2	19	12	50	12	1	570	65.3	8.63	172.19	12	0	6.82533e+07	1.02867e+07	2.88708e+07	5.39738e+07	2.73312e+07	3.57618e+07
P62834	RAP1A	Ras-related protein Rap-1A OS=Homo sapiens OX=9606 GN=RAP1A PE=1 SV=1	49	9	57	2	1	184	21	6.67	170.43	9	0	6.04025e+06	2.63226e+06	4.82686e+06	5560858	4.20607e+06	5.83499e+06
P52566	ARHGDIB	Rho GDP-dissociation inhibitor 2 OS=Homo sapiens OX=9606 GN=ARHGDIB PE=1 SV=3	68	8	42	8	1	201	23	5.21	170.23	8	0	4.56036e+07	2.94668e+07	3.77401e+07	4.47251e+07	8.18789e+07	3.95573e+07
P17213	BPI	Bactericidal permeability-increasing protein OS=Homo sapiens OX=9606 GN=BPI PE=1 SV=4	27	10	56	10	1	487	53.9	9.38	169.49	10	0	8.23882e+07	2.46653e+06	2.26499e+07	2.21178e+07	8.7826e+07	1.32548e+08
A0A2R8Y7X9	#N/A	Uncharacterized protein OS=Homo sapiens OX=9606 PE=3 SV=1	63	11	56	10	1	168	18.4	6.96	169.15	11	0	7.36891e+06	1.13045e+07	3.83981e+07	7.08307e+07	5.15313e+07	1.34402e+08
P15924	DSP	Desmoplakin OS=Homo sapiens OX=9606 GN=DSP PE=1 SV=3	19	43	55	43	1	2871	331.6	6.81	167.65	43	0	1.3308e+06	7.92148e+06	65766	5.64649e+06	6.1866e+06	1.39111e+08
B2R9S4	#N/A	cDNA, FLJ94534, highly similar to Homo sapiens capping protein (actin filament), gelsolin-like(CAPG), mRNA OS=Homo sapiens OX=9606 PE=2 SV=1	45	9	49	9	1	348	38.5	6.37	167.25	9	0	3.86864e+07	3.61266e+07	3.76928e+07	2.67219e+07	6.06299e+07	3.75977e+07
Q15942	ZYX	Zyxin OS=Homo sapiens OX=9606 GN=ZYX PE=1 SV=1	31	11	57	11	1	572	61.2	6.67	166.9	11	0	2.78798e+07	4.08366e+07	2.61103e+07	3.30966e+07	5.13055e+07	3.77595e+07
A0A024RDF3	HNRPD	Heterogeneous nuclear ribonucleoprotein D (AU-rich element RNA binding protein 1, 37kDa), isoform CRA_d OS=Homo sapiens OX=9606 GN=HNRPD PE=4 SV=1	29	10	54	8	1	355	38.4	7.81	165.41	10	2	1.17849e+07	7.29989e+07	1.07682e+07	1.66169e+07	3.16119e+07	1.66441e+07
P11940	PABPC1	Polyadenylate-binding protein 1 OS=Homo sapiens OX=9606 GN=PABPC1 PE=1 SV=2	24	13	51	8	1	636	70.6	9.5	164.77	13	5	5.75148e+06	3.95248e+07	7.08167e+06	1.56848e+07	1.94374e+07	7.41461e+06
B2RWM5	CNN2	Calponin 2 (Fragment) OS=Homo sapiens OX=9606 GN=CNN2 PE=2 SV=1	42	10	51	9	1	308	33.6	7.33	164.5	10	1	1.77859e+07	30610705	1.86948e+07	1.96483e+07	3.27018e+07	1.97694e+07
Q6N091	DKFZp686C02220	Uncharacterized protein DKFZp686C02220 (Fragment) OS=Homo sapiens OX=9606 GN=DKFZp686C02220 PE=2 SV=1	32	10	48	4	1	500	54.1	6.34	164.01	10	0	1.76219e+06	3.52727e+06	7.61272e+06	5.24651e+06	7.06277e+06	2.38244e+06
P02743	APCS	Serum amyloid P-component OS=Homo sapiens OX=9606 GN=APCS PE=1 SV=2	31	8	52	8	1	223	25.4	6.54	163.82	8	0	7.77565e+07	1.04648e+08	1.3233e+08	1.20675e+08	3.79745e+08	3.63993e+08
Q86UX7	FERMT3	Fermitin family homolog 3 OS=Homo sapiens OX=9606 GN=FERMT3 PE=1 SV=1	39	19	51	19	1	667	75.9	6.98	163.79	19	0	2.35159e+07	1.98099e+07	2.24129e+07	3.67268e+07	2.55336e+07	3.83342e+07
P06748	NPM1	Nucleophosmin OS=Homo sapiens OX=9606 GN=NPM1 PE=1 SV=2	29	5	37	5	1	294	32.6	4.78	162.6	5	0	2.66582e+07	7.6684e+07	2.74061e+07	3.21479e+07	8.45695e+07	4.61633e+07
A0A024R882	STOM	Stomatin, isoform CRA_a OS=Homo sapiens OX=9606 GN=STOM PE=4 SV=1	33	10	53	10	1	288	31.7	7.88	162.47	10	0	1.65736e+08	8.06542e+07	7.50594e+07	179495986	1.46672e+08	1.41809e+08
P12956	XRCC6	X-ray repair cross-complementing protein 6 OS=Homo sapiens OX=9606 GN=XRCC6 PE=1 SV=2	23	12	54	12	1	609	69.8	6.64	162.22	12	0	1.16474e+07	5.62624e+07	1.93389e+07	17760725	3.53476e+07	2.32155e+07
P51991	HNRNPA3	Heterogeneous nuclear ribonucleoprotein A3 OS=Homo sapiens OX=9606 GN=HNRNPA3 PE=1 SV=2	43	15	46	2	1	378	39.6	9.01	161.94	15	12	4.98553e+06	5.10705e+07	9.22705e+06	2.0875e+07	2.64154e+07	8.00742e+06
O43866	CD5L	CD5 antigen-like OS=Homo sapiens OX=9606 GN=CD5L PE=1 SV=1	47	11	46	11	1	347	38.1	5.47	161.68	11	0	1.84302e+07	3.1056e+07	2.90731e+07	2.89545e+07	7.89964e+06	1.2109e+07
G3GAU4	#N/A	Anti-H1N1 influenza HA kappa chain variable region (Fragment) OS=Homo sapiens OX=9606 PE=2 SV=1	47	3	45	2	1	107	11.6	7.96	161.43	3	0	4.55981e+07	7.50108e+07	1.81728e+08	1.6506e+08	7.25446e+07	4.25145e+07
P53621	COPA	Coatomer subunit alpha OS=Homo sapiens OX=9606 GN=COPA PE=1 SV=2	25	23	56	23	1	1224	138.3	7.66	160.81	23	0	1.80347e+07	5.91238e+07	2.73356e+07	3.47935e+07	3.18654e+07	2.11745e+07
Q9UL91	#N/A	Myosin-reactive immunoglobulin heavy chain variable region (Fragment) OS=Homo sapiens OX=9606 PE=2 SV=1	51	4	42	2	1	118	12.8	5.36	160.45	4	0	9.76212e+07	1.42503e+08	1.52175e+08	1.40123e+08	4.8646e+07	3.07011e+07
E7EPK1	43715	Septin-7 OS=Homo sapiens OX=9606 GN=SEPT7 PE=1 SV=2	40	14	52	13	1	437	50.7	8.63	160.4	14	1	9.15946e+06	5.67135e+07	1.42759e+07	1.95055e+07	4.31313e+07	2.23343e+07
A0A090N8Y2	ERP70	Protein disulfide-isomerase A4 OS=Homo sapiens OX=9606 GN=ERP70 PE=2 SV=1	29	16	62	16	1	645	72.9	5.07	160.09	16	0	1.17662e+07	6.948e+07	1.75422e+07	3.25132e+07	3.7236e+07	1.41015e+07
Q9Y3Z3	SAMHD1	Deoxynucleoside triphosphate triphosphohydrolase SAMHD1 OS=Homo sapiens OX=9606 GN=SAMHD1 PE=1 SV=2	40	18	51	18	1	626	72.2	7.14	159.38	18	0	8.31644e+06	3.57927e+07	1.69784e+07	2.69231e+07	3.51708e+07	2.31436e+07
J3KNB4	CAMP	Cathelicidin antimicrobial peptide OS=Homo sapiens OX=9606 GN=CAMP PE=1 SV=1	31	9	52	9	1	173	19.6	9.41	157.04	9	0	213103372	4.87345e+06	6.89496e+07	7.45883e+07	4.08837e+07	7.52685e+07
P50990	CCT8	T-complex protein 1 subunit theta OS=Homo sapiens OX=9606 GN=CCT8 PE=1 SV=4	38	17	52	17	1	548	59.6	5.6	156.59	17	0	2.08653e+07	6.65765e+07	1.87702e+07	3.95193e+07	4.02498e+07	3.77387e+07
B3KNX0	#N/A	cDNA FLJ30621 fis, clone CTONG2001681, highly similar to Complement C1s subcomponent OS=Homo sapiens OX=9606 PE=2 SV=1	30	14	45	14	1	688	76.6	4.96	155.19	14	0	1.38688e+07	4.77497e+07	2.34304e+07	3.20675e+07	3.18308e+07	2.54726e+07
P37837	TALDO1	Transaldolase OS=Homo sapiens OX=9606 GN=TALDO1 PE=1 SV=2	32	10	56	10	1	337	37.5	6.81	154.66	10	0	161055744	5.811e+07	8.21634e+07	4.98518e+07	9.96064e+07	6.6339e+07
A0A024R1P2	RAC2	Ras-related C3 botulinum toxin substrate 2 (Rho family, small GTP binding protein Rac2), isoform CRA_a OS=Homo sapiens OX=9606 GN=RAC2 PE=4 SV=1	45	9	53	5	1	192	21.4	7.61	153.61	9	4	1.58624e+08	9.09948e+07	1.35947e+08	1.82773e+08	9.38455e+07	1.19828e+08
A0A024RDL1	CCT6A	Chaperonin containing TCP1, subunit 6A (Zeta 1), isoform CRA_a OS=Homo sapiens OX=9606 GN=CCT6A PE=3 SV=1	31	13	47	11	1	531	58	6.68	151.07	13	2	1.69343e+07	5.15996e+07	1.39546e+07	3.21531e+07	3.30186e+07	3.64257e+07
A8K2T4	#N/A	cDNA FLJ78207, highly similar to Human complement protein component C7 mRNA OS=Homo sapiens OX=9606 PE=2 SV=1	29	15	45	15	1	843	93.3	6.51	150.84	15	0	1.66867e+07	9.40281e+06	3.23658e+07	2.63994e+07	1.76109e+07	3.65155e+07
A0A0S2Z4F1	EFEMP1	EGF containing fibulin-like extracellular matrix protein 1 isoform 1 (Fragment) OS=Homo sapiens OX=9606 GN=EFEMP1 PE=2 SV=1	34	12	47	12	1	493	54.6	5.07	150.69	12	0	1.70152e+07	2.63897e+07	3.71034e+07	20315131	2.51e+07	2.63776e+07
A0A0D6E067	HLA-A	MHC class I antigen OS=Homo sapiens OX=9606 GN=HLA-A PE=3 SV=1	32	9	42	2	1	365	40.9	6.3	150.15	9	3	2.50301e+06	4.57606e+06	950288	1.02976e+06	7.87175e+06	5.70463e+06
P52597	HNRNPF	Heterogeneous nuclear ribonucleoprotein F OS=Homo sapiens OX=9606 GN=HNRNPF PE=1 SV=3	30	9	47	7	1	415	45.6	5.58	149.68	9	0	5.96873e+06	2.59363e+07	4.4764e+06	9.07796e+06	2.1733e+07	8.56173e+06
P07358	C8B	Complement component C8 beta chain OS=Homo sapiens OX=9606 GN=C8B PE=1 SV=3	37	16	47	16	1	591	67	8.13	148.92	16	0	2.11528e+07	1.16105e+07	3.50206e+07	3.11874e+07	1.74324e+07	3.38551e+07
V9HW92	HEL-S-112	Epididymis secretory protein Li 112 OS=Homo sapiens OX=9606 GN=HEL-S-112 PE=2 SV=1	76	15	44	15	1	329	36	7.02	148.88	15	0	5.88908e+06	5.84371e+07	1.5082e+07	1.84966e+07	2.9646e+07	1.64668e+07
A0A384NPU5	#N/A	Epididymis secretory sperm binding protein OS=Homo sapiens OX=9606 PE=2 SV=1	28	11	46	11	1	440	48.1	5.08	148.36	11	0	1.4731e+07	7.32796e+07	2.3134e+07	4.53925e+07	4.6521e+07	2.78435e+07
Q5U0I6	RAB1A	H.sapiens ras-related Hrab1A protein OS=Homo sapiens OX=9606 GN=RAB1A PE=2 SV=1	54	8	48	2	1	205	22.7	6.21	147.81	8	0	819511	2.61237e+06	1.09909e+06	1.82742e+06	1.51018e+06	1.86454e+06
P19652	ORM2	Alpha-1-acid glycoprotein 2 OS=Homo sapiens OX=9606 GN=ORM2 PE=1 SV=2	29	7	54	5	1	201	23.6	5.11	147.73	7	0	2.44196e+07	3.12741e+07	3.50411e+07	2.96815e+07	4.99695e+07	1.87902e+07
Q9Y678	COPG1	Coatomer subunit gamma-1 OS=Homo sapiens OX=9606 GN=COPG1 PE=1 SV=1	25	16	45	16	1	874	97.7	5.47	147.28	16	0	4.7376e+06	3.16869e+07	7.79574e+06	8.40147e+06	1.62181e+07	9.50542e+06
A0A024R6R4	MMP2	Matrix metallopeptidase 2 (Gelatinase A, 72kDa gelatinase, 72kDa type IV collagenase), isoform CRA_a OS=Homo sapiens OX=9606 GN=MMP2 PE=3 SV=1	39	22	49	22	1	660	73.8	5.47	146.93	22	0	1.79387e+06	3.09583e+07	1.89728e+06	4.78456e+06	1.42863e+08	1.44701e+07
P80511	S100A12	Protein S100-A12 OS=Homo sapiens OX=9606 GN=S100A12 PE=1 SV=2	34	3	35	3	1	92	10.6	6.25	146.68	3	0	1.27566e+08	6.19216e+06	1.92777e+07	11316809	8.97791e+07	4.71176e+07
P36955	SERPINF1	Pigment epithelium-derived factor OS=Homo sapiens OX=9606 GN=SERPINF1 PE=1 SV=4	34	13	52	13	1	418	46.3	6.38	146.13	13	0	1.93641e+07	1.4334e+08	3.5407e+07	4.06179e+07	7.27845e+07	3.27266e+07
A0A024R017	HIST1H2AC	Histone H2A OS=Homo sapiens OX=9606 GN=HIST1H2AC PE=3 SV=1	35	6	48	2	1	130	14.1	11.05	145.41	6	0	1.3627e+07	6.32698e+07	2.06993e+07	50914391	4.36273e+07	2.15648e+07
Q59FR8	#N/A	Galectin (Fragment) OS=Homo sapiens OX=9606 PE=2 SV=1	28	6	51	6	1	258	27.1	8.41	145.37	6	0	3.65982e+07	7.76326e+07	3.60847e+07	5.53312e+07	1.1933e+08	6.82837e+07
A0A384N6C7	#N/A	Epididymis secretory sperm binding protein OS=Homo sapiens OX=9606 PE=2 SV=1	28	10	38	10	1	589	64	8.27	145.31	10	0	6.92251e+06	3.48621e+07	1.07341e+07	1.56244e+07	2.49493e+07	9.77738e+06
A8K9A4	#N/A	cDNA FLJ75154, highly similar to Homo sapiens heterogeneous nuclear ribonucleoprotein C (C1/C2), mRNA OS=Homo sapiens OX=9606 PE=2 SV=1	27	10	49	10	1	306	33.6	5.14	145.17	10	0	1.71327e+07	7.84375e+07	1.61939e+07	2.99437e+07	3.56553e+07	2.38775e+07
A0A384NPX1	#N/A	Epididymis secretory sperm binding protein OS=Homo sapiens OX=9606 PE=2 SV=1	11	7	47	2	1	470	53.5	5.27	144.57	7	0	2.35759e+06	1.03098e+06	618865	1.92587e+06	4.72328e+06	1.43696e+06
A8K3C3	#N/A	T-complex protein 1 subunit delta OS=Homo sapiens OX=9606 PE=2 SV=1	34	15	50	14	1	539	57.9	7.83	143.7	15	1	1.20121e+07	4.61217e+07	8.63093e+06	2.20324e+07	2.52322e+07	2.19082e+07
Q07507	DPT	Dermatopontin OS=Homo sapiens OX=9606 GN=DPT PE=1 SV=2	46	8	41	8	1	201	24	4.82	140.87	8	0	9.0905e+06	4.55528e+07	5.10254e+06	2.39447e+07	525267861	1.61829e+08
A0A024QZN9	VDAC2	Voltage-dependent anion channel 2, isoform CRA_a OS=Homo sapiens OX=9606 GN=VDAC2 PE=4 SV=1	42	11	45	11	1	319	34.5	7.99	140.84	11	0	1.8162e+07	6.22505e+07	1.41531e+07	3.50313e+07	3.13044e+07	4.42372e+07
A0A0S2Z3L2	ATP2A2	ATPase Ca++ transporting cardiac muscle slow twitch 2 isoform 1 (Fragment) OS=Homo sapiens OX=9606 GN=ATP2A2 PE=2 SV=1	15	12	45	8	1	1042	114.7	5.34	140.25	12	4	9.94058e+06	3.13586e+07	1.35863e+07	2.0268e+07	2.59352e+07	1.71446e+07
A8K4Z4	#N/A	60S acidic ribosomal protein P0 OS=Homo sapiens OX=9606 PE=2 SV=1	45	12	38	12	1	317	34.2	5.97	140.2	12	0	1.06871e+07	9.86442e+07	2.53268e+07	3.52617e+07	2.95187e+07	2.44022e+07
B2RE46	#N/A	cDNA, FLJ96923, highly similar to Homo sapiens ribophorin II (RPN2), mRNA OS=Homo sapiens OX=9606 PE=2 SV=1	26	11	35	9	1	631	69.3	5.78	140.18	11	2	5.07449e+06	3.94232e+07	7.36758e+06	1.3669e+07	1.13129e+07	7.39314e+06
B2RBL3	#N/A	Thymidine phosphorylase OS=Homo sapiens OX=9606 PE=2 SV=1	32	14	46	14	1	482	49.9	5.53	139.58	14	0	9.92821e+06	3.52841e+07	3.86036e+07	2.69084e+07	4.06534e+07	2.66647e+07
A0A024R0S6	EHD2	EH-domain containing 2, isoform CRA_a OS=Homo sapiens OX=9606 GN=EHD2 PE=3 SV=1	47	19	50	17	1	543	61.1	6.46	139.27	19	2	7.68009e+06	5.09285e+07	1.04663e+07	1.53526e+07	9.07398e+07	4.45961e+07
Q59F14	#N/A	Neutrophil cytosol factor 2 variant (Fragment) OS=Homo sapiens OX=9606 PE=4 SV=1	26	14	42	14	1	598	67.5	6.21	138.99	14	0	3.74507e+07	1.44655e+06	1.96133e+07	2.72413e+07	1.73604e+07	1.25911e+07
P02750	LRG1	Leucine-rich alpha-2-glycoprotein OS=Homo sapiens OX=9606 GN=LRG1 PE=1 SV=2	33	9	48	9	1	347	38.2	6.95	138.85	9	0	2.61393e+07	2.82934e+07	2.48437e+07	3.02776e+07	4.44185e+07	1.58243e+07
P51149	RAB7A	Ras-related protein Rab-7a OS=Homo sapiens OX=9606 GN=RAB7A PE=1 SV=1	66	11	43	11	1	207	23.5	6.7	138.69	11	0	2.3539e+07	3.7431e+07	2.70143e+07	4.1106e+07	5.4843e+07	2.54179e+07
B7Z3K9	#N/A	Fructose-bisphosphate aldolase OS=Homo sapiens OX=9606 PE=2 SV=1	22	6	33	5	1	451	48.4	8.07	138.27	6	0	3.2769e+06	4.55348e+06	1.96081e+06	773765	1.28187e+07	3.75115e+06
V9HWC2	HEL-S-67p	Epididymis secretory sperm binding protein Li 67p OS=Homo sapiens OX=9606 GN=HEL-S-67p PE=2 SV=1	63	8	39	8	1	189	19.9	6.79	138.26	8	0	2.18776e+07	3.97107e+07	2.74404e+07	2.20966e+07	6.01572e+07	2.00062e+07
P27348	YWHAQ	14-3-3 protein theta OS=Homo sapiens OX=9606 GN=YWHAQ PE=1 SV=1	31	10	43	8	1	245	27.7	4.78	138.16	10	0	8.99889e+06	3.17086e+07	1.27466e+07	1.29615e+07	1.74233e+07	1.2715e+07
Q59F66	#N/A	DEAD box polypeptide 17 isoform p82 variant (Fragment) OS=Homo sapiens OX=9606 PE=2 SV=1	26	17	47	12	1	737	81	7.93	136.44	17	5	6.89442e+06	4.27296e+07	1.21101e+07	2.3805e+07	2.15552e+07	1.14597e+07
O15511	ARPC5	Actin-related protein 2/3 complex subunit 5 OS=Homo sapiens OX=9606 GN=ARPC5 PE=1 SV=3	67	7	36	7	1	151	16.3	5.67	135.7	7	0	2.892e+07	3.18066e+07	1.54336e+07	2.62046e+07	3.43729e+07	3.02375e+07
A0A384P5G6	#N/A	Epididymis secretory sperm binding protein OS=Homo sapiens OX=9606 PE=2 SV=1	32	16	42	16	1	679	73.6	6.16	135.04	16	0	1.10459e+07	6.74456e+07	1.37849e+07	2.90642e+07	4.11142e+07	1.97329e+07
Q9UM07	PADI4	Protein-arginine deiminase type-4 OS=Homo sapiens OX=9606 GN=PADI4 PE=1 SV=2	29	13	45	13	1	663	74	6.58	134.93	13	0	5.12868e+07	2.71453e+06	1.80828e+07	2.45363e+07	3.13374e+07	2.35503e+07
B2R774	#N/A	cDNA, FLJ93313, highly similar to Homo sapiens lectin, mannose-binding, 1 (LMAN1), mRNA OS=Homo sapiens OX=9606 PE=2 SV=1	31	10	43	10	1	510	57.5	6.77	134.3	10	0	4.16947e+07	5.08915e+07	5.05926e+07	7.94863e+07	3.87187e+07	1.96128e+08
A0A2R8Y5S7	RDX	Radixin OS=Homo sapiens OX=9606 GN=RDX PE=1 SV=1	21	12	58	2	1	590	69.3	6.27	134.1	12	0	492109	1.73256e+06	51676.3	210290	NA	NA
O75594	PGLYRP1	Peptidoglycan recognition protein 1 OS=Homo sapiens OX=9606 GN=PGLYRP1 PE=1 SV=1	37	4	32	4	1	196	21.7	8.59	133.37	4	0	7.2166e+07	5.06788e+06	3.87867e+07	2.27471e+07	5.2923e+07	4.99231e+07
O00159	MYO1C	Unconventional myosin-Ic OS=Homo sapiens OX=9606 GN=MYO1C PE=1 SV=4	24	20	47	20	1	1063	121.6	9.41	133.15	20	0	1.33889e+07	4.19967e+07	9.58617e+06	1.54998e+07	6.14987e+07	5.21227e+07
O60664	PLIN3	Perilipin-3 OS=Homo sapiens OX=9606 GN=PLIN3 PE=1 SV=3	48	12	36	12	1	434	47	5.44	133.14	12	0	1.10459e+07	5.38021e+07	2.8148e+07	2.28817e+07	5.4406e+07	1.53544e+07
E7EMB3	CALM2	Calmodulin-2 OS=Homo sapiens OX=9606 GN=CALM2 PE=1 SV=1	36	6	38	5	1	196	21.7	4.56	132.89	6	0	7.70025e+07	1.70089e+08	6.61065e+07	8.35291e+07	1.79823e+08	7.32821e+07
C9JF17	APOD	Apolipoprotein D (Fragment) OS=Homo sapiens OX=9606 GN=APOD PE=1 SV=1	26	8	43	8	1	215	24.1	5.6	132.47	8	0	4.85635e+07	4.46764e+07	3.22883e+07	3.40521e+07	4.43744e+07	5.09058e+07
A8K0T9	#N/A	cDNA FLJ75422, highly similar to Homo sapiens capping protein (actin filament) muscle Z-line, alpha 1, mRNA OS=Homo sapiens OX=9606 PE=2 SV=1	62	13	36	11	1	286	32.9	5.69	132.01	13	2	2.33933e+07	4.71799e+07	1.64316e+07	2.70849e+07	4.51092e+07	2.35895e+07
P05023	ATP1A1	Sodium/potassium-transporting ATPase subunit alpha-1 OS=Homo sapiens OX=9606 GN=ATP1A1 PE=1 SV=1	21	16	42	16	1	1023	112.8	5.49	131.84	16	0	1.45959e+07	4.19735e+07	1.35644e+07	2.802e+07	3.50609e+07	2.53766e+07
A0A024R5X2	hCG_2001986	HCG2001986, isoform CRA_a OS=Homo sapiens OX=9606 GN=hCG_2001986 PE=4 SV=1	32	10	35	10	1	450	49.9	9.11	131.73	10	0	1.68214e+07	2.13421e+07	7.08693e+06	1.87421e+07	1.20317e+07	9.25487e+06
Q15293	RCN1	Reticulocalbin-1 OS=Homo sapiens OX=9606 GN=RCN1 PE=1 SV=1	31	8	39	8	1	331	38.9	5	131.33	8	0	8.1054e+06	4.31679e+07	1.66629e+07	1.60854e+07	3.587e+07	1.4783e+07
Q96D15	RCN3	Reticulocalbin-3 OS=Homo sapiens OX=9606 GN=RCN3 PE=1 SV=1	46	9	34	9	1	328	37.5	4.89	130.85	9	0	1.05569e+07	6.75875e+07	2.35944e+07	1.34616e+07	2.79685e+07	1.03657e+07
Q6PCB0	VWA1	von Willebrand factor A domain-containing protein 1 OS=Homo sapiens OX=9606 GN=VWA1 PE=1 SV=1	33	9	33	9	1	445	46.8	7.68	130.53	9	0	2.08963e+06	4.5962e+07	5.24944e+06	2.26599e+07	3.3563e+07	1.02058e+07
D3DV26	S100A10	S100 calcium binding protein A10 (Annexin II ligand, calpactin I, light polypeptide (P11)), isoform CRA_b (Fragment) OS=Homo sapiens OX=9606 GN=S100A10 PE=4 SV=1	21	5	39	5	1	205	22.3	10.33	129.57	5	0	2.33421e+07	6.87949e+07	4.82763e+07	5.84607e+07	8.19332e+07	5.18947e+07
E9PRY8	EEF1D	Elongation factor 1-delta OS=Homo sapiens OX=9606 GN=EEF1D PE=1 SV=1	14	7	38	7	1	697	76.5	7.05	129.46	7	0	8.51175e+06	6.39277e+07	1.72999e+07	2.12018e+07	3.83628e+07	1.64268e+07
P39059	COL15A1	Collagen alpha-1(XV) chain OS=Homo sapiens OX=9606 GN=COL15A1 PE=1 SV=2	10	13	47	13	1	1388	141.6	5	128.98	13	0	17908954	5.68231e+07	1.75582e+07	2.93006e+07	3.01786e+07	3.06788e+07
A0A384N6B9	#N/A	Epididymis secretory sperm binding protein OS=Homo sapiens OX=9606 PE=2 SV=1	26	6	40	4	1	366	38.6	6.79	128.78	6	0	9.2482e+06	2.48838e+07	1.19361e+07	1.43985e+07	1.91844e+07	1.55919e+07
P06737	PYGL	Glycogen phosphorylase, liver form OS=Homo sapiens OX=9606 GN=PYGL PE=1 SV=4	24	17	48	15	1	847	97.1	7.17	128.71	17	2	3.0625e+07	9.45461e+06	6.62648e+06	2.25008e+07	2.83665e+07	1.50288e+07
A8K9T3	#N/A	cDNA FLJ76467, highly similar to Homo sapiens acyl-CoA synthetase long-chain family member 1 (ACSL1), mRNA OS=Homo sapiens OX=9606 PE=2 SV=1	28	16	46	16	1	698	77.9	7.18	128.51	16	0	2.38778e+07	6.96319e+06	1.26872e+07	1.70656e+07	5.89509e+07	2.43743e+07
P46777	RPL5	60S ribosomal protein L5 OS=Homo sapiens OX=9606 GN=RPL5 PE=1 SV=3	36	9	38	9	1	297	34.3	9.72	128.43	9	0	9.50435e+06	4.2287e+07	1.57442e+07	1.68747e+07	2.6312e+07	2.03807e+07
B4DEA8	#N/A	cDNA FLJ56425, highly similar to Very-long-chain specific acyl-CoAdehydrogenase, mitochondrial OS=Homo sapiens OX=9606 PE=2 SV=1	33	16	39	16	1	701	75.2	8.88	128.05	16	0	2.08909e+07	5.73684e+07	1.00003e+07	2.68119e+07	3.66477e+07	2.3046e+07
P23396	RPS3	40S ribosomal protein S3 OS=Homo sapiens OX=9606 GN=RPS3 PE=1 SV=2	47	10	43	10	1	243	26.7	9.66	127.34	10	0	1.71559e+07	7.79479e+07	2.32369e+07	3.03592e+07	3.15146e+07	3.40771e+07
E7EMK3	FLOT2	Flotillin-2 OS=Homo sapiens OX=9606 GN=FLOT2 PE=1 SV=1	31	12	42	12	1	483	53.1	5.24	127.18	12	0	3.29631e+07	4.15093e+07	1.44074e+07	3.54271e+07	4.57787e+07	3.22821e+07
P29966	MARCKS	Myristoylated alanine-rich C-kinase substrate OS=Homo sapiens OX=9606 GN=MARCKS PE=1 SV=4	26	5	32	5	1	332	31.5	4.45	127.15	5	0	4.70399e+06	2.15173e+07	9.97023e+06	1.31193e+07	1.11496e+07	7.83525e+06
Q53GF9	#N/A	Full-length cDNA 5-PRIME end of clone CS0DF013YM24 of Fetal brain of Homo sapiens (Human) variant (Fragment) OS=Homo sapiens OX=9606 PE=2 SV=1	41	9	40	9	1	225	25.6	6.7	126.61	9	0	1.42775e+07	4.89056e+07	1.53538e+07	2.9498e+07	2.22428e+07	2.03606e+07
J3QQX2	ARHGDIA	Rho GDP-dissociation inhibitor 1 OS=Homo sapiens OX=9606 GN=ARHGDIA PE=1 SV=1	17	4	35	4	1	235	25.8	7.44	126.35	4	0	3.04911e+07	3.66782e+07	2.94147e+07	2.24723e+07	7.84352e+07	3.31049e+07
A0A024R1K7	YWHAH	Tyrosine 3-monooxygenase/tryptophan 5-monooxygenase activation protein, eta polypeptide, isoform CRA_b OS=Homo sapiens OX=9606 GN=YWHAH PE=3 SV=1	43	13	42	11	1	246	28.2	4.84	126.27	13	2	1.24953e+07	6.69892e+07	8.52834e+06	1.62438e+07	1.95693e+07	9.7461e+06
P31930	UQCRC1	Cytochrome b-c1 complex subunit 1, mitochondrial OS=Homo sapiens OX=9606 GN=UQCRC1 PE=1 SV=3	35	11	36	11	1	480	52.6	6.37	126.08	11	0	7.56168e+06	2.0319e+07	8.86831e+06	1.70071e+07	2.35597e+07	1.79033e+07
Q16658	FSCN1	Fascin OS=Homo sapiens OX=9606 GN=FSCN1 PE=1 SV=3	39	12	41	12	1	493	54.5	7.24	125.73	12	0	7.68257e+06	6.86008e+07	1.91726e+07	1.57519e+07	6.02128e+07	2.86718e+07
A0A087X0X3	HNRNPM	Heterogeneous nuclear ribonucleoprotein M OS=Homo sapiens OX=9606 GN=HNRNPM PE=1 SV=1	30	16	41	16	1	730	77.5	8.78	125.57	16	0	1.68537e+07	6.10936e+07	1.85345e+07	29890960	4.23362e+07	3.34592e+07
A0A0C4DG17	RPSA	40S ribosomal protein SA OS=Homo sapiens OX=9606 GN=RPSA PE=1 SV=1	47	9	38	9	1	300	33.3	4.87	125.32	9	0	9.57476e+06	9.0421e+07	1.04954e+07	1.79401e+07	2.37625e+07	1.82406e+07
A0A024R3Q3	ARF1	ADP-ribosylation factor 1, isoform CRA_a OS=Homo sapiens OX=9606 GN=ARF1 PE=3 SV=1	47	9	36	5	1	181	20.7	6.8	125.13	9	0	2.41233e+07	2.1453e+07	1.87198e+07	1.80874e+07	2.13487e+07	2.89983e+07
J3KQE5	RAN	GTP-binding nuclear protein Ran (Fragment) OS=Homo sapiens OX=9606 GN=RAN PE=1 SV=1	35	6	37	6	1	234	26.8	9.58	124.42	6	0	2.1062e+07	5.09293e+07	2.36145e+07	3.41312e+07	4.539e+07	3.36764e+07
P28838	LAP3	Cytosol aminopeptidase OS=Homo sapiens OX=9606 GN=LAP3 PE=1 SV=3	40	15	37	15	1	519	56.1	7.93	123.47	15	0	2.80565e+06	2.22693e+07	8.6199e+06	1.30051e+07	2.21894e+07	9.32635e+06
Q6ICQ8	ARHG	ARHG protein (Fragment) OS=Homo sapiens OX=9606 GN=ARHG PE=2 SV=1	48	6	33	5	1	191	21.3	8.12	121.2	6	0	2.14669e+07	6.62842e+06	7.98727e+06	1.45587e+07	1.68726e+07	1.09703e+07
P21980	TGM2	Protein-glutamine gamma-glutamyltransferase 2 OS=Homo sapiens OX=9606 GN=TGM2 PE=1 SV=2	30	16	40	16	1	687	77.3	5.22	120.92	16	0	5.7125e+06	3.11763e+07	3.98112e+06	2.71446e+07	5.6958e+07	3.5964e+07
Q5TZP7	APEX1	DNA-(apurinic or apyrimidinic site) lyase OS=Homo sapiens OX=9606 GN=APEX1 PE=2 SV=1	50	8	31	8	1	318	35.5	8.12	120.9	8	0	7.09693e+06	1.29347e+07	5.0367e+06	4.1687e+06	9.56129e+06	4.82876e+06
A0A140VJE8	AP2B1	AP complex subunit beta OS=Homo sapiens OX=9606 GN=AP2B1 PE=2 SV=1	16	15	43	14	1	951	105.6	5.34	120.87	15	1	1.0631e+07	2.44249e+07	1.04554e+07	1.71576e+07	1.06529e+07	9.0922e+06
A2MYE1	#N/A	A30 (Fragment) OS=Homo sapiens OX=9606 PE=4 SV=1	54	5	34	3	1	96	10.4	8.5	120.62	5	3	2.48403e+07	4.20137e+07	124313924	7.38988e+07	2.94966e+07	2.04358e+07
A0A024R4E5	HDLBP	High density lipoprotein binding protein (Vigilin), isoform CRA_a OS=Homo sapiens OX=9606 GN=HDLBP PE=1 SV=1	21	22	39	22	1	1268	141.4	6.87	120.38	22	0	8.31405e+06	6.08271e+07	8.35915e+06	1.07783e+07	2.40673e+07	34306240
Q4LE64	NUMA1	NUMA1 variant protein (Fragment) OS=Homo sapiens OX=9606 GN=NUMA1 variant protein PE=2 SV=1	12	20	37	20	1	2121	238.7	5.81	120.2	20	0	5.92208e+06	2.01783e+07	3.91522e+06	6.84553e+06	1.9396e+07	8.32371e+06
Q59EP2	#N/A	Angiotensinogen variant (Fragment) OS=Homo sapiens OX=9606 PE=2 SV=1	16	6	33	6	1	491	53.7	6.42	119.83	6	0	4.6473e+06	1.16748e+07	9.84879e+06	1.12586e+07	1.14218e+07	5.10418e+06
Q59GY2	#N/A	Ribosomal protein L4 variant (Fragment) OS=Homo sapiens OX=9606 PE=2 SV=1	23	10	44	10	1	441	49	11.02	119.08	10	0	1.24474e+07	4.60444e+07	1.74545e+07	2.1362e+07	2.51522e+07	1.97878e+07
B2R4R0	HIST1H4L	Histone H4 OS=Homo sapiens OX=9606 GN=HIST1H4L PE=2 SV=1	57	11	46	11	1	103	11.4	11.36	118.85	11	0	1.13301e+08	1414976898	7.0527e+07	2.21882e+08	2.75025e+08	4.22291e+07
O60506	SYNCRIP	Heterogeneous nuclear ribonucleoprotein Q OS=Homo sapiens OX=9606 GN=SYNCRIP PE=1 SV=2	26	14	43	9	1	623	69.6	8.59	118.52	14	0	3.71285e+06	2.28358e+07	3.76228e+06	6.9292e+06	1.21539e+07	7.37469e+06
Q06033	ITIH3	Inter-alpha-trypsin inhibitor heavy chain H3 OS=Homo sapiens OX=9606 GN=ITIH3 PE=1 SV=2	18	12	37	12	1	890	99.8	5.74	117.8	12	0	1.49485e+07	2.31012e+07	41911533	4.14286e+07	4.23564e+06	1.64699e+07
A0A024R7V6	RAB2	RAB2, member RAS oncogene family, isoform CRA_a OS=Homo sapiens OX=9606 GN=RAB2 PE=4 SV=1	49	8	35	8	1	212	23.5	6.54	117.68	8	0	1.82611e+07	1.52943e+07	8.07804e+06	1.72841e+07	1.68073e+07	2.08086e+07
Q4W4Y1	DRIP4	Dopamine receptor interacting protein 4 OS=Homo sapiens OX=9606 GN=DRIP4 PE=2 SV=1	28	20	42	20	1	868	96	6.52	117.42	20	0	1.53727e+07	1.74947e+07	1.46487e+07	1.76586e+07	2.76869e+07	2.35212e+07
P35606	COPB2	Coatomer subunit beta' OS=Homo sapiens OX=9606 GN=COPB2 PE=1 SV=2	26	17	40	17	1	906	102.4	5.27	117.06	17	0	1.38999e+07	4.02591e+07	1.69335e+07	2.02877e+07	2.17775e+07	1.47251e+07
A0A223G1A3	HLA-DRB1	MHC class II antigen (Fragment) OS=Homo sapiens OX=9606 GN=HLA-DRB1 PE=3 SV=1	40	6	34	2	1	228	26	7.88	117.02	6	2	5.17502e+06	9.74847e+06	1.03856e+07	1.03715e+07	2.37675e+07	1.54163e+07
P25815	S100P	Protein S100-P OS=Homo sapiens OX=9606 GN=S100P PE=1 SV=2	39	5	32	5	1	95	10.4	4.88	116.65	5	0	5.28933e+07	2.16821e+06	4.47872e+07	4.86988e+07	1.1398e+08	8.63227e+07
P09917	ALOX5	Arachidonate 5-lipoxygenase OS=Homo sapiens OX=9606 GN=ALOX5 PE=1 SV=2	21	11	35	11	1	674	77.9	5.77	116.51	11	0	1.37815e+07	1031526	5.90083e+06	1.11486e+07	8.54106e+06	9.07457e+06
P30044	PRDX5	Peroxiredoxin-5, mitochondrial OS=Homo sapiens OX=9606 GN=PRDX5 PE=1 SV=4	37	6	33	6	1	214	22.1	8.7	115.51	6	0	6.54152e+06	8.53423e+06	1.54434e+07	1.54875e+07	1.60139e+07	15042420
O00160	MYO1F	Unconventional myosin-If OS=Homo sapiens OX=9606 GN=MYO1F PE=1 SV=3	12	12	43	12	1	1098	124.8	9.11	115.47	12	0	2.12123e+07	4.15818e+06	1.08976e+07	1.77938e+07	1.429e+07	1.15723e+07
A0A0S2Z4J1	HSD17B4	Epididymis secretory sperm binding protein (Fragment) OS=Homo sapiens OX=9606 GN=HSD17B4 PE=2 SV=1	23	11	35	11	1	736	79.6	8.84	115.25	11	0	3.12832e+06	2.27566e+07	4.86074e+06	1.03385e+07	6.61468e+06	8.97763e+06
V9HW48	HEL-S-115	SH3 domain-binding glutamic acid-rich-like protein OS=Homo sapiens OX=9606 GN=HEL-S-115 PE=2 SV=1	61	6	34	6	1	114	12.8	5.25	114.83	6	0	1.03336e+07	2.40388e+07	1.30514e+07	9.23597e+06	3.57335e+07	1.50119e+07
O43390	HNRNPR	Heterogeneous nuclear ribonucleoprotein R OS=Homo sapiens OX=9606 GN=HNRNPR PE=1 SV=1	24	14	43	9	1	633	70.9	8.13	114.82	14	5	1.10274e+07	5.73176e+07	1.30456e+07	2.13736e+07	3.81845e+07	2.13807e+07
D6RER5	43719	Septin-11 OS=Homo sapiens OX=9606 GN=SEPT11 PE=1 SV=1	28	12	34	7	1	432	49.8	6.68	114.51	12	4	3.37879e+06	2.38194e+07	3.8366e+06	6.94965e+06	1.37094e+07	3.14383e+06
Q03252	LMNB2	Lamin-B2 OS=Homo sapiens OX=9606 GN=LMNB2 PE=1 SV=4	31	17	41	15	1	620	69.9	5.59	114.19	17	0	1.5e+07	3.36392e+07	9.87049e+06	1.88354e+07	4.28066e+07	2.19475e+07
D6REX3	SEC31A	Protein transport protein Sec31A OS=Homo sapiens OX=9606 GN=SEC31A PE=1 SV=1	13	14	37	14	1	1251	136.1	6.98	114.1	14	0	1.26596e+07	4.39954e+07	3.30842e+07	2.17342e+07	1.94602e+07	1.50564e+07
A0A0S2Z3X8	GDI1	Rab GDP dissociation inhibitor (Fragment) OS=Homo sapiens OX=9606 GN=GDI1 PE=2 SV=1	30	12	38	3	1	447	50.6	5.14	113.6	12	0	1.58649e+06	3.24554e+06	2.30361e+06	800259	6.3662e+06	1.97541e+06
V9HW96	HEL-S-100n	Chaperonin containing TCP1, subunit 2 (Beta), isoform CRA_b OS=Homo sapiens OX=9606 GN=HEL-S-100n PE=2 SV=1	39	17	34	17	1	535	57.5	6.46	113.16	17	0	1.44296e+07	6.72956e+07	7.28716e+06	2.83992e+07	1.99315e+07	1.4978e+07
B0YIW6	ARCN1	Archain 1, isoform CRA_a OS=Homo sapiens OX=9606 GN=ARCN1 PE=1 SV=1	21	11	37	11	1	552	61.6	5.85	112.96	11	0	3.35474e+06	2.92948e+07	5.03569e+06	9.86672e+06	1.3265e+07	7.35957e+06
P62136	PPP1CA	Serine/threonine-protein phosphatase PP1-alpha catalytic subunit OS=Homo sapiens OX=9606 GN=PPP1CA PE=1 SV=1	35	11	33	4	1	330	37.5	6.33	112.49	11	6	2.18937e+07	1.68133e+07	2.16207e+07	2.81946e+07	3.33805e+07	2.79721e+07
P16452	EPB42	Erythrocyte membrane protein band 4.2 OS=Homo sapiens OX=9606 GN=EPB42 PE=1 SV=3	25	14	40	13	1	691	77	8.09	112.48	14	0	8.86583e+06	2.7121e+07	891282	1.61815e+07	509319	1.72197e+07
A0A024RDY3	LAMP1	Lysosomal-associated membrane protein 1, isoform CRA_a OS=Homo sapiens OX=9606 GN=LAMP1 PE=3 SV=1	13	6	38	6	1	417	44.9	8.75	112.47	6	0	4.35146e+07	3.61494e+07	3.04891e+07	3.50647e+07	3.84002e+07	4.47652e+07
P16070	CD44	CD44 antigen OS=Homo sapiens OX=9606 GN=CD44 PE=1 SV=3	10	7	37	7	1	742	81.5	5.33	112.3	7	0	2.07564e+07	4.5967e+07	3.18019e+07	3.55233e+07	7.08897e+07	4.92561e+07
Q07960	ARHGAP1	Rho GTPase-activating protein 1 OS=Homo sapiens OX=9606 GN=ARHGAP1 PE=1 SV=1	25	9	36	9	1	439	50.4	6.29	111.21	9	0	5.3443e+06	2.56951e+07	6.4007e+06	13264023	1.79022e+07	1.06294e+07
Q9Y277	VDAC3	Voltage-dependent anion-selective channel protein 3 OS=Homo sapiens OX=9606 GN=VDAC3 PE=1 SV=1	26	8	34	7	1	283	30.6	8.66	111.11	8	0	1.08614e+07	2.17729e+07	1.13934e+07	1.93738e+07	7.13598e+06	1.81544e+07
P61106	RAB14	Ras-related protein Rab-14 OS=Homo sapiens OX=9606 GN=RAB14 PE=1 SV=4	41	7	31	5	1	215	23.9	6.21	110.78	7	0	3.20939e+06	1.04466e+07	5.41574e+06	4.75623e+06	9.35332e+06	7.5173e+06
P05387	RPLP2	60S acidic ribosomal protein P2 OS=Homo sapiens OX=9606 GN=RPLP2 PE=1 SV=1	74	7	30	7	1	115	11.7	4.54	110.74	7	0	1.8413e+07	1.39283e+08	2.82047e+07	4.12892e+07	7.56317e+07	40900821
A0A024R1Z6	VAT1	Vesicle amine transport protein 1 homolog (T californica), isoform CRA_a OS=Homo sapiens OX=9606 GN=VAT1 PE=4 SV=1	44	11	36	11	1	393	41.9	6.29	110.72	11	0	4.0218e+07	2.65447e+07	1.98289e+07	2.94607e+07	4.46005e+07	2.74029e+07
P08294	SOD3	Extracellular superoxide dismutase [Cu-Zn] OS=Homo sapiens OX=9606 GN=SOD3 PE=1 SV=2	56	9	31	9	1	240	25.8	6.61	110.64	9	0	861791	2.34134e+07	457485	4.40319e+06	7.24792e+07	1.01763e+07
P32320	CDA	Cytidine deaminase OS=Homo sapiens OX=9606 GN=CDA PE=1 SV=2	49	6	29	6	1	146	16.2	6.92	110.51	6	0	3.61384e+07	865661	1.6159e+07	2.38713e+07	3.29817e+07	1.81182e+07
A0A024R056	GNB1	Guanine nucleotide binding protein (G protein), beta polypeptide 1, isoform CRA_a OS=Homo sapiens OX=9606 GN=GNB1 PE=2 SV=1	52	10	32	6	1	340	37.4	6	110.4	10	4	3.38356e+07	5.18588e+07	2.49923e+07	4.07307e+07	6.677e+07	3.60933e+07
Q32P28	P3H1	Prolyl 3-hydroxylase 1 OS=Homo sapiens OX=9606 GN=P3H1 PE=1 SV=2	21	13	37	13	1	736	83.3	5.14	110.34	13	0	8.48945e+06	4.71563e+07	1.72823e+07	1.7875e+07	1.32383e+07	9.32873e+06
P38606	ATP6V1A	V-type proton ATPase catalytic subunit A OS=Homo sapiens OX=9606 GN=ATP6V1A PE=1 SV=2	23	10	33	10	1	617	68.3	5.52	109.81	10	0	3.18652e+06	1.90272e+07	6.61551e+06	1.03674e+07	1.5059e+07	1.03296e+07
B2RBR9	#N/A	cDNA, FLJ95650, highly similar to Homo sapiens karyopherin (importin) beta 1 (KPNB1), mRNA OS=Homo sapiens OX=9606 PE=2 SV=1	16	11	37	11	1	876	97.1	4.78	109.44	11	0	1.50251e+07	3.49467e+07	1.08434e+07	2.08997e+07	3.44913e+07	1.80952e+07
Q59H77	#N/A	T-complex protein 1 subunit gamma (Fragment) OS=Homo sapiens OX=9606 PE=2 SV=1	35	18	38	18	1	577	63.5	6.43	108.99	18	0	2.7205e+08	4.9211e+08	1226198370	7.30519e+08	1.59334e+08	1.70397e+08
B4DJQ5	#N/A	cDNA FLJ59211, highly similar to Glucosidase 2 subunit beta OS=Homo sapiens OX=9606 PE=2 SV=1	25	10	38	10	1	535	60.1	4.42	108.95	10	0	1.8125e+07	4.14531e+07	2.12992e+07	2.47909e+07	4.02215e+07	2.62525e+07
A0A087X1U0	TPSB2	Tryptase beta-2 OS=Homo sapiens OX=9606 GN=TPSB2 PE=1 SV=1	31	8	34	8	1	292	32.6	7.25	108.89	8	0	178231	3.92718e+07	9.97984e+06	1.41078e+07	1.28416e+08	1.17508e+07
B4E1U9	#N/A	cDNA FLJ54776, highly similar to Cell division control protein 42 homolog OS=Homo sapiens OX=9606 PE=2 SV=1	34	6	37	5	1	236	26.5	7.59	108.87	6	0	2.60886e+07	2.96995e+07	2.92034e+07	3.18626e+07	4.90485e+07	3.96663e+07
O75955	FLOT1	Flotillin-1 OS=Homo sapiens OX=9606 GN=FLOT1 PE=1 SV=3	38	14	35	14	1	427	47.3	7.49	108.76	14	0	3.43084e+07	2.96196e+07	1.26622e+07	2.72779e+07	3.61502e+07	2.4822e+07
A0A0C4DGQ5	CAPNS1	Calpain small subunit 1 OS=Homo sapiens OX=9606 GN=CAPNS1 PE=1 SV=1	43	7	29	7	1	322	33.8	6.23	108.74	7	0	1.80606e+07	1.98275e+07	1.48241e+07	1.25999e+07	1.9614e+07	1.59858e+07
Q96AY3	FKBP10	Peptidyl-prolyl cis-trans isomerase FKBP10 OS=Homo sapiens OX=9606 GN=FKBP10 PE=1 SV=1	28	14	40	14	1	582	64.2	5.62	108.48	14	0	1.02663e+07	5.13296e+07	2.22648e+07	1.47009e+07	1.37798e+07	1.00344e+07
Q6NS36	FTH1	Ferritin (Fragment) OS=Homo sapiens OX=9606 GN=FTH1 PE=2 SV=1	47	6	29	6	1	232	26.2	6.52	108.27	6	0	2.13615e+06	1.13767e+07	7.95934e+06	3.10378e+06	7.38499e+07	1.47637e+07
V9GYM3	APOA2	Apolipoprotein A-II OS=Homo sapiens OX=9606 GN=APOA2 PE=1 SV=1	17	5	43	5	1	133	14.9	8.27	107.64	5	0	7.58335e+07	1.22729e+08	8.59993e+07	8.81064e+07	2.56069e+07	4.41458e+07
A8K4W0	RPS3A	40S ribosomal protein S3a OS=Homo sapiens OX=9606 GN=RPS3A PE=2 SV=1	41	10	38	10	1	264	29.9	9.73	107.22	10	0	2.06905e+07	9.83038e+07	2.26683e+07	4.07348e+07	3.87053e+07	2.82176e+07
A0A125QYY9	#N/A	IBM-B2 heavy chain variable region (Fragment) OS=Homo sapiens OX=9606 PE=2 SV=1	46	4	27	2	1	123	13.6	7.12	106.86	4	1	1.75468e+07	2.71273e+07	4.59969e+07	3.38466e+07	1.29025e+07	8.78121e+06
P62140	PPP1CB	Serine/threonine-protein phosphatase PP1-beta catalytic subunit OS=Homo sapiens OX=9606 GN=PPP1CB PE=1 SV=3	26	9	31	2	1	327	37.2	6.19	106.85	9	0	5.5817e+06	3.98169e+06	6.45095e+06	6.40867e+06	5.92638e+06	7.72602e+06
B4E0X1	#N/A	Beta-2-microglobulin OS=Homo sapiens OX=9606 PE=2 SV=1	37	4	31	4	1	122	13.9	7.44	106.75	4	0	9.53475e+06	2.54436e+07	8.6106e+06	1.67569e+07	2.85688e+07	1.28918e+07
Q15436	SEC23A	Protein transport protein Sec23A OS=Homo sapiens OX=9606 GN=SEC23A PE=1 SV=2	28	14	34	12	1	765	86.1	7.08	106.74	14	2	8.06513e+06	2.75541e+07	8.03507e+06	9.55353e+06	1.17901e+07	7.31197e+06
B4DI63	#N/A	cDNA FLJ59205, highly similar to Mimecan OS=Homo sapiens OX=9606 PE=2 SV=1	28	11	39	11	1	356	40.5	7.99	106.3	11	0	808021	8.52659e+07	1.33965e+06	5.23099e+06	2.80926e+08	9.16401e+07
V9HW37	HEL-S-69	T-complex protein 1 subunit epsilon OS=Homo sapiens OX=9606 GN=HEL-S-69 PE=2 SV=1	39	15	37	14	1	541	59.6	5.66	105.54	15	0	1.48657e+07	3.40281e+07	1.20912e+07	1.58752e+07	2.56145e+07	2.80265e+07
Q5NV90	V2-17	V2-17 protein (Fragment) OS=Homo sapiens OX=9606 GN=V2-17 PE=1 SV=1	62	4	33	2	1	97	10.4	4.59	105.38	4	1	6.72781e+06	1.55648e+07	7.23743e+07	5.161e+07	8.45858e+06	8.9181e+06
P02753	RBP4	Retinol-binding protein 4 OS=Homo sapiens OX=9606 GN=RBP4 PE=1 SV=3	46	8	35	8	1	201	23	6.07	105.26	8	0	1.75548e+07	3.00783e+07	2.66154e+07	1.89036e+07	2.01572e+07	1.75994e+07
A0A0U1RRM4	PTBP1	Polypyrimidine tract-binding protein 1 OS=Homo sapiens OX=9606 GN=PTBP1 PE=1 SV=1	26	11	34	10	1	588	62.4	9.1	104.99	11	1	6.40475e+06	4.17741e+07	7.63429e+06	1.35882e+07	1.61325e+07	9.42184e+06
P23381	WARS	Tryptophan--tRNA ligase, cytoplasmic OS=Homo sapiens OX=9606 GN=WARS PE=1 SV=2	20	6	29	6	1	471	53.1	6.23	104.85	6	0	2.81279e+06	1.09138e+07	3.55604e+06	4.88653e+06	1.01118e+07	4.24531e+06
Q9UL81	#N/A	Myosin-reactive immunoglobulin light chain variable region (Fragment) OS=Homo sapiens OX=9606 PE=2 SV=1	57	4	30	2	1	107	11.5	8.48	103.98	4	0	707820	1.48637e+06	1.93566e+06	1.1971e+06	NA	NA
P02792	FTL	Ferritin light chain OS=Homo sapiens OX=9606 GN=FTL PE=1 SV=2	43	7	27	7	1	175	20	5.78	103.95	7	0	2.11717e+06	8.01689e+06	3.4146e+06	869216	5.96248e+07	1.43932e+07
B2R5M8	#N/A	Isocitrate dehydrogenase [NADP] OS=Homo sapiens OX=9606 PE=2 SV=1	34	11	35	10	1	414	46.6	7.01	103.65	11	0	6.78046e+06	1.26397e+07	6.86905e+06	6.02706e+06	2.02284e+07	4.686e+06
P03956	MMP1	Interstitial collagenase OS=Homo sapiens OX=9606 GN=MMP1 PE=1 SV=3	39	14	33	14	1	469	54	6.96	103.57	14	0	4.46582e+06	560350	800888	5.03281e+06	1.66993e+08	1.59578e+07
A0A140VJI7	#N/A	Testicular tissue protein Li 61 OS=Homo sapiens OX=9606 PE=2 SV=1	30	10	29	10	1	540	60.6	6.71	103.19	10	0	1.03083e+07	1.07526e+07	1.59788e+07	1.72303e+07	8.5365e+06	1.68224e+07
Q53HV2	#N/A	T-complex protein 1 subunit eta (Fragment) OS=Homo sapiens OX=9606 PE=2 SV=1	21	10	38	10	1	543	59.3	7.65	102.78	10	0	1.497e+07	3.12837e+07	1.46234e+07	2.42454e+07	2.69238e+07	2.58476e+07
A0A024R324	RHOA	Epididymis secretory sperm binding protein OS=Homo sapiens OX=9606 GN=RHOA PE=2 SV=1	49	9	35	3	1	193	21.8	6.1	102.11	9	6	3.83913e+07	5.47456e+07	2.62482e+07	4.28833e+07	3.78164e+07	3.19012e+07
P18085	ARF4	ADP-ribosylation factor 4 OS=Homo sapiens OX=9606 GN=ARF4 PE=1 SV=3	53	10	33	7	1	180	20.5	7.14	101.98	10	4	3.61865e+07	6.51053e+07	4.27008e+07	4.55121e+07	4.02761e+07	5.52809e+07
A0A0A0MTH3	ILK	Integrin-linked protein kinase OS=Homo sapiens OX=9606 GN=ILK PE=1 SV=1	34	13	34	13	1	483	54.6	7.97	101.62	13	0	7.25162e+06	2.40891e+07	7.23752e+06	1.28411e+07	2.2779e+07	2.08648e+07
B5BUE6	DDX5	ATP-dependent RNA helicase DDX5 (Fragment) OS=Homo sapiens OX=9606 GN=DDX5 PE=2 SV=1	31	17	37	12	1	614	69.1	8.92	101.42	17	0	1.58148e+06	1.08385e+07	1.18026e+06	3.66942e+06	4.99861e+06	5.55876e+06
A0A140VK07	#N/A	Testicular secretory protein Li 7 OS=Homo sapiens OX=9606 PE=2 SV=1	39	20	34	18	1	684	73.9	6.35	101.37	20	2	2.74444e+06	5.04633e+07	1.32226e+07	8.1556e+06	5.99417e+07	1.11526e+07
B4DH02	#N/A	cDNA FLJ50510, highly similar to Heat shock 70 kDa protein 4 OS=Homo sapiens OX=9606 PE=2 SV=1	24	15	31	14	1	840	94.3	5.19	101.26	15	1	5.65385e+06	1.69248e+07	4.02908e+06	7.95079e+06	1.10545e+07	5.30867e+06
P0DJI8	SAA1	Serum amyloid A-1 protein OS=Homo sapiens OX=9606 GN=SAA1 PE=1 SV=1	55	6	25	5	1	122	13.5	6.79	100.93	6	1	4.02238e+07	3.61495e+06	1.85307e+06	6.04096e+07	4.66381e+07	5.36879e+06
O75367	H2AFY	Core histone macro-H2A.1 OS=Homo sapiens OX=9606 GN=H2AFY PE=1 SV=4	32	7	28	7	1	372	39.6	9.79	100.55	7	0	1.06624e+07	2.19783e+07	9.31061e+06	1.13307e+07	1.36634e+07	8.14422e+06
A8K3H8	#N/A	cDNA FLJ77680, highly similar to Homo sapiens protein phosphatase 2 (formerly 2A), regulatory subunit A (PR 65), alpha isoform (PPP2R1A), mRNA OS=Homo sapiens OX=9606 PE=2 SV=1	20	9	30	9	1	589	65.3	5.11	100.41	9	0	8.59507e+06	1.63506e+07	5.16437e+06	1.15675e+07	1.54001e+07	1.19859e+07
A0N5G3	V-lambda-3	Rheumatoid factor G9 light chain (Fragment) OS=Homo sapiens OX=9606 GN=V-lambda-3 PE=2 SV=1	58	4	41	3	1	121	12.9	6.52	99.99	4	0	3.08287e+06	2.84225e+06	5.11067e+06	2.29893e+06	1.69918e+06	1.62767e+06
A0A024QZ95	OLFM4	Olfactomedin 4, isoform CRA_a OS=Homo sapiens OX=9606 GN=OLFM4 PE=4 SV=1	18	7	33	7	1	510	57.2	5.69	99.64	7	0	2.45527e+07	2.68895e+06	9.65746e+06	1.55883e+07	1.46542e+07	1.32389e+07
Q6IAW5	CALU	CALU protein OS=Homo sapiens OX=9606 GN=CALU PE=2 SV=1	23	5	24	5	1	315	37.1	4.64	99.37	5	0	5.21861e+06	3.21006e+07	7.24561e+06	1.07676e+07	1.87837e+07	3.99372e+06
A0A384N6H6	#N/A	Epididymis secretory sperm binding protein OS=Homo sapiens OX=9606 PE=2 SV=1	64	14	32	14	1	371	42.7	6.86	98.98	14	0	3.7548e+06	4.92363e+07	6.10662e+06	1.13439e+07	2.59051e+07	9.84462e+06
A0A024RB16	FAM62A	Family with sequence similarity 62 (C2 domain containing), member A, isoform CRA_a OS=Homo sapiens OX=9606 GN=FAM62A PE=4 SV=1	18	13	34	13	1	1114	123.9	5.78	98.75	13	0	2.68855e+06	1.8269e+07	4.99418e+06	1.33557e+07	9.14771e+06	6.89677e+06
B2R7U4	#N/A	Heme oxygenase OS=Homo sapiens OX=9606 PE=2 SV=1	32	9	28	9	1	288	32.8	8.25	98.57	9	0	1.39186e+06	5.89146e+06	1.40019e+07	608292	1.38793e+07	2.67492e+07
E9PR17	#N/A	Uncharacterized protein OS=Homo sapiens OX=9606 PE=1 SV=1	19	4	30	4	1	130	14.5	7.77	98.27	4	0	4.02214e+07	3.36643e+07	1.63727e+07	2.79495e+07	2.1113e+07	3.88804e+07
A0A384P5T6	#N/A	Epididymis secretory sperm binding protein OS=Homo sapiens OX=9606 PE=2 SV=1	21	15	32	15	1	999	111.3	5.22	98.2	15	0	6.22651e+06	2.5591e+07	8.7475e+06	1.27936e+07	1.19355e+07	1.81956e+07
P61981	YWHAG	14-3-3 protein gamma OS=Homo sapiens OX=9606 GN=YWHAG PE=1 SV=2	40	8	36	4	1	247	28.3	4.89	98.15	8	0	1.33991e+07	2.10962e+07	1.26166e+07	1.37719e+07	3.62773e+07	1.74294e+07
A0A087X1Z3	PSME2	Proteasome activator complex subunit 2 OS=Homo sapiens OX=9606 GN=PSME2 PE=1 SV=1	21	4	32	4	1	254	29.1	6.71	97.88	4	0	4.21862e+06	6.89905e+06	4.67428e+06	5.14283e+06	3.94959e+06	5.00358e+06
Q16891	IMMT	MICOS complex subunit MIC60 OS=Homo sapiens OX=9606 GN=IMMT PE=1 SV=1	22	13	31	13	1	758	83.6	6.48	97.19	13	0	4.90473e+06	2.10841e+07	6.54582e+06	5.29956e+06	1.89767e+07	1.29977e+07
Q7YPT8	HLA-DQA1/DRA	MHC class II antigen OS=Homo sapiens OX=9606 GN=HLA-DQA1/DRA PE=2 SV=1	18	3	26	3	1	255	28.5	5.6	96.95	3	0	7.03674e+06	1.14496e+07	1.11708e+07	13152278	21979391	7.49008e+06
P54727	RAD23B	UV excision repair protein RAD23 homolog B OS=Homo sapiens OX=9606 GN=RAD23B PE=1 SV=1	17	4	25	4	1	409	43.1	4.84	96.74	4	0	2.96056e+06	1.07455e+07	5.0251e+06	4.28496e+06	1.18521e+07	3.67091e+06
Q9HBB3	#N/A	60S ribosomal protein L6 OS=Homo sapiens OX=9606 PE=2 SV=1	27	9	37	9	1	289	32.9	10.58	96.72	9	0	1.69163e+07	7.16599e+07	1.81124e+07	2.71412e+07	3.55424e+07	2.74656e+07
A0A384MTY2	#N/A	Epididymis secretory sperm binding protein OS=Homo sapiens OX=9606 PE=2 SV=1	52	8	29	8	1	142	15.9	5.67	96.56	8	0	1.04518e+07	1.44255e+07	7.02701e+06	4.4126e+06	1.34304e+07	5.37952e+06
P08754	GNAI3	Guanine nucleotide-binding protein G(k) subunit alpha OS=Homo sapiens OX=9606 GN=GNAI3 PE=1 SV=3	30	10	33	4	1	354	40.5	5.69	96.33	10	0	9.7427e+06	5.64827e+06	4.92358e+06	8.30612e+06	4.96163e+06	9.61442e+06
P25398	RPS12	40S ribosomal protein S12 OS=Homo sapiens OX=9606 GN=RPS12 PE=1 SV=3	61	8	32	8	1	132	14.5	7.21	96.26	8	0	4.65641e+06	8.54349e+07	1.17179e+07	2.3806e+07	2.70409e+07	1.26773e+07
P00325	ADH1B	Alcohol dehydrogenase 1B OS=Homo sapiens OX=9606 GN=ADH1B PE=1 SV=2	45	18	30	18	1	375	39.8	8.29	96.19	18	0	NA	NA	156357	709527	1.70517e+08	1.23772e+07
Q53FI7	#N/A	Four and a half LIM domains 1 variant (Fragment) OS=Homo sapiens OX=9606 PE=2 SV=1	42	11	32	11	1	280	31.9	8.22	96.16	11	0	NA	1.96974e+07	902888	1.95142e+06	6.65855e+07	1.22944e+07
Q9UJU6	DBNL	Drebrin-like protein OS=Homo sapiens OX=9606 GN=DBNL PE=1 SV=1	29	8	25	2	1	430	48.2	5.05	96.14	8	5	9.33239e+06	9.45663e+06	1.01311e+07	1.13423e+07	1.90912e+07	9.22974e+06
P53618	COPB1	Coatomer subunit beta OS=Homo sapiens OX=9606 GN=COPB1 PE=1 SV=3	18	12	26	12	1	953	107.1	6.05	96.14	12	0	2.79176e+06	1.36341e+07	3.90069e+06	5.43804e+06	6.64037e+06	4.19841e+06
P05546	SERPIND1	Heparin cofactor 2 OS=Homo sapiens OX=9606 GN=SERPIND1 PE=1 SV=3	17	8	34	8	1	499	57	6.9	95.64	8	0	1.12149e+07	2.11402e+07	2.51514e+07	3.05785e+07	9.19034e+06	4.42097e+07
A0A024R814	RPL7	Ribosomal protein L7, isoform CRA_a OS=Homo sapiens OX=9606 GN=RPL7 PE=4 SV=1	41	15	35	15	1	259	30.4	10.71	94.81	15	0	1.37766e+07	7.50598e+07	1.80485e+07	2.76707e+07	2.05794e+07	2.35524e+07
Q9Y2Q3	GSTK1	Glutathione S-transferase kappa 1 OS=Homo sapiens OX=9606 GN=GSTK1 PE=1 SV=3	34	7	32	7	1	226	25.5	8.41	94.69	7	0	4.42032e+06	9.16861e+06	3.7812e+06	8.07828e+06	7.61295e+06	8.93817e+06
Q13200	PSMD2	26S proteasome non-ATPase regulatory subunit 2 OS=Homo sapiens OX=9606 GN=PSMD2 PE=1 SV=3	19	12	29	12	1	908	100.1	5.2	94.68	12	0	6.56127e+06	1.69866e+07	7.50427e+06	7.07009e+06	1.41348e+07	9.38086e+06
A8K690	#N/A	cDNA FLJ76863, highly similar to Homo sapiens stress-induced-phosphoprotein 1 (Hsp70/Hsp90-organizing protein) (STIP1), mRNA OS=Homo sapiens OX=9606 PE=2 SV=1	28	12	30	12	1	543	62.6	6.8	94.58	12	0	9.98619e+06	1.81493e+07	1.03408e+07	9.95577e+06	2.56088e+07	1.1926e+07
A0A2Q2TTZ9	IGKV1D-33	Immunoglobulin kappa variable 1-33 OS=Homo sapiens OX=9606 GN=IGKV1D-33 PE=1 SV=1	54	3	25	2	1	108	11.8	5.34	94.46	3	0	795408	1.85997e+06	7.27679e+06	5.2035e+06	2.72015e+06	1.14742e+06
Q96QK1	VPS35	Vacuolar protein sorting-associated protein 35 OS=Homo sapiens OX=9606 GN=VPS35 PE=1 SV=2	18	12	31	12	1	796	91.6	5.49	94.35	12	0	8.97187e+06	1.63465e+07	1.11408e+07	1.63046e+07	8.71292e+06	1.3028e+07
Q59EA2	#N/A	Coronin (Fragment) OS=Homo sapiens OX=9606 PE=2 SV=1	27	12	31	12	1	501	56.3	8.19	94.2	12	0	7.50666e+06	4.25724e+07	6.56396e+06	1.02287e+07	2.47349e+07	7.42273e+06
P07357	C8A	Complement component C8 alpha chain OS=Homo sapiens OX=9606 GN=C8A PE=1 SV=2	27	10	28	10	1	584	65.1	6.47	94.16	10	0	1.1659e+07	7.95449e+06	2.00332e+07	1.70769e+07	1.08388e+07	2.06555e+07
A0A2R8Y3M9	#N/A	Uncharacterized protein OS=Homo sapiens OX=9606 PE=4 SV=1	22	10	30	3	1	631	71.3	7.66	93.63	10	6	7.06718e+06	1.08719e+07	1.50122e+07	1.54036e+07	1.42574e+07	8.70259e+06
B0I1S9	MYO1B	MYO1B variant protein OS=Homo sapiens OX=9606 GN=MYO1B PE=2 SV=1	21	18	32	18	1	1136	131.9	9.38	93.51	18	0	4.26066e+06	2.72145e+07	2.57005e+06	1.17532e+07	1.33232e+07	1.19953e+07
A0A087WTP3	KHSRP	Far upstream element-binding protein 2 OS=Homo sapiens OX=9606 GN=KHSRP PE=1 SV=1	17	9	30	9	1	711	73	7.71	93.12	9	0	6.33327e+06	2.48156e+07	8.72786e+06	1.2897e+07	1.99306e+07	1.03241e+07
D3DVC4	NES	Nestin, isoform CRA_c OS=Homo sapiens OX=9606 GN=NES PE=3 SV=1	13	17	30	17	1	1621	177.3	4.36	93.04	17	0	1.511e+06	2.68646e+07	1.94568e+06	3.36859e+06	1.6261e+07	9.92352e+06
P55084	HADHB	Trifunctional enzyme subunit beta, mitochondrial OS=Homo sapiens OX=9606 GN=HADHB PE=1 SV=3	30	10	27	10	1	474	51.3	9.41	92.98	10	0	1.71664e+07	2.57809e+07	7.22389e+06	1.45282e+07	3.13223e+07	1.9023e+07
P55735	SEC13	Protein SEC13 homolog OS=Homo sapiens OX=9606 GN=SEC13 PE=1 SV=3	32	5	25	5	1	322	35.5	5.48	92.69	5	0	3.53348e+06	1.49003e+07	3.94291e+06	6.22569e+06	8.35123e+06	4.69068e+06
Q9HAV0	GNB4	Guanine nucleotide-binding protein subunit beta-4 OS=Homo sapiens OX=9606 GN=GNB4 PE=1 SV=3	23	5	30	2	1	340	37.5	6	92.54	5	0	1.64772e+06	2.92179e+06	NA	NA	NA	NA
A0A024QZ77	EFHD2	EF-hand domain family, member D2, isoform CRA_a OS=Homo sapiens OX=9606 GN=EFHD2 PE=2 SV=1	44	9	31	9	1	240	26.7	5.2	92.14	9	0	1.57144e+07	5.56935e+06	7.13453e+06	9.15957e+06	1.5667e+07	9.10518e+06
E5KRK5	NDUFS1	Mitochondrial NADH-ubiquinone oxidoreductase 75 kDa subunit OS=Homo sapiens OX=9606 GN=NDUFS1 PE=3 SV=1	22	10	27	10	1	727	79.4	6.23	91.31	10	0	1.97768e+06	1.57813e+07	3.00331e+06	7.84715e+06	1.26215e+07	7.99342e+06
Q9HD89	RETN	Resistin OS=Homo sapiens OX=9606 GN=RETN PE=1 SV=1	58	4	25	4	1	108	11.4	6.86	91.24	4	0	4.66955e+07	6.39324e+06	2.45023e+07	3.58999e+07	4.83084e+07	8.02265e+06
Q6IBS0	TWF2	Twinfilin-2 OS=Homo sapiens OX=9606 GN=TWF2 PE=1 SV=2	19	4	25	4	1	349	39.5	6.84	90.67	4	0	1.19401e+06	4.8749e+06	3.86572e+06	4.18975e+06	1.49018e+07	4.01219e+06
A0A0S2Z3L0	ETFA	Electron-transfer-flavoprotein alpha polypeptide isoform 1 (Fragment) OS=Homo sapiens OX=9606 GN=ETFA PE=2 SV=1	36	8	27	8	1	333	35.1	8.38	90.61	8	0	2.21562e+06	1.43121e+07	2.29904e+06	8.98104e+06	1.12274e+07	4.12693e+06
P14598	NCF1	Neutrophil cytosol factor 1 OS=Homo sapiens OX=9606 GN=NCF1 PE=1 SV=4	32	11	32	11	1	390	44.7	9.13	90.24	11	0	1.88438e+07	627836	1.06886e+07	2.19799e+07	5.08505e+06	9.06102e+06
P07814	EPRS	Bifunctional glutamate/proline--tRNA ligase OS=Homo sapiens OX=9606 GN=EPRS PE=1 SV=5	15	16	30	16	1	1512	170.5	7.33	90.15	16	0	4.12738e+06	2.43483e+07	4.98407e+06	8.8974e+06	8.45549e+06	8.93186e+06
B2R582	#N/A	cDNA, FLJ92374, highly similar to Homo sapiens C-type lectin domain family 3, member B (CLEC3B), mRNA OS=Homo sapiens OX=9606 PE=2 SV=1	47	8	26	8	1	202	22.5	6.04	90.06	8	0	4.31826e+06	2.64144e+07	1.7249e+07	8.43117e+06	1.69023e+07	1.32474e+07
O95782	AP2A1	AP-2 complex subunit alpha-1 OS=Homo sapiens OX=9606 GN=AP2A1 PE=1 SV=3	19	15	31	9	1	977	107.5	7.03	89.38	15	5	5.32355e+06	2.03494e+07	8.21891e+06	1.13229e+07	1.02942e+07	8.12474e+06
B2R6F3	SFRS3	Epididymis secretory sperm binding protein OS=Homo sapiens OX=9606 GN=SFRS3 PE=2 SV=1	29	5	29	4	1	164	19.3	11.65	89.3	5	1	2.13037e+07	4.08082e+07	2.18127e+07	2.119e+07	4.77686e+07	2.15375e+07
B3KXY9	#N/A	cDNA FLJ46359 fis, clone TESTI4049786, highly similar to Hexokinase-1 OS=Homo sapiens OX=9606 PE=2 SV=1	21	17	32	17	1	952	106.2	7.17	89.14	17	0	6.38181e+06	3.04731e+07	9.9021e+06	1.66987e+07	2.28243e+07	1.45017e+07
F4ZW66	#N/A	NF110b OS=Homo sapiens OX=9606 PE=2 SV=1	17	15	32	15	1	898	95.7	8.81	89.11	15	0	9.2204e+06	4.61515e+07	9.83638e+06	1.41124e+07	3.08157e+07	1.20812e+07
P30043	BLVRB	Flavin reductase (NADPH) OS=Homo sapiens OX=9606 GN=BLVRB PE=1 SV=3	61	7	29	7	1	206	22.1	7.65	89.1	7	0	1.02983e+07	3.92878e+07	9.53765e+06	2.52893e+07	1.85403e+07	2.3629e+07
A4D2P0	RAC1	Ras-related C3 botulinum toxin substrate 1 (Rho family, small GTP binding protein Rac1) OS=Homo sapiens OX=9606 GN=RAC1 PE=2 SV=1	37	8	31	4	1	211	23.5	8.63	88	8	0	NA	6.77868e+06	235726	1.16592e+06	2.10555e+06	NA
I3L504	EIF5A	Eukaryotic translation initiation factor 5A-1 OS=Homo sapiens OX=9606 GN=EIF5A PE=1 SV=1	30	7	22	7	1	186	20.5	5.25	87.24	7	0	9.00127e+06	3.60058e+07	1.26951e+07	7.57947e+06	2.05287e+07	1.88575e+07
A0A0D9SF53	DDX3X	ATP-dependent RNA helicase DDX3X OS=Homo sapiens OX=9606 GN=DDX3X PE=1 SV=1	17	10	29	9	1	733	81.4	8.07	86.82	10	0	7.32129e+06	1.73763e+07	1.17512e+07	1.02826e+07	1.31664e+07	9.14636e+06
D3DQU2	TPP1	Tripeptidyl peptidase I, isoform CRA_a OS=Homo sapiens OX=9606 GN=TPP1 PE=4 SV=1	14	5	27	5	1	572	62.2	6.65	86.63	5	0	1.6543e+07	3.56112e+07	1.51352e+07	2.74279e+07	2.65558e+07	1.61597e+07
Q9NR12	PDLIM7	PDZ and LIM domain protein 7 OS=Homo sapiens OX=9606 GN=PDLIM7 PE=1 SV=1	37	10	29	10	1	457	49.8	8.41	85.93	10	0	3.44287e+06	2.48419e+07	5.20757e+06	6.77602e+06	2.5837e+07	1.70769e+07
P51572	BCAP31	B-cell receptor-associated protein 31 OS=Homo sapiens OX=9606 GN=BCAP31 PE=1 SV=3	24	5	27	5	1	246	28	8.44	85.8	5	0	1.48938e+07	2.28388e+07	1.51561e+07	1.94074e+07	2.3605e+07	2.30665e+07
P13010	XRCC5	X-ray repair cross-complementing protein 5 OS=Homo sapiens OX=9606 GN=XRCC5 PE=1 SV=3	20	13	31	13	1	732	82.7	5.81	85.7	13	0	5.40295e+06	2.64584e+07	6.24706e+06	8.82379e+06	2.08183e+07	8.51452e+06
B3KUY2	PTGES3	Prostaglandin E synthase 3 (Cytosolic), isoform CRA_c OS=Homo sapiens OX=9606 GN=PTGES3 PE=2 SV=1	19	3	24	3	1	165	19.4	4.97	85.66	3	0	5.90518e+06	1.47256e+07	6.71522e+06	8.50142e+06	1.38946e+07	9.24093e+06
Q6NZI2	CAVIN1	Caveolae-associated protein 1 OS=Homo sapiens OX=9606 GN=CAVIN1 PE=1 SV=1	31	9	25	9	1	390	43.5	5.6	85.45	9	0	5.6125e+06	7.40639e+07	7.42266e+06	2.45471e+07	9.73544e+07	2.34571e+07
A0A140VK65	#N/A	Testicular secretory protein Li 65 OS=Homo sapiens OX=9606 PE=2 SV=1	22	8	26	8	1	511	56.5	5.81	85.05	8	0	1.26175e+07	1.33403e+07	1.09751e+07	1.29367e+07	1.89759e+07	1.71231e+07
Q9NR99	MXRA5	Matrix-remodeling-associated protein 5 OS=Homo sapiens OX=9606 GN=MXRA5 PE=1 SV=3	8	15	28	15	1	2828	312	8.32	84.84	15	0	1.44982e+06	1.18105e+07	8.88011e+06	2.81472e+06	2.55588e+06	NA
P23526	AHCY	Adenosylhomocysteinase OS=Homo sapiens OX=9606 GN=AHCY PE=1 SV=4	17	6	24	6	1	432	47.7	6.34	84.72	6	0	9.78715e+06	1.59363e+07	6.63819e+06	6.39569e+06	2.009e+07	1.55322e+07
A0A384NPN7	ALDH2	Aldehyde dehydrogenase 2 family (Mitochondrial), isoform CRA_c OS=Homo sapiens OX=9606 GN=ALDH2 PE=2 SV=1	22	9	29	8	1	517	56.3	7.05	84.52	9	1	1.27554e+08	1.63551e+07	3.75588e+07	9.60871e+06	3.14988e+07	7.35087e+07
B7ZLW0	LPP	LPP protein OS=Homo sapiens OX=9606 GN=LPP PE=2 SV=1	37	13	26	13	1	612	65.7	7.37	84.51	13	0	434663	1.43204e+07	1.28929e+06	3.78244e+06	2.4822e+07	8.33374e+06
B4E2A6	#N/A	cDNA FLJ55508, highly similar to Sad1/unc-84-like protein 2 OS=Homo sapiens OX=9606 PE=2 SV=1	20	9	23	9	1	752	83.9	6.84	84.21	9	0	5.54997e+06	6.67202e+06	2.81475e+06	4.67503e+06	7.46545e+06	5.85388e+06
Q9UL88	#N/A	Myosin-reactive immunoglobulin heavy chain variable region (Fragment) OS=Homo sapiens OX=9606 PE=2 SV=1	40	5	24	3	1	131	14.1	9.63	84.1	5	2	3.50331e+07	52983893	1.67055e+08	1.07132e+08	2.48208e+07	2.37722e+07
B4DT31	#N/A	cDNA FLJ53425, highly similar to Far upstream element-binding protein 1 OS=Homo sapiens OX=9606 PE=2 SV=1	13	7	27	7	1	665	69.8	7.36	84.01	7	0	8.17166e+06	1.5059e+07	4.87988e+06	7.70636e+06	1.88755e+07	1.24525e+07
A0A0S2Z410	HSD17B10	Epididymis secretory sperm binding protein (Fragment) OS=Homo sapiens OX=9606 GN=HSD17B10 PE=2 SV=1	63	11	22	11	1	261	26.9	7.78	83.85	11	0	1.42522e+06	1.33767e+07	1.23123e+06	6.11887e+06	6.77224e+06	4.16576e+06
P26447	S100A4	Protein S100-A4 OS=Homo sapiens OX=9606 GN=S100A4 PE=1 SV=1	38	5	37	5	1	101	11.7	6.11	83.79	5	0	6.62672e+07	76834835	4.84359e+07	5.53057e+07	8.69344e+07	5.49873e+07
A0A384MEE7	#N/A	Epididymis secretory sperm binding protein OS=Homo sapiens OX=9606 PE=2 SV=1	31	10	25	9	1	406	46.9	5.26	83.68	10	1	3.53301e+06	2.54403e+07	2.79777e+06	9.59053e+06	4.33146e+07	7.9459e+06
A0A109PSY4	#N/A	MS-A1 light chain variable region (Fragment) OS=Homo sapiens OX=9606 PE=2 SV=1	38	3	22	3	1	106	11.4	8.48	83.42	3	0	4.85228e+06	1.13225e+07	1.63749e+07	1.53096e+07	7.03697e+06	3.8847e+06
A0A024RB85	PA2G4	Proliferation-associated 2G4, 38kDa, isoform CRA_a OS=Homo sapiens OX=9606 GN=PA2G4 PE=4 SV=1	23	7	28	7	1	394	43.8	6.55	83.36	7	0	8.30552e+06	2.24117e+07	9.69259e+06	1.35794e+07	1.10627e+07	9.40586e+06
P54920	NAPA	Alpha-soluble NSF attachment protein OS=Homo sapiens OX=9606 GN=NAPA PE=1 SV=3	46	9	24	9	1	295	33.2	5.36	83.28	9	0	3.69666e+06	8.68129e+06	3.60538e+06	8.20832e+06	6.4335e+06	5.63532e+06
C1PHA2	KIF5B-ALK	Tyrosine-protein kinase receptor OS=Homo sapiens OX=9606 GN=KIF5B-ALK PE=2 SV=1	12	13	26	13	1	1483	167.8	6.64	83.1	13	0	2.45154e+06	1.24774e+07	4.30854e+06	6.97665e+06	1.16617e+07	5.16585e+06
Q16666	IFI16	Gamma-interferon-inducible protein 16 OS=Homo sapiens OX=9606 GN=IFI16 PE=1 SV=3	16	10	28	10	1	785	88.2	9.28	83.05	10	0	5.37487e+06	1.9631e+07	8.80934e+06	2.04251e+07	1.27495e+07	1.26382e+07
F2RM37	F9	Coagulation factor IX OS=Homo sapiens OX=9606 GN=F9 p22 PE=2 SV=1	22	8	28	8	1	461	51.7	5.47	82.82	8	0	4.12901e+06	4.7999e+06	9.75319e+06	2.06157e+07	6.62635e+06	1.14072e+07
Q59FI9	#N/A	Ribosomal protein L12 variant (Fragment) OS=Homo sapiens OX=9606 PE=2 SV=1	37	5	21	5	1	197	21.5	10.1	82.78	5	0	1.05044e+07	4.87191e+07	4.71728e+06	1.37023e+07	2.29753e+07	1.35165e+07
A0A384P5K2	#N/A	Epididymis secretory sperm binding protein OS=Homo sapiens OX=9606 PE=2 SV=1	60	8	22	8	1	193	20.6	8.57	82.68	8	0	2.20493e+06	3.4964e+07	7.95346e+06	1.20341e+07	4.42976e+07	1.00655e+07
Q96IY4	CPB2	Carboxypeptidase B2 OS=Homo sapiens OX=9606 GN=CPB2 PE=1 SV=2	20	7	25	7	1	423	48.4	7.71	82.51	7	0	5.13789e+06	7.70098e+06	1.40435e+07	1.11124e+07	NA	1.22498e+07
Q92896	GLG1	Golgi apparatus protein 1 OS=Homo sapiens OX=9606 GN=GLG1 PE=1 SV=2	12	12	26	12	1	1179	134.5	6.9	82.44	12	0	3.51951e+06	2.67399e+07	5.49751e+06	7.58425e+06	6.37043e+06	6.39193e+06
Q8N7G1	#N/A	Purine nucleoside phosphorylase OS=Homo sapiens OX=9606 PE=2 SV=1	59	11	28	11	1	293	32.5	7.21	82.07	11	0	1.2862e+07	1.54595e+07	5.35065e+06	7.79635e+06	1.92275e+07	1.36495e+07
P30048	PRDX3	Thioredoxin-dependent peroxide reductase, mitochondrial OS=Homo sapiens OX=9606 GN=PRDX3 PE=1 SV=3	34	8	28	8	1	256	27.7	7.78	81.83	8	0	2.11954e+07	4.63768e+07	1.84656e+07	2.84693e+07	2.07772e+07	1.76032e+07
Q1HP67	LPA	Lipoprotein, Lp(A) OS=Homo sapiens OX=9606 GN=LPA PE=3 SV=1	19	6	25	6	1	2040	226.4	6.07	81.54	6	0	9.2114e+06	4.29589e+07	1.62105e+07	3.68645e+07	7.30145e+06	7.92129e+06
P58546	MTPN	Myotrophin OS=Homo sapiens OX=9606 GN=MTPN PE=1 SV=2	77	5	20	5	1	118	12.9	5.52	81.48	5	0	4.05061e+06	1.32888e+07	2.8115e+06	4.33864e+06	1.76687e+07	3.65278e+06
Q92930	RAB8B	Ras-related protein Rab-8B OS=Homo sapiens OX=9606 GN=RAB8B PE=1 SV=2	32	7	30	2	1	207	23.6	9.07	81.35	7	0	2.6007e+06	1.26772e+06	1.123e+06	3.71763e+06	2.19897e+06	3.08804e+06
P61006	RAB8A	Ras-related protein Rab-8A OS=Homo sapiens OX=9606 GN=RAB8A PE=1 SV=1	32	7	30	2	1	207	23.7	9.07	81.27	7	1	4.01978e+06	6.26524e+06	4.78209e+06	4932623	2.95143e+06	4.02129e+06
B3KY04	#N/A	cDNA FLJ46506 fis, clone THYMU3030752, highly similar to BTB/POZ domain-containing protein KCTD12 OS=Homo sapiens OX=9606 PE=2 SV=1	34	9	32	9	1	325	35.7	5.64	81.12	9	0	3.88279e+06	1.25581e+07	9.89589e+06	5.60966e+06	1.1491e+07	1.03051e+07
P62424	RPL7A	60S ribosomal protein L7a OS=Homo sapiens OX=9606 GN=RPL7A PE=1 SV=2	36	9	29	9	1	266	30	10.61	80.99	9	0	1.28182e+07	6.38428e+07	1.76581e+07	2.74343e+07	3.14708e+07	3.11195e+07
P16284	PECAM1	Platelet endothelial cell adhesion molecule OS=Homo sapiens OX=9606 GN=PECAM1 PE=1 SV=2	21	10	25	10	1	738	82.5	6.99	80.81	10	0	4.05626e+06	2.10314e+07	2.18738e+06	1.38047e+07	1.27218e+07	1.69502e+07
Q9GZM7	TINAGL1	Tubulointerstitial nephritis antigen-like OS=Homo sapiens OX=9606 GN=TINAGL1 PE=1 SV=1	28	9	28	9	1	467	52.4	6.99	80.58	9	0	1.53569e+06	5.43529e+06	327089	1.23858e+07	4.69079e+07	2.49026e+07
P62244	RPS15A	40S ribosomal protein S15a OS=Homo sapiens OX=9606 GN=RPS15A PE=1 SV=2	54	7	27	4	1	130	14.8	10.13	80.14	7	3	9.99587e+06	4.86043e+07	1.54476e+07	1.51451e+07	1.53048e+07	2.46266e+07
K7ES00	H3F3B	Histone H3.3 (Fragment) OS=Homo sapiens OX=9606 GN=H3F3B PE=1 SV=1	18	4	31	2	1	151	16.6	11.84	79.95	4	2	2.71219e+08	7.18449e+08	1.35893e+08	3.36073e+08	3.6453e+08	2.15413e+08
Q96KP4	CNDP2	Cytosolic non-specific dipeptidase OS=Homo sapiens OX=9606 GN=CNDP2 PE=1 SV=2	28	9	26	9	1	475	52.8	5.97	79.9	9	0	1.90535e+06	9.11465e+06	2.74816e+06	3.65784e+06	1.12313e+07	3.99511e+06
A0A024RBE8	SLC25A3	Solute carrier family 25 (Mitochondrial carrier phosphate carrier), member 3, isoform CRA_a OS=Homo sapiens OX=9606 GN=SLC25A3 PE=2 SV=1	28	8	31	8	1	361	39.9	9.36	79.73	8	0	2.23902e+07	4.25543e+07	1.8801e+07	2.72408e+07	1.90647e+07	3.283e+07
P29590	PML	Protein PML OS=Homo sapiens OX=9606 GN=PML PE=1 SV=3	20	15	28	15	1	882	97.5	6.21	79.72	15	0	5.9434e+06	3.26644e+07	7.0366e+06	1.82248e+07	2.10427e+07	8.42425e+06
D6W5K2	TMSB10	Thymosin, beta 10, isoform CRA_a (Fragment) OS=Homo sapiens OX=9606 GN=TMSB10 PE=4 SV=1	8	2	25	2	1	169	17.9	10.48	79.64	2	0	5.91085e+06	3.2162e+07	1.60627e+07	9.40853e+06	4.14416e+07	2.8294e+07
P15880	RPS2	40S ribosomal protein S2 OS=Homo sapiens OX=9606 GN=RPS2 PE=1 SV=2	28	7	28	7	1	293	31.3	10.24	79.32	7	0	8.33642e+06	6.37867e+07	1.75093e+07	2.2465e+07	2.51811e+07	2.42388e+07
B2R642	#N/A	cDNA, FLJ92775, highly similar to Homo sapiens melanoma cell adhesion molecule (MCAM), mRNA OS=Homo sapiens OX=9606 PE=2 SV=1	21	9	23	9	1	646	71.6	5.76	79.24	9	0	1.04269e+06	1.58947e+07	3.10383e+06	8.27605e+06	1.79771e+07	9.02024e+06
Q8WVX7	#N/A	Ribosomal protein S19 (Fragment) OS=Homo sapiens OX=9606 PE=2 SV=1	34	7	26	7	1	157	17.3	10.52	78.83	7	0	8.96949e+06	4.03434e+07	1.42932e+07	1.82668e+07	2.12606e+07	2.02015e+07
B2R888	#N/A	Monocyte differentiation antigen CD14 OS=Homo sapiens OX=9606 PE=2 SV=1	19	5	24	5	1	375	40	6.23	78.29	5	0	4.36337e+06	1.11658e+07	1.26347e+07	1.06068e+07	1.30534e+07	1.30872e+07
B1N7B8	#N/A	Cryocrystalglobulin CC1 kappa light chain variable region (Fragment) OS=Homo sapiens OX=9606 PE=2 SV=1	36	2	19	2	1	107	11.8	7.99	78.23	2	0	1.89997e+07	2.2236e+07	4.49349e+07	3.14375e+07	2.48535e+07	1.45157e+07
P39023	RPL3	60S ribosomal protein L3 OS=Homo sapiens OX=9606 GN=RPL3 PE=1 SV=2	13	6	33	6	1	403	46.1	10.18	78.22	6	0	1.11369e+07	3.73961e+07	1.65608e+07	1.63408e+07	2.27765e+07	1.77795e+07
A0A024RAA7	C1QC	Adiponectin B OS=Homo sapiens OX=9606 GN=C1QC PE=4 SV=1	24	6	24	6	1	245	25.8	8.41	78.09	6	0	1.09211e+07	7.7059e+07	2.46348e+07	3.47088e+07	9.19578e+06	1.95261e+07
A0A384NY87	#N/A	Epididymis secretory sperm binding protein OS=Homo sapiens OX=9606 PE=2 SV=1	10	7	24	7	1	547	59	6.89	78.07	7	0	6.87103e+06	1.75952e+07	6.91417e+06	1.38627e+07	1.02094e+07	8.30127e+06
E9PNQ8	THY1	Thy-1 membrane glycoprotein (Fragment) OS=Homo sapiens OX=9606 GN=THY1 PE=1 SV=1	24	4	24	4	1	165	18.2	9.16	77.95	4	0	5.07005e+06	3.18373e+07	7.92081e+06	1.23383e+07	3.83115e+06	7.70152e+06
Q96AG4	LRRC59	Leucine-rich repeat-containing protein 59 OS=Homo sapiens OX=9606 GN=LRRC59 PE=1 SV=1	33	7	24	7	1	307	34.9	9.57	77.86	7	0	3.59524e+06	4.6866e+07	9.67745e+06	1.21838e+07	1.35966e+07	4.4044e+06
P43652	AFM	Afamin OS=Homo sapiens OX=9606 GN=AFM PE=1 SV=1	19	8	23	8	1	599	69	5.9	77.84	8	0	3.54595e+06	3.52548e+06	6.62033e+06	3.76876e+06	1.99744e+06	2.46582e+06
A0A0B4J1X5	IGHV3-74	Immunoglobulin heavy variable 3-74 OS=Homo sapiens OX=9606 GN=IGHV3-74 PE=3 SV=1	38	4	27	2	1	117	12.8	8.66	77.74	4	0	4.53991e+06	1.14953e+07	1.59894e+07	8718322	2.34112e+06	2.45419e+06
Q15075	EEA1	Early endosome antigen 1 OS=Homo sapiens OX=9606 GN=EEA1 PE=1 SV=2	13	15	24	15	1	1411	162.4	5.68	77.63	15	0	920484	1.08686e+07	1.97014e+06	1.98805e+06	1.78603e+07	4.51852e+06
A0A024R7G2	RAB3D	Epididymis secretory sperm binding protein OS=Homo sapiens OX=9606 GN=RAB3D PE=2 SV=1	35	8	30	5	1	219	24.3	4.93	77.48	8	2	2.20815e+07	4.49589e+06	9.06559e+06	1.8729e+07	1.0635e+07	1.62912e+07
Q5U000	#N/A	Cathepsin Z OS=Homo sapiens OX=9606 PE=2 SV=1	31	7	24	7	1	303	33.8	7.11	77.41	7	0	1.25913e+07	2.76221e+07	2.56142e+07	1.38766e+07	2.85137e+07	1.23238e+07
Q99623	PHB2	Prohibitin-2 OS=Homo sapiens OX=9606 GN=PHB2 PE=1 SV=2	34	9	26	9	1	299	33.3	9.83	77.2	9	0	9.24548e+06	2.90157e+07	2.1349e+07	1.86505e+07	1.54804e+07	1.48803e+07
Q9NUQ9	FAM49B	Protein FAM49B OS=Homo sapiens OX=9606 GN=FAM49B PE=1 SV=1	31	8	25	8	1	324	36.7	6.06	76.41	8	0	1.15356e+07	2.92615e+06	4.36766e+06	3.99598e+06	8.76272e+06	2.73913e+06
Q06828	FMOD	Fibromodulin OS=Homo sapiens OX=9606 GN=FMOD PE=1 SV=2	27	7	24	7	1	376	43.2	6.04	76.38	7	0	304405	2.85095e+07	3.01884e+06	3253354	4.89042e+07	1.85202e+07
P13674	P4HA1	Prolyl 4-hydroxylase subunit alpha-1 OS=Homo sapiens OX=9606 GN=P4HA1 PE=1 SV=2	28	11	23	11	1	534	61	6.01	76.35	11	0	4.08675e+06	1.99159e+07	1.05938e+07	7.78592e+06	2.22252e+07	2.5022e+06
A0A024R571	EHD1	EH domain-containing protein 1 OS=Homo sapiens OX=9606 GN=EHD1 PE=1 SV=1	20	9	25	8	1	548	61.9	6.71	76.29	9	0	1.38088e+07	6.03756e+06	8.71121e+06	1.09836e+07	1.0244e+07	9.94503e+06
V9HWH9	HEL-S-43	Protein S100 OS=Homo sapiens OX=9606 GN=HEL-S-43 PE=2 SV=1	47	5	25	5	1	105	11.7	7.12	76.11	5	0	1.0575e+08	137343381	7.34241e+07	7.74742e+07	166151126	9.01615e+07
A0A024RAD5	DDOST	Dolichyl-diphosphooligosaccharide--protein glycosyltransferase 48 kDa subunit OS=Homo sapiens OX=9606 GN=DDOST PE=3 SV=1	29	11	30	11	1	456	50.7	6.4	76.1	11	0	7.69962e+06	4.05078e+07	8.23674e+06	19514549	1.69668e+07	1.45768e+07
P22695	UQCRC2	Cytochrome b-c1 complex subunit 2, mitochondrial OS=Homo sapiens OX=9606 GN=UQCRC2 PE=1 SV=3	21	6	21	6	1	453	48.4	8.63	76.01	6	0	8.17428e+06	1.71729e+07	7.01324e+06	1.22871e+07	1.21246e+07	9.51436e+06
Q16853	AOC3	Membrane primary amine oxidase OS=Homo sapiens OX=9606 GN=AOC3 PE=1 SV=3	19	10	26	10	1	763	84.6	6.52	75.59	10	0	NA	1.94776e+07	280083	3.51002e+06	7.7832e+07	3.66162e+07
A0A024RAB9	C1QB	Adiponectin A OS=Homo sapiens OX=9606 GN=C1QB PE=4 SV=1	31	6	25	6	1	253	26.7	8.63	75.52	6	0	1.22804e+07	2.97313e+07	1.70944e+07	2.81688e+07	5.36279e+06	3.35295e+07
A3RJH1	DDX1	ATP-dependent RNA helicase DDX1 OS=Homo sapiens OX=9606 GN=DDX1 PE=2 SV=1	16	8	22	8	1	740	82.4	7.23	75.41	8	0	1.7294e+06	1.48275e+07	1.74922e+06	3.72506e+06	8.01264e+06	1.5848e+06
A8K401	PHB	Epididymis secretory sperm binding protein OS=Homo sapiens OX=9606 GN=PHB PE=2 SV=1	32	7	24	7	1	272	29.8	5.76	75.4	7	0	1.18619e+07	3.8744e+07	1.0555e+07	1.65418e+07	2.30749e+07	1.44049e+07
Q93084	ATP2A3	Sarcoplasmic/endoplasmic reticulum calcium ATPase 3 OS=Homo sapiens OX=9606 GN=ATP2A3 PE=1 SV=2	11	8	23	4	1	1043	113.9	5.57	75.18	8	0	4.76722e+06	544106	1.25762e+06	3.31946e+06	2.16183e+06	2.6904e+06
P37840	SNCA	Alpha-synuclein OS=Homo sapiens OX=9606 GN=SNCA PE=1 SV=1	39	6	20	6	1	140	14.5	4.7	74.77	6	0	8.76565e+06	2.47806e+07	3.22449e+06	8.84393e+06	7.60881e+06	7.21469e+06
Q76LA1	CSTB	CSTB protein OS=Homo sapiens OX=9606 GN=CSTB PE=2 SV=1	70	4	25	4	1	98	11.1	7.56	74.52	4	0	1.58722e+07	1.70545e+07	1.8707e+07	1.31975e+07	4.86452e+07	2.01479e+07
Q6P4A8	PLBD1	Phospholipase B-like 1 OS=Homo sapiens OX=9606 GN=PLBD1 PE=1 SV=2	16	9	26	9	1	553	63.2	9.06	73.95	9	0	4.72607e+07	1.89861e+06	1.22677e+07	1.2186e+07	1.20458e+07	2.55974e+07
A8K9E4	#N/A	cDNA FLJ76459, highly similar to Homo sapiens matrix metallopeptidase 8 (neutrophil collagenase) (MMP8), mRNA OS=Homo sapiens OX=9606 PE=2 SV=1	28	9	24	9	1	467	53.4	6.55	73.84	9	0	4.59559e+07	2.33423e+06	9.2754e+06	8.90574e+06	1.46928e+07	1.53954e+07
V9HW90	HEL-75	Glutathione reductase OS=Homo sapiens OX=9606 GN=HEL-75 PE=2 SV=1	20	6	23	6	1	522	56.2	8.5	73.73	6	0	1.75637e+07	9.83955e+06	9.08777e+06	7.04574e+06	1.96794e+07	1.20746e+07
P07384	CAPN1	Calpain-1 catalytic subunit OS=Homo sapiens OX=9606 GN=CAPN1 PE=1 SV=1	15	9	26	9	1	714	81.8	5.67	73.56	9	0	1.98572e+07	1.57348e+07	9.1202e+06	1.37017e+07	1.36881e+07	1.51661e+07
A0A384N6A4	#N/A	Epididymis secretory sperm binding protein OS=Homo sapiens OX=9606 PE=2 SV=1	52	5	25	3	1	102	10.9	8.92	73.33	5	2	1.05595e+07	4.15688e+07	9.89841e+06	2.62002e+07	3.566e+07	1.18268e+07
B4DUP2	#N/A	UTP--glucose-1-phosphate uridylyltransferase OS=Homo sapiens OX=9606 PE=2 SV=1	29	11	24	11	1	517	57.8	8.13	73.23	11	0	1.55028e+07	1.47532e+07	9.92264e+06	7.9204e+06	1.79149e+07	1.06587e+07
Q14847	LASP1	LIM and SH3 domain protein 1 OS=Homo sapiens OX=9606 GN=LASP1 PE=1 SV=2	28	7	24	7	1	261	29.7	7.05	73.17	7	0	6.59523e+06	2.92914e+07	1.05164e+07	1.11003e+07	2.40767e+07	1.12955e+07
O60240	PLIN1	Perilipin-1 OS=Homo sapiens OX=9606 GN=PLIN1 PE=1 SV=2	39	13	22	13	1	522	56	6.42	73.11	13	0	NA	526950	NA	NA	9.81976e+07	8.05135e+06
P61163	ACTR1A	Alpha-centractin OS=Homo sapiens OX=9606 GN=ACTR1A PE=1 SV=1	33	7	23	7	1	376	42.6	6.64	73.05	7	0	2.35678e+07	3.71505e+07	3.51476e+07	2.386e+07	1.74715e+07	2.06028e+07
Q6NVC0	SLC25A5	SLC25A5 protein (Fragment) OS=Homo sapiens OX=9606 GN=SLC25A5 PE=2 SV=1	33	10	29	3	1	323	35.3	9.82	73.02	10	6	2.58665e+07	9.76261e+07	3.64818e+07	5.19194e+07	2.44428e+07	3.94033e+07
Q13423	NNT	NAD(P) transhydrogenase, mitochondrial OS=Homo sapiens OX=9606 GN=NNT PE=1 SV=3	16	11	22	11	1	1086	113.8	8.09	72.9	11	0	4.62249e+06	1.96354e+07	4.74802e+06	1.04367e+07	1.21069e+07	1.08927e+07
Q2TNI1	CAV1	Caveolin OS=Homo sapiens OX=9606 GN=CAV1 PE=2 SV=1	30	4	21	4	1	178	20.5	6.02	72.64	4	0	1.49943e+07	3.30644e+07	1.02003e+07	2.28396e+07	4.21886e+07	2.82428e+07
P38159	RBMX	RNA-binding motif protein, X chromosome OS=Homo sapiens OX=9606 GN=RBMX PE=1 SV=3	25	10	28	10	1	391	42.3	10.05	72.58	10	0	6.48006e+06	2.86548e+07	6.70628e+06	8.71933e+06	1.49661e+07	6.10738e+06
A8K3B0	#N/A	cDNA FLJ77877, highly similar to Human ENO2 neuron specific (gamma) enolase OS=Homo sapiens OX=9606 PE=2 SV=1	18	6	18	3	1	434	47.3	5.03	72.58	6	0	43908.1	886572	357830	114558	2.37336e+06	98739.1
A0A140VJG8	#N/A	Testicular tissue protein Li 42 OS=Homo sapiens OX=9606 PE=2 SV=1	23	6	20	6	1	271	30	5.47	72.07	6	0	2.01772e+06	6.60521e+06	3.71607e+06	4.21476e+06	1.04794e+07	5.64961e+06
M1LAK4	OLFML3	Olfactomedin-like 3, isoform CRA_b OS=Homo sapiens OX=9606 GN=OLFML3 PE=4 SV=1	29	9	24	9	1	406	46	6.57	71.99	9	0	5.58163e+06	3.3794e+07	5.56309e+06	8.40331e+06	1.39311e+07	7.28388e+06
Q9NVJ2	ARL8B	ADP-ribosylation factor-like protein 8B OS=Homo sapiens OX=9606 GN=ARL8B PE=1 SV=1	57	9	24	4	1	186	21.5	8.43	71.65	9	4	6.71897e+07	1.30861e+07	2.22217e+07	2.40116e+07	2.74474e+07	145834004
P00441	SOD1	Superoxide dismutase [Cu-Zn] OS=Homo sapiens OX=9606 GN=SOD1 PE=1 SV=2	58	4	14	4	1	154	15.9	6.13	71.61	4	0	4.30609e+06	1.22438e+07	2.96653e+06	2751712	1.55807e+07	4.14009e+06
B3KQF4	#N/A	cDNA FLJ90373 fis, clone NT2RP2004606, highly similar to Metalloproteinase inhibitor 1 OS=Homo sapiens OX=9606 PE=2 SV=1	54	7	22	7	1	207	23.2	8.1	71.3	7	0	1.57026e+06	5.53361e+06	3.86629e+06	5.41523e+06	7.51951e+07	3.53087e+07
Q9NQC3	RTN4	Reticulon-4 OS=Homo sapiens OX=9606 GN=RTN4 PE=1 SV=2	7	5	21	5	1	1192	129.9	4.5	71.23	5	0	1.24052e+07	2.93216e+07	1.7757e+07	21128381	2.838e+07	2.4022e+07
P02654	APOC1	Apolipoprotein C-I OS=Homo sapiens OX=9606 GN=APOC1 PE=1 SV=1	29	6	25	6	1	83	9.3	8.47	71.16	6	0	2.89511e+07	2.32449e+07	2.58482e+07	35558638	1.58276e+06	5.41336e+06
O60701	UGDH	UDP-glucose 6-dehydrogenase OS=Homo sapiens OX=9606 GN=UGDH PE=1 SV=1	25	9	23	9	1	494	55	7.12	71.07	9	0	3.72473e+06	2.12229e+07	6.3948e+06	5.14679e+06	1.98559e+07	8.43077e+06
P08514	ITGA2B	Integrin alpha-IIb OS=Homo sapiens OX=9606 GN=ITGA2B PE=1 SV=3	15	10	20	10	1	1039	113.3	5.38	70.91	10	0	3.03732e+06	1.15937e+07	845791	9.20343e+06	386536	2.70205e+07
P0C0S5	H2AFZ	Histone H2A.Z OS=Homo sapiens OX=9606 GN=H2AFZ PE=1 SV=2	31	5	25	3	1	128	13.5	10.58	70.9	5	0	4.10221e+06	2.90499e+07	1.31561e+06	6415259	9.85645e+06	1.16109e+06
Q53H88	#N/A	Dynactin 2 variant (Fragment) OS=Homo sapiens OX=9606 PE=2 SV=1	26	9	21	9	1	406	44.8	5.12	70.8	9	0	2.62509e+06	1.49628e+07	2.64066e+06	4.55502e+06	1.60619e+07	4.35809e+06
A0A024R4H0	PLOD1	Procollagen-lysine 1, 2-oxoglutarate 5-dioxygenase 1, isoform CRA_a OS=Homo sapiens OX=9606 GN=PLOD1 PE=4 SV=1	21	12	22	12	1	727	83.5	6.95	70.64	12	0	2.63601e+06	2.71378e+07	6.43668e+06	6.72884e+06	2.05728e+06	5.66015e+06
Q9Y4G6	TLN2	Talin-2 OS=Homo sapiens OX=9606 GN=TLN2 PE=1 SV=4	4	8	24	2	1	2542	271.4	5.57	70.52	8	0	NA	NA	NA	NA	1.17438e+06	NA
Q15907	RAB11B	Ras-related protein Rab-11B OS=Homo sapiens OX=9606 GN=RAB11B PE=1 SV=4	39	8	28	8	1	218	24.5	5.94	70.51	8	0	3.02953e+07	2.56107e+07	1.90333e+07	2.64707e+07	1.65256e+07	2.30459e+07
Q0Z7S6	CEACAM8	Carcinoembryonic antigen-related cell adhesion molecule 8 OS=Homo sapiens OX=9606 GN=CEACAM8 PE=2 SV=1	19	5	23	4	1	349	38.1	7.39	69.99	5	1	5.27664e+07	2.07403e+06	2.04075e+07	2.91848e+07	4.31133e+07	2.58907e+07
B2R983	#N/A	cDNA, FLJ94267, highly similar to Homo sapiens glutathione S-transferase omega 1 (GSTO1), mRNA OS=Homo sapiens OX=9606 PE=2 SV=1	27	7	26	7	1	241	27.5	6.6	69.87	7	0	1.83717e+07	2.02487e+07	1.40826e+07	1.23649e+07	5.59541e+07	1.81326e+07
B7Z809	#N/A	cDNA FLJ56016, highly similar to C-1-tetrahydrofolate synthase, cytoplasmic OS=Homo sapiens OX=9606 PE=2 SV=1	12	11	25	11	1	1020	110.4	8.56	69.7	11	0	4.38345e+06	8.08999e+06	4.80476e+06	8.90709e+06	8.82405e+06	6.96491e+06
Q32Q12	NME1-NME2	Nucleoside diphosphate kinase OS=Homo sapiens OX=9606 GN=NME1-NME2 PE=1 SV=1	49	9	25	2	1	292	32.6	8.48	69.61	9	7	1.85802e+07	7.65828e+07	2.21791e+07	2.52731e+07	4.4872e+07	2.49644e+07
D3DQH8	SPARC	Secreted protein, acidic, cysteine-rich (Osteonectin), isoform CRA_a OS=Homo sapiens OX=9606 GN=SPARC PE=4 SV=1	23	6	22	6	1	315	36	4.88	69.43	6	0	2.6379e+06	2.44545e+07	6.26713e+06	3.92172e+06	1.9291e+07	7.11646e+06
P67775	PPP2CA	Serine/threonine-protein phosphatase 2A catalytic subunit alpha isoform OS=Homo sapiens OX=9606 GN=PPP2CA PE=1 SV=1	38	9	20	9	1	309	35.6	5.54	69.29	9	0	5.63992e+06	1.0328e+07	3.17198e+06	8.34533e+06	9.38164e+06	8.2424e+06
Q8WX93	PALLD	Palladin OS=Homo sapiens OX=9606 GN=PALLD PE=1 SV=3	12	10	21	10	1	1383	150.5	7.09	69.14	10	0	989448	1.74534e+07	4.40385e+06	2.05377e+06	1.70529e+07	4.9254e+06
A0A024R5P1	PICALM	Phosphatidylinositol binding clathrin assembly protein, isoform CRA_i OS=Homo sapiens OX=9606 GN=PICALM PE=4 SV=1	9	4	19	4	1	652	70.7	7.9	68.88	4	0	367358	9.08612e+06	2.96854e+06	1.93992e+06	3.6031e+06	1.27528e+06
B2R491	RPS4X	40S ribosomal protein S4 OS=Homo sapiens OX=9606 GN=RPS4X PE=2 SV=1	40	12	26	5	1	263	29.6	10.15	68.88	12	7	6.47928e+06	4.99008e+07	1.20658e+07	16208628	1.08132e+07	1.11708e+07
A0A024R2F9	TMEM43	Transmembrane protein 43 isoform 1 OS=Homo sapiens OX=9606 GN=TMEM43 PE=2 SV=1	32	8	22	8	1	400	44.8	8.13	68.87	8	0	2.12182e+06	1.49813e+07	4.55014e+06	9.3105e+06	1.00256e+07	1.15099e+07
P31947	SFN	14-3-3 protein sigma OS=Homo sapiens OX=9606 GN=SFN PE=1 SV=1	27	6	24	4	1	248	27.8	4.74	68.69	6	0	NA	141040	NA	1.1583e+07	6.92626e+06	3.45875e+07
A5YM53	ITGAV	ITGAV protein OS=Homo sapiens OX=9606 GN=ITGAV PE=2 SV=1	16	12	21	12	1	1048	116	5.74	68.47	12	0	2.24678e+06	1.5554e+07	4.09703e+06	4.49665e+06	1.23679e+07	1.14644e+07
P27918	CFP	Properdin OS=Homo sapiens OX=9606 GN=CFP PE=1 SV=2	19	6	21	6	1	469	51.2	7.9	67.83	6	0	1.18643e+07	2.59488e+06	7.01523e+06	3.89755e+06	1.18459e+07	3.44337e+06
Q99541	PLIN2	Perilipin-2 OS=Homo sapiens OX=9606 GN=PLIN2 PE=1 SV=2	31	9	19	9	1	437	48	6.8	67.73	9	0	541291	3.36578e+06	1.70828e+06	1.00674e+06	6.12497e+07	1.11689e+07
A0A384MTI6	#N/A	Epididymis secretory sperm binding protein OS=Homo sapiens OX=9606 PE=2 SV=1	13	9	26	9	1	744	82.5	6.95	67.57	9	0	8.11369e+06	9.79541e+06	5.54697e+06	1.07245e+07	1.10285e+07	8.80395e+06
O60763	USO1	General vesicular transport factor p115 OS=Homo sapiens OX=9606 GN=USO1 PE=1 SV=2	11	9	23	9	1	962	107.8	4.91	67.27	9	0	4.17391e+06	1.32799e+07	4.99271e+06	5.26194e+06	3.92819e+06	1.72481e+06
P40925	MDH1	Malate dehydrogenase, cytoplasmic OS=Homo sapiens OX=9606 GN=MDH1 PE=1 SV=4	24	7	24	7	1	334	36.4	7.36	67.21	7	0	6.38429e+06	2.64271e+07	4.22843e+06	3.48782e+06	2.23914e+07	5.31727e+06
A0A3B3IQ51	CFHR2	Complement factor H-related protein 2 OS=Homo sapiens OX=9606 GN=CFHR2 PE=4 SV=1	33	7	20	2	1	355	39.4	6.65	66.62	7	0	947321	458157	7.26125e+06	4.83464e+06	3.41549e+06	1.61962e+06
P41091	EIF2S3	Eukaryotic translation initiation factor 2 subunit 3 OS=Homo sapiens OX=9606 GN=EIF2S3 PE=1 SV=3	26	8	22	8	1	472	51.1	8.4	66.57	8	0	6.30821e+06	2.09675e+07	4.32122e+06	1.1502e+07	1.07707e+07	6.72625e+06
P31942	HNRNPH3	Heterogeneous nuclear ribonucleoprotein H3 OS=Homo sapiens OX=9606 GN=HNRNPH3 PE=1 SV=2	20	5	22	4	1	346	36.9	6.87	66.43	5	0	2.05685e+06	1.39796e+07	2.22445e+06	3.90391e+06	5.63029e+06	1.94239e+06
A0A384P5U2	#N/A	Epididymis secretory sperm binding protein OS=Homo sapiens OX=9606 PE=2 SV=1	25	8	20	4	1	249	28.6	4.09	66.3	8	3	1.2334e+07	2.18824e+07	9.89171e+06	9.24984e+06	2.65368e+07	1.25589e+07
B4DRS6	#N/A	Sideroflexin OS=Homo sapiens OX=9606 PE=2 SV=1	44	10	23	8	1	329	36.3	9.01	66.27	10	2	1.52288e+06	1.67678e+07	3.96768e+06	9.36194e+06	8.68931e+06	7.54202e+06
Q96PD5	PGLYRP2	N-acetylmuramoyl-L-alanine amidase OS=Homo sapiens OX=9606 GN=PGLYRP2 PE=1 SV=1	24	8	19	8	1	576	62.2	7.55	66.24	8	0	2.51943e+06	3.26763e+06	4.08558e+06	4.90863e+06	1.91842e+06	3.27127e+06
B2R4D5	#N/A	Actin-related protein 2/3 complex subunit 3 OS=Homo sapiens OX=9606 PE=2 SV=1	22	4	28	4	1	178	20.5	8.59	66.2	4	0	3.18398e+07	3.30986e+07	7.14354e+06	1.62949e+07	1.84021e+07	1.14467e+07
Q16629	SRSF7	Serine/arginine-rich splicing factor 7 OS=Homo sapiens OX=9606 GN=SRSF7 PE=1 SV=1	20	4	22	3	1	238	27.4	11.82	66.03	4	0	1.09238e+07	1.95755e+07	9.44921e+06	1.00765e+07	1.93754e+07	1.06511e+07
E7EVA0	MAP4	Microtubule-associated protein OS=Homo sapiens OX=9606 GN=MAP4 PE=1 SV=1	4	7	20	7	1	2297	245.3	6.23	65.86	7	0	1.31706e+06	2.02069e+07	4.26937e+06	3.91487e+06	1.35888e+07	3.2193e+06
P05160	F13B	Coagulation factor XIII B chain OS=Homo sapiens OX=9606 GN=F13B PE=1 SV=3	18	7	21	7	1	661	75.5	6.39	65.8	7	0	4.29469e+06	1.01165e+06	8.1177e+06	2044665	467719	2.71423e+06
V9HWA6	HEL32	Epididymis luminal protein 32 OS=Homo sapiens OX=9606 GN=HEL32 PE=2 SV=1	25	4	20	4	1	165	18.5	7.85	65.8	4	0	3.27179e+06	2.70095e+07	8.49049e+06	8.89852e+06	1.83965e+07	9.4694e+06
B2RB23	#N/A	cDNA, FLJ95265, highly similar to Homo sapiens acetyl-Coenzyme A acyltransferase 2 (mitochondrial 3-oxoacyl-Coenzyme A thiolase) (ACAA2), nuclear gene encoding mitochondrial protein, mRNA OS=Homo sapiens OX=9606 PE=2 SV=1	37	11	19	11	1	397	42	8.25	65.59	11	0	1.11399e+06	1.86712e+07	1.03343e+06	5.38997e+06	2.38568e+07	2.72067e+06
Q53F64	#N/A	Heterogeneous nuclear ribonucleoprotein AB isoform a variant (Fragment) OS=Homo sapiens OX=9606 PE=2 SV=1	24	7	25	6	1	332	36	7.42	65.43	7	0	3.22539e+06	1.66768e+07	3.91813e+06	5.42563e+06	9.90344e+06	4.54073e+06
A0A0S2Z4Z9	NONO	Non-POU domain containing octamer-binding isoform 1 (Fragment) OS=Homo sapiens OX=9606 GN=NONO PE=2 SV=1	18	8	22	8	1	471	54.2	8.95	65.4	8	0	1.09829e+07	3.59071e+07	8.77641e+06	1.43486e+07	2.22443e+07	1.29568e+07
P62993	GRB2	Growth factor receptor-bound protein 2 OS=Homo sapiens OX=9606 GN=GRB2 PE=1 SV=1	37	8	24	8	1	217	25.2	6.32	64.9	8	0	2.74156e+07	2.18429e+07	3.96709e+07	2.51379e+07	5.38947e+07	4.09858e+07
D9IAI1	PEBP1	Epididymis secretory protein Li 34 OS=Homo sapiens OX=9606 GN=HEL-S-34 PE=2 SV=1	61	8	17	8	1	187	21	7.53	64.77	8	0	4.90396e+06	2.01816e+07	5.52283e+06	3.32573e+06	1.56241e+07	5.85237e+06
A0A384MTR5	#N/A	Epididymis secretory sperm binding protein OS=Homo sapiens OX=9606 PE=2 SV=1	37	12	20	12	1	456	50.2	6.42	64.58	12	0	1.48336e+06	1.98047e+07	886662	5.82537e+06	3.17102e+06	2.80736e+06
P35613	BSG	Basigin OS=Homo sapiens OX=9606 GN=BSG PE=1 SV=2	14	4	19	4	1	385	42.2	5.66	64.36	4	0	6.78832e+06	1.53433e+07	9.22253e+06	8.49954e+06	1.38653e+07	1.45398e+07
P25774	CTSS	Cathepsin S OS=Homo sapiens OX=9606 GN=CTSS PE=1 SV=3	29	7	20	7	1	331	37.5	8.34	64.34	7	0	1.18451e+07	7.91573e+06	1.36521e+07	9.79547e+06	1.25484e+07	6.48882e+06
A0A140VJJ2	ESD	S-formylglutathione hydrolase OS=Homo sapiens OX=9606 GN=ESD PE=2 SV=1	30	5	22	5	1	282	31.4	7.02	64.25	5	0	5.62106e+06	1.03791e+07	5.47852e+06	5.7538e+06	1.66969e+07	5.86004e+06
P61026	RAB10	Ras-related protein Rab-10 OS=Homo sapiens OX=9606 GN=RAB10 PE=1 SV=1	24	5	24	2	1	200	22.5	8.38	64.17	5	0	247705	1.39788e+06	497109	1.21136e+06	711474	512917
A2A274	ACO2	Aconitate hydratase, mitochondrial OS=Homo sapiens OX=9606 GN=ACO2 PE=1 SV=1	20	10	20	10	1	805	87.8	7.37	64.1	10	0	1.64738e+06	1.39473e+07	3.56108e+06	5820614	6.77144e+06	2.91687e+06
O14979	HNRNPDL	Heterogeneous nuclear ribonucleoprotein D-like OS=Homo sapiens OX=9606 GN=HNRNPDL PE=1 SV=3	14	6	24	4	1	420	46.4	9.57	63.81	6	0	1.97206e+06	7.69418e+06	2.56257e+06	2.93042e+06	5.40527e+06	2.84579e+06
A0A0X9UWL5	#N/A	GCT-A5 light chain variable region (Fragment) OS=Homo sapiens OX=9606 PE=2 SV=1	47	4	20	3	1	113	12.5	6.58	63.77	4	0	1.03235e+07	2.33412e+07	4.01201e+07	2.32464e+07	5.54671e+06	4.17262e+06
P48047	ATP5PO	ATP synthase subunit O, mitochondrial OS=Homo sapiens OX=9606 GN=ATP5PO PE=1 SV=1	48	7	19	7	1	213	23.3	9.96	63.29	7	0	3.81975e+06	2.16414e+07	4.74591e+06	9.02835e+06	1.16599e+07	8.06366e+06
V9HW41	HEL-S-71	Epididymis secretory protein Li 71 OS=Homo sapiens OX=9606 GN=HEL-S-71 PE=2 SV=1	39	6	24	6	1	152	17.1	6.57	63.18	6	0	1.23949e+07	1.62359e+07	1.0159e+07	1.30336e+07	2.18783e+07	12362696
Q59GE4	#N/A	Ribosomal protein S10 variant (Fragment) OS=Homo sapiens OX=9606 PE=4 SV=1	22	4	18	4	1	174	19.8	9.91	62.99	4	0	4.64342e+06	2.43115e+07	6.25787e+06	1.15946e+07	1.12459e+07	6.94585e+06
A0A024R5E5	TCIRG1	V-type proton ATPase subunit a OS=Homo sapiens OX=9606 GN=TCIRG1 PE=3 SV=1	10	6	19	6	1	830	92.9	7.12	62.23	6	0	5.25752e+06	2.15238e+06	1.81057e+06	4.98915e+06	4.1215e+06	4.71524e+06
Q9Y3I0	RTCB	tRNA-splicing ligase RtcB homolog OS=Homo sapiens OX=9606 GN=RTCB PE=1 SV=1	20	7	21	7	1	505	55.2	7.23	62.22	7	0	2.52619e+06	1.38526e+07	3.79488e+06	5.84451e+06	1.03972e+07	8.9213e+06
A0A096LPE2	SAA2-SAA4	SAA2-SAA4 readthrough OS=Homo sapiens OX=9606 GN=SAA2-SAA4 PE=4 SV=1	19	3	18	2	1	208	23.3	8.98	61.99	3	0	1.10493e+07	8.71786e+06	1.07047e+07	1.23657e+07	4.58227e+06	1.54099e+07
Q13228	SELENBP1	Methanethiol oxidase OS=Homo sapiens OX=9606 GN=SELENBP1 PE=1 SV=2	30	10	20	10	1	472	52.4	6.37	61.66	10	0	7.54068e+06	1.14982e+07	3.90441e+06	6.69318e+06	1.22275e+07	1.12876e+07
P54136	RARS	Arginine--tRNA ligase, cytoplasmic OS=Homo sapiens OX=9606 GN=RARS PE=1 SV=2	18	10	22	10	1	660	75.3	6.68	61.56	10	0	6.42845e+06	1.65953e+07	3.62727e+06	5.49062e+06	6.50161e+06	5.57369e+06
A0A024R7B7	CDC37	CDC37 cell division cycle 37 homolog (S. cerevisiae), isoform CRA_a OS=Homo sapiens OX=9606 GN=CDC37 PE=4 SV=1	22	5	17	5	1	378	44.4	5.25	61.56	5	0	6.33159e+06	9.5111e+06	3.23588e+06	3.73808e+06	1.24244e+06	1.0369e+06
A0A1U9X9A3	#N/A	VARS OS=Homo sapiens OX=9606 PE=1 SV=1	12	11	20	11	1	1264	140.4	7.59	61.34	11	0	1.91742e+06	9.30177e+06	2.92507e+06	3.0405e+06	7.28257e+06	3.28344e+06
A0A1W6IYI5	#N/A	N90-VRC38.08 heavy chain variable region (Fragment) OS=Homo sapiens OX=9606 PE=2 SV=1	24	2	17	2	1	124	13.5	6.77	61.13	2	0	1.16841e+07	1.57528e+07	1.62312e+07	1.33447e+07	5.29393e+06	4.7779e+06
A0A0X9UWK7	#N/A	MS-D4 heavy chain variable region (Fragment) OS=Homo sapiens OX=9606 PE=2 SV=1	50	5	18	2	1	122	13.5	7.12	60.98	5	3	3.46065e+07	4.28948e+07	1.13937e+08	7.12116e+07	3.00544e+07	2.36491e+07
A0A024R9D3	RPL30	Ribosomal protein L30, isoform CRA_b OS=Homo sapiens OX=9606 GN=RPL30 PE=3 SV=1	41	3	17	3	1	115	12.8	9.63	60.96	3	0	8.23507e+06	5.53355e+07	4.77604e+06	5.91927e+06	1.74426e+07	4.28181e+06
O00764	PDXK	Pyridoxal kinase OS=Homo sapiens OX=9606 GN=PDXK PE=1 SV=1	19	4	17	4	1	312	35.1	6.13	60.9	4	0	3.85575e+06	3.41766e+06	2.61698e+06	5.46852e+06	7.29569e+06	3.72652e+06
Q9Y394	DHRS7	Dehydrogenase/reductase SDR family member 7 OS=Homo sapiens OX=9606 GN=DHRS7 PE=1 SV=1	15	4	18	4	1	339	38.3	8.32	60.77	4	0	1.36378e+07	5.01537e+06	4.90021e+06	8.36978e+06	7.64136e+06	8.53296e+06
A0A024RA94	MFAP2	Microfibrillar-associated protein 2, isoform CRA_d OS=Homo sapiens OX=9606 GN=MFAP2 PE=4 SV=1	21	3	20	3	1	183	20.8	4.97	60.48	3	0	5.19112e+06	2.51111e+07	1.36164e+07	2.21447e+07	5.54224e+07	3.34293e+07
Q9UHD8	43717	Septin-9 OS=Homo sapiens OX=9606 GN=SEPT9 PE=1 SV=2	27	10	19	10	1	586	65.4	8.97	60.47	10	0	1.66906e+06	2.16708e+07	3.77155e+06	4.50326e+06	1.11447e+07	3.45389e+06
P22090	RPS4Y1	40S ribosomal protein S4, Y isoform 1 OS=Homo sapiens OX=9606 GN=RPS4Y1 PE=1 SV=2	30	9	21	2	1	263	29.4	10.24	60.45	9	0	NA	2.11002e+06	NA	NA	NA	NA
E9PIE3	CAVIN3	Caveolae-associated protein 3 OS=Homo sapiens OX=9606 GN=CAVIN3 PE=1 SV=1	20	5	18	5	1	293	31.1	6.81	60.26	5	0	627784	2.38167e+07	2.03354e+06	8.24042e+06	2.66581e+07	7.04471e+06
A2NB44	IGH@	Cold agglutinin FS-2 H-chain (Fragment) OS=Homo sapiens OX=9606 GN=IGH@ PE=2 SV=1	29	4	21	4	1	114	12.8	7.11	60.21	4	0	1.75563e+07	2.57828e+07	5.79663e+07	4.70357e+07	2.37638e+06	4.56141e+06
A4D0V4	CAPZA2	Capping protein (Actin filament) muscle Z-line, alpha 2 OS=Homo sapiens OX=9606 GN=CAPZA2 PE=2 SV=1	37	6	18	4	1	286	32.9	5.85	59.96	6	0	912604	2.56714e+06	1.14103e+06	1.07044e+06	1.14622e+06	928109
P12724	RNASE3	Eosinophil cationic protein OS=Homo sapiens OX=9606 GN=RNASE3 PE=1 SV=2	26	4	20	4	1	160	18.4	10.02	59.65	4	0	3.5076e+07	6.27601e+07	4.42745e+06	1.21146e+07	2.7873e+07	1.16669e+07
G3V3D1	NPC2	NPC intracellular cholesterol transporter 2 (Fragment) OS=Homo sapiens OX=9606 GN=NPC2 PE=1 SV=1	22	3	16	3	1	221	23.7	6.73	59.64	3	0	6.67107e+06	3.27964e+06	4.95153e+06	3.94963e+06	8.00857e+06	4.34552e+06
P48059	LIMS1	LIM and senescent cell antigen-like-containing domain protein 1 OS=Homo sapiens OX=9606 GN=LIMS1 PE=1 SV=4	27	7	19	7	1	325	37.2	8.05	59.54	7	0	1.05555e+06	1.46968e+07	3.6343e+06	7.2359e+06	8.02811e+06	9.4107e+06
B4DPD5	#N/A	Ubiquitin thioesterase OS=Homo sapiens OX=9606 PE=2 SV=1	17	4	20	4	1	308	35.2	5.59	59.41	4	0	3.23714e+06	4.00052e+06	2.80581e+06	3.02558e+06	6.60975e+06	3.4804e+06
P14550	AKR1A1	Alcohol dehydrogenase [NADP(+)] OS=Homo sapiens OX=9606 GN=AKR1A1 PE=1 SV=3	35	8	19	7	1	325	36.6	6.79	59.21	8	1	3.0508e+06	9.98647e+06	4.06417e+06	4.90187e+06	5.57951e+06	3.15511e+06
A0A024R5H0	BANF1	Barrier to autointegration factor 1, isoform CRA_a OS=Homo sapiens OX=9606 GN=BANF1 PE=4 SV=1	72	7	21	7	1	89	10.1	6.09	58.53	7	0	8.85843e+06	2.38408e+07	7.24709e+06	1.20459e+07	3.4951e+07	1.565e+07
A8MXP9	MATR3	Matrin-3 OS=Homo sapiens OX=9606 GN=MATR3 PE=1 SV=1	15	10	20	10	1	895	99.9	6.04	58.44	10	0	3.53053e+06	1.18432e+07	3.23395e+06	5.38036e+06	7.68262e+06	5.73665e+06
P17858	PFKL	ATP-dependent 6-phosphofructokinase, liver type OS=Homo sapiens OX=9606 GN=PFKL PE=1 SV=6	12	7	15	7	1	780	85	7.5	58.28	7	0	114590	6.54723e+06	2.73006e+06	6.61134e+06	4.0558e+06	2.01085e+06
Q5JR94	RPS8	40S ribosomal protein S8 OS=Homo sapiens OX=9606 GN=RPS8 PE=2 SV=1	48	9	21	9	1	208	24.2	10.32	58.22	9	0	6.18723e+06	5.11933e+07	6.01971e+06	1.13412e+07	1.00878e+07	1.04411e+07
A8K7Q1	#N/A	cDNA FLJ77770, highly similar to Homo sapiens nucleobindin 1 (NUCB1), mRNA OS=Homo sapiens OX=9606 PE=2 SV=1	19	8	21	8	1	461	53.9	5.25	57.79	8	0	1.84309e+07	3.16555e+07	3.32739e+07	2.55281e+07	1.77358e+07	1.16383e+07
P05997	COL5A2	Collagen alpha-2(V) chain OS=Homo sapiens OX=9606 GN=COL5A2 PE=1 SV=3	8	8	17	8	1	1499	144.8	6.46	57.68	8	0	7.50817e+06	2.70871e+07	8.6672e+06	1.36347e+07	7.92074e+06	9.25875e+06
A0A024R4M0	RPS9	40S ribosomal protein S9 OS=Homo sapiens OX=9606 GN=RPS9 PE=1 SV=1	30	7	26	7	1	194	22.6	10.65	57.58	7	0	1.98995e+07	5.6266e+07	2.59234e+07	3.21878e+07	3.33064e+07	3.23415e+07
A0A0J9YXN7	PLIN4	Perilipin-4 OS=Homo sapiens OX=9606 GN=PLIN4 PE=1 SV=1	24	16	16	6	1	1372	135.9	8.82	57.5	16	8	818652	1.27202e+06	NA	412485	2.95489e+07	754472
Q59GX2	#N/A	Solute carrier family 2 (Facilitated glucose transporter), member 1 variant (Fragment) OS=Homo sapiens OX=9606 PE=2 SV=1	8	4	22	3	1	517	57	9.47	57.41	4	0	8.33444e+06	1.48156e+07	1.54261e+06	9.27369e+06	3215845	1.08907e+07
Q15417	CNN3	Calponin-3 OS=Homo sapiens OX=9606 GN=CNN3 PE=1 SV=1	27	8	20	7	1	329	36.4	6.05	57.26	8	0	213259	1.21963e+07	2.09736e+06	965985	1.17886e+07	1.20976e+06
A0A2U8J8Q6	IgH	Ig heavy chain variable region (Fragment) OS=Homo sapiens OX=9606 GN=IgH PE=2 SV=1	23	2	17	2	1	94	10.4	7.97	57.19	2	0	1.04609e+07	1.47197e+07	4.25076e+07	26842935	7.02901e+06	8.68355e+06
O94973	AP2A2	AP-2 complex subunit alpha-2 OS=Homo sapiens OX=9606 GN=AP2A2 PE=1 SV=2	10	8	19	2	1	939	103.9	6.96	57.07	8	0	NA	2.36234e+06	781605	822805	2.26483e+06	322055
A0A0K0K1L8	HEL-S-129m	Epididymis secretory sperm binding protein Li 129m OS=Homo sapiens OX=9606 GN=HEL-S-129m PE=2 SV=1	36	7	22	7	1	249	28.7	6.02	56.94	7	0	1.94461e+07	6.38471e+07	2.45759e+07	3.09919e+07	5.71979e+07	1.41155e+07
P35998	PSMC2	26S proteasome regulatory subunit 7 OS=Homo sapiens OX=9606 GN=PSMC2 PE=1 SV=3	27	7	18	7	1	433	48.6	5.95	56.9	7	0	3.69594e+06	1.04523e+07	3.13589e+06	6.71508e+06	1.1896e+07	7.20037e+06
F8WF69	CLTA	Clathrin light chain OS=Homo sapiens OX=9606 GN=CLTA PE=1 SV=1	8	3	20	3	1	260	27.8	4.91	56.82	3	0	9.38064e+06	1.54296e+07	4.95395e+06	7.60007e+06	8.00181e+06	9.98318e+06
J3KTL2	SRSF1	Serine/arginine-rich-splicing factor 1 OS=Homo sapiens OX=9606 GN=SRSF1 PE=1 SV=1	26	6	21	6	1	253	28.3	10.08	56.5	6	0	9.30899e+06	2.55341e+07	7.34514e+06	9.24534e+06	1.64114e+07	8.20755e+06
A2A3R6	RPS6	40S ribosomal protein S6 OS=Homo sapiens OX=9606 GN=RPS6 PE=2 SV=1	18	5	21	5	1	249	28.7	10.84	56.46	5	0	1.53365e+07	5.43173e+07	2.01429e+07	2.72241e+07	2.39622e+07	2.33557e+07
D3DRP5	C9orf19	Chromosome 9 open reading frame 19, isoform CRA_a (Fragment) OS=Homo sapiens OX=9606 GN=C9orf19 PE=4 SV=1	16	4	15	4	1	351	37.8	10.84	56.45	4	0	1.35709e+07	4.45156e+06	4.16075e+06	5.44086e+06	3.92496e+06	2.89864e+06
Q59HH3	#N/A	Trifunctional purine biosynthetic protein adenosine-3 (Fragment) OS=Homo sapiens OX=9606 PE=2 SV=1	11	7	16	7	1	1046	112.1	7.36	56.41	7	0	464185	4.72059e+06	1.49626e+06	1.37549e+06	3.83257e+06	459252
Q9NYU2	UGGT1	UDP-glucose:glycoprotein glucosyltransferase 1 OS=Homo sapiens OX=9606 GN=UGGT1 PE=1 SV=3	9	9	20	9	1	1555	177.1	5.63	56.29	9	0	2.53142e+06	8.76844e+06	1.91152e+06	5.33034e+06	4.8167e+06	4.36781e+06
P10599	TXN	Thioredoxin OS=Homo sapiens OX=9606 GN=TXN PE=1 SV=3	32	3	20	3	1	105	11.7	4.92	56.23	3	0	2.84821e+07	2.34032e+07	2.20076e+07	1.58772e+07	3.32669e+07	1.7626e+07
A0A024R994	CPNE3	Copine III, isoform CRA_a OS=Homo sapiens OX=9606 GN=CPNE3 PE=4 SV=1	17	9	23	8	1	537	60.1	5.85	56.15	9	1	3.03608e+07	7.98101e+06	9.68504e+06	1.86354e+07	1.73221e+07	1.50925e+07
P62081	RPS7	40S ribosomal protein S7 OS=Homo sapiens OX=9606 GN=RPS7 PE=1 SV=1	36	5	17	2	1	194	22.1	10.1	55.99	5	3	629749	1.38594e+07	1.56131e+06	1.9553e+06	2.0727e+06	2.73192e+06
A0A0S2Z3Y1	LGALS3BP	Lectin galactoside-binding soluble 3 binding protein isoform 1 (Fragment) OS=Homo sapiens OX=9606 GN=LGALS3BP PE=2 SV=1	16	6	17	6	1	585	65.3	5.27	55.79	6	0	2.39939e+06	9.93501e+06	4.11487e+06	4.46266e+06	5.50166e+06	3.43858e+06
A0A384N6G7	#N/A	Epididymis secretory sperm binding protein OS=Homo sapiens OX=9606 PE=2 SV=1	26	7	18	7	1	344	37.4	6.24	55.59	7	0	9.78585e+06	6.0414e+06	2.54664e+06	7.17116e+06	8.86405e+06	8.74513e+06
P50570	DNM2	Dynamin-2 OS=Homo sapiens OX=9606 GN=DNM2 PE=1 SV=2	14	10	17	10	1	870	98	7.44	55.23	10	0	5.09162e+06	7.1945e+06	2.88835e+06	7.06681e+06	6.6519e+06	5.52506e+06
A0A024RB75	CS	Citrate synthase OS=Homo sapiens OX=9606 GN=CS PE=3 SV=1	16	6	18	6	1	466	51.7	8.32	55.19	6	0	1.59907e+06	1.65715e+07	4.77811e+06	9.72295e+06	4.34493e+06	1.6856e+06
P31040	SDHA	Succinate dehydrogenase [ubiquinone] flavoprotein subunit, mitochondrial OS=Homo sapiens OX=9606 GN=SDHA PE=1 SV=2	23	9	17	9	1	664	72.6	7.39	54.9	9	0	1.10321e+07	1.53954e+07	5.33881e+06	7.52591e+06	7.90545e+06	5.01649e+06
P14868	DARS	Aspartate--tRNA ligase, cytoplasmic OS=Homo sapiens OX=9606 GN=DARS PE=1 SV=2	24	9	20	9	1	501	57.1	6.55	54.84	9	0	5.67938e+06	1.49749e+07	9.46029e+06	1.01204e+07	1.09178e+07	1.06002e+07
A0A384MDY0	CTNNA1	Catenin (Cadherin-associated protein), alpha 1, 102kDa, isoform CRA_b OS=Homo sapiens OX=9606 GN=CTNNA1 PE=2 SV=1	16	9	17	9	1	906	100	6.29	54.73	9	0	1.03104e+06	4.75926e+06	2.07314e+06	2.14775e+06	3.71529e+06	3.03448e+06
Q6FGZ3	EPHX1	EPHX1 protein (Fragment) OS=Homo sapiens OX=9606 GN=EPHX1 PE=2 SV=1	19	6	19	6	1	455	52.9	7.25	54.67	6	0	4.01875e+06	1.18286e+07	6.30793e+06	6.94671e+06	9.95226e+06	9.90312e+06
Q59EF6	#N/A	Calpain 2, large [catalytic] subunit variant (Fragment) OS=Homo sapiens OX=9606 PE=2 SV=1	22	10	15	10	1	729	83.1	5.06	54.66	10	0	267165	1.68462e+07	3.53941e+06	4.76195e+06	4.2407e+06	505984
P40763	STAT3	Signal transducer and activator of transcription 3 OS=Homo sapiens OX=9606 GN=STAT3 PE=1 SV=2	15	8	18	8	1	770	88	6.3	54.58	8	0	2.37803e+06	6.29965e+06	1.61097e+06	4.00782e+06	2.07105e+06	3.24678e+06
H7BY58	PCMT1	Protein-L-isoaspartate O-methyltransferase OS=Homo sapiens OX=9606 GN=PCMT1 PE=1 SV=1	27	5	16	5	1	286	30.3	6.73	54.2	5	0	1.05299e+07	8.4914e+06	2.91421e+06	8.92436e+06	1.05012e+07	5.57212e+06
P62633	CNBP	Cellular nucleic acid-binding protein OS=Homo sapiens OX=9606 GN=CNBP PE=1 SV=1	39	5	16	5	1	177	19.5	7.71	54.17	5	0	3.74509e+06	9.47291e+06	2.27803e+06	2.58063e+06	6.83134e+06	2.48575e+06
P26373	RPL13	60S ribosomal protein L13 OS=Homo sapiens OX=9606 GN=RPL13 PE=1 SV=4	18	5	23	5	1	211	24.2	11.65	53.97	5	0	5.84958e+06	6.37408e+07	7.85472e+06	1.26008e+07	2.16054e+07	8.81045e+06
P41250	GARS	Glycine--tRNA ligase OS=Homo sapiens OX=9606 GN=GARS PE=1 SV=3	14	9	20	9	1	739	83.1	7.03	53.86	9	0	5.56168e+06	1.33211e+07	4.02814e+06	4.57304e+06	6.97533e+06	6.17022e+06
A0A087X2I1	PSMC6	26S proteasome regulatory subunit 10B OS=Homo sapiens OX=9606 GN=PSMC6 PE=1 SV=1	32	8	18	8	1	403	45.8	7.78	53.63	8	0	2.80531e+06	1.04786e+07	2.65546e+06	6.70638e+06	1.05199e+07	5.01744e+06
P13688	CEACAM1	Carcinoembryonic antigen-related cell adhesion molecule 1 OS=Homo sapiens OX=9606 GN=CEACAM1 PE=1 SV=2	12	4	16	3	1	526	57.5	5.97	53.6	4	0	1.10886e+07	NA	3.20417e+06	4.731e+06	3.21951e+06	4.1802e+06
P05198	EIF2S1	Eukaryotic translation initiation factor 2 subunit 1 OS=Homo sapiens OX=9606 GN=EIF2S1 PE=1 SV=3	35	7	17	7	1	315	36.1	5.08	53.52	7	0	3.26422e+06	1.77594e+07	3.77964e+06	5.33335e+06	5.87272e+06	5.02882e+06
O00468	AGRN	Agrin OS=Homo sapiens OX=9606 GN=AGRN PE=1 SV=6	8	11	18	11	1	2068	217.2	6.39	53.52	11	0	NA	7.26193e+06	533173	3.95626e+06	8.1602e+06	2.28961e+06
A0A075B6R2	IGHV4-4	Immunoglobulin heavy variable 4-4 OS=Homo sapiens OX=9606 GN=IGHV4-4 PE=3 SV=2	32	2	14	2	1	117	12.8	9.6	53.47	2	0	1.18311e+07	1.64334e+07	4.56686e+07	3.52455e+07	2.82535e+06	3.25423e+06
D0PNI2	LOX	Lysyl oxidase OS=Homo sapiens OX=9606 GN=LOX PE=4 SV=1	14	4	15	4	1	417	46.9	8.09	53.35	4	0	470220	1.17338e+07	2.00108e+06	1.7501e+06	1.32955e+07	6.58717e+06
Q6NUK7	LYN	Tyrosine-protein kinase (Fragment) OS=Homo sapiens OX=9606 GN=LYN PE=2 SV=1	16	9	21	6	1	582	65.8	9.09	53.11	9	3	8.68854e+06	3.90309e+06	4.60635e+06	1.40333e+07	4.08905e+06	1.42718e+07
A0A024R1U4	RAB5C	RAB5C, member RAS oncogene family, isoform CRA_a OS=Homo sapiens OX=9606 GN=RAB5C PE=4 SV=1	42	7	15	4	1	216	23.5	8.41	53.09	7	3	1.26178e+07	1.75789e+07	1.25522e+07	1.66983e+07	1.70079e+07	1.56618e+07
P07360	C8G	Complement component C8 gamma chain OS=Homo sapiens OX=9606 GN=C8G PE=1 SV=3	40	5	16	5	1	202	22.3	8.31	53.09	5	0	5.8836e+06	4.99444e+06	8.97181e+06	9.86518e+06	5.08815e+06	1.26623e+07
P08729	KRT7	Keratin, type II cytoskeletal 7 OS=Homo sapiens OX=9606 GN=KRT7 PE=1 SV=5	14	7	21	4	1	469	51.4	5.48	53.05	7	0	NA	347403	NA	NA	3.12075e+06	NA
A0A024RDE8	PDLIM5	PDZ and LIM domain 5, isoform CRA_c OS=Homo sapiens OX=9606 GN=PDLIM5 PE=4 SV=1	11	6	18	6	1	596	63.9	8.21	52.97	6	0	917491	7.75115e+06	3.83279e+06	2.8948e+06	8.9939e+06	3.69513e+06
P07686	HEXB	Beta-hexosaminidase subunit beta OS=Homo sapiens OX=9606 GN=HEXB PE=1 SV=3	17	7	19	7	1	556	63.1	6.76	52.92	7	0	2.83211e+06	7.03953e+07	4.78528e+06	4.59975e+06	6.04974e+06	4.97143e+06
Q14203	DCTN1	Dynactin subunit 1 OS=Homo sapiens OX=9606 GN=DCTN1 PE=1 SV=3	6	7	19	7	1	1278	141.6	5.81	52.77	7	0	4.03872e+06	8.35362e+06	3.32616e+06	4.41872e+06	1.22908e+07	5.42705e+06
B0I1T2	MYO1G	Unconventional myosin-Ig OS=Homo sapiens OX=9606 GN=MYO1G PE=1 SV=2	12	8	17	8	1	1018	116.4	8.73	52.62	8	0	6.74541e+06	1.22649e+06	2.28289e+06	7.09992e+06	3.82782e+06	3.9047e+06
Q6FGH9	DNCL1	Dynein light chain OS=Homo sapiens OX=9606 GN=DNCL1 PE=2 SV=1	63	4	20	4	1	89	10.4	7.4	52.54	4	0	6.31804e+06	1.74114e+07	1.02592e+07	1.28119e+07	9.92472e+06	1.48101e+07
A6NMH8	CD81	Tetraspanin OS=Homo sapiens OX=9606 GN=CD81 PE=1 SV=1	22	3	12	3	1	274	29.8	6.92	52.52	3	0	831700	2.24399e+07	4.94055e+06	7.64262e+06	9.58495e+06	6.99184e+06
B7Z5J8	#N/A	cDNA FLJ56136, highly similar to Solute carrier family 2, facilitated glucosetransporter member 14 OS=Homo sapiens OX=9606 PE=2 SV=1	8	4	21	3	1	535	58.2	7.8	52.47	4	1	1.31471e+07	1.04489e+07	6.77725e+06	19998550	9.11571e+06	1.91573e+07
A0A384NPW1	#N/A	Epididymis secretory sperm binding protein OS=Homo sapiens OX=9606 PE=2 SV=1	34	7	16	7	1	240	26.8	4.73	52.46	7	0	10793952	1.35922e+07	5.49059e+06	6.39555e+06	1.77663e+07	4.05288e+06
A0A109NGN6	#N/A	Proteasome subunit alpha type OS=Homo sapiens OX=9606 PE=2 SV=1	21	4	15	4	1	241	26.4	4.79	52.42	4	0	1.21929e+07	1.65489e+07	6.42909e+06	7.84979e+06	1.52028e+07	9.15462e+06
Q9UBG0	MRC2	C-type mannose receptor 2 OS=Homo sapiens OX=9606 GN=MRC2 PE=1 SV=2	9	9	16	9	1	1479	166.6	5.83	52.29	9	0	653712	8.63813e+06	1.61581e+06	1.06577e+06	2.36254e+06	1.36446e+06
Q15691	MAPRE1	Microtubule-associated protein RP/EB family member 1 OS=Homo sapiens OX=9606 GN=MAPRE1 PE=1 SV=3	28	5	15	5	1	268	30	5.14	52.26	5	0	4.79286e+06	1.27363e+07	4.60315e+06	5.31126e+06	7.20137e+06	5.3396e+06
Q8IZ83	ALDH16A1	Aldehyde dehydrogenase family 16 member A1 OS=Homo sapiens OX=9606 GN=ALDH16A1 PE=1 SV=2	11	6	17	6	1	802	85.1	6.79	52.03	6	0	1.59812e+06	4.13472e+06	601915	2.63619e+06	3.39709e+06	3.05701e+06
P42224	STAT1	Signal transducer and activator of transcription 1-alpha/beta OS=Homo sapiens OX=9606 GN=STAT1 PE=1 SV=2	15	8	16	8	1	750	87.3	6.05	52	8	0	1.59537e+06	4.88273e+06	3.33276e+06	5.18919e+06	4.4032e+06	2.84984e+06
P63220	RPS21	40S ribosomal protein S21 OS=Homo sapiens OX=9606 GN=RPS21 PE=1 SV=1	64	5	15	5	1	83	9.1	8.5	51.92	5	0	5.96157e+06	3.87121e+07	6.89883e+06	7.10462e+06	9.43104e+06	8.3986e+06
A0A024RDY0	RANBP5	RAN binding protein 5, isoform CRA_d OS=Homo sapiens OX=9606 GN=RANBP5 PE=4 SV=1	11	10	20	10	1	1097	123.6	4.94	51.74	10	0	2.09539e+06	6.03449e+06	2.35821e+06	2.71606e+06	1.55066e+06	2.41615e+06
J3KPF3	SLC3A2	4F2 cell-surface antigen heavy chain OS=Homo sapiens OX=9606 GN=SLC3A2 PE=1 SV=1	12	5	17	5	1	631	68.1	5.05	51.64	5	0	2.86837e+06	4.42473e+06	1.12884e+06	3.81104e+06	4.37109e+06	5.91632e+06
D3DSQ1	ASAH1	N-acylsphingosine amidohydrolase (Acid ceramidase) 1, isoform CRA_c OS=Homo sapiens OX=9606 GN=ASAH1 PE=4 SV=1	13	5	15	5	1	546	60.6	8.81	51.55	5	0	7.17161e+06	6.0053e+06	2.92562e+06	4.13872e+06	5.99241e+06	8.81647e+06
B9EKV4	#N/A	Aldehyde dehydrogenase 9 family, member A1 OS=Homo sapiens OX=9606 GN=ALDH9A1 PE=2 SV=1	19	7	16	7	1	518	56.3	6.57	51.43	7	0	1.85067e+06	9.00677e+06	1.56651e+06	3.59427e+06	1.24675e+07	5.07225e+06
Q13263	TRIM28	Transcription intermediary factor 1-beta OS=Homo sapiens OX=9606 GN=TRIM28 PE=1 SV=5	23	9	15	9	1	835	88.5	5.77	51.42	9	0	642924	1.18267e+07	1.81021e+06	3.87353e+06	6.92531e+06	1.17915e+06
A0A384N6C2	IMPDH	Epididymis secretory sperm binding protein OS=Homo sapiens OX=9606 PE=2 SV=1	11	4	16	4	1	514	55.8	6.9	51.36	4	0	4.89121e+06	7.3737e+06	4.57458e+06	8.35747e+06	9.91454e+06	9.54071e+06
Q6IB54	ATP5J	ATP synthase-coupling factor 6, mitochondrial OS=Homo sapiens OX=9606 GN=ATP5J PE=2 SV=1	48	4	14	4	1	108	12.6	9.52	51.04	4	0	2.64408e+06	1.03465e+07	2.44752e+06	3.58382e+06	1.0166e+07	2.50501e+06
P01591	JCHAIN	Immunoglobulin J chain OS=Homo sapiens OX=9606 GN=JCHAIN PE=1 SV=4	29	5	20	5	1	159	18.1	5.24	51.04	5	0	2.42827e+07	2.41125e+07	1.66454e+07	1.65319e+07	1.32761e+07	9.53918e+06
A0A024RCM3	hCG_2005638	DDX39B OS=Homo sapiens OX=9606 GN=hCG_2005638 PE=4 SV=1	28	8	20	8	1	428	49	5.67	50.74	8	0	2.14964e+06	2.77875e+07	3.03166e+06	9.88229e+06	9.69916e+06	4.32078e+06
P30626	SRI	Sorcin OS=Homo sapiens OX=9606 GN=SRI PE=1 SV=1	30	5	15	5	1	198	21.7	5.59	50.64	5	0	1.47344e+07	2.30303e+07	6.53297e+06	22778194	2.09352e+07	1.44974e+07
A0A068LL60	#N/A	Ig heavy chain variable region (Fragment) OS=Homo sapiens OX=9606 PE=2 SV=1	32	3	16	2	1	120	13.3	7.93	50.4	3	1	2.58324e+07	2.23159e+07	9.17948e+07	4.49762e+07	1.18553e+07	1.24429e+07
B5ME19	EIF3CL	Eukaryotic translation initiation factor 3 subunit C-like protein OS=Homo sapiens OX=9606 GN=EIF3CL PE=3 SV=1	12	10	19	10	1	914	105.4	5.64	50.32	10	0	1.21341e+07	1.27346e+07	2.67738e+06	7.0621e+06	4.40049e+06	1.18991e+07
A0A0B4J2C3	TPT1	Translationally-controlled tumor protein OS=Homo sapiens OX=9606 GN=TPT1 PE=1 SV=1	21	4	14	4	1	197	22.6	5.24	50.21	4	0	2.3294e+06	1.77388e+07	2.25902e+06	4.28267e+06	1.01545e+07	1.64901e+06
F8WCF6	ARPC4-TTLL3	Actin-related protein 2/3 complex subunit 4 OS=Homo sapiens OX=9606 GN=ARPC4-TTLL3 PE=3 SV=1	21	4	22	2	1	181	21	8.76	50.2	4	2	5.09316e+07	3.49991e+07	2.99991e+07	3.38367e+07	4.12974e+07	4.1406e+07
M0QYN0	MYDGF	Myeloid-derived growth factor OS=Homo sapiens OX=9606 GN=MYDGF PE=1 SV=1	19	3	15	3	1	189	20.4	5.3	50.15	3	0	5.07333e+06	1.17309e+07	1.07793e+07	1.0564e+07	1.25529e+07	7.92069e+06
C9JRZ6	CHCHD3	MICOS complex subunit OS=Homo sapiens OX=9606 GN=CHCHD3 PE=1 SV=2	28	7	17	7	1	232	26.7	7.75	49.82	7	0	4.49589e+06	1.3517e+07	5.40229e+06	6.04905e+06	1.73791e+07	8.26809e+06
A0A386NEX7	BST1	Bone marrow stromal cell antigen 1 variant 2 OS=Homo sapiens OX=9606 GN=BST1 PE=2 SV=1	25	7	16	7	1	333	37.5	7.97	49.81	7	0	2.49135e+07	1.29059e+06	6.82181e+06	1.26428e+07	1.13075e+07	3.62492e+06
A2NKM7	#N/A	NANUC-2 heavy chain (Fragment) OS=Homo sapiens OX=9606 PE=2 SV=1	31	4	17	2	1	133	14.6	9.64	49.79	4	0	1.0113e+06	957604	3.2019e+06	2.20343e+06	NA	472975
P0DME0	SETSIP	Protein SETSIP OS=Homo sapiens OX=9606 GN=SETSIP PE=1 SV=1	12	3	15	3	1	302	34.9	4.31	49.59	3	0	3.68378e+06	2.61908e+07	8.62839e+06	1.11845e+07	2.96737e+07	1.45993e+07
Q9Y5M8	SRPRB	Signal recognition particle receptor subunit beta OS=Homo sapiens OX=9606 GN=SRPRB PE=1 SV=3	30	7	15	7	1	271	29.7	9.04	49.59	7	0	1.73318e+06	1.1836e+07	1.85678e+06	3.78431e+06	782453	481328
Q6FIC5	CLIC4	Chloride intracellular channel protein OS=Homo sapiens OX=9606 GN=CLIC4 PE=2 SV=1	30	6	15	5	1	253	28.8	5.59	49.52	6	1	3.69654e+06	1.49434e+07	8.49557e+06	7.46226e+06	1.27587e+07	8.28595e+06
P23368	ME2	NAD-dependent malic enzyme, mitochondrial OS=Homo sapiens OX=9606 GN=ME2 PE=1 SV=1	11	5	16	5	1	584	65.4	7.61	49.46	5	0	3.19447e+06	4.05288e+06	1.96094e+06	6.04782e+06	5.35159e+06	3.77909e+06
B2R657	#N/A	Annexin OS=Homo sapiens OX=9606 PE=2 SV=1	19	8	21	8	1	488	52.6	5.52	49.4	8	0	1.5368e+07	2.20878e+07	8.43361e+06	14530390	1.47473e+07	1.64317e+07
O75947	ATP5PD	ATP synthase subunit d, mitochondrial OS=Homo sapiens OX=9606 GN=ATP5PD PE=1 SV=3	47	6	17	6	1	161	18.5	5.3	49.35	6	0	8.53513e+06	2.12459e+07	9.56905e+06	1.18531e+07	2.09408e+07	1.22627e+07
O60234	GMFG	Glia maturation factor gamma OS=Homo sapiens OX=9606 GN=GMFG PE=1 SV=1	54	5	16	3	1	142	16.8	5.26	49.24	5	2	1.5046e+07	1.02172e+07	1.61693e+07	1.92284e+07	1.57326e+07	1.06716e+07
Q12797	ASPH	Aspartyl/asparaginyl beta-hydroxylase OS=Homo sapiens OX=9606 GN=ASPH PE=1 SV=3	16	10	16	10	1	758	85.8	5.01	49.23	10	0	659740	1.27704e+07	2.16956e+06	3.4599e+06	5.50209e+06	2.86512e+06
A0A0K0K1K4	HEL-S-276	Proteasome subunit alpha type OS=Homo sapiens OX=9606 GN=HEL-S-276 PE=2 SV=1	44	8	19	8	1	248	27.9	8.46	49.11	8	0	4.37638e+06	1.40609e+07	3.88319e+06	3.99863e+06	9.48004e+06	4.45829e+06
P23946	CMA1	Chymase OS=Homo sapiens OX=9606 GN=CMA1 PE=1 SV=1	39	7	17	7	1	247	27.3	9.29	49.1	7	0	345185	8.76332e+06	NA	NA	7.77681e+07	5.64099e+06
E5RJD8	TBCA	Tubulin-specific chaperone A OS=Homo sapiens OX=9606 GN=TBCA PE=1 SV=1	49	5	12	5	1	119	14.3	5.12	49.09	5	0	3.15599e+06	1.10733e+07	4.59534e+06	3.15153e+06	1.12599e+07	2.33805e+06
A8K7N0	#N/A	cDNA FLJ75556, highly similar to Homo sapiens ribosomal protein L14, mRNA OS=Homo sapiens OX=9606 PE=2 SV=1	28	5	16	5	1	218	23.6	10.84	48.94	5	0	2.41873e+06	3.56822e+07	7.78871e+06	9.26391e+06	1.4892e+07	1.062e+07
P62263	RPS14	40S ribosomal protein S14 OS=Homo sapiens OX=9606 GN=RPS14 PE=1 SV=3	32	5	15	5	1	151	16.3	10.05	48.72	5	0	1.42272e+06	3.21535e+07	4.65429e+06	5.39087e+06	9.08087e+06	4.2484e+06
Q15286	RAB35	Ras-related protein Rab-35 OS=Homo sapiens OX=9606 GN=RAB35 PE=1 SV=1	24	4	18	2	1	201	23	8.29	48.16	4	0	1.31239e+06	1.45263e+06	216056	56020.9	161731	2.29856e+06
A0A024R5C4	RTN3	Reticulon OS=Homo sapiens OX=9606 GN=RTN3 PE=4 SV=1	12	3	16	3	1	236	25.6	8.51	48.14	3	0	2.33268e+07	3.31517e+06	1.03484e+07	1.28642e+07	6.97252e+06	1.33927e+07
A0A3B3ITK7	PGM1	Phosphoglucomutase-1 OS=Homo sapiens OX=9606 GN=PGM1 PE=4 SV=1	20	8	18	8	1	584	63.9	6.76	48.13	8	0	6.50902e+06	3.9329e+06	4.49218e+06	4.51167e+06	5.35907e+06	3.06642e+06
A8K4W2	#N/A	cDNA FLJ78635, highly similar to Homo sapiens ATP synthase, H+ transporting, mitochondrial F0 complex, subunit b, isoform 1 (ATP5F1), transcript variant 1, mRNA OS=Homo sapiens OX=9606 PE=2 SV=1	16	3	14	3	1	256	28.9	9.36	47.7	3	0	3.79287e+06	1.76242e+07	4.68324e+06	9.14409e+06	8.84487e+06	5.24633e+06
P27635	RPL10	60S ribosomal protein L10 OS=Homo sapiens OX=9606 GN=RPL10 PE=1 SV=4	24	5	17	5	1	214	24.6	10.08	47.61	5	0	2.98856e+06	3.01885e+07	3.05434e+06	5.13607e+06	4.7151e+06	4.14115e+06
P14854	COX6B1	Cytochrome c oxidase subunit 6B1 OS=Homo sapiens OX=9606 GN=COX6B1 PE=1 SV=2	58	4	16	4	1	86	10.2	7.05	47.56	4	0	5.25736e+06	1.23835e+07	3.55048e+06	6.49076e+06	1.14607e+07	8.4066e+06
B0YIW2	APOC3	Apolipoprotein C-III variant 1 OS=Homo sapiens OX=9606 GN=APOC3 PE=1 SV=1	29	3	13	3	1	117	12.8	8.18	47.54	3	0	4.64016e+07	4.98068e+07	8.92469e+07	9.48869e+07	1.52517e+07	4.55282e+07
P55786	NPEPPS	Puromycin-sensitive aminopeptidase OS=Homo sapiens OX=9606 GN=NPEPPS PE=1 SV=2	9	7	18	7	1	919	103.2	5.72	47.46	7	0	3.28371e+06	7.10696e+06	4.17836e+06	3.92812e+06	9.99878e+06	4.66818e+06
A0A024R713	DLD	Dihydrolipoyl dehydrogenase OS=Homo sapiens OX=9606 GN=DLD PE=2 SV=1	13	5	15	5	1	509	54.1	7.85	47.37	5	0	1.39117e+06	7.28642e+06	817843	4.34988e+06	7.09714e+06	3.64397e+06
A8K3H0	#N/A	cDNA FLJ75548, highly similar to Homo sapiens microfibrillar associated protein 5 (MFAP5), mRNA OS=Homo sapiens OX=9606 PE=2 SV=1	23	4	14	4	1	173	19.6	5.94	46.86	4	0	976626	4.12716e+06	1.61175e+06	956338	3.12029e+07	8.06709e+06
Q9BVK6	TMED9	Transmembrane emp24 domain-containing protein 9 OS=Homo sapiens OX=9606 GN=TMED9 PE=1 SV=2	18	4	14	3	1	235	27.3	8.02	46.8	4	1	9.05693e+06	2.83198e+07	1.12524e+07	1.70166e+07	1.0444e+07	1.45413e+07
P40306	PSMB10	Proteasome subunit beta type-10 OS=Homo sapiens OX=9606 GN=PSMB10 PE=1 SV=1	11	2	10	2	1	273	28.9	7.81	46.48	2	0	543963	2.26695e+06	459564	714150	910600	463059
A0A024R2Q4	RPL15	Ribosomal protein L15 OS=Homo sapiens OX=9606 GN=RPL15 PE=3 SV=1	29	5	18	5	1	204	24.1	11.62	46.41	5	0	1.62355e+07	4.03602e+07	2.08994e+07	1.97458e+07	2.93402e+07	2.09407e+07
A0A384MDW7	ECHS1	Enoyl Coenzyme A hydratase, short chain, 1, mitochondrial OS=Homo sapiens OX=9606 GN=ECHS1 PE=2 SV=1	29	5	13	5	1	290	31.4	8.07	46.38	5	0	NA	7.60312e+06	976927	2.94055e+06	9.53759e+06	3.20481e+06
P26022	PTX3	Pentraxin-related protein PTX3 OS=Homo sapiens OX=9606 GN=PTX3 PE=1 SV=3	14	4	14	4	1	381	41.9	5.01	46.35	4	0	6.29351e+06	641727	4.17813e+06	3.04348e+06	2.51938e+06	2.10046e+06
P07203	GPX1	Glutathione peroxidase 1 OS=Homo sapiens OX=9606 GN=GPX1 PE=1 SV=4	42	5	14	5	1	203	22.1	6.55	46.35	5	0	1.81987e+06	7.59045e+06	1.33843e+06	4.79144e+06	7.92437e+06	3.56555e+06
A2J1N6	#N/A	Rheumatoid factor RF-ET9 (Fragment) OS=Homo sapiens OX=9606 PE=2 SV=1	33	4	18	3	1	115	12.6	8.79	46.32	4	0	6.08049e+06	6.94963e+06	1.78547e+07	1.05484e+07	2.9993e+06	2.76264e+06
P17980	PSMC3	26S proteasome regulatory subunit 6A OS=Homo sapiens OX=9606 GN=PSMC3 PE=1 SV=3	20	5	13	5	1	439	49.2	5.24	46.3	5	0	360149	2.91761e+06	321259	1.19343e+06	2.90697e+06	2.07297e+06
B4DR61	SEC61A1	cDNA FLJ59739, highly similar to Protein transport protein Sec61 subunit alpha isoform 1 OS=Homo sapiens OX=9606 GN=SEC61A1 PE=1 SV=1	9	4	15	4	1	482	52.9	8.24	46.26	4	0	1.41487e+06	1.66087e+07	3.95955e+06	7.85161e+06	2.69831e+06	6.8649e+06
A0A024QZB4	hCG_1993905	Sulfotransferase OS=Homo sapiens OX=9606 GN=hCG_1993905 PE=3 SV=1	31	6	16	6	1	295	34.2	6.62	46.19	6	0	4.87711e+06	1.77309e+06	4.17203e+06	5.95006e+06	3.30027e+06	2.95882e+06
V9HVX6	HEL-9	Epididymis luminal protein 9 OS=Homo sapiens OX=9606 GN=HEL-9 PE=2 SV=1	20	8	16	7	1	501	54.8	6.92	46.14	8	0	1.92199e+06	5.18031e+06	533701	1.08469e+06	9.00949e+06	3.87482e+06
A0A2Z6ATB6	DBN1	Drebrin A OS=Homo sapiens OX=9606 GN=DBN1 PE=2 SV=1	10	4	12	4	1	695	76.3	4.51	45.91	4	0	542268	7.81038e+06	450571	1.65151e+06	4.84635e+06	NA
Q9NP72	RAB18	Ras-related protein Rab-18 OS=Homo sapiens OX=9606 GN=RAB18 PE=1 SV=1	27	4	14	4	1	206	23	5.24	45.56	4	0	4.27434e+06	3.7986e+06	2.26098e+06	4.88342e+06	2.61149e+06	2.7876e+06
P16152	CBR1	Carbonyl reductase [NADPH] 1 OS=Homo sapiens OX=9606 GN=CBR1 PE=1 SV=3	30	7	15	7	1	277	30.4	8.32	45.33	7	0	148913	9.47026e+06	906352	2.49966e+06	7.42402e+06	4.65495e+06
V9HW44	HEL-S-303	Epididymis secretory protein Li 303 OS=Homo sapiens OX=9606 GN=HEL-S-303 PE=2 SV=1	17	3	11	3	1	229	25.6	5.92	45.32	3	0	826641	6.19674e+06	1.43621e+06	1.4819e+06	6.8913e+06	2.58566e+06
A0A024R868	ANGPTL2	Angiopoietin-like 2, isoform CRA_a OS=Homo sapiens OX=9606 GN=ANGPTL2 PE=4 SV=1	25	9	14	9	1	493	57.1	7.53	44.98	9	0	404440	5.39402e+06	NA	883136	2.83949e+07	1.43899e+07
P25940	COL5A3	Collagen alpha-3(V) chain OS=Homo sapiens OX=9606 GN=COL5A3 PE=1 SV=3	3	3	13	3	1	1745	172	6.87	44.87	3	0	1.43886e+06	5.10917e+06	2.06742e+06	4.14552e+06	4.72227e+06	4.85787e+06
A0A217FLJ2	NCF4	Neutrophil cytosol factor 4 OS=Homo sapiens OX=9606 GN=NCF4 PE=1 SV=1	26	7	13	7	1	348	39	9.01	44.7	7	0	1.41406e+07	2.35945e+06	1.15091e+07	1.61858e+07	6.79817e+06	8.20245e+06
P50453	SERPINB9	Serpin B9 OS=Homo sapiens OX=9606 GN=SERPINB9 PE=1 SV=1	11	3	12	2	1	376	42.4	5.86	44.59	3	0	2.33763e+06	1.34096e+06	3.43533e+06	2.0562e+06	2.8012e+06	3.05193e+06
A8E631	KIAA1881	KIAA1881 protein (Fragment) OS=Homo sapiens OX=9606 GN=KIAA1881 PE=2 SV=1	25	12	12	2	1	642	64.7	6.21	44.5	12	0	NA	NA	NA	NA	936112	NA
Q02388	COL7A1	Collagen alpha-1(VII) chain OS=Homo sapiens OX=9606 GN=COL7A1 PE=1 SV=2	6	12	14	12	1	2944	295	6.27	44.49	12	0	NA	1.23126e+07	1.62711e+06	1.14017e+06	1.82137e+06	491147
O95498	VNN2	Vascular non-inflammatory molecule 2 OS=Homo sapiens OX=9606 GN=VNN2 PE=1 SV=3	16	5	15	5	1	520	58.5	6.52	44.49	5	0	2.14087e+07	8.87378e+06	1.43274e+07	1.78088e+07	1.64015e+07	9.59899e+06
O00231	PSMD11	26S proteasome non-ATPase regulatory subunit 11 OS=Homo sapiens OX=9606 GN=PSMD11 PE=1 SV=3	17	6	16	6	1	422	47.4	6.48	44.42	6	0	2.23262e+06	7.61462e+06	1.19068e+06	2.76139e+06	4.44674e+06	4.40097e+06
Q32Q10	RSU1	RSU1 protein (Fragment) OS=Homo sapiens OX=9606 GN=RSU1 PE=2 SV=1	19	4	16	4	1	280	31.3	9.09	43.93	4	0	1.18534e+06	6.55718e+06	1.61301e+06	2.62949e+06	8.92322e+06	4.50985e+06
P51911	CNN1	Calponin-1 OS=Homo sapiens OX=9606 GN=CNN1 PE=1 SV=2	23	6	11	6	1	297	33.2	9.07	43.93	6	0	NA	3.25763e+06	952202	181601	5.62072e+07	9.59936e+06
L7UUZ7	ITGB3	Integrin beta OS=Homo sapiens OX=9606 GN=ITGB3 PE=2 SV=1	15	8	14	8	1	788	86.9	5.2	43.9	8	0	322613	7.37788e+06	790428	4.58748e+06	78718.9	20444184
A0A024RB01	ITGA5	Integrin, alpha 5 (Fibronectin receptor, alpha polypeptide), isoform CRA_b OS=Homo sapiens OX=9606 GN=ITGA5 PE=3 SV=1	8	6	14	6	1	1098	119.2	6.06	43.86	6	0	1.86466e+06	8.36945e+06	1.38088e+06	4.72362e+06	7.68358e+06	6.16359e+06
E7DVW4	FABP4	Epididymis secretory protein Li 104 OS=Homo sapiens OX=9606 GN=FABP4 PE=2 SV=1	44	5	12	5	1	132	14.7	7.14	43.86	5	0	143633	1.16835e+07	499490	930563	1.63401e+08	1.05374e+07
P52943	CRIP2	Cysteine-rich protein 2 OS=Homo sapiens OX=9606 GN=CRIP2 PE=1 SV=1	50	5	11	5	1	208	22.5	8.72	43.84	5	0	526089	1.07171e+07	1.43628e+06	2.68649e+06	1.1395e+07	1.51847e+06
P14555	PLA2G2A	Phospholipase A2, membrane associated OS=Homo sapiens OX=9606 GN=PLA2G2A PE=1 SV=2	24	2	10	2	1	144	16.1	9.23	43.82	2	0	NA	2.0545e+06	NA	NA	2.91437e+07	2.06746e+07
A0A024R5H8	RAB6A	RAB6A, member RAS oncogene family, isoform CRA_b OS=Homo sapiens OX=9606 GN=RAB6A PE=4 SV=1	27	4	16	3	1	208	23.5	5.54	43.72	4	0	714959	1.85503e+06	1.41477e+06	2.8329e+06	648449	2.31249e+06
A0A140VK93	AK2	Adenylate kinase 2, mitochondrial OS=Homo sapiens OX=9606 GN=AK2 PE=2 SV=1	28	5	13	5	1	239	26.5	7.81	43.71	5	0	1.54155e+06	5.89697e+06	948464	2.25548e+06	8.38281e+06	813017
A0A384NPU2	HINT1	Epididymis secretory sperm binding protein OS=Homo sapiens OX=9606 GN=HINT1 PE=2 SV=1	40	4	16	4	1	126	13.8	6.95	43.7	4	0	6.94711e+06	1.37684e+07	7.45403e+06	8.7587e+06	1.8997e+07	9.9771e+06
A0A024RAM4	MAP1B	Microtubule-associated protein 1B, isoform CRA_b OS=Homo sapiens OX=9606 GN=MAP1B PE=4 SV=1	6	10	14	9	1	2468	270.5	4.81	43.47	10	1	1.00841e+06	6.71843e+06	NA	1.4512e+06	2.39131e+06	5.44016e+06
Q549M8	C14orf166	CLE7 OS=Homo sapiens OX=9606 GN=C14orf166 PE=2 SV=1	22	4	13	4	1	244	28.1	6.65	43.35	4	0	694741	4.55599e+06	192063	1.08835e+06	4.42808e+06	1.71284e+06
Q4LE36	ACLY	ACLY variant protein (Fragment) OS=Homo sapiens OX=9606 GN=ACLY variant protein PE=2 SV=1	11	9	15	9	1	1137	124.5	8.03	43.29	9	0	4.91423e+06	1.17029e+07	2.60895e+06	6.41609e+06	4.35775e+06	7.00058e+06
Q53HU7	#N/A	Eukaryotic translation initiation factor 3 subunit I (Fragment) OS=Homo sapiens OX=9606 PE=2 SV=1	18	4	13	4	1	325	36.5	5.64	43.16	4	0	3.97869e+06	9.65227e+06	4.42083e+06	5.35025e+06	6.39286e+06	6.20871e+06
A8K8U1	#N/A	cDNA FLJ77762, highly similar to Homo sapiens cullin-associated and neddylation-dissociated 1 (CAND1), mRNA OS=Homo sapiens OX=9606 PE=2 SV=1	11	11	19	11	1	1230	136.2	5.83	43.13	11	0	3.73431e+06	8.99601e+06	4.14653e+06	4.30005e+06	8.34489e+06	6.65878e+06
Q9P0L0	VAPA	Vesicle-associated membrane protein-associated protein A OS=Homo sapiens OX=9606 GN=VAPA PE=1 SV=3	24	4	13	4	1	249	27.9	8.62	42.94	4	0	1.01542e+06	4.05702e+06	954093	1.89195e+06	2.03289e+06	1.36691e+06
Q6FH49	NNMT	NNMT protein OS=Homo sapiens OX=9606 GN=NNMT PE=2 SV=1	22	4	14	4	1	264	29.6	5.74	42.74	4	0	4.12955e+06	9.81802e+06	6.54343e+06	4.50227e+06	2.06835e+07	6.53767e+06
B4DS05	#N/A	cDNA FLJ59403, highly similar to Nucleosome assembly protein 1-like 4 OS=Homo sapiens OX=9606 PE=2 SV=1	18	5	15	4	1	386	44.1	4.7	42.71	5	1	3.08121e+06	7.89593e+06	5.01066e+06	2.63885e+06	4.41142e+06	4.48201e+06
A0A024R3R5	LBR	Lamin B receptor, isoform CRA_a OS=Homo sapiens OX=9606 GN=LBR PE=4 SV=1	7	4	14	4	1	615	70.7	9.36	42.65	4	0	1.28988e+07	5.01529e+06	5.60092e+06	9.93379e+06	3.44654e+06	5.31356e+06
Q6FID4	SARA1	SARA1 protein OS=Homo sapiens OX=9606 GN=SARA1 PE=2 SV=1	22	4	16	4	1	198	22.3	7.03	42.35	4	0	4.57479e+06	2.07149e+07	6.71305e+06	1.0781e+07	8.82042e+06	1.22664e+07
Q53FE8	#N/A	cDNA FLJ36526 fis, clone TRACH2003347, highly similar to NSFL1 cofactor p47 (Fragment) OS=Homo sapiens OX=9606 PE=2 SV=1	25	6	12	6	1	370	40.5	5.14	42.31	6	0	1.98595e+06	6.75212e+06	3.22103e+06	2.06462e+06	7.84941e+06	3.08777e+06
B7Z9B1	#N/A	cDNA FLJ52398, highly similar to Cadherin-13 OS=Homo sapiens OX=9606 PE=2 SV=1	9	5	14	5	1	760	83.4	5.12	42.3	5	0	1.38195e+06	1.16935e+07	4.28405e+06	5.58663e+06	1.18519e+07	4.53864e+06
M0R0R2	RPS5	40S ribosomal protein S5 OS=Homo sapiens OX=9606 GN=RPS5 PE=1 SV=1	17	3	13	3	1	225	25.3	9.76	42.25	3	0	641306	1.72036e+07	1.33724e+06	3.18734e+06	4.04397e+06	2.72463e+06
O75339	CILP	Cartilage intermediate layer protein 1 OS=Homo sapiens OX=9606 GN=CILP PE=1 SV=4	7	7	14	7	1	1184	132.5	8.41	42.22	7	0	604470	1.65007e+06	343500	534740	4.70444e+07	3.98399e+07
A0A024R1X8	JUP	Junction plakoglobin, isoform CRA_a OS=Homo sapiens OX=9606 GN=JUP PE=4 SV=1	16	8	12	6	1	745	81.7	6.14	42.21	8	2	268574	2.81809e+06	460793	3.79764e+06	3.66213e+06	2.20539e+07
B3KQB4	#N/A	PRA1 family protein OS=Homo sapiens OX=9606 PE=2 SV=1	16	2	13	2	1	188	21.5	9.77	42.11	2	0	3.22681e+06	4.53971e+06	2.57219e+06	3.77874e+06	3.93002e+06	4.06292e+06
P25789	PSMA4	Proteasome subunit alpha type-4 OS=Homo sapiens OX=9606 GN=PSMA4 PE=1 SV=1	50	9	14	9	1	261	29.5	7.72	42.04	9	0	6.11642e+06	1.90723e+07	3.41522e+06	4.67771e+06	7.25156e+06	4.61492e+06
O60488	ACSL4	Long-chain-fatty-acid--CoA ligase 4 OS=Homo sapiens OX=9606 GN=ACSL4 PE=1 SV=2	16	7	13	6	1	711	79.1	8.38	42.04	7	1	1.00004e+07	6.09819e+06	2.71809e+06	1.03619e+07	3.05032e+07	1.54353e+07
O00602	FCN1	Ficolin-1 OS=Homo sapiens OX=9606 GN=FCN1 PE=1 SV=2	17	3	11	3	1	326	35.1	6.86	41.93	3	0	8.23917e+06	2.05388e+06	2.95247e+06	7.89165e+06	1.85705e+06	1.65405e+06
A0A087WW66	PSMD1	26S proteasome non-ATPase regulatory subunit 1 OS=Homo sapiens OX=9606 GN=PSMD1 PE=1 SV=1	7	5	14	5	1	953	105.8	5.41	41.68	5	0	1.92665e+06	7.83829e+06	2.50265e+06	2.05082e+06	6.89733e+06	3.89192e+06
O14980	XPO1	Exportin-1 OS=Homo sapiens OX=9606 GN=XPO1 PE=1 SV=1	11	9	16	9	1	1071	123.3	6.06	41.66	9	0	565965	4.83225e+06	348695	724499	710732	842339
P20618	PSMB1	Proteasome subunit beta type-1 OS=Homo sapiens OX=9606 GN=PSMB1 PE=1 SV=2	29	5	14	5	1	241	26.5	8.13	41.6	5	0	6.72834e+06	1.2162e+07	5.06848e+06	6.68679e+06	1.45866e+07	8.0571e+06
A2RU94	RAB27A	RAB27A, member RAS oncogene family OS=Homo sapiens OX=9606 GN=RAB27A PE=2 SV=1	21	4	15	4	1	221	24.9	5.22	41.53	4	0	1.33436e+07	792635	6.40671e+06	1.55358e+07	5.74388e+06	1.05875e+07
Q9UBS4	DNAJB11	DnaJ homolog subfamily B member 11 OS=Homo sapiens OX=9606 GN=DNAJB11 PE=1 SV=1	9	3	12	3	1	358	40.5	6.18	41.5	3	0	1.10005e+06	3.18534e+06	612046	4.04791e+06	5.26406e+06	4.62283e+06
A0A024R6W0	GOT2	Aspartate aminotransferase OS=Homo sapiens OX=9606 GN=GOT2 PE=4 SV=1	20	7	12	7	1	430	47.4	9.01	41.48	7	0	3.4289e+06	1.42065e+07	5.94905e+06	6.28121e+06	1.14203e+07	6.1744e+06
P18428	LBP	Lipopolysaccharide-binding protein OS=Homo sapiens OX=9606 GN=LBP PE=1 SV=3	11	4	14	4	1	481	53.4	6.7	41.31	4	0	2.0556e+06	1.44958e+06	2.2283e+06	3.03093e+06	3.58805e+06	1.55537e+06
A0A140VJF4	#N/A	Biliverdin reductase A OS=Homo sapiens OX=9606 PE=2 SV=1	23	5	12	5	1	296	33.4	6.44	41.29	5	0	2.48563e+06	3.55207e+06	3.66991e+06	4.86798e+06	3.20884e+06	2.3369e+06
A0A0A0MRZ8	IGKV3D-11	Immunoglobulin kappa variable 3D-11 OS=Homo sapiens OX=9606 GN=IGKV3D-11 PE=3 SV=6	26	2	12	2	1	115	12.6	5.29	41.28	2	0	3.07728e+07	4.48384e+07	1.04552e+08	75943236	3.2483e+07	2.76616e+07
Q14554	PDIA5	Protein disulfide-isomerase A5 OS=Homo sapiens OX=9606 GN=PDIA5 PE=1 SV=1	18	6	12	6	1	519	59.6	7.91	41.28	6	0	257476	8.44219e+06	410461	695229	NA	NA
A0A0X9T0H6	#N/A	GCT-A5 heavy chain variable region (Fragment) OS=Homo sapiens OX=9606 PE=2 SV=1	21	3	13	2	1	114	12.7	7.96	41.21	3	0	2.3796e+06	2.93359e+06	1.29351e+07	6.5618e+06	1.13623e+06	1.53235e+06
Q8NFH9	#N/A	MLL/SEPTIN6 fusion protein (Fragment) OS=Homo sapiens OX=9606 PE=2 SV=1	12	6	16	2	1	559	63.1	8.02	40.82	6	0	1.69093e+06	1.1956e+06	1.26709e+06	1.36076e+06	1.85677e+06	1.78125e+06
D3YTG3	ABI3BP	Target of Nesh-SH3 OS=Homo sapiens OX=9606 GN=ABI3BP PE=1 SV=1	3	5	10	5	1	1777	195.2	9.73	40.71	5	0	NA	2.30747e+06	NA	315457	3.66637e+07	1.20829e+07
B2R6S5	#N/A	UMP-CMP kinase OS=Homo sapiens OX=9606 GN=CMPK PE=2 SV=1	19	4	14	4	1	228	25.8	7.97	40.63	4	0	994038	3.38857e+06	928837	2.06571e+06	4.59939e+06	1.87831e+06
P25788	PSMA3	Proteasome subunit alpha type-3 OS=Homo sapiens OX=9606 GN=PSMA3 PE=1 SV=2	23	5	15	5	1	255	28.4	5.33	40.62	5	0	2.32322e+07	1.25061e+07	8.9073e+06	8.28789e+06	1.40267e+07	1.07581e+07
J9R021	eIF3a	Eukaryotic translation initiation factor 3 subunit A OS=Homo sapiens OX=9606 GN=eIF3a PE=2 SV=1	7	9	15	9	1	1382	166.4	6.79	40.43	9	0	3.02174e+06	1.12966e+07	2.8639e+06	4.24291e+06	6.0066e+06	3.79422e+06
A0A024RAR8	ARTS-1	Aminopeptidase OS=Homo sapiens OX=9606 GN=ARTS-1 PE=3 SV=1	7	5	14	5	1	941	107.1	6.34	40.37	5	0	830750	5.37866e+06	1.98861e+06	2.92384e+06	2.47774e+06	2.60952e+06
A8K287	SNAP23	Synaptosomal-associated protein OS=Homo sapiens OX=9606 GN=SNAP23 PE=2 SV=1	19	3	16	3	1	211	23.3	5.01	40.09	3	0	5.2622e+06	3.13521e+06	4.53679e+06	5.75643e+06	5.72011e+06	6.90834e+06
Q01955	COL4A3	Collagen alpha-3(IV) chain OS=Homo sapiens OX=9606 GN=COL4A3 PE=1 SV=3	2	2	17	2	1	1670	161.7	9.16	39.93	2	0	NA	NA	NA	NA	NA	NA
V9HWB7	HEL60	Epididymis luminal protein 60 OS=Homo sapiens OX=9606 GN=HEL60 PE=2 SV=1	17	11	15	11	1	889	98.3	6.68	39.85	11	0	207834	5.19613e+06	1.71246e+06	956012	1.20646e+07	936504
Q53EY4	#N/A	RAB31, member RAS oncogene family variant (Fragment) OS=Homo sapiens OX=9606 PE=2 SV=1	33	5	12	5	1	195	21.7	7.06	39.73	5	0	3.66281e+06	3.6598e+06	3.35512e+06	8.88832e+06	9.18988e+06	5.06837e+06
A0A024R7I2	CYP4F3	Cytochrome P450, family 4, subfamily F, polypeptide 3, isoform CRA_b OS=Homo sapiens OX=9606 GN=CYP4F3 PE=3 SV=1	14	6	13	6	1	520	59.7	8.18	39.66	6	0	1.58962e+07	265835	4.40416e+06	7.6751e+06	3.31238e+06	8.50664e+06
J3QQ67	RPL18	60S ribosomal protein L18 (Fragment) OS=Homo sapiens OX=9606 GN=RPL18 PE=1 SV=1	22	4	13	4	1	190	21.8	11.72	39.65	4	0	4.09575e+06	3.06436e+07	5.18618e+06	1.23652e+07	1.30383e+07	9.04689e+06
O95336	PGLS	6-phosphogluconolactonase OS=Homo sapiens OX=9606 GN=PGLS PE=1 SV=2	25	5	16	5	1	258	27.5	6.05	39.62	5	0	7.00805e+06	7.14423e+06	3.09311e+06	5.45073e+06	1.44366e+07	5.80264e+06
Q9UMS4	PRPF19	Pre-mRNA-processing factor 19 OS=Homo sapiens OX=9606 GN=PRPF19 PE=1 SV=1	24	7	13	7	1	504	55.1	6.61	39.61	7	0	579697	1.2346e+07	953840	4.16256e+06	3.51692e+06	1.10883e+06
J3KPA1	CRISP3	Cysteine-rich secretory protein 3 OS=Homo sapiens OX=9606 GN=CRISP3 PE=1 SV=1	27	5	15	5	1	276	31	7.61	39.6	5	0	1.64417e+07	NA	9.72376e+06	5.67875e+06	6.9327e+06	6.40102e+06
P43034	PAFAH1B1	Platelet-activating factor acetylhydrolase IB subunit alpha OS=Homo sapiens OX=9606 GN=PAFAH1B1 PE=1 SV=2	20	6	14	5	1	410	46.6	7.37	39.59	6	0	1.11228e+06	3.01288e+06	1.02747e+06	2.75328e+06	5.90041e+06	2.04154e+06
P53634	CTSC	Dipeptidyl peptidase 1 OS=Homo sapiens OX=9606 GN=CTSC PE=1 SV=2	16	6	15	6	1	463	51.8	6.99	39.54	6	0	5.91163e+06	8.49045e+06	3.71462e+06	4.91705e+06	8.25603e+06	3.24648e+06
Q01432	AMPD3	AMP deaminase 3 OS=Homo sapiens OX=9606 GN=AMPD3 PE=1 SV=1	7	5	15	5	1	767	88.8	6.98	39.52	5	0	5.11355e+06	1.58841e+06	4.07991e+06	3.6986e+06	3.86573e+06	4.46956e+06
P02511	CRYAB	Alpha-crystallin B chain OS=Homo sapiens OX=9606 GN=CRYAB PE=1 SV=2	39	8	13	8	1	175	20.1	7.33	39.5	8	0	NA	2.77944e+06	NA	NA	7.95668e+07	1.08659e+07
J3KQ18	DDT	D-dopachrome decarboxylase OS=Homo sapiens OX=9606 GN=DDT PE=1 SV=1	17	2	11	2	1	132	14.2	7.3	39.45	2	0	3.04237e+06	4.41026e+06	1.96322e+06	2.74199e+06	4.68573e+06	4.67926e+06
A8K9B9	#N/A	cDNA FLJ77391, highly similar to Homo sapiens EH-domain containing 4 (EHD4), mRNA OS=Homo sapiens OX=9606 PE=2 SV=1	16	7	15	6	1	541	61.1	6.65	39.1	7	0	993890	7.75718e+06	2.05997e+06	5266223	5.71954e+06	2.96417e+06
B8ZWD9	DBI	Diazepam binding inhibitor, splice form 1D(2) OS=Homo sapiens OX=9606 GN=DBI PE=2 SV=1	33	4	10	4	1	144	16.1	5.05	39.03	4	0	3.15702e+06	2.32534e+06	1.54274e+06	633085	1.19172e+07	3.01565e+06
O75165	DNAJC13	DnaJ homolog subfamily C member 13 OS=Homo sapiens OX=9606 GN=DNAJC13 PE=1 SV=5	4	6	13	6	1	2243	254.3	6.74	38.98	6	0	1.10509e+06	1.1222e+06	447282	1.68379e+06	520527	1.16742e+06
E9PB61	ALYREF	THO complex subunit 4 OS=Homo sapiens OX=9606 GN=ALYREF PE=1 SV=1	14	2	13	2	1	264	27.5	11.05	38.87	2	0	6.06907e+06	1.18854e+07	5.2052e+06	7193620	1.01767e+07	7.94525e+06
Q5JTV8	TOR1AIP1	Torsin-1A-interacting protein 1 OS=Homo sapiens OX=9606 GN=TOR1AIP1 PE=1 SV=2	16	6	12	6	1	583	66.2	8.18	38.38	6	0	3.07804e+06	6.07023e+06	1.40546e+06	2.77687e+06	2.10421e+06	1.2513e+06
A0A024R969	CHI3L1	Chitinase 3-like 1 (Cartilage glycoprotein-39), isoform CRA_a OS=Homo sapiens OX=9606 GN=CHI3L1 PE=3 SV=1	28	7	12	7	1	383	42.6	8.46	38.3	7	0	1.56007e+07	2.46911e+06	2.9815e+06	2.11653e+06	1.42823e+07	5.44964e+06
A0A384NL93	#N/A	Epididymis secretory sperm binding protein OS=Homo sapiens OX=9606 PE=2 SV=1	16	3	14	3	1	129	13.7	8.81	38.29	3	0	8.83147e+06	3.12133e+07	1.30817e+07	1.93024e+07	6.87857e+06	9.78852e+06
A0A0S2Z569	DAZAP1	DAZ associated protein 1 isoform 1 (Fragment) OS=Homo sapiens OX=9606 GN=DAZAP1 PE=2 SV=1	10	3	15	3	1	407	43.4	8.56	38.25	3	0	2.90094e+06	4.81406e+06	1.90003e+06	3.83007e+06	4.6744e+06	1.91947e+06
P08473	MME	Neprilysin OS=Homo sapiens OX=9606 GN=MME PE=1 SV=2	13	6	12	6	1	750	85.5	5.73	38.16	6	0	1.92229e+06	2.23045e+06	1.16208e+06	1.93583e+06	3.72276e+06	3.78619e+06
Q5NKV8	ICAM1	Intercellular adhesion molecule 1 OS=Homo sapiens OX=9606 GN=ICAM1 PE=2 SV=1	19	8	13	8	1	532	57.8	7.68	38.09	8	0	1.15382e+06	4.59218e+06	6.13782e+06	7.87056e+06	9.17417e+06	4.09956e+06
O43143	DHX15	Pre-mRNA-splicing factor ATP-dependent RNA helicase DHX15 OS=Homo sapiens OX=9606 GN=DHX15 PE=1 SV=2	6	4	15	4	1	795	90.9	7.46	38.08	4	0	840929	2.99595e+06	885578	1.55808e+06	2.5352e+06	3.94408e+06
A0A024R663	KTN1	Kinectin 1 (Kinesin receptor), isoform CRA_a OS=Homo sapiens OX=9606 GN=KTN1 PE=4 SV=1	9	9	11	9	1	1357	156.2	5.64	38.07	9	0	393728	1.02477e+07	2.56414e+06	3.35045e+06	1.00041e+07	2.99275e+06
Q59ET0	#N/A	Glucan, branching enzyme 1 variant (Fragment) OS=Homo sapiens OX=9606 PE=2 SV=1	11	6	12	6	1	754	86.1	6.93	38.06	6	0	6.12781e+06	3.42643e+06	4.02963e+06	3.25599e+06	9.0099e+06	3.56776e+06
B4DNB9	#N/A	cDNA FLJ53069, highly similar to AP-2 complex subunit mu-1 OS=Homo sapiens OX=9606 PE=2 SV=1	21	7	13	7	1	460	52.3	9.5	38.05	7	0	1.69839e+06	1.09892e+07	3.24222e+06	5.5578e+06	5.49987e+06	1.07622e+06
P51571	SSR4	Translocon-associated protein subunit delta OS=Homo sapiens OX=9606 GN=SSR4 PE=1 SV=1	31	5	13	5	1	173	19	6.15	38.04	5	0	4.03619e+06	1.80837e+07	7.06216e+06	9.23382e+06	4.91822e+06	8.86342e+06
H0YI09	METTL7A	Methyltransferase-like protein 7A (Fragment) OS=Homo sapiens OX=9606 GN=METTL7A PE=1 SV=1	17	3	11	3	1	244	28.3	8.38	38.01	3	0	837110	6.0396e+06	830564	4.07264e+06	1.41753e+07	3.17765e+06
Q5HYD8	DKFZp686M0919	Uncharacterized protein DKFZp686M0919 OS=Homo sapiens OX=9606 GN=DKFZp686M0919 PE=2 SV=1	24	9	12	9	1	533	60.6	5.71	37.9	9	0	1.05454e+06	9.33553e+06	2.32767e+06	1.45235e+06	739984	861559
O75533	SF3B1	Splicing factor 3B subunit 1 OS=Homo sapiens OX=9606 GN=SF3B1 PE=1 SV=3	12	9	13	9	1	1304	145.7	7.09	37.86	9	0	1.14554e+06	8.69432e+06	1.33932e+06	4.10098e+06	1.04211e+06	3.1832e+06
Q92599	43716	Septin-8 OS=Homo sapiens OX=9606 GN=SEPT8 PE=1 SV=4	19	8	13	4	1	483	55.7	6.28	37.65	8	0	802665	2.72728e+06	592515	967440	1.66591e+06	792285
B2RC45	#N/A	cDNA, FLJ95846, highly similar to Homo sapiens serpin peptidase inhibitor, clade B (ovalbumin), member 10 (SERPINB10), mRNA OS=Homo sapiens OX=9606 PE=2 SV=1	22	8	15	8	1	397	45.3	6.01	37.61	8	0	1.07552e+07	NA	4.20884e+06	2.76213e+06	1.06819e+07	6.67427e+06
Q0ZCF6	#N/A	Immunglobulin heavy chain variable region (Fragment) OS=Homo sapiens OX=9606 PE=4 SV=1	23	3	13	2	1	129	14.5	8.78	37.48	3	0	7.61469e+06	8.7601e+06	1.94751e+07	12711038	NA	5.06278e+06
A8K646	#N/A	cDNA FLJ75699, highly similar to Homo sapiens osteoclast stimulating factor 1 (OSTF1), mRNA OS=Homo sapiens OX=9606 PE=2 SV=1	23	4	11	4	1	214	23.7	5.68	37.47	4	0	6.78297e+06	4.76755e+06	5.20798e+06	7.61092e+06	9.05627e+06	1.67e+06
B3KML1	#N/A	cDNA FLJ11308 fis, clone PLACE1010074, highly similar to Sorting nexin-2 OS=Homo sapiens OX=9606 PE=2 SV=1	15	7	13	6	1	519	58.4	5.06	37.44	7	1	3.99656e+06	8.32867e+06	5.23141e+06	4.25612e+06	8.68772e+06	5.4617e+06
Q15437	SEC23B	Protein transport protein Sec23B OS=Homo sapiens OX=9606 GN=SEC23B PE=1 SV=2	6	4	15	2	1	767	86.4	6.89	37.36	4	0	20114	171870	56186.1	123088	163701	41210.6
B2R7P8	#N/A	cDNA, FLJ93545, highly similar to Homo sapiens 5-aminoimidazole-4-carboxamide ribonucleotide formyltransferase/IMP cyclohydrolase (ATIC), mRNA OS=Homo sapiens OX=9606 PE=2 SV=1	20	8	13	8	1	592	64.6	6.8	37.31	8	0	575587	5.48889e+06	525538	1.89723e+06	2.93863e+06	1.14026e+06
A8K6V3	#N/A	cDNA FLJ78677, highly similar to Homo sapiens splicing factor 3b, subunit 3, 130kDa (SF3B3), mRNA OS=Homo sapiens OX=9606 PE=2 SV=1	9	7	12	7	1	1217	135.5	5.21	37.31	7	0	1.6745e+06	1.0891e+07	1.0929e+06	2.99628e+06	6.83111e+06	2.68811e+06
Q7RU04	RNPEP	Aminopeptidase B OS=Homo sapiens OX=9606 GN=RNPEP PE=4 SV=1	11	5	13	5	1	658	73.5	6.11	37.25	5	0	7.37847e+06	2.02138e+06	4.23429e+06	3.30871e+06	9.77064e+06	2.72302e+06
A4D177	CBX3	Chromobox homolog 3 (HP1 gamma homolog, Drosophila) OS=Homo sapiens OX=9606 GN=CBX3 PE=4 SV=1	23	4	10	3	1	183	20.8	5.33	37.13	4	1	4.5678e+06	1.37516e+07	2.9112e+06	6196707	8.6347e+06	2.52119e+06
A8K2M0	PSMC4	Proteasome (Prosome, macropain) 26S subunit, ATPase, 4, isoform CRA_b OS=Homo sapiens OX=9606 GN=PSMC4 PE=2 SV=1	23	7	12	7	1	418	47.3	5.21	36.95	7	0	838162	6.85479e+06	1.46549e+06	3.38694e+06	5.1539e+06	2.31463e+06
P50502	ST13	Hsc70-interacting protein OS=Homo sapiens OX=9606 GN=ST13 PE=1 SV=2	11	4	12	4	1	369	41.3	5.27	36.84	4	0	4.63397e+06	9.98698e+06	2.18175e+06	2344181	3.98639e+06	2.76287e+06
P53992	SEC24C	Protein transport protein Sec24C OS=Homo sapiens OX=9606 GN=SEC24C PE=1 SV=3	9	7	12	7	1	1094	118.2	7.06	36.77	7	0	850602	3.69781e+06	1.08158e+06	2.86759e+06	2.5769e+06	2.02209e+06
H3BNX8	COX5A	Cytochrome c oxidase subunit 5A, mitochondrial OS=Homo sapiens OX=9606 GN=COX5A PE=1 SV=1	32	5	11	5	1	153	17.2	6	36.68	5	0	4.42465e+06	2.55896e+07	1.21483e+06	1.02922e+07	9.55644e+06	1.74815e+06
A0A140GPP7	#N/A	Prolyl endopeptidase FAP OS=Homo sapiens OX=9606 PE=3 SV=1	6	4	11	4	1	760	87.7	6.55	36.65	4	0	756117	7.47694e+06	2.91557e+06	5.32693e+06	7.83235e+06	2.74662e+06
O43451	MGAM	Maltase-glucoamylase, intestinal OS=Homo sapiens OX=9606 GN=MGAM PE=1 SV=5	5	7	13	7	1	1857	209.7	5.5	36.51	7	0	2.42676e+07	267980	1.75507e+06	9.7994e+06	1.28887e+07	8.68721e+06
Q5HYL6	DKFZp686E1899	Uncharacterized protein DKFZp686E1899 OS=Homo sapiens OX=9606 GN=DKFZp686E1899 PE=2 SV=1	34	8	13	8	1	352	39.5	5.19	36.42	8	0	2.56708e+06	9.0319e+06	2.14471e+06	5.14262e+06	8.03675e+06	2.75861e+06
X5CMJ9	PSM8	Proteasome subunit beta OS=Homo sapiens OX=9606 GN=PSM8 PE=3 SV=1	17	4	11	4	1	276	30.3	7.43	36.23	4	0	2.01768e+06	7.58645e+06	2.47304e+06	3.11256e+06	4.61613e+06	2.14044e+06
P38919	EIF4A3	Eukaryotic initiation factor 4A-III OS=Homo sapiens OX=9606 GN=EIF4A3 PE=1 SV=4	17	6	12	5	1	411	46.8	6.73	36.22	6	0	3.03356e+06	1.17872e+07	2.19037e+06	5.94543e+06	6.3726e+06	3.62192e+06
E9PAV3	NACA	Nascent polypeptide-associated complex subunit alpha, muscle-specific form OS=Homo sapiens OX=9606 GN=NACA PE=1 SV=1	2	3	10	3	1	2078	205.3	9.58	36.11	3	0	2.21738e+06	1.87605e+07	3.67197e+06	5.55416e+06	7.68177e+06	5.11767e+06
O43242	PSMD3	26S proteasome non-ATPase regulatory subunit 3 OS=Homo sapiens OX=9606 GN=PSMD3 PE=1 SV=2	18	7	12	7	1	534	60.9	8.44	36.06	7	0	890558	8.88481e+06	1.16015e+06	2.53185e+06	3.00918e+06	3.4428e+06
P36542	ATP5F1C	ATP synthase subunit gamma, mitochondrial OS=Homo sapiens OX=9606 GN=ATP5F1C PE=1 SV=1	24	7	13	7	1	298	33	9.22	36	7	0	2.01046e+06	1.62498e+07	2.58007e+06	9.07293e+06	9.03004e+06	1.10613e+07
Q12905	ILF2	Interleukin enhancer-binding factor 2 OS=Homo sapiens OX=9606 GN=ILF2 PE=1 SV=2	28	8	12	8	1	390	43	5.26	35.9	8	0	2.05869e+06	1.6552e+07	2.87542e+06	4.57977e+06	4.59825e+06	3.94647e+06
J3KPD6	HCK	Tyrosine-protein kinase OS=Homo sapiens OX=9606 GN=HCK PE=1 SV=1	10	5	15	2	1	526	59.5	6.7	35.88	5	0	179503	53783	NA	NA	1.73299e+06	157112
A0A024RBB7	NAP1L1	Nucleosome assembly protein 1-like 1, isoform CRA_a OS=Homo sapiens OX=9606 GN=NAP1L1 PE=3 SV=1	12	3	11	2	1	391	45.3	4.46	35.84	3	0	1.73972e+06	7.28854e+06	829108	1.24789e+06	3.39176e+06	2.27708e+06
P48426	PIP4K2A	Phosphatidylinositol 5-phosphate 4-kinase type-2 alpha OS=Homo sapiens OX=9606 GN=PIP4K2A PE=1 SV=2	6	2	12	2	1	406	46.2	6.99	35.81	2	0	1.03214e+06	1.38538e+06	1.06473e+06	1.22672e+06	1.81205e+06	2.57319e+06
P13727	PRG2	Bone marrow proteoglycan OS=Homo sapiens OX=9606 GN=PRG2 PE=1 SV=2	27	4	10	4	1	222	25.2	6.76	35.81	4	0	283506	2.72719e+07	407484	1.80352e+06	424266	1.08015e+06
A0A075B6K5	IGLV3-9	Immunoglobulin lambda variable 3-9 OS=Homo sapiens OX=9606 GN=IGLV3-9 PE=3 SV=1	23	2	9	2	1	115	12.3	7.39	35.75	2	0	1.49102e+07	3.8818e+07	4.27786e+07	4.67527e+07	1.18945e+07	5.33665e+07
P42677	RPS27	40S ribosomal protein S27 OS=Homo sapiens OX=9606 GN=RPS27 PE=1 SV=3	40	4	15	4	1	84	9.5	9.45	35.72	4	0	1.1743e+07	4.44908e+07	1.55941e+07	2.066e+07	2.1072e+07	9.16881e+06
O75396	SEC22B	Vesicle-trafficking protein SEC22b OS=Homo sapiens OX=9606 GN=SEC22B PE=1 SV=4	26	4	11	4	1	215	24.6	6.92	35.71	4	0	2.93252e+06	1.21257e+07	2.43647e+06	7.92921e+06	4.90134e+06	3.86952e+06
P62318	SNRPD3	Small nuclear ribonucleoprotein Sm D3 OS=Homo sapiens OX=9606 GN=SNRPD3 PE=1 SV=1	32	3	9	3	1	126	13.9	10.32	35.69	3	0	797463	1.75243e+07	3.1021e+06	5.2301e+06	5.17355e+06	795203
P55036	PSMD4	26S proteasome non-ATPase regulatory subunit 4 OS=Homo sapiens OX=9606 GN=PSMD4 PE=1 SV=1	16	4	11	4	1	377	40.7	4.79	35.67	4	0	4.31521e+06	1.03501e+07	1.81201e+06	4.11295e+06	4.00792e+06	1.15886e+07
A8K669	#N/A	cDNA FLJ78452, highly similar to Homo sapiens legumain (LGMN), transcript variant 2, mRNA OS=Homo sapiens OX=9606 PE=2 SV=1	10	3	10	3	1	433	49.4	6.55	35.65	3	0	107543	7.05292e+06	3.31326e+06	1.09582e+06	3.21371e+06	1.28829e+06
Q92973	TNPO1	Transportin-1 OS=Homo sapiens OX=9606 GN=TNPO1 PE=1 SV=2	9	6	13	6	1	898	102.3	4.98	35.56	6	0	3.22823e+06	4.9499e+06	1.45435e+06	3.32241e+06	4.33016e+06	2.5048e+06
P07741	APRT	Adenine phosphoribosyltransferase OS=Homo sapiens OX=9606 GN=APRT PE=1 SV=2	33	4	12	4	1	180	19.6	6.02	35.48	4	0	676737	6.10636e+06	2.75187e+06	2.03396e+06	2.23918e+06	1.01242e+06
P62269	RPS18	40S ribosomal protein S18 OS=Homo sapiens OX=9606 GN=RPS18 PE=1 SV=3	31	6	16	4	1	152	17.7	10.99	35.44	6	2	9.46903e+06	4.95119e+07	1.28028e+07	1.28278e+07	1.07835e+07	1.08013e+07
P62913	RPL11	60S ribosomal protein L11 OS=Homo sapiens OX=9606 GN=RPL11 PE=1 SV=2	21	3	12	3	1	178	20.2	9.6	35.38	3	0	3.65383e+06	2.95182e+07	5.53784e+06	7.48572e+06	8.93685e+06	6.66072e+06
Q9H9B4	SFXN1	Sideroflexin-1 OS=Homo sapiens OX=9606 GN=SFXN1 PE=1 SV=4	20	5	14	3	1	322	35.6	9.07	35.36	5	0	1.08387e+06	3.87276e+06	1.75625e+06	2.81801e+06	3.25445e+06	2.65926e+06
Q8WU39	MZB1	Marginal zone B- and B1-cell-specific protein OS=Homo sapiens OX=9606 GN=MZB1 PE=1 SV=1	39	5	10	5	1	189	20.7	5.57	35.33	5	0	NA	2.20601e+06	6.11353e+06	10725400	579913	NA
P10153	RNASE2	Non-secretory ribonuclease OS=Homo sapiens OX=9606 GN=RNASE2 PE=1 SV=2	20	3	12	3	1	161	18.3	8.73	35.31	3	0	1.67723e+07	9.64554e+06	1.96347e+06	1.82759e+06	806922	571710
B0QY89	EIF3L	Eukaryotic translation initiation factor 3 subunit L OS=Homo sapiens OX=9606 GN=EIF3L PE=1 SV=1	14	6	11	6	1	607	70.9	6.65	35.28	6	0	369140	3.76715e+06	1.21095e+06	1.66042e+06	9.14653e+06	6.2049e+06
P00742	F10	Coagulation factor X OS=Homo sapiens OX=9606 GN=F10 PE=1 SV=2	9	3	10	3	1	488	54.7	5.94	35.28	3	0	1.16083e+06	1.1022e+06	1.91496e+06	1.89145e+06	NA	1.98699e+06
B4DS79	#N/A	cDNA FLJ56828, highly similar to Adapter-relatedprotein complex 1 beta-1 subunit OS=Homo sapiens OX=9606 PE=2 SV=1	14	6	12	5	1	499	53.8	4.69	35.25	6	0	5.3842e+06	7.3104e+06	6.45239e+06	5.97934e+06	7.88052e+06	4.7825e+06
P62277	RPS13	40S ribosomal protein S13 OS=Homo sapiens OX=9606 GN=RPS13 PE=1 SV=2	27	5	10	5	1	151	17.2	10.54	35.23	5	0	1.07963e+06	2.50778e+07	221091	3.58797e+06	4.36231e+06	2.85614e+06
A0A2R8Y5A3	CTNNB1	Catenin beta-1 OS=Homo sapiens OX=9606 GN=CTNNB1 PE=1 SV=1	11	7	12	5	1	783	85.6	5.97	35.13	7	0	311239	5.86923e+06	1.51302e+06	1.40187e+06	1.31227e+06	4.37387e+06
P07919	UQCRH	Cytochrome b-c1 complex subunit 6, mitochondrial OS=Homo sapiens OX=9606 GN=UQCRH PE=1 SV=2	30	2	8	2	1	91	10.7	4.44	35.08	2	0	1.5059e+06	2.79405e+06	628356	1.29626e+06	4.47133e+06	2.64053e+06
Q9Y2J2	EPB41L3	Band 4.1-like protein 3 OS=Homo sapiens OX=9606 GN=EPB41L3 PE=1 SV=2	2	2	11	2	1	1087	120.6	5.19	35.07	2	0	546971	2.93227e+06	2.05766e+06	1.5741e+06	6.39943e+06	1.2323e+06
P30040	ERP29	Endoplasmic reticulum resident protein 29 OS=Homo sapiens OX=9606 GN=ERP29 PE=1 SV=4	24	5	13	5	1	261	29	7.31	35.04	5	0	4.72779e+06	1.3792e+07	1.81266e+06	5.55284e+06	6.70871e+06	5.18798e+06
Q1KMD3	HNRNPUL2	Heterogeneous nuclear ribonucleoprotein U-like protein 2 OS=Homo sapiens OX=9606 GN=HNRNPUL2 PE=1 SV=1	13	6	12	6	1	747	85.1	4.91	35.02	6	0	7.8272e+06	7.60433e+06	4.53856e+06	7.3307e+06	6.54923e+06	3.09666e+07
Q7L5N7	LPCAT2	Lysophosphatidylcholine acyltransferase 2 OS=Homo sapiens OX=9606 GN=LPCAT2 PE=1 SV=1	8	3	12	3	1	544	60.2	6.55	34.95	3	0	4.90254e+06	290354	451288	2.94908e+06	2.76858e+06	2.59031e+06
E1NZA1	PRIC295	Peroxisome proliferator activated receptor interacting complex protein OS=Homo sapiens OX=9606 GN=PRIC295 PE=2 SV=1	2	4	13	4	1	2671	292.6	7.43	34.93	4	0	142336	2.87653e+06	302353	1.47137e+06	1.30891e+06	544591
O95466	FMNL1	Formin-like protein 1 OS=Homo sapiens OX=9606 GN=FMNL1 PE=1 SV=3	7	6	12	4	1	1100	121.8	5.72	34.89	6	2	4.77594e+06	158690	1.68835e+06	3.97441e+06	874711	825907
A0A3B3IUA2	SNU13	NHP2-like protein 1 OS=Homo sapiens OX=9606 GN=SNU13 PE=4 SV=1	9	3	11	3	1	272	30.1	9.55	34.76	3	0	2.37526e+06	1.38942e+07	4.21778e+06	6.74206e+06	9.72098e+06	4.45713e+06
A0A0A6YYL4	CORO7-PAM16	Coronin OS=Homo sapiens OX=9606 GN=CORO7-PAM16 PE=3 SV=1	10	6	12	6	1	1048	114.1	6.33	34.72	6	0	5.52812e+06	1.62216e+06	3.17832e+06	6.29522e+06	4.61037e+06	2.63842e+06
E9PCR7	OGDH	2-oxoglutarate dehydrogenase, mitochondrial OS=Homo sapiens OX=9606 GN=OGDH PE=1 SV=1	8	7	14	7	1	1038	117.6	6.92	34.66	7	0	994698	7.75653e+06	2.12612e+06	2.33542e+06	7.80257e+06	5.20546e+06
Q96SM3	CPXM1	Probable carboxypeptidase X1 OS=Homo sapiens OX=9606 GN=CPXM1 PE=2 SV=2	18	8	11	8	1	734	81.6	6.67	34.65	8	0	826240	9.02683e+06	1.12739e+06	1.75868e+06	5.49303e+06	1.45809e+06
H0YKD8	RPL28	60S ribosomal protein L28 OS=Homo sapiens OX=9606 GN=RPL28 PE=1 SV=1	8	2	11	2	1	170	19.1	11.46	34.61	2	0	1.06482e+06	1.08873e+07	2.95197e+06	4.00518e+06	1.47845e+06	2.51956e+06
Q01844	EWSR1	RNA-binding protein EWS OS=Homo sapiens OX=9606 GN=EWSR1 PE=1 SV=1	7	3	13	3	1	656	68.4	9.33	34.52	3	0	1.78929e+06	9.49868e+06	1.54005e+06	4542074	7.25328e+06	1.94852e+06
P46977	STT3A	Dolichyl-diphosphooligosaccharide--protein glycosyltransferase subunit STT3A OS=Homo sapiens OX=9606 GN=STT3A PE=1 SV=2	6	5	16	5	1	705	80.5	8.07	34.48	5	0	9.12377e+06	2.03106e+07	8.93508e+06	12759149	3.78459e+06	1.1371e+07
Q14766	LTBP1	Latent-transforming growth factor beta-binding protein 1 OS=Homo sapiens OX=9606 GN=LTBP1 PE=1 SV=4	4	5	11	5	1	1721	186.7	5.96	34.42	5	0	212394	6.30921e+06	2.17559e+06	2.38941e+06	9.17114e+06	5.39333e+06
J3K000	PEPD	PEPD protein OS=Homo sapiens OX=9606 GN=PEPD PE=2 SV=1	12	6	14	6	1	493	54.5	6	34.37	6	0	1.62897e+06	7.66607e+06	3.90154e+06	1.94798e+06	8.58291e+06	3.9772e+06
B2RDR4	#N/A	cDNA, FLJ96732, highly similar to Homo sapiens testis derived transcript (3 LIM domains) (TES), transcript variant 1, mRNA OS=Homo sapiens OX=9606 PE=2 SV=1	15	4	10	4	1	421	47.9	7.68	34.24	4	0	1.98194e+06	1.77043e+06	3.28528e+06	1.01141e+06	3.37036e+06	1.73511e+06
O94905	ERLIN2	Erlin-2 OS=Homo sapiens OX=9606 GN=ERLIN2 PE=1 SV=1	17	5	11	5	1	339	37.8	5.62	34.17	5	0	7.40015e+06	1.03892e+07	4.6524e+06	8.1637e+06	6.64069e+06	8.65235e+06
Q15631	TSN	Translin OS=Homo sapiens OX=9606 GN=TSN PE=1 SV=1	22	4	11	4	1	228	26.2	6.44	34.16	4	0	4.09686e+06	4.72198e+06	1.54307e+06	2.44707e+06	4.69059e+06	1.43675e+07
Q59G24	#N/A	Activated RNA polymerase II transcription cofactor 4 variant (Fragment) OS=Homo sapiens OX=9606 PE=2 SV=1	34	5	17	5	1	134	15.1	9.38	34.07	5	0	9.57804e+06	1.73724e+07	8.68403e+06	1.12324e+07	1.53529e+07	7.23473e+06
K7ES70	MFAP4	Microfibril-associated glycoprotein 4 OS=Homo sapiens OX=9606 GN=MFAP4 PE=1 SV=1	9	2	9	2	1	280	31.3	5.87	34.06	2	0	2.04463e+06	7.92933e+06	1.81814e+06	4.16224e+06	3.47685e+07	1.05406e+07
A0A024R687	PLEKHC1	Pleckstrin homology domain containing, family C (With FERM domain) member 1, isoform CRA_b OS=Homo sapiens OX=9606 GN=PLEKHC1 PE=4 SV=1	10	6	12	6	1	680	77.8	6.7	34.02	6	0	453941	7.44444e+06	350165	2.2777e+06	8.06878e+06	3.42672e+06
P54709	ATP1B3	Sodium/potassium-transporting ATPase subunit beta-3 OS=Homo sapiens OX=9606 GN=ATP1B3 PE=1 SV=1	18	4	11	4	1	279	31.5	8.35	33.89	4	0	1.83239e+06	4.47258e+06	1.15656e+06	2.51135e+06	3.05773e+06	5.14687e+06
P00387	CYB5R3	NADH-cytochrome b5 reductase 3 OS=Homo sapiens OX=9606 GN=CYB5R3 PE=1 SV=3	38	7	11	7	1	301	34.2	7.59	33.87	7	0	641871	1.67843e+07	1.20624e+06	4.16348e+06	8.88443e+06	2.7548e+06
O94874	UFL1	E3 UFM1-protein ligase 1 OS=Homo sapiens OX=9606 GN=UFL1 PE=1 SV=2	6	4	12	4	1	794	89.5	6.79	33.79	4	0	1.19999e+06	2.69377e+06	703612	1.42985e+06	1.25387e+06	1.47575e+06
Q8IWE2	FAM114A1	Protein NOXP20 OS=Homo sapiens OX=9606 GN=FAM114A1 PE=1 SV=2	18	7	11	7	1	563	60.7	4.68	33.77	7	0	385764	4.78598e+06	1.19479e+06	1.26376e+06	4.20805e+06	1.04385e+06
B0QZ18	CPNE1	Copine-1 OS=Homo sapiens OX=9606 GN=CPNE1 PE=1 SV=1	14	6	14	6	1	542	59.7	6.04	33.62	6	0	4.87314e+06	8.91798e+06	3.55472e+06	7.16694e+06	1.02097e+07	4.43573e+06
P55060	CSE1L	Exportin-2 OS=Homo sapiens OX=9606 GN=CSE1L PE=1 SV=3	8	5	10	5	1	971	110.3	5.77	33.58	5	0	473307	2.29424e+06	177436	516492	687547	720563
Q13724	MOGS	Mannosyl-oligosaccharide glucosidase OS=Homo sapiens OX=9606 GN=MOGS PE=1 SV=5	6	3	11	3	1	837	91.9	8.9	33.51	3	0	788083	2.77974e+06	949257	1.61471e+06	1.29961e+06	1.20373e+06
B2R6F5	#N/A	Protein XRP2 OS=Homo sapiens OX=9606 PE=2 SV=1	8	3	14	3	1	350	39.6	5.12	33.36	3	0	7.035e+06	1.05197e+06	2.3848e+06	5.92157e+06	4.77255e+06	4.88836e+06
Q05DB4	HEBP2	HEBP2 protein (Fragment) OS=Homo sapiens OX=9606 GN=HEBP2 PE=2 SV=1	21	4	12	4	1	214	24	5.38	33.13	4	0	3.83501e+06	3.12156e+06	2.19128e+06	384037	8.00257e+06	1.7055e+06
B2R5R5	#N/A	cDNA, FLJ92583, highly similar to Homo sapiens glycogenin (GYG), mRNA OS=Homo sapiens OX=9606 PE=2 SV=1	11	3	10	3	1	350	39.3	5.53	33.12	3	0	1.05831e+07	521144	3.65776e+06	3.30196e+06	6.67506e+06	1.24082e+06
P15121	AKR1B1	Aldose reductase OS=Homo sapiens OX=9606 GN=AKR1B1 PE=1 SV=3	18	4	11	3	1	316	35.8	6.98	33.08	4	0	1.09544e+06	3.82204e+06	2.84828e+06	NA	6.59376e+06	696403
Q59GM9	#N/A	Alpha-1,4 glucan phosphorylase (Fragment) OS=Homo sapiens OX=9606 PE=2 SV=1	6	4	13	2	1	865	98.8	6.96	32.97	4	0	NA	651024	NA	426475	608707	230372
I3L0A0	TMEM189-UBE2V1	HCG2044781 OS=Homo sapiens OX=9606 GN=TMEM189-UBE2V1 PE=4 SV=1	14	5	14	5	1	370	42.2	6.71	32.63	5	0	6.50429e+06	8.70258e+06	4.90462e+06	4.98448e+06	1.30699e+07	5.8931e+06
A0A384NPY7	LMAN2	Epididymis secretory sperm binding protein OS=Homo sapiens OX=9606 GN=LMAN2 PE=2 SV=1	18	6	13	6	1	356	40.2	6.95	32.56	6	0	5.44851e+06	1.40271e+07	5.95732e+06	1.18606e+07	5.90375e+06	6.26463e+06
Q5U043	#N/A	S-(hydroxymethyl)glutathione dehydrogenase OS=Homo sapiens OX=9606 PE=2 SV=1	23	6	12	6	1	374	39.7	7.49	32.53	6	0	1.44176e+06	9.76362e+06	5.37472e+06	4.61482e+06	1.72175e+07	4.98103e+06
A0A0A6YYJ8	LUC7L2	Putative RNA-binding protein Luc7-like 2 OS=Homo sapiens OX=9606 GN=LUC7L2 PE=4 SV=1	16	5	10	5	1	458	54.2	10.13	32.47	5	0	1.58406e+06	5.77663e+06	626659	1.66941e+06	4.27531e+06	1.05272e+06
P35611	ADD1	Alpha-adducin OS=Homo sapiens OX=9606 GN=ADD1 PE=1 SV=2	13	7	11	7	1	737	80.9	5.83	32.44	7	0	6.07209e+06	7.40803e+06	1.38569e+06	3.38924e+06	3.80776e+06	3.23044e+06
Q13011	ECH1	Delta(3,5)-Delta(2,4)-dienoyl-CoA isomerase, mitochondrial OS=Homo sapiens OX=9606 GN=ECH1 PE=1 SV=2	15	5	11	5	1	328	35.8	8	32.41	5	0	2.51645e+06	1.46019e+07	1.34363e+06	6.24103e+06	1.44089e+07	6.61733e+06
B7Z6L9	#N/A	V-type proton ATPase subunit OS=Homo sapiens OX=9606 PE=2 SV=1	9	4	13	4	1	392	44.6	5.2	32.4	4	0	6.2109e+06	2.99045e+06	3.54183e+06	5.01993e+06	4.6739e+06	6.2294e+06
B3KQQ3	#N/A	cDNA PSEC0016 fis, clone NT2RM1001076, highly similar to Procollagen-lysine,2-oxoglutarate 5-dioxygenase 3 OS=Homo sapiens OX=9606 PE=2 SV=1	14	8	12	8	1	738	84.6	6.2	32.4	8	0	1.34042e+06	9.60638e+06	1.78302e+06	3.91976e+06	1.72832e+06	1.76017e+06
P62249	RPS16	40S ribosomal protein S16 OS=Homo sapiens OX=9606 GN=RPS16 PE=1 SV=2	40	7	14	7	1	146	16.4	10.21	32.35	7	0	1.51812e+06	2.83307e+07	3.9435e+06	5.70975e+06	5.03554e+06	4.56414e+06
Q9NQR4	NIT2	Omega-amidase NIT2 OS=Homo sapiens OX=9606 GN=NIT2 PE=1 SV=1	29	5	11	5	1	276	30.6	7.21	32.24	5	0	344330	908276	1.52024e+06	978400	4.70896e+06	504615
O15400	STX7	Syntaxin-7 OS=Homo sapiens OX=9606 GN=STX7 PE=1 SV=4	11	2	10	2	1	261	29.8	5.55	32.03	2	0	5.48183e+06	2.8246e+06	2.55066e+06	3.08998e+06	5.38436e+06	4.18986e+06
B3KWV6	#N/A	Cytoplasmic FMR1-interacting protein OS=Homo sapiens OX=9606 PE=2 SV=1	5	6	11	3	1	1255	145.4	7.61	32	6	3	1.33831e+06	5.177e+06	1.51618e+06	2.56789e+06	1.97484e+06	2.21503e+06
B9EJA8	MRC1L1	Mannose receptor, C type 1-like 1 OS=Homo sapiens OX=9606 GN=MRC1L1 PE=2 SV=1	5	6	12	6	1	1456	165.9	6.51	32	6	0	566324	2.40632e+06	4.40395e+06	4.36492e+06	3.14908e+06	3.01936e+06
Q14314	FGL2	Fibroleukin OS=Homo sapiens OX=9606 GN=FGL2 PE=1 SV=1	17	6	11	6	1	439	50.2	7.39	31.85	6	0	2.39348e+06	3.40488e+06	5.44968e+06	5.28242e+06	4.62925e+06	2.13448e+06
P00167	CYB5A	Cytochrome b5 OS=Homo sapiens OX=9606 GN=CYB5A PE=1 SV=2	36	3	10	3	1	134	15.3	4.96	31.83	3	0	666260	3.30323e+06	2.30863e+06	2.91835e+06	1.04014e+07	3.01295e+06
Q92688	ANP32B	Acidic leucine-rich nuclear phosphoprotein 32 family member B OS=Homo sapiens OX=9606 GN=ANP32B PE=1 SV=1	21	6	11	2	1	251	28.8	4.06	31.75	6	0	5.44005e+06	NA	1.94733e+06	NA	NA	1.79689e+06
A2J1M8	#N/A	Rheumatoid factor RF-IP12 (Fragment) OS=Homo sapiens OX=9606 PE=2 SV=1	25	2	9	2	1	95	10.7	7.99	31.62	2	0	2.05639e+06	2.14625e+06	5.69189e+06	6.68369e+06	4.39203e+06	2.19657e+06
E5KNY5	LRPPRC	Leucine-rich PPR-motif containing OS=Homo sapiens OX=9606 GN=LRPPRC PE=4 SV=1	8	9	11	9	1	1394	157.8	6.13	31.47	9	0	462883	5.92011e+06	529236	4.08901e+06	3.67889e+06	4.07157e+06
A0A140VJS3	#N/A	Testicular tissue protein Li 149 OS=Homo sapiens OX=9606 PE=2 SV=1	20	6	10	5	1	406	45.6	7.55	31.45	6	1	1.54391e+06	1.12096e+07	3.56729e+06	5.21485e+06	1.1616e+07	4.91744e+06
Q99873	PRMT1	Protein arginine N-methyltransferase 1 OS=Homo sapiens OX=9606 GN=PRMT1 PE=1 SV=3	18	5	9	5	1	371	42.4	5.35	31.34	5	0	1.90913e+06	6.64818e+06	2.01878e+06	4.13038e+06	4.45105e+06	603612
Q8NBJ5	COLGALT1	Procollagen galactosyltransferase 1 OS=Homo sapiens OX=9606 GN=COLGALT1 PE=1 SV=1	16	9	11	9	1	622	71.6	7.31	31.03	9	0	1.20179e+06	1.58189e+07	2.6943e+06	5.6949e+06	3.07755e+06	2.05764e+06
B2RA39	#N/A	cDNA, FLJ94686, highly similar to Homo sapiens complement factor H-related 5 (CFHL5), mRNA OS=Homo sapiens OX=9606 PE=2 SV=1	14	6	11	5	1	569	64.3	7.06	31	6	0	4.1868e+06	2.37226e+06	2.99654e+06	3.76401e+06	1.19479e+06	3.70248e+06
O00391	QSOX1	Sulfhydryl oxidase 1 OS=Homo sapiens OX=9606 GN=QSOX1 PE=1 SV=3	8	5	11	5	1	747	82.5	8.92	30.97	5	0	4.79438e+06	1.31162e+06	2.63771e+06	3.52089e+06	9.46366e+06	1.61068e+07
O15260	SURF4	Surfeit locus protein 4 OS=Homo sapiens OX=9606 GN=SURF4 PE=1 SV=3	11	3	13	3	1	269	30.4	7.78	30.78	3	0	2.99738e+06	6.09015e+06	3.49748e+06	3543628	1.34156e+06	3.01701e+06
P32942	ICAM3	Intercellular adhesion molecule 3 OS=Homo sapiens OX=9606 GN=ICAM3 PE=1 SV=2	12	6	13	6	1	547	59.5	5.43	30.72	6	0	1.48206e+07	948474	4.40088e+06	5.53497e+06	2.51804e+06	8.41397e+06
Q4LE58	EIF4G1	eIF4G1 variant protein (Fragment) OS=Homo sapiens OX=9606 GN=EIF4G1 variant protein PE=2 SV=1	6	7	10	7	1	1624	178	5.31	30.66	7	0	497255	4.57937e+06	1.54492e+06	2.63406e+06	2.05238e+06	1.59135e+06
Q9NR45	NANS	Sialic acid synthase OS=Homo sapiens OX=9606 GN=NANS PE=1 SV=2	15	4	9	4	1	359	40.3	6.74	30.45	4	0	855413	3.61737e+06	1.46659e+06	1.9252e+06	4.58121e+06	2.04968e+06
P62857	RPS28	40S ribosomal protein S28 OS=Homo sapiens OX=9606 GN=RPS28 PE=1 SV=1	36	3	9	3	1	69	7.8	10.7	30.34	3	0	3.62333e+06	2.8166e+07	5.025e+06	7.27817e+06	1.05895e+07	7.18974e+06
Q5JWF2	GNAS	Guanine nucleotide-binding protein G(s) subunit alpha isoforms XLas OS=Homo sapiens OX=9606 GN=GNAS PE=1 SV=2	3	3	12	2	1	1037	111	5.03	30.3	3	0	2.99499e+06	3.6076e+06	1.32882e+06	3.96104e+06	1.9128e+06	1.82861e+06
P11233	RALA	Ras-related protein Ral-A OS=Homo sapiens OX=9606 GN=RALA PE=1 SV=1	19	3	9	2	1	206	23.6	7.11	30.25	3	1	2.64858e+06	6.76572e+06	1.1452e+06	7.38268e+06	6.27084e+06	2.97737e+06
A0A024R4E2	TARDBP	TAR DNA binding protein, isoform CRA_b OS=Homo sapiens OX=9606 GN=TARDBP PE=4 SV=1	9	3	10	3	1	414	44.7	6.19	30.21	3	0	879464	8.07961e+06	1.56282e+06	3.87495e+06	4.43616e+06	1.59978e+06
Q5T9B7	AK1	Adenylate kinase isoenzyme 1 OS=Homo sapiens OX=9606 GN=AK1 PE=1 SV=1	34	6	11	6	1	210	23.4	8.6	30.19	6	0	483470	1.14715e+07	1.14636e+06	3.89978e+06	8.44428e+06	7.80011e+06
P84098	RPL19	60S ribosomal protein L19 OS=Homo sapiens OX=9606 GN=RPL19 PE=1 SV=1	14	4	9	4	1	196	23.5	11.47	30.13	4	0	549444	1.31333e+07	1.15981e+06	3.9791e+06	1.6245e+06	NA
Q96N66	MBOAT7	Lysophospholipid acyltransferase 7 OS=Homo sapiens OX=9606 GN=MBOAT7 PE=1 SV=2	11	4	9	4	1	472	52.7	8.97	30.12	4	0	1.38118e+06	1.06709e+06	852956	4.97987e+06	NA	2.28286e+06
A0A1W2PRS1	SCARB2	Lysosome membrane protein 2 (Fragment) OS=Homo sapiens OX=9606 GN=SCARB2 PE=1 SV=1	11	5	9	5	1	519	58.1	5.15	30.04	5	0	1.50899e+07	4.54535e+06	4.22026e+06	4.56767e+06	6.01765e+06	6.04799e+06
P54577	YARS	Tyrosine--tRNA ligase, cytoplasmic OS=Homo sapiens OX=9606 GN=YARS PE=1 SV=4	14	6	11	6	1	528	59.1	7.05	29.87	6	0	777190	6.48008e+06	2.8687e+06	1.59229e+06	5.0128e+06	3.89644e+06
A0A0A0MRI2	SNX6	Sorting nexin OS=Homo sapiens OX=9606 GN=SNX6 PE=1 SV=1	18	5	10	5	1	418	47.8	6.43	29.82	5	0	1.10039e+06	7.92684e+06	2.80885e+06	6.40152e+06	9.71146e+06	4.10487e+06
A8K6U7	#N/A	cDNA FLJ78252, highly similar to Homo sapiens heterogeneous nuclear ribonucleoprotein U-like 1 (HNRPUL1), transcript variant 1, mRNA OS=Homo sapiens OX=9606 PE=2 SV=1	8	4	8	4	1	856	95.6	6.92	29.67	4	0	819569	2.78512e+06	46747.5	563188	778139	60410
B7Z268	SSBP1	Single-stranded DNA binding protein 1, isoform CRA_c OS=Homo sapiens OX=9606 GN=SSBP1 PE=2 SV=1	19	2	9	2	1	159	18.5	10.1	29.62	2	0	2.69762e+06	7.1584e+06	1.82072e+06	2.27338e+06	4.55574e+06	70247.4
Q13344	#N/A	Fus-like protein (Fragment) OS=Homo sapiens OX=9606 PE=2 SV=1	12	5	11	3	1	528	53.3	9.42	29.54	5	2	1.95827e+06	1.72209e+07	2.45243e+06	5.17322e+06	9.6918e+06	2.84296e+06
P12270	TPR	Nucleoprotein TPR OS=Homo sapiens OX=9606 GN=TPR PE=1 SV=3	4	8	10	8	1	2363	267.1	5.02	29.52	8	0	2.21398e+06	5.61083e+06	1.29483e+06	2.5245e+06	6.43775e+06	2.18366e+06
B5BU01	EIF2S2	Eukaryotic translation initiation factor 2 beta OS=Homo sapiens OX=9606 GN=EIF2S2 PE=2 SV=1	16	5	9	5	1	333	38.3	5.94	29.52	5	0	2.0043e+06	5.75543e+06	673018	2.78686e+06	4.19404e+06	2.01273e+06
V9HWK0	HEL103	Signal recognition particle subunit SRP72 OS=Homo sapiens OX=9606 GN=HEL103 PE=2 SV=1	6	3	9	3	1	671	74.6	9.26	29.51	3	0	944604	4.65191e+06	889419	2.33173e+06	1.33724e+06	NA
A8K4G2	#N/A	Tyrosine-protein kinase OS=Homo sapiens OX=9606 PE=2 SV=1	6	4	12	4	1	635	72	8.25	29.47	4	0	8.06174e+06	381363	4.87196e+06	6.47262e+06	2.48693e+06	5.21818e+06
H3BQK9	MACF1	Microtubule-actin cross-linking factor 1, isoforms 1/2/3/5 OS=Homo sapiens OX=9606 GN=MACF1 PE=1 SV=1	1	5	12	4	1	7592	860.5	5.38	29.45	5	0	500943	1.13602e+06	306470	140696	1.18019e+06	748469
P02795	MT2A	Metallothionein-2 OS=Homo sapiens OX=9606 GN=MT2A PE=1 SV=1	52	2	10	2	1	61	6	7.83	29.45	2	0	1.61645e+06	3.8887e+06	385493	566898	7.07813e+06	912904
Q05655	PRKCD	Protein kinase C delta type OS=Homo sapiens OX=9606 GN=PRKCD PE=1 SV=2	12	7	11	6	1	676	77.5	7.75	29.44	7	1	7.25389e+06	984598	2.55839e+06	7.94078e+06	3.09752e+06	6.74765e+06
A0A2R8Y7H4	PRPS1	Ribose-phosphate pyrophosphokinase OS=Homo sapiens OX=9606 GN=PRPS1 PE=1 SV=1	17	5	10	5	1	321	35.3	7.61	29.21	5	0	7.88082e+07	4.37336e+07	4.94994e+07	4.56675e+07	5.22925e+07	2.14794e+07
P62280	RPS11	40S ribosomal protein S11 OS=Homo sapiens OX=9606 GN=RPS11 PE=1 SV=3	50	9	11	9	1	158	18.4	10.3	29.2	9	0	NA	4.05183e+07	233671	1.25455e+06	2.59272e+06	776750
Q9Y3B3	TMED7	Transmembrane emp24 domain-containing protein 7 OS=Homo sapiens OX=9606 GN=TMED7 PE=1 SV=2	16	3	11	3	1	224	25.2	6.89	29.12	3	0	6.09932e+06	1.0175e+07	6.42057e+06	8.37212e+06	6.53845e+06	8.31034e+06
A8K4V2	#N/A	cDNA FLJ75930, highly similar to Homo sapiens NADH dehydrogenase (ubiquinone) 1 alpha subcomplex, 9, 39kDa (NDUFA9), mRNA OS=Homo sapiens OX=9606 PE=2 SV=1	10	3	11	3	1	377	42.4	9.86	29.06	3	0	355517	933280	291948	629800	853934	833157
Q92743	HTRA1	Serine protease HTRA1 OS=Homo sapiens OX=9606 GN=HTRA1 PE=1 SV=1	9	4	9	4	1	480	51.3	7.83	29.05	4	0	393374	6.00039e+06	4.17897e+06	2.1302e+06	9.43253e+06	8.96621e+06
G3V4U0	FBLN5	Fibulin-5 OS=Homo sapiens OX=9606 GN=FBLN5 PE=1 SV=1	9	4	9	4	1	453	50.8	4.77	29.05	4	0	1.64762e+06	4.12472e+06	3.13571e+06	2.58184e+06	4.5514e+06	1.74108e+06
B2R7B5	#N/A	cDNA, FLJ93365, highly similar to Homo sapiens KH domain containing, RNA binding, signal transduction associated 1 (KHDRBS1), mRNA OS=Homo sapiens OX=9606 PE=2 SV=1	11	4	8	4	1	443	48.2	8.66	29.01	4	0	783207	7.73033e+06	2.63975e+06	3.08627e+06	3.99212e+06	1.77847e+06
P67809	YBX1	Nuclease-sensitive element-binding protein 1 OS=Homo sapiens OX=9606 GN=YBX1 PE=1 SV=3	31	5	9	2	1	324	35.9	9.88	29	5	2	1.84077e+06	1.04005e+07	3.66267e+06	4.04216e+06	7.22645e+06	4.92094e+06
P28799	GRN	Granulins OS=Homo sapiens OX=9606 GN=GRN PE=1 SV=2	14	4	10	4	1	593	63.5	6.83	29	4	0	1.03598e+07	703107	2.02501e+06	1.5357e+06	2.61284e+06	4.19973e+06
A0A024R4N0	hCG_1640809	HCG1640809, isoform CRA_b OS=Homo sapiens OX=9606 GN=hCG_1640809 PE=4 SV=1	10	2	8	2	1	322	35.3	8.15	28.92	2	0	4.21111e+06	6.23213e+06	1.34717e+06	5.10756e+06	4.91964e+06	4.34332e+06
G3V5Z7	PSMA6	Proteasome subunit alpha type OS=Homo sapiens OX=9606 GN=PSMA6 PE=1 SV=1	29	6	10	6	1	252	28.1	6.76	28.82	6	0	5.58102e+06	2.46479e+07	4.90623e+06	5.81061e+06	1.91325e+07	5.61229e+06
P09769	FGR	Tyrosine-protein kinase Fgr OS=Homo sapiens OX=9606 GN=FGR PE=1 SV=2	15	7	11	6	1	529	59.4	5.59	28.81	7	0	6.51669e+06	NA	2.02577e+06	4.10571e+06	NA	1.93286e+06
A8K4T6	#N/A	cDNA FLJ76282, highly similar to Homo sapiens proteasome (prosome, macropain) 26S subunit, non-ATPase, 5 (PSMD5), mRNA OS=Homo sapiens OX=9606 PE=2 SV=1	11	4	9	4	1	504	56.2	5.57	28.63	4	0	1.0431e+06	2.33612e+06	856852	1.51377e+06	2.53797e+06	2.42099e+06
Q53HH4	#N/A	Ras-GTPase-activating protein SH3-domain-binding protein variant (Fragment) OS=Homo sapiens OX=9606 PE=2 SV=1	21	6	11	6	1	466	52.1	5.59	28.61	6	0	351475	4.88938e+06	631417	1.26107e+06	1.94766e+06	1.83077e+06
Q53GG0	#N/A	Epithelial protein lost in neoplasm beta variant (Fragment) OS=Homo sapiens OX=9606 PE=2 SV=1	11	6	9	6	1	759	85.2	6.84	28.6	6	0	NA	9.10653e+06	1.35678e+06	1920313	2.44695e+06	993651
Q6FHQ0	RBBP7	RBBP7 protein (Fragment) OS=Homo sapiens OX=9606 GN=RBBP7 PE=2 SV=1	16	5	10	5	1	425	47.8	5.05	28.41	5	0	3.5718e+06	5.17573e+06	2.29929e+06	2.98389e+06	6.33295e+06	3.83588e+06
P27169	PON1	Serum paraoxonase/arylesterase 1 OS=Homo sapiens OX=9606 GN=PON1 PE=1 SV=3	11	4	10	4	1	355	39.7	5.22	28.29	4	0	3.81752e+06	5.32695e+06	5.157e+06	8.53484e+06	1.49046e+06	4.0747e+06
A8MUS3	RPL23A	60S ribosomal protein L23a OS=Homo sapiens OX=9606 GN=RPL23A PE=1 SV=1	17	4	11	4	1	194	21.9	10.48	28.14	4	0	7.84138e+06	3.9067e+07	1.14396e+07	1.45541e+07	1.57188e+07	8.36682e+06
Q9NZU5	LMCD1	LIM and cysteine-rich domains protein 1 OS=Homo sapiens OX=9606 GN=LMCD1 PE=1 SV=1	29	8	9	8	1	365	40.8	7.93	28.11	8	0	187314	4.16899e+06	2.12166e+06	1.14342e+06	1.23947e+07	2.2131e+06
P22352	GPX3	Glutathione peroxidase 3 OS=Homo sapiens OX=9606 GN=GPX3 PE=1 SV=2	20	3	9	3	1	226	25.5	8.13	28.05	3	0	739757	1.89623e+06	2.89786e+06	3.13777e+06	8.94013e+06	4.68324e+06
B3KQJ0	#N/A	cDNA FLJ90530 fis, clone NT2RP4002187, highly similar to Homo sapiens hydroxysteroid (17-beta) dehydrogenase 12 (HSD17B12), mRNA OS=Homo sapiens OX=9606 PE=2 SV=1	12	3	12	3	1	312	34.3	9.26	28.02	3	0	7.89278e+06	6.25003e+06	1.67317e+06	2.77785e+06	825944	3.87595e+06
Q9Y2Y8	PRG3	Proteoglycan 3 OS=Homo sapiens OX=9606 GN=PRG3 PE=1 SV=2	21	3	9	3	1	225	25.4	4.81	27.97	3	0	3.32419e+06	1.95314e+07	2.18814e+06	2.61533e+07	NA	3.63358e+06
A0A024R3W7	EEF1B2	Eukaryotic translation elongation factor 1 beta 2, isoform CRA_a OS=Homo sapiens OX=9606 GN=EEF1B2 PE=3 SV=1	17	4	8	4	1	225	24.7	4.67	27.95	4	0	5.53784e+06	2.98945e+07	6.44039e+06	10541407	1.75864e+07	8.68289e+06
A0A0A0MSS8	AKR1C3	Aldo-keto reductase family 1 member C3 OS=Homo sapiens OX=9606 GN=AKR1C3 PE=1 SV=1	20	4	7	4	1	323	36.8	7.94	27.95	4	0	NA	3.25826e+06	501815	NA	3.11727e+06	NA
B2R6X6	#N/A	Peptidyl-prolyl cis-trans isomerase OS=Homo sapiens OX=9606 PE=2 SV=1	27	3	7	3	1	207	22	9.5	27.91	3	0	763695	3.18372e+06	1.97789e+06	2.27032e+06	2.94878e+06	2.96091e+06
P16035	TIMP2	Metalloproteinase inhibitor 2 OS=Homo sapiens OX=9606 GN=TIMP2 PE=1 SV=2	13	2	8	2	1	220	24.4	7.49	27.88	2	0	2.98924e+06	4.88913e+06	793133	1.81039e+06	1.35813e+07	4.26946e+06
B2RBE0	#N/A	cDNA, FLJ95462, highly similar to Homo sapiens fatty-acid-Coenzyme A ligase, long-chain 3 (FACL3),mRNA OS=Homo sapiens OX=9606 PE=2 SV=1	6	3	10	2	1	720	80.3	8.46	27.81	3	0	3.20453e+06	1.45468e+06	7.72485e+06	5.70322e+06	1.5055e+07	9.62939e+06
A8K588	#N/A	cDNA FLJ76823, highly similar to Homo sapiens splicing factor, arginine/serine-rich 6 (SFRS6), mRNA OS=Homo sapiens OX=9606 PE=2 SV=1	9	4	8	4	1	344	39.5	11.4	27.8	4	0	1.21082e+07	1.74291e+07	1.13564e+07	9.8623e+06	2.29705e+07	3.13462e+07
Q13835	PKP1	Plakophilin-1 OS=Homo sapiens OX=9606 GN=PKP1 PE=1 SV=2	17	8	8	8	1	747	82.8	9.13	27.79	8	0	NA	NA	NA	825402	408903	1.49345e+07
Q6DD88	ATL3	Atlastin-3 OS=Homo sapiens OX=9606 GN=ATL3 PE=1 SV=1	9	4	9	4	1	541	60.5	5.66	27.75	4	0	1.69747e+06	4.3866e+06	1.86267e+06	3.116e+06	1.00334e+06	1.07557e+06
P08254	MMP3	Stromelysin-1 OS=Homo sapiens OX=9606 GN=MMP3 PE=1 SV=2	15	7	10	6	1	477	53.9	6.16	27.69	7	1	NA	NA	NA	NA	3.09044e+07	8.11865e+06
Q96A33	CCDC47	Coiled-coil domain-containing protein 47 OS=Homo sapiens OX=9606 GN=CCDC47 PE=1 SV=1	14	4	9	4	1	483	55.8	4.87	27.69	4	0	206486	2.26268e+06	207483	353592	980458	665000
F8VXU5	VPS29	Vacuolar protein sorting-associated protein 29 OS=Homo sapiens OX=9606 GN=VPS29 PE=1 SV=1	20	4	10	4	1	214	24	8.18	27.64	4	0	3.03438e+06	8.56191e+06	3.29411e+06	4.40975e+06	3.41906e+06	1.67059e+06
P17927	CR1	Complement receptor type 1 OS=Homo sapiens OX=9606 GN=CR1 PE=1 SV=3	8	5	9	5	1	2039	223.5	6.95	27.44	5	0	2.39162e+06	1.82962e+06	193971	1.8206e+06	326446	304467
A0A087WSV8	NUCB2	Nucleobindin 2, isoform CRA_b OS=Homo sapiens OX=9606 GN=NUCB2 PE=1 SV=1	16	5	8	5	1	420	50.2	5.12	27.38	5	0	364386	3.02019e+06	302963	821470	1.23432e+06	265805
E9PF82	CAMK2D	Calcium/calmodulin-dependent protein kinase type II subunit delta OS=Homo sapiens OX=9606 GN=CAMK2D PE=1 SV=1	13	5	9	3	1	533	60	7.27	27.37	5	1	505367	3.16152e+06	391163	1.3546e+06	4.17128e+06	1.5888e+06
O14786	NRP1	Neuropilin-1 OS=Homo sapiens OX=9606 GN=NRP1 PE=1 SV=3	11	7	10	7	1	923	103.1	5.88	27.37	7	0	NA	3.01903e+06	82111	261195	NA	NA
P11171	EPB41	Protein 4.1 OS=Homo sapiens OX=9606 GN=EPB41 PE=1 SV=4	12	7	9	7	1	864	97	5.58	27.3	7	0	3.00738e+06	8.85976e+06	538603	7.21289e+06	417374	1.174e+06
H0YAC1	KLKB1	Plasma kallikrein (Fragment) OS=Homo sapiens OX=9606 GN=KLKB1 PE=1 SV=1	10	6	9	6	1	686	76.8	8.06	27.21	6	0	2.65749e+06	4.95004e+06	4.307e+06	4.04432e+06	NA	918158
Q9NT62	ATG3	Ubiquitin-like-conjugating enzyme ATG3 OS=Homo sapiens OX=9606 GN=ATG3 PE=1 SV=1	11	3	8	3	1	314	35.8	4.74	27.14	3	0	2.56194e+06	1.94811e+06	2.05717e+06	2.11939e+06	3.33366e+06	2.16494e+06
P62906	RPL10A	60S ribosomal protein L10a OS=Homo sapiens OX=9606 GN=RPL10A PE=1 SV=2	35	6	9	6	1	217	24.8	9.94	27.12	6	0	5.39497e+06	4.62981e+07	6.27825e+06	8.45829e+06	2.03123e+06	5.67674e+06
O75340	PDCD6	Programmed cell death protein 6 OS=Homo sapiens OX=9606 GN=PDCD6 PE=1 SV=1	34	4	8	4	1	191	21.9	5.4	27.12	4	0	3.52141e+06	2.83699e+06	485592	1.07737e+06	883591	2.29194e+06
A0A087WYR3	TPD52L2	Tumor protein D54 OS=Homo sapiens OX=9606 GN=TPD52L2 PE=1 SV=1	26	4	9	4	1	222	23.8	6.55	27.11	4	0	2.46617e+06	7.50173e+06	2.89361e+06	1.88134e+06	5.7768e+06	3.52743e+06
I1SRC5	#N/A	UBE2L3/KRAS fusion protein OS=Homo sapiens OX=9606 PE=2 SV=1	21	5	10	2	1	296	34	8.1	27.05	5	2	1.49503e+06	6.9693e+06	4.96152e+06	3.75098e+06	3.48837e+06	2.02722e+06
B2RAZ4	#N/A	cDNA, FLJ95208, highly similar to Homo sapiens PYD and CARD domain containing (PYCARD), transcript variant 1, mRNA OS=Homo sapiens OX=9606 PE=2 SV=1	27	5	8	5	1	195	21.6	5.64	27	5	0	5.42925e+06	719097	594018	2.05429e+06	5.5048e+06	976373
A0A1B0GTU4	PXN	Paxillin OS=Homo sapiens OX=9606 GN=PXN PE=1 SV=1	6	5	10	5	1	1081	115.8	5.64	27	5	0	4.87765e+06	1.54193e+06	7.07053e+06	3.34547e+06	1.02446e+06	4.18363e+06
O60613	SELENOF	Selenoprotein F OS=Homo sapiens OX=9606 GN=SELENOF PE=1 SV=4	27	4	7	4	1	165	18.1	5.03	26.96	4	0	182868	1.65006e+06	358673	694742	1.1539e+07	664567
P21912	SDHB	Succinate dehydrogenase [ubiquinone] iron-sulfur subunit, mitochondrial OS=Homo sapiens OX=9606 GN=SDHB PE=1 SV=3	16	4	10	4	1	280	31.6	8.76	26.93	4	0	2.74091e+06	6.26129e+06	801426	4.62351e+06	5.05287e+06	4.46258e+06
A0A024R821	EIF3S9	Eukaryotic translation initiation factor 3 subunit B OS=Homo sapiens OX=9606 GN=EIF3S9 PE=3 SV=1	7	5	11	5	1	814	92.4	5	26.86	5	0	496872	4.68314e+06	723509	1.65707e+06	2.34919e+06	709957
B2RD79	#N/A	cDNA, FLJ96494, highly similar to Homo sapiens ubiquitin specific peptidase 14 (tRNA-guanine transglycosylase) (USP14), mRNA OS=Homo sapiens OX=9606 PE=2 SV=1	7	2	7	2	1	494	56	5.3	26.73	2	0	NA	1.271e+06	2.6845e+06	1.98144e+06	5.40671e+06	2.46455e+06
P30520	ADSS	Adenylosuccinate synthetase isozyme 2 OS=Homo sapiens OX=9606 GN=ADSS PE=1 SV=3	14	4	9	4	1	456	50.1	6.55	26.71	4	0	5.42029e+06	587267	3.04306e+06	3.26554e+06	4.69558e+06	2.39553e+06
A0A024R978	C1orf24	Chromosome 1 open reading frame 24, isoform CRA_a OS=Homo sapiens OX=9606 GN=C1orf24 PE=4 SV=1	7	5	11	5	1	928	103.1	4.78	26.46	5	0	5.35539e+06	849341	1.08566e+06	3.47263e+06	3.29335e+06	5.11573e+06
O60716	CTNND1	Catenin delta-1 OS=Homo sapiens OX=9606 GN=CTNND1 PE=1 SV=1	12	8	9	8	1	968	108.1	6.23	26.45	8	0	NA	7.55502e+06	570642	2.9016e+06	2.84711e+06	3.68584e+06
A0A0G2JH68	DIAPH1	Protein diaphanous homolog 1 OS=Homo sapiens OX=9606 GN=DIAPH1 PE=1 SV=1	6	5	9	5	1	1272	141.3	5.39	26.39	5	0	3.64199e+06	728012	541899	1.63077e+06	4.22612e+06	2.0507e+06
A0A2U8J8Z6	IgH	Ig heavy chain variable region (Fragment) OS=Homo sapiens OX=9606 GN=IgH PE=2 SV=1	22	2	8	2	1	98	10.9	6.52	26.39	2	0	3.54302e+07	2.80223e+07	1.0201e+08	5.91258e+07	9.28886e+06	1.36674e+07
D3DPK5	SH3BGRL3	SH3 domain binding glutamic acid-rich protein like 3, isoform CRA_a (Fragment) OS=Homo sapiens OX=9606 GN=SH3BGRL3 PE=4 SV=1	11	2	9	2	1	257	26.8	8.38	26.38	2	0	7.00506e+06	1.67057e+07	3.39907e+06	7.11796e+06	1.59895e+07	9.31335e+06
B4DJ38	#N/A	cDNA FLJ56092, highly similar to Pentatricopeptide repeat protein 1 OS=Homo sapiens OX=9606 PE=2 SV=1	3	2	9	2	1	749	84.1	8.57	26.38	2	0	1.09789e+06	3.39171e+06	865014	2.11909e+06	1.35839e+06	2.86898e+06
P02745	C1QA	Complement C1q subcomponent subunit A OS=Homo sapiens OX=9606 GN=C1QA PE=1 SV=2	14	2	7	2	1	245	26	9.11	26.37	2	0	246021	6.6295e+06	569065	1.39723e+06	2.0315e+06	1.18393e+06
M0QXB4	COPE	Coatomer protein complex, subunit epsilon, isoform CRA_g OS=Homo sapiens OX=9606 GN=COPE PE=1 SV=1	18	5	8	5	1	331	36.9	5.16	26.33	5	0	NA	6.34931e+06	371083	641972	1.44046e+06	188784
P63172	DYNLT1	Dynein light chain Tctex-type 1 OS=Homo sapiens OX=9606 GN=DYNLT1 PE=1 SV=1	51	3	8	3	1	113	12.4	5.08	26.29	3	0	55424.1	372676	103482	246794	220195	104341
Q96G03	PGM2	Phosphoglucomutase-2 OS=Homo sapiens OX=9606 GN=PGM2 PE=1 SV=4	11	5	8	5	1	612	68.2	6.73	26.29	5	0	3.17204e+06	5.84227e+06	2.01024e+06	2.53421e+06	3.40006e+06	347945
A0A0A0MSV9	TAPBP	Tapasin OS=Homo sapiens OX=9606 GN=TAPBP PE=1 SV=1	14	5	9	5	1	504	53.9	7.08	26.28	5	0	2.53729e+06	6.67173e+06	3.33672e+06	2.45698e+06	872421	1.97312e+06
P46939	UTRN	Utrophin OS=Homo sapiens OX=9606 GN=UTRN PE=1 SV=2	3	6	8	6	1	3433	394.2	5.33	26.26	6	0	NA	2.02636e+06	14361	71627.5	395944	81635.3
P22792	CPN2	Carboxypeptidase N subunit 2 OS=Homo sapiens OX=9606 GN=CPN2 PE=1 SV=3	12	4	8	4	1	545	60.5	5.99	26.26	4	0	3.12603e+06	2.98355e+06	2.85583e+06	3.94221e+06	NA	2.46666e+06
A2IPI6	#N/A	HRV Fab 027-VL (Fragment) OS=Homo sapiens OX=9606 PE=2 SV=1	41	3	8	3	1	113	12.4	9.41	26.23	3	0	NA	NA	2.65482e+06	2.09408e+06	NA	NA
A0A0S2Z4C3	FH	Epididymis secretory sperm binding protein (Fragment) OS=Homo sapiens OX=9606 GN=FH PE=2 SV=1	11	3	7	3	1	510	54.6	8.76	26.21	3	0	806704	6.0879e+06	1.64655e+06	3.167e+06	2.93887e+06	3.32563e+06
A8K6V0	#N/A	cDNA FLJ78676, highly similar to Homo sapiens SEC24 related gene family, member D (SEC24D), mRNA OS=Homo sapiens OX=9606 PE=2 SV=1	11	6	7	6	1	1032	112.9	7.25	26.13	6	0	324832	8.15542e+06	751734	1.39532e+06	992881	NA
B4DUC8	MTAP	S-methyl-5'-thioadenosine phosphorylase OS=Homo sapiens OX=9606 GN=MTAP PE=1 SV=1	14	2	7	2	1	300	33.2	7.46	26.09	2	0	160402	816933	89812.5	346632	2.82624e+06	269313
Q59ED7	#N/A	Uncharacterized protein (Fragment) OS=Homo sapiens OX=9606 PE=2 SV=1	16	7	9	7	1	686	77.7	5.64	26.07	7	0	174656	3.15286e+06	1.50303e+06	1.58985e+06	4.246e+06	2.40781e+06
B4DNC2	#N/A	cDNA FLJ51906, highly similar to Heat-shock protein beta-6 OS=Homo sapiens OX=9606 PE=2 SV=1	18	3	8	3	1	196	21.1	6.52	25.86	3	0	42041.8	2.9633e+06	NA	37001.8	5.98707e+06	1.54259e+06
P13498	CYBA	Cytochrome b-245 light chain OS=Homo sapiens OX=9606 GN=CYBA PE=1 SV=3	23	4	19	4	1	195	21	9.54	25.75	4	0	2.98203e+07	2.85272e+06	7.49898e+06	1.82495e+07	6.80518e+06	1.59573e+07
Q04760	GLO1	Lactoylglutathione lyase OS=Homo sapiens OX=9606 GN=GLO1 PE=1 SV=4	28	4	11	4	1	184	20.8	5.31	25.68	4	0	2.7503e+06	5.93191e+06	3.27723e+06	3.39625e+06	6.27866e+06	3.19252e+06
A0A2Z4LCH4	#N/A	Corticosteroid-binding globulin OS=Homo sapiens OX=9606 PE=2 SV=1	10	3	8	3	1	405	45.1	6.04	25.67	3	0	493818	1.84218e+06	1.65525e+06	2.13482e+06	2.5116e+06	523111
Q14520	HABP2	Hyaluronan-binding protein 2 OS=Homo sapiens OX=9606 GN=HABP2 PE=1 SV=1	8	4	9	4	1	560	62.6	6.54	25.62	4	0	1.13126e+06	1.39814e+06	1.27428e+06	4.3288e+06	700087	1.37395e+06
B0AZL7	#N/A	cDNA, FLJ79457, highly similar to Insulin-like growth factor-binding proteincomplex acid labile chain OS=Homo sapiens OX=9606 PE=2 SV=1	9	4	9	4	1	605	66	6.79	25.61	4	0	75924	405176	379966	1.19056e+06	136431	276398
Q12931	TRAP1	Heat shock protein 75 kDa, mitochondrial OS=Homo sapiens OX=9606 GN=TRAP1 PE=1 SV=3	8	5	9	4	1	704	80.1	8.21	25.53	5	0	259703	683038	NA	229633	389473	380777
B4DTU7	#N/A	10-formyltetrahydrofolate dehydrogenase OS=Homo sapiens OX=9606 PE=2 SV=1	11	7	8	7	1	923	101.7	6.52	25.53	7	0	NA	4.41685e+06	431603	641401	986997	NA
A0A024QZY1	JTV1	JTV1 gene, isoform CRA_a OS=Homo sapiens OX=9606 GN=JTV1 PE=4 SV=1	15	3	8	3	1	320	35.3	8.22	25.52	3	0	720299	4.77225e+06	955804	2.19858e+06	1.90978e+06	548971
A0A024RB14	RPS26	40S ribosomal protein S26 OS=Homo sapiens OX=9606 GN=RPS26 PE=3 SV=1	31	3	7	3	1	115	13	11	25.51	3	0	474622	1.53938e+07	1.25267e+06	2.71022e+06	1.20734e+06	1.1421e+06
A0A024R1U8	IGFBP4	Insulin-like growth factor binding protein 4, isoform CRA_a OS=Homo sapiens OX=9606 GN=IGFBP4 PE=4 SV=1	26	3	6	3	1	258	27.9	7.15	25.44	3	0	NA	253672	768001	2.43291e+06	5.70004e+06	896402
A0A1C3PI38	HLA-DPB1	MHC class II antigen OS=Homo sapiens OX=9606 GN=HLA-DPB1 PE=3 SV=1	15	3	8	2	1	258	29.3	7.78	25.37	3	0	NA	3.19498e+06	861639	860792	1.3121e+06	NA
O43684	BUB3	Mitotic checkpoint protein BUB3 OS=Homo sapiens OX=9606 GN=BUB3 PE=1 SV=1	16	4	7	4	1	328	37.1	6.84	25.33	4	0	NA	3.91446e+06	254902	1.49856e+06	2.0536e+06	1.1857e+06
P62917	RPL8	60S ribosomal protein L8 OS=Homo sapiens OX=9606 GN=RPL8 PE=1 SV=2	29	5	7	5	1	257	28	11.03	25.3	5	0	657697	1.75264e+07	1.34717e+06	2.60459e+06	4.22401e+06	1.14182e+06
P30049	ATP5F1D	ATP synthase subunit delta, mitochondrial OS=Homo sapiens OX=9606 GN=ATP5F1D PE=1 SV=2	17	3	9	3	1	168	17.5	5.49	25.24	3	0	6.85171e+06	1.75259e+07	6.46676e+06	9.22755e+06	1.30732e+07	6.62227e+06
Q0VDC6	FKBP1A	Peptidylprolyl isomerase OS=Homo sapiens OX=9606 GN=FKBP1A PE=2 SV=1	26	3	7	3	1	145	15.7	9.17	25.22	3	0	2.98963e+06	1.62526e+07	2.81647e+06	4173964	1.05139e+07	2.18139e+06
Q53Y06	ATP6V1E1	ATPase, H+ transporting, lysosomal 31kDa, V1 subunit E isoform 1 OS=Homo sapiens OX=9606 GN=ATP6V1E1 PE=2 SV=1	15	4	8	4	1	226	26.1	8	25.17	4	0	1.98449e+06	2.3134e+06	1.13952e+06	50961.5	890139	2.5835e+06
P26368	U2AF2	Splicing factor U2AF 65 kDa subunit OS=Homo sapiens OX=9606 GN=U2AF2 PE=1 SV=4	12	3	8	3	1	475	53.5	9.09	25.14	3	0	323820	1.64292e+06	296433	715467	990958	463259
Q59EB6	#N/A	Complement component 1, q subcomponent, receptor 1 variant (Fragment) OS=Homo sapiens OX=9606 PE=2 SV=1	10	5	8	5	1	671	70.4	5.44	25.09	5	0	782335	3.97575e+06	861948	1.08642e+06	4.98131e+06	2.16595e+06
A8K3A8	#N/A	cDNA FLJ75085, highly similar to Homo sapiens glutaminyl-tRNA synthetase (QARS), mRNA OS=Homo sapiens OX=9606 PE=2 SV=1	9	6	9	6	1	775	87.8	7.15	25.05	6	0	375028	4.97531e+06	1.89378e+06	2.34671e+06	4.33219e+06	1.54013e+06
H3BNC9	#N/A	Uncharacterized protein OS=Homo sapiens OX=9606 PE=3 SV=2	8	2	7	2	1	584	64.5	8.78	25.03	2	0	NA	2.34463e+06	NA	NA	3.31985e+06	80652.3
L7N2F9	#N/A	Uncharacterized protein (Fragment) OS=Homo sapiens OX=9606 PE=4 SV=1	20	2	7	2	1	121	13.1	7.96	24.96	2	0	1.94221e+06	3.70975e+06	1.81239e+06	2.27042e+06	2.73845e+06	2.22473e+06
P61020	RAB5B	Ras-related protein Rab-5B OS=Homo sapiens OX=9606 GN=RAB5B PE=1 SV=1	28	5	9	2	1	215	23.7	8.13	24.95	5	0	968830	388267	337345	1.15179e+06	1.3615e+06	723108
Q13045	FLII	Protein flightless-1 homolog OS=Homo sapiens OX=9606 GN=FLII PE=1 SV=2	5	5	9	5	1	1269	144.7	6.05	24.86	5	0	2.09659e+06	1.99251e+06	968125	2.6601e+06	2.62812e+06	2.11179e+06
B5BUI8	DUSP3	Dual specificity phosphatase 3 (Fragment) OS=Homo sapiens OX=9606 GN=DUSP3 PE=2 SV=1	23	3	8	3	1	185	20.6	8.15	24.82	3	0	438978	1.93277e+06	782468	828407	2.62167e+06	2.11547e+06
C9JIF9	APEH	Acylamino-acid-releasing enzyme OS=Homo sapiens OX=9606 GN=APEH PE=1 SV=1	8	5	10	5	1	737	81.6	5.54	24.78	5	0	4.8681e+06	5.87761e+06	2.74734e+06	3.01782e+06	4.80808e+06	5.08854e+06
Q59HD5	#N/A	3-mercaptopyruvate sulfurtransferase variant (Fragment) OS=Homo sapiens OX=9606 PE=2 SV=1	9	2	7	2	1	314	34.7	7.24	24.61	2	0	190094	841233	164703	254297	1.691e+06	371282
Q32MZ4	LRRFIP1	Leucine-rich repeat flightless-interacting protein 1 OS=Homo sapiens OX=9606 GN=LRRFIP1 PE=1 SV=2	12	5	7	5	1	808	89.2	4.65	24.56	5	0	794879	515262	933474	617999	1.26691e+06	730763
A0A024R8M0	GNA13	Guanine nucleotide binding protein (G protein), alpha 13, isoform CRA_a OS=Homo sapiens OX=9606 GN=GNA13 PE=4 SV=1	10	3	9	2	1	377	44	8	24.4	3	0	NA	NA	NA	1.08189e+06	1.25695e+06	1.71895e+06
P10644	PRKAR1A	cAMP-dependent protein kinase type I-alpha regulatory subunit OS=Homo sapiens OX=9606 GN=PRKAR1A PE=1 SV=1	9	4	8	4	1	381	43	5.35	24.39	4	0	2.96494e+06	4.51152e+06	4.02084e+06	5.7138e+06	8.0772e+06	2.02071e+06
A6XND5	#N/A	Ribonuclease T2 OS=Homo sapiens OX=9606 PE=2 SV=1	8	2	7	2	1	307	35.6	8.07	24.31	2	0	1.50597e+06	1.00764e+06	1.40695e+06	253427	1.38197e+06	409974
P63218	GNG5	Guanine nucleotide-binding protein G(I)/G(S)/G(O) subunit gamma-5 OS=Homo sapiens OX=9606 GN=GNG5 PE=1 SV=3	56	2	8	2	1	68	7.3	9.85	24.28	2	0	2.6052e+06	3.03225e+06	1.21081e+06	2838775	1.97893e+06	1.0067e+06
G8JLH6	CD9	Tetraspanin OS=Homo sapiens OX=9606 GN=CD9 PE=1 SV=2	19	3	7	3	1	251	28.1	7.2	24.24	3	0	1.01049e+06	5.37718e+06	1.44115e+06	1.85582e+06	5.62676e+06	5.94125e+06
Q16186	ADRM1	Proteasomal ubiquitin receptor ADRM1 OS=Homo sapiens OX=9606 GN=ADRM1 PE=1 SV=2	11	3	8	3	1	407	42.1	5.07	24.17	3	0	635365	1.92946e+06	716663	895043	712202	868974
Q53GW1	#N/A	Vesicle transport-related protein isoform a variant (Fragment) OS=Homo sapiens OX=9606 PE=2 SV=1	11	4	6	4	1	642	72.3	6.38	24.15	4	0	226934	2.65055e+06	317910	740852	NA	609065
O14737	PDCD5	Programmed cell death protein 5 OS=Homo sapiens OX=9606 GN=PDCD5 PE=1 SV=3	29	3	8	3	1	125	14.3	6.04	24.13	3	0	554007	3.29017e+06	693439	1.09836e+06	2.54318e+06	576075
A8K6Q8	#N/A	cDNA FLJ75881, highly similar to Homo sapiens transferrin receptor (p90, CD71) (TFRC), mRNA OS=Homo sapiens OX=9606 PE=2 SV=1	7	4	10	4	1	760	84.8	6.61	24.13	4	0	978711	1.62295e+06	978795	936097	669172	1.01913e+06
O60493	SNX3	Sorting nexin-3 OS=Homo sapiens OX=9606 GN=SNX3 PE=1 SV=3	21	4	10	4	1	162	18.8	8.66	24.13	4	0	4.50166e+06	9.67303e+06	3.89742e+06	9.78142e+06	1.51572e+07	4.84432e+06
P36269	GGT5	Glutathione hydrolase 5 proenzyme OS=Homo sapiens OX=9606 GN=GGT5 PE=1 SV=2	9	4	8	4	1	586	62.2	7.55	24.09	4	0	NA	5.48032e+06	193543	2.23862e+06	3.81215e+06	3.24872e+06
Q6FHX6	FEN1	Flap endonuclease 1 OS=Homo sapiens OX=9606 GN=FEN1 PE=2 SV=1	7	2	7	2	1	380	42.6	8.62	24.01	2	0	899163	1.27395e+06	894159	697358	1.21079e+06	1.30679e+06
A0A090N8P3	FKBP9	Peptidylprolyl isomerase OS=Homo sapiens OX=9606 GN=FKBP9 PE=4 SV=1	7	4	10	4	1	570	63	5.08	23.91	4	0	4.52653e+06	1.75019e+07	5.11783e+06	2.39543e+06	3.82239e+06	5.39378e+06
Q59H39	#N/A	Signal transducer and activator of transcription (Fragment) OS=Homo sapiens OX=9606 PE=2 SV=1	6	4	9	4	1	788	89.9	6.2	23.88	4	0	4.03504e+06	1.84764e+06	2.63543e+06	3.6832e+06	3.61891e+06	2.42274e+06
O95865	DDAH2	N(G),N(G)-dimethylarginine dimethylaminohydrolase 2 OS=Homo sapiens OX=9606 GN=DDAH2 PE=1 SV=1	21	4	7	4	1	285	29.6	6.01	23.87	4	0	NA	5.83174e+06	863140	2.07565e+06	1.17281e+07	3.32056e+06
A0A286YFF7	PPT1	Palmitoyl-protein thioesterase 1 OS=Homo sapiens OX=9606 GN=PPT1 PE=1 SV=1	19	4	7	4	1	335	37.1	6.52	23.86	4	0	717644	3.40781e+06	922156	1.59547e+06	3.41288e+06	907162
A0A140EDI1	HLA-DPA1	MHC class II antigen OS=Homo sapiens OX=9606 GN=HLA-DPA1 PE=3 SV=1	15	3	8	3	1	260	29.4	5.31	23.86	3	0	712696	2.99714e+06	1.4282e+06	1.2419e+06	3.81536e+06	1.54547e+06
A0A024RD93	PAICS	Phosphoribosylaminoimidazole carboxylase, phosphoribosylaminoimidazole succinocarboxamide synthetase, isoform CRA_c OS=Homo sapiens OX=9606 GN=PAICS PE=3 SV=1	11	4	8	4	1	425	47	7.23	23.83	4	0	1.58154e+06	4.75984e+06	1.77471e+06	2.15914e+06	3.74126e+06	3.07716e+06
P18077	RPL35A	60S ribosomal protein L35a OS=Homo sapiens OX=9606 GN=RPL35A PE=1 SV=2	16	4	10	4	1	110	12.5	11.06	23.78	4	0	2.76439e+06	9.42352e+06	2.97781e+06	3178961	2.53577e+06	3.79959e+06
Q9C0C2	TNKS1BP1	182 kDa tankyrase-1-binding protein OS=Homo sapiens OX=9606 GN=TNKS1BP1 PE=1 SV=4	5	6	8	6	1	1729	181.7	4.86	23.78	6	0	948620	3.15357e+06	1.10885e+06	1.57529e+06	3.89785e+06	1.08377e+06
A0A140VJY7	#N/A	Testicular tissue protein Li 214 OS=Homo sapiens OX=9606 PE=2 SV=1	50	4	9	4	1	123	13.9	5.52	23.77	4	0	670817	3.79161e+06	1.2063e+06	1.51157e+06	1.88122e+06	740877
Q8NE71	ABCF1	ATP-binding cassette sub-family F member 1 OS=Homo sapiens OX=9606 GN=ABCF1 PE=1 SV=2	3	2	8	2	1	845	95.9	6.8	23.77	2	0	250286	NA	210493	780782	200116	812830
Q15746	MYLK	Myosin light chain kinase, smooth muscle OS=Homo sapiens OX=9606 GN=MYLK PE=1 SV=4	3	4	10	3	1	1914	210.6	6.15	23.75	4	1	1.78272e+06	3.79475e+06	1.60703e+06	4.61577e+06	3.66891e+06	3.32036e+06
P0DOX3	#N/A	Immunoglobulin delta heavy chain OS=Homo sapiens OX=9606 PE=1 SV=1	13	4	8	4	1	512	56.2	8.02	23.62	4	0	1.17939e+06	1.83379e+06	9.66642e+06	8.20316e+06	NA	529938
P24752	ACAT1	Acetyl-CoA acetyltransferase, mitochondrial OS=Homo sapiens OX=9606 GN=ACAT1 PE=1 SV=1	18	5	7	5	1	427	45.2	8.85	23.59	5	0	1.31051e+06	8.94301e+06	1.57603e+06	3.27864e+06	4.63496e+06	1.2227e+06
P46063	RECQL	ATP-dependent DNA helicase Q1 OS=Homo sapiens OX=9606 GN=RECQL PE=1 SV=3	14	7	8	7	1	649	73.4	7.88	23.52	7	0	NA	7.83399e+06	563234	1.22808e+06	1.62363e+06	913583
P56537	EIF6	Eukaryotic translation initiation factor 6 OS=Homo sapiens OX=9606 GN=EIF6 PE=1 SV=1	31	4	8	4	1	245	26.6	4.68	23.42	4	0	1.89263e+06	6.20507e+06	486707	2.04549e+06	5.94303e+06	2.62615e+06
Q9Y3F4	STRAP	Serine-threonine kinase receptor-associated protein OS=Homo sapiens OX=9606 GN=STRAP PE=1 SV=1	14	4	7	4	1	350	38.4	5.12	23.42	4	0	862156	4.50368e+06	1.97888e+06	2.06016e+06	4.65632e+06	2.65321e+06
Q99961	SH3GL1	Endophilin-A2 OS=Homo sapiens OX=9606 GN=SH3GL1 PE=1 SV=1	17	4	6	4	1	368	41.5	5.43	23.4	4	0	805996	2.36355e+06	5.73711e+06	2.07614e+06	2.59059e+06	1.78867e+06
Q8N1G4	LRRC47	Leucine-rich repeat-containing protein 47 OS=Homo sapiens OX=9606 GN=LRRC47 PE=1 SV=1	8	3	8	3	1	583	63.4	8.28	23.28	3	0	828155	1.2101e+06	458102	647870	1.54414e+06	931053
V9HWB5	HEL-S-66p	Epididymis secretory sperm binding protein Li 66p OS=Homo sapiens OX=9606 GN=HEL-S-66p PE=2 SV=1	16	4	7	4	1	289	32.6	5.86	23.25	4	0	1.54815e+06	5.08569e+06	1.23347e+06	2.09107e+06	7.26698e+06	2.13551e+06
P84090	ERH	Enhancer of rudimentary homolog OS=Homo sapiens OX=9606 GN=ERH PE=1 SV=1	31	2	8	2	1	104	12.3	5.92	23.24	2	0	1.29292e+06	5.96839e+06	1.95066e+06	3424175	3.70271e+06	2.37115e+06
Q16531	DDB1	DNA damage-binding protein 1 OS=Homo sapiens OX=9606 GN=DDB1 PE=1 SV=1	9	6	8	6	1	1140	126.9	5.26	23.21	6	0	2.28361e+06	3.53058e+06	1.47373e+06	1.68305e+06	4.87846e+06	2.41992e+06
P20851	C4BPB	C4b-binding protein beta chain OS=Homo sapiens OX=9606 GN=C4BPB PE=1 SV=1	18	4	9	4	1	252	28.3	5.14	23.13	4	0	1.16562e+06	4.00687e+06	1.94093e+06	5.41169e+06	1.69591e+06	3.8274e+06
A0A024R572	SF1	Splicing factor 1, isoform CRA_h OS=Homo sapiens OX=9606 GN=SF1 PE=4 SV=1	5	2	8	2	1	639	68.3	8.98	23.07	2	0	202605	947866	193579	1.33312e+06	1.66018e+06	229729
B4DJV9	#N/A	cDNA FLJ60607, highly similar to Acyl-protein thioesterase 1 OS=Homo sapiens OX=9606 PE=2 SV=1	14	3	7	3	1	263	28.3	7.64	23.05	3	0	968186	2.76373e+06	1.57453e+06	2.62493e+06	4.13794e+06	1.04797e+06
A0A384MDR8	#N/A	Epididymis secretory sperm binding protein OS=Homo sapiens OX=9606 PE=2 SV=1	17	5	8	5	1	359	39.2	6.65	23	5	0	2.79818e+06	8.17455e+06	4.08734e+06	3.80654e+06	8.63955e+06	5.40877e+06
M9MML0	FCGR3A	Low affinity immunoglobulin gamma Fc region receptor III-A OS=Homo sapiens OX=9606 GN=FCGR3A PE=4 SV=2	11	4	9	2	1	359	40.2	7.4	22.96	4	2	2.62271e+07	3.66434e+06	3.93177e+06	5.04685e+06	2.6554e+06	1.69916e+06
Q9BXX0	EMILIN2	EMILIN-2 OS=Homo sapiens OX=9606 GN=EMILIN2 PE=1 SV=3	5	3	6	3	1	1053	115.6	6.46	22.89	3	0	575708	3.97826e+06	655921	1.31712e+06	927927	832036
Q9UL89	#N/A	Myosin-reactive immunoglobulin heavy chain variable region (Fragment) OS=Homo sapiens OX=9606 PE=2 SV=1	22	2	7	2	1	116	12.6	9.1	22.89	2	0	1.27037e+07	1.42272e+07	7.97098e+07	43318440	NA	NA
B4E284	#N/A	cDNA FLJ51188, highly similar to N-acetylglucosamine-6-sulfatase (EC3.1.6.14) OS=Homo sapiens OX=9606 PE=2 SV=1	9	5	11	5	1	584	65.8	8.07	22.88	5	0	2.84485e+06	5.15983e+06	3.05736e+06	2.13195e+06	7.4507e+06	1.38989e+06
P20645	M6PR	Cation-dependent mannose-6-phosphate receptor OS=Homo sapiens OX=9606 GN=M6PR PE=1 SV=1	12	2	6	2	1	277	31	5.83	22.87	2	0	737811	3.63645e+06	1.35338e+06	2.39407e+06	2.14629e+06	2.57879e+06
Q5NV69	V1-13	V1-13 protein (Fragment) OS=Homo sapiens OX=9606 GN=V1-13 PE=4 SV=1	47	2	8	2	1	100	10.3	5.17	22.85	2	0	2.61175e+06	4.2131e+06	9.34544e+06	7358819	2.87276e+06	3.07445e+06
D3DP46	SPCS3	Signal peptidase complex subunit 3 OS=Homo sapiens OX=9606 GN=SPCS3 PE=3 SV=1	18	3	10	3	1	180	20.3	8.97	22.81	3	0	3.08605e+06	6.53091e+06	3.55052e+06	6.14157e+06	3.97919e+06	6.37609e+06
Q16881	TXNRD1	Thioredoxin reductase 1, cytoplasmic OS=Homo sapiens OX=9606 GN=TXNRD1 PE=1 SV=3	10	5	8	5	1	649	70.9	7.39	22.7	5	0	888080	2.47651e+06	1.4793e+06	843354	3.29993e+06	1.65741e+06
P50213	IDH3A	Isocitrate dehydrogenase [NAD] subunit alpha, mitochondrial OS=Homo sapiens OX=9606 GN=IDH3A PE=1 SV=1	13	3	7	3	1	366	39.6	6.92	22.69	3	0	NA	4.14053e+06	NA	999880	1.16457e+06	1.29736e+06
A8K335	#N/A	cDNA FLJ76254, highly similar to Homo sapiens gamma-glutamyl hydrolase (GGH), mRNA OS=Homo sapiens OX=9606 PE=2 SV=1	8	2	7	2	1	318	36	7.42	22.67	2	0	1.58491e+06	1.01306e+06	1.50168e+06	911809	2.39744e+06	1.23426e+06
A0A0B4J1Y9	IGHV3-72	Immunoglobulin heavy variable 3-72 OS=Homo sapiens OX=9606 GN=IGHV3-72 PE=3 SV=1	24	3	9	2	1	119	13.2	7.85	22.56	3	0	3.3163e+06	3.39499e+06	1.64211e+07	9525138	2.51465e+06	1.98472e+06
Q9Y5B9	SUPT16H	FACT complex subunit SPT16 OS=Homo sapiens OX=9606 GN=SUPT16H PE=1 SV=1	4	4	8	4	1	1047	119.8	5.66	22.49	4	0	490743	3.26992e+06	1.92789e+06	2.03513e+06	1.48721e+06	1.11016e+06
O43175	PHGDH	D-3-phosphoglycerate dehydrogenase OS=Homo sapiens OX=9606 GN=PHGDH PE=1 SV=4	12	5	10	5	1	533	56.6	6.71	22.49	5	0	605500	6.76071e+06	570085	649060	3.58578e+06	4.27102e+06
Q5T5C7	SARS	Serine--tRNA ligase, cytoplasmic OS=Homo sapiens OX=9606 GN=SARS PE=1 SV=1	12	4	7	4	1	536	61.3	7.06	22.47	4	0	491301	3.22508e+06	681746	1.09555e+06	2.14329e+06	754986
P62829	RPL23	60S ribosomal protein L23 OS=Homo sapiens OX=9606 GN=RPL23 PE=1 SV=1	11	2	10	2	1	140	14.9	10.51	22.42	2	0	2.52441e+06	9.27103e+06	2.32046e+06	3.61224e+06	4.59746e+06	3.43953e+06
Q96CG8	CTHRC1	Collagen triple helix repeat-containing protein 1 OS=Homo sapiens OX=9606 GN=CTHRC1 PE=1 SV=1	18	4	8	4	1	243	26.2	7.99	22.38	4	0	1.23813e+06	1.68949e+07	1.61087e+06	2.56526e+06	6.85962e+06	3.09785e+06
P28074	PSMB5	Proteasome subunit beta type-5 OS=Homo sapiens OX=9606 GN=PSMB5 PE=1 SV=3	14	3	7	3	1	263	28.5	6.92	22.37	3	0	791899	4.01412e+06	1.32326e+06	1.4034e+06	1.46693e+06	933033
Q16698	DECR1	2,4-dienoyl-CoA reductase, mitochondrial OS=Homo sapiens OX=9606 GN=DECR1 PE=1 SV=1	18	5	9	5	1	335	36	9.28	22.37	5	0	2.26133e+06	6.02971e+06	2.5649e+06	4.65819e+06	9.93407e+06	4.69975e+06
Q96I99	SUCLG2	Succinate--CoA ligase [GDP-forming] subunit beta, mitochondrial OS=Homo sapiens OX=9606 GN=SUCLG2 PE=1 SV=2	11	4	8	4	1	432	46.5	6.39	22.35	4	0	942336	4.08942e+06	1.36182e+06	1.64372e+06	4.72007e+06	1.91415e+06
A0A024RAM2	GLRX	Glutaredoxin (Thioltransferase), isoform CRA_c OS=Homo sapiens OX=9606 GN=GLRX PE=4 SV=1	43	3	7	3	1	106	11.8	8.09	22.27	3	0	1.389e+06	5.02443e+06	3.1984e+06	3.00147e+06	6.63802e+06	1.99987e+06
P49327	FASN	Fatty acid synthase OS=Homo sapiens OX=9606 GN=FASN PE=1 SV=3	3	5	7	5	1	2511	273.3	6.44	22.26	5	0	19575.7	3.48807e+06	30921.6	2.1505e+06	2.72131e+06	2.58179e+06
Q86YZ3	HRNR	Hornerin OS=Homo sapiens OX=9606 GN=HRNR PE=1 SV=2	9	4	6	4	1	2850	282.2	10.04	22.23	4	0	89013.4	NA	263248	151217	NA	123350
P46776	RPL27A	60S ribosomal protein L27a OS=Homo sapiens OX=9606 GN=RPL27A PE=1 SV=2	15	3	8	3	1	148	16.6	11	22.2	3	0	1.42871e+06	9.22065e+06	1.83886e+06	2.26985e+06	2.31113e+06	1.70082e+06
B2R6C0	#N/A	Glycerol-3-phosphate dehydrogenase [NAD(+)] OS=Homo sapiens OX=9606 PE=2 SV=1	20	5	6	5	1	349	37.6	6.18	22.2	5	0	NA	NA	NA	NA	2.27276e+07	715295
Q15182	SNRPB	Small nuclear ribonucleoprotein-associated protein OS=Homo sapiens OX=9606 GN=SNRPB PE=2 SV=1	5	2	10	2	1	285	29.7	10.07	22.2	2	0	2.06467e+06	5.87997e+06	1.8688e+06	2.75349e+06	4.21263e+06	2.63026e+06
A0A140VJL3	#N/A	Hypoxanthine phosphoribosyltransferase OS=Homo sapiens OX=9606 PE=2 SV=1	26	5	10	5	1	218	24.6	6.68	22.14	5	0	2.74013e+06	2.88344e+06	1.04231e+06	2.08908e+06	2.59091e+06	2.72248e+06
A0A384MDY8	#N/A	Epididymis secretory sperm binding protein OS=Homo sapiens OX=9606 PE=2 SV=1	21	6	7	6	1	550	61.6	5.4	22.11	6	0	296131	7.46824e+06	NA	876359	2.38398e+06	696072
Q70J99	UNC13D	Protein unc-13 homolog D OS=Homo sapiens OX=9606 GN=UNC13D PE=1 SV=1	8	5	7	5	1	1090	123.2	6.65	22.11	5	0	1.25441e+06	2.45434e+06	NA	2.24926e+06	1.67372e+06	1.27599e+06
P22087	FBL	rRNA 2'-O-methyltransferase fibrillarin OS=Homo sapiens OX=9606 GN=FBL PE=1 SV=2	28	6	7	6	1	321	33.8	10.18	22.06	6	0	1.26828e+06	6.40982e+06	625844	1.46909e+06	4.7052e+06	1.72359e+06
Q9Y3B4	SF3B6	Splicing factor 3B subunit 6 OS=Homo sapiens OX=9606 GN=SF3B6 PE=1 SV=1	22	2	6	2	1	125	14.6	9.38	22.05	2	0	659599	1.42117e+06	NA	NA	1.09238e+06	NA
Q9BX66	SORBS1	Sorbin and SH3 domain-containing protein 1 OS=Homo sapiens OX=9606 GN=SORBS1 PE=1 SV=3	7	6	7	6	1	1292	142.4	6.84	21.97	6	0	NA	NA	NA	NA	5.64222e+06	874398
A0A024R1A4	UBE2L3	Ubiquitin-conjugating enzyme E2L 3, isoform CRA_a OS=Homo sapiens OX=9606 GN=UBE2L3 PE=3 SV=1	49	5	7	2	1	154	17.9	8.51	21.86	5	0	600771	561603	313191	NA	NA	NA
A0A024R1K8	SF3A1	Splicing factor 3a, subunit 1, 120kDa, isoform CRA_a OS=Homo sapiens OX=9606 GN=SF3A1 PE=4 SV=1	8	4	6	4	1	793	88.8	5.22	21.83	4	0	303603	4.57893e+06	222145	1.39934e+06	2.39148e+06	263931
A0A024R0Q4	PLD3	Phospholipase D family, member 3, isoform CRA_b OS=Homo sapiens OX=9606 GN=PLD3 PE=4 SV=1	6	3	8	3	1	490	54.7	6.47	21.82	3	0	353974	4.1072e+06	3.3538e+06	1.97565e+06	2.84608e+06	2.18548e+06
B3KSH1	EIF3F	Eukaryotic translation initiation factor 3 subunit F OS=Homo sapiens OX=9606 GN=EIF3F PE=2 SV=1	12	3	6	3	1	372	39.1	5.45	21.68	3	0	918938	5.25187e+06	1.30765e+06	3.10258e+06	2.85046e+06	2.43305e+06
Q9Y305	ACOT9	Acyl-coenzyme A thioesterase 9, mitochondrial OS=Homo sapiens OX=9606 GN=ACOT9 PE=1 SV=2	10	3	7	3	1	439	49.9	8.6	21.68	3	0	1.02729e+06	4.06911e+06	801515	2.00754e+06	1.84081e+06	1.8961e+06
A0A0A6YYL6	RPL17-C18orf32	Protein RPL17-C18orf32 OS=Homo sapiens OX=9606 GN=RPL17-C18orf32 PE=3 SV=1	19	4	8	4	1	228	26.4	10.1	21.66	4	0	3.02361e+06	1.30024e+07	3.31791e+06	2.85754e+06	4.86242e+06	3.66323e+06
P13716	ALAD	Delta-aminolevulinic acid dehydratase OS=Homo sapiens OX=9606 GN=ALAD PE=1 SV=1	15	4	8	4	1	330	36.3	6.79	21.62	4	0	3.01293e+06	6.3627e+06	1.44245e+06	3.40191e+06	3.68832e+06	3.96844e+06
K7ER74	APOC4-APOC2	APOC4-APOC2 readthrough (NMD candidate) OS=Homo sapiens OX=9606 GN=APOC4-APOC2 PE=1 SV=1	11	2	8	2	1	178	20	6.64	21.6	2	0	6.19009e+06	9.41997e+06	1.66283e+07	1.48167e+07	1.20876e+06	8.20631e+06
A0A024R8Q1	GAA	Glucosidase, alpha acid (Pompe disease, glycogen storage disease type II), isoform CRA_a OS=Homo sapiens OX=9606 GN=GAA PE=3 SV=1	5	4	8	4	1	952	105.3	6	21.55	4	0	777432	1.39639e+06	3.52675e+06	1.44882e+06	4.56288e+06	1.36462e+06
Q96TA1	FAM129B	Niban-like protein 1 OS=Homo sapiens OX=9606 GN=FAM129B PE=1 SV=3	10	4	7	4	1	746	84.1	6.19	21.43	4	0	NA	3.75089e+06	1.69154e+06	1.38328e+06	1.97562e+06	1.67139e+06
Q6IB11	PGRMC1	PGRMC1 protein OS=Homo sapiens OX=9606 GN=PGRMC1 PE=2 SV=1	21	4	7	3	1	195	21.7	4.7	21.4	4	1	1.96006e+06	1.16709e+07	1.7955e+06	2.14446e+06	4.24218e+06	3.14237e+06
O75643	SNRNP200	U5 small nuclear ribonucleoprotein 200 kDa helicase OS=Homo sapiens OX=9606 GN=SNRNP200 PE=1 SV=2	2	4	8	4	1	2136	244.4	6.06	21.37	4	0	NA	3.60188e+06	439466	1.26077e+06	1.42642e+06	678383
A0A075B6R9	IGKV2D-24	Immunoglobulin kappa variable 2D-24 (non-functional) (Fragment) OS=Homo sapiens OX=9606 GN=IGKV2D-24 PE=4 SV=1	38	3	10	3	1	120	13.1	8.87	21.32	3	0	2.1985e+07	2.09966e+07	4.15852e+07	2.88558e+07	1.81528e+07	1.2134e+07
Q00013	MPP1	55 kDa erythrocyte membrane protein OS=Homo sapiens OX=9606 GN=MPP1 PE=1 SV=2	12	3	7	3	1	466	52.3	7.37	21.29	3	0	59716.5	1.74447e+06	71409.9	227946	395088	241938
A0A0S2Z404	RCC1	Regulator of chromosome condensation 1 isoform 2 (Fragment) OS=Homo sapiens OX=9606 GN=RCC1 PE=2 SV=1	10	3	7	3	1	452	48.1	8.16	21.28	3	0	912269	956419	1.05641e+06	933228	678071	1.78012e+06
A0N7J6	#N/A	REV25-2 (Fragment) OS=Homo sapiens OX=9606 PE=2 SV=1	22	2	7	2	1	134	14.5	6.57	21.27	2	0	1.46953e+06	3.51019e+06	6.38575e+06	5.45601e+06	1.74742e+06	2.05533e+06
A0A024R1U0	RANGAP1	Ran GTPase activating protein 1, isoform CRA_d OS=Homo sapiens OX=9606 GN=RANGAP1 PE=4 SV=1	8	3	7	3	1	587	63.5	4.68	21.22	3	0	110368	1.28512e+06	519244	925781	939697	580315
Q08431	MFGE8	Lactadherin OS=Homo sapiens OX=9606 GN=MFGE8 PE=1 SV=3	16	4	6	4	1	387	43.1	8.15	21.17	4	0	NA	390672	NA	NA	5.45355e+06	3.10072e+06
A0A3B3ISX9	TNXB	Tenascin-X OS=Homo sapiens OX=9606 GN=TNXB PE=4 SV=1	4	6	7	6	1	4491	485.1	5.34	21.17	6	0	6.74329e+06	NA	NA	146244	1.02078e+07	2.91337e+06
A0A0A0MRJ7	F5	Coagulation factor V OS=Homo sapiens OX=9606 GN=F5 PE=1 SV=1	3	5	7	5	1	2229	252.1	6.05	21.16	5	0	493593	1.68093e+06	4.52755e+06	3.75494e+06	2.23341e+06	1.99423e+06
A0A024R7M5	DOK3	Docking protein 3, isoform CRA_a OS=Homo sapiens OX=9606 GN=DOK3 PE=4 SV=1	13	4	7	4	1	496	53.3	7.77	21.14	4	0	2.08435e+06	NA	606522	2.25441e+06	1.7322e+06	1.02558e+06
O43488	AKR7A2	Aflatoxin B1 aldehyde reductase member 2 OS=Homo sapiens OX=9606 GN=AKR7A2 PE=1 SV=3	18	3	6	3	1	359	39.6	7.17	21.01	3	0	870772	3.49331e+06	1.12214e+06	1.86869e+06	2.73787e+06	1.10066e+06
P49821	NDUFV1	NADH dehydrogenase [ubiquinone] flavoprotein 1, mitochondrial OS=Homo sapiens OX=9606 GN=NDUFV1 PE=1 SV=4	14	4	7	4	1	464	50.8	8.21	20.96	4	0	1.60933e+06	1.83376e+06	88259.8	1.98386e+06	2.06013e+06	847157
Q9Y3D6	FIS1	Mitochondrial fission 1 protein OS=Homo sapiens OX=9606 GN=FIS1 PE=1 SV=2	24	3	8	3	1	152	16.9	8.79	20.9	3	0	1.10568e+06	3.46922e+06	1.15484e+06	1.63854e+06	1.47582e+06	2.75049e+06
P32456	GBP2	Guanylate-binding protein 2 OS=Homo sapiens OX=9606 GN=GBP2 PE=1 SV=3	7	3	6	3	1	591	67.2	5.71	20.79	3	0	NA	854370	436368	340660	823871	537408
P34897	SHMT2	Serine hydroxymethyltransferase, mitochondrial OS=Homo sapiens OX=9606 GN=SHMT2 PE=1 SV=3	14	6	7	5	1	504	56	8.53	20.78	6	0	1.02285e+06	6.1209e+06	2.52904e+06	3.07895e+06	2.65125e+06	3.92657e+06
V9HWJ1	HEL-S-64p	Glutathione synthetase OS=Homo sapiens OX=9606 GN=HEL-S-64p PE=2 SV=1	11	4	7	4	1	474	52.4	5.92	20.78	4	0	3.97226e+06	1.5015e+07	682311	1.9059e+06	2.96472e+07	1.45526e+07
A0A3B3ITT5	RPL29	60S ribosomal protein L29 OS=Homo sapiens OX=9606 GN=RPL29 PE=4 SV=1	10	2	6	2	1	167	18.5	11.55	20.73	2	0	2.74337e+06	1.56292e+07	5.45588e+06	1974911	4.32298e+06	2.52099e+06
P30273	FCER1G	High affinity immunoglobulin epsilon receptor subunit gamma OS=Homo sapiens OX=9606 GN=FCER1G PE=1 SV=1	23	2	7	2	1	86	9.7	7.12	20.71	2	0	7.06116e+06	4.10244e+06	4.95341e+06	6.57987e+06	4.20997e+06	7.27441e+06
P05771	PRKCB	Protein kinase C beta type OS=Homo sapiens OX=9606 GN=PRKCB PE=1 SV=4	10	6	9	5	1	671	76.8	7.01	20.6	6	0	3.45968e+06	429388	821349	3.28021e+06	389933	2.48586e+06
P35659	DEK	Protein DEK OS=Homo sapiens OX=9606 GN=DEK PE=1 SV=1	9	3	8	3	1	375	42.6	8.56	20.58	3	0	2.03574e+06	3.65365e+06	930930	2.77503e+06	3.05204e+06	2.25228e+06
F6WQW2	RANBP1	Ran-specific GTPase-activating protein OS=Homo sapiens OX=9606 GN=RANBP1 PE=1 SV=1	12	2	7	2	1	278	31.9	8.75	20.57	2	0	2.35259e+06	3.34933e+06	1.20097e+06	2.7584e+06	2.52424e+06	3.12091e+06
A0A1U9X8E2	#N/A	Proteasome subunit beta OS=Homo sapiens OX=9606 PE=3 SV=1	21	3	6	3	1	219	23.2	5.02	20.52	3	0	2.21719e+06	4.49019e+06	1.14633e+06	1.27087e+06	1.2591e+06	989066
A0A0X9UWM4	#N/A	IBM-A3 heavy chain variable region (Fragment) OS=Homo sapiens OX=9606 PE=2 SV=1	20	2	6	2	1	127	14.4	8.37	20.43	2	0	1.54001e+06	2.07378e+06	7.82784e+06	5.05502e+06	NA	NA
P54886	ALDH18A1	Delta-1-pyrroline-5-carboxylate synthase OS=Homo sapiens OX=9606 GN=ALDH18A1 PE=1 SV=2	12	6	6	6	1	795	87.2	7.12	20.39	6	0	NA	6.56622e+06	850887	484637	1.34016e+06	832051
Q9NTI5	PDS5B	Sister chromatid cohesion protein PDS5 homolog B OS=Homo sapiens OX=9606 GN=PDS5B PE=1 SV=1	2	2	7	2	1	1447	164.6	8.47	20.33	2	0	127264	419488	105628	222866	142931	143243
P02775	PPBP	Platelet basic protein OS=Homo sapiens OX=9606 GN=PPBP PE=1 SV=3	32	4	6	4	1	128	13.9	8.79	20.32	4	0	1.23811e+06	9.03345e+06	1.08848e+06	3.40421e+06	2.9024e+06	806545
C9IZQ1	SSR1	Translocon-associated protein subunit alpha OS=Homo sapiens OX=9606 GN=SSR1 PE=1 SV=1	11	3	8	3	1	298	33.9	4.69	20.29	3	0	1.71892e+06	1.40419e+07	2.2165e+06	5.0006e+06	4.39877e+06	2.35436e+06
A0A024R648	TIMM9	Translocase of inner mitochondrial membrane 9 homolog (Yeast), isoform CRA_a OS=Homo sapiens OX=9606 GN=TIMM9 PE=4 SV=1	35	2	7	2	1	89	10.4	7.21	20.26	2	0	369720	1.46736e+06	296262	1.24633e+06	1.85442e+06	579555
Q14165	MLEC	Malectin OS=Homo sapiens OX=9606 GN=MLEC PE=1 SV=1	9	2	7	2	1	292	32.2	5.41	20.19	2	0	1.46248e+06	4.09013e+06	1.5317e+06	2.05559e+06	2.1125e+06	2.0977e+06
Q9H3N1	TMX1	Thioredoxin-related transmembrane protein 1 OS=Homo sapiens OX=9606 GN=TMX1 PE=1 SV=1	15	4	8	4	1	280	31.8	4.98	20.18	4	0	4.16846e+06	1.33447e+07	4.23298e+06	1.01234e+07	8.54752e+06	9.37988e+06
P01040	CSTA	Cystatin-A OS=Homo sapiens OX=9606 GN=CSTA PE=1 SV=1	50	3	7	3	1	98	11	5.5	20.14	3	0	2.25624e+06	NA	917439	654287	2.0281e+06	1.29048e+06
B4DT57	#N/A	cDNA FLJ61383, highly similar to Serine/threonine-protein kinase 24 OS=Homo sapiens OX=9606 PE=2 SV=1	10	3	6	2	1	450	50	5.6	20.07	3	1	711149	1.89297e+06	438397	1.95138e+06	2.26422e+06	1.25708e+06
Q96HE7	ERO1A	ERO1-like protein alpha OS=Homo sapiens OX=9606 GN=ERO1A PE=1 SV=2	12	4	6	4	1	468	54.4	5.68	20.02	4	0	3.02537e+06	1.36286e+06	793758	2.24663e+06	2.01554e+06	2.89948e+06
A8K940	#N/A	cDNA FLJ77630, highly similar to Homo sapiens BPY2 interacting protein 1, mRNA OS=Homo sapiens OX=9606 PE=1 SV=1	4	3	8	3	1	1059	112.2	7.3	19.94	3	0	625505	1.11123e+06	338728	928724	1.82181e+06	613375
A0A024R2C5	VPS4B	Vacuolar protein sorting 4B (Yeast), isoform CRA_a OS=Homo sapiens OX=9606 GN=VPS4B PE=3 SV=1	8	2	5	2	1	444	49.3	7.23	19.86	2	0	943446	540316	525855	1.13019e+06	1.3322e+06	1.01434e+06
P06703	S100A6	Protein S100-A6 OS=Homo sapiens OX=9606 GN=S100A6 PE=1 SV=1	19	3	9	3	1	90	10.2	5.48	19.85	3	0	2.61251e+07	4.4287e+07	2.41406e+07	1.86657e+07	4.91535e+07	2.05539e+07
A0A024RD15	MAPK14	Mitogen-activated protein kinase OS=Homo sapiens OX=9606 GN=MAPK14 PE=4 SV=1	8	3	9	2	1	360	41.3	5.78	19.75	3	0	1.73659e+06	NA	NA	NA	NA	NA
P13473	LAMP2	Lysosome-associated membrane glycoprotein 2 OS=Homo sapiens OX=9606 GN=LAMP2 PE=1 SV=2	6	3	10	3	1	410	44.9	5.63	19.75	3	0	4.80584e+06	5.87877e+06	3.50051e+06	3638330	5.57322e+06	1.84356e+06
Q59FZ4	#N/A	Serine/threonine kinase 4 variant (Fragment) OS=Homo sapiens OX=9606 PE=2 SV=1	10	4	7	4	1	511	57.8	5.16	19.74	4	0	3.37874e+06	NA	1.83174e+06	2.55417e+06	605596	393964
P61803	DAD1	Dolichyl-diphosphooligosaccharide--protein glycosyltransferase subunit DAD1 OS=Homo sapiens OX=9606 GN=DAD1 PE=1 SV=3	19	2	7	2	1	113	12.5	7.08	19.74	2	0	2.62173e+06	7.32692e+06	2.49232e+06	3.57437e+06	2.65879e+06	5.0594e+06
Q92556	ELMO1	Engulfment and cell motility protein 1 OS=Homo sapiens OX=9606 GN=ELMO1 PE=1 SV=2	5	2	6	2	1	727	83.8	6.28	19.69	2	0	2.36102e+06	NA	113712	964076	1.24378e+06	1.38651e+06
O43294	TGFB1I1	Transforming growth factor beta-1-induced transcript 1 protein OS=Homo sapiens OX=9606 GN=TGFB1I1 PE=1 SV=2	13	4	8	4	1	461	49.8	7.03	19.68	4	0	106096	3.37457e+06	632000	1.64065e+06	4.74972e+06	2.30841e+06
P61081	UBE2M	NEDD8-conjugating enzyme Ubc12 OS=Homo sapiens OX=9606 GN=UBE2M PE=1 SV=1	18	3	8	3	1	183	20.9	7.69	19.61	3	0	1.61166e+06	3.50506e+06	2.16504e+06	1.92062e+06	4.4433e+06	3.19548e+06
Q9MY63	HLA-Cw	Leucocyte antigen (Fragment) OS=Homo sapiens OX=9606 GN=HLA-Cw PE=3 SV=1	5	2	6	2	1	229	26.4	7.15	19.58	2	0	NA	NA	NA	NA	NA	NA
D3DVW9	PTPNS1	Protein tyrosine phosphatase, non-receptor type substrate 1, isoform CRA_a OS=Homo sapiens OX=9606 GN=PTPNS1 PE=4 SV=1	6	2	6	2	1	504	54.9	6.98	19.5	2	0	2.14721e+06	1.49139e+06	227698	1.61491e+06	3.30621e+06	2.85986e+06
V9HVZ6	HEL-68	Actin-related protein 2/3 complex subunit OS=Homo sapiens OX=9606 GN=HEL-68 PE=2 SV=1	14	3	6	2	1	370	41.5	8.18	19.34	3	0	7.54173e+06	3.1428e+06	3.14202e+06	11682125	1.48749e+07	1.09059e+07
Q9Y230	RUVBL2	RuvB-like 2 OS=Homo sapiens OX=9606 GN=RUVBL2 PE=1 SV=3	12	4	6	4	1	463	51.1	5.64	19.32	4	0	1.49275e+06	2.22574e+06	1.08748e+06	1.00843e+06	293118	2.98388e+06
Q9Y4K0	LOXL2	Lysyl oxidase homolog 2 OS=Homo sapiens OX=9606 GN=LOXL2 PE=1 SV=1	5	3	6	3	1	774	86.7	6.38	19.27	3	0	541793	1.71728e+06	2.59682e+06	1.0359e+06	1.96462e+06	543801
Q9NSD9	FARSB	Phenylalanine--tRNA ligase beta subunit OS=Homo sapiens OX=9606 GN=FARSB PE=1 SV=3	8	4	7	4	1	589	66.1	6.84	19.27	4	0	568246	3.28735e+06	NA	1235446	192188	719501
B2R960	#N/A	cDNA, FLJ94230, highly similar to Homo sapiens thioredoxin-like 1 (TXNL1), mRNA OS=Homo sapiens OX=9606 PE=2 SV=1	26	5	7	5	1	289	32.2	4.96	19.2	5	0	396498	5.66913e+06	1.42333e+06	2.10158e+06	3.61207e+06	4.01182e+06
Q13409	DYNC1I2	Cytoplasmic dynein 1 intermediate chain 2 OS=Homo sapiens OX=9606 GN=DYNC1I2 PE=1 SV=3	9	2	5	2	1	638	71.4	5.2	19.14	2	0	276069	2.60899e+06	702719	371707	1.18832e+06	456495
P49588	AARS	Alanine--tRNA ligase, cytoplasmic OS=Homo sapiens OX=9606 GN=AARS PE=1 SV=2	7	6	8	6	1	968	106.7	5.53	19.09	6	0	574358	4.77729e+06	1.31505e+06	1.01845e+06	2.26244e+06	1.24003e+06
Q5M7Z5	GRHPR	GRHPR protein (Fragment) OS=Homo sapiens OX=9606 GN=GRHPR PE=2 SV=1	17	3	5	3	1	341	36.8	6.35	19.09	3	0	406972	2.33158e+06	NA	1.10838e+06	3.37395e+06	NA
O94832	MYO1D	Unconventional myosin-Id OS=Homo sapiens OX=9606 GN=MYO1D PE=1 SV=2	5	4	7	4	1	1006	116.1	9.39	19.08	4	0	NA	3.23075e+06	21394.9	1.39987e+06	1.33512e+06	1.19105e+06
A0A024R3T8	PARP1	Poly [ADP-ribose] polymerase OS=Homo sapiens OX=9606 GN=PARP1 PE=4 SV=1	8	6	6	6	1	1014	113	8.88	19.08	6	0	90973.3	6.65443e+06	950271	2.68515e+06	675732	578409
O95373	IPO7	Importin-7 OS=Homo sapiens OX=9606 GN=IPO7 PE=1 SV=1	4	3	6	3	1	1038	119.4	4.82	19.07	3	0	35539	2.78037e+06	80684.2	1.74606e+06	1.0161e+06	1.39096e+06
O15173	PGRMC2	Membrane-associated progesterone receptor component 2 OS=Homo sapiens OX=9606 GN=PGRMC2 PE=1 SV=1	14	3	8	2	1	223	23.8	4.88	19.01	3	0	2.02383e+06	4.09742e+06	2.00325e+06	2.33916e+06	5.04343e+06	3.3917e+06
P61225	RAP2B	Ras-related protein Rap-2b OS=Homo sapiens OX=9606 GN=RAP2B PE=1 SV=1	13	2	7	2	1	183	20.5	4.81	19.01	2	0	2.14094e+06	2.91761e+06	1.136e+06	3.20226e+06	1.13905e+06	2.34745e+06
Q6ZNJ1	NBEAL2	Neurobeachin-like protein 2 OS=Homo sapiens OX=9606 GN=NBEAL2 PE=1 SV=2	2	4	6	4	1	2754	302.3	6.38	18.99	4	0	1.19535e+06	NA	235330	1.02739e+06	401666	1.17374e+06
O43776	NARS	Asparagine--tRNA ligase, cytoplasmic OS=Homo sapiens OX=9606 GN=NARS PE=1 SV=1	9	4	6	4	1	548	62.9	6.25	18.97	4	0	1.37084e+06	2.74759e+06	758916	1.25358e+06	1.90684e+06	2.41634e+06
G3V180	DPP3	Dipeptidyl peptidase 3 OS=Homo sapiens OX=9606 GN=DPP3 PE=1 SV=1	5	2	5	2	1	757	84.3	5.03	18.96	2	0	NA	NA	NA	NA	NA	NA
A0A024R7N2	ATP13A1	Cation-transporting ATPase OS=Homo sapiens OX=9606 GN=ATP13A1 PE=3 SV=1	3	3	6	3	1	1204	132.9	8.13	18.93	3	0	224771	1.72671e+06	400728	495038	679193	NA
Q9H8Y8	GORASP2	Golgi reassembly-stacking protein 2 OS=Homo sapiens OX=9606 GN=GORASP2 PE=1 SV=3	12	3	5	3	1	452	47.1	4.82	18.93	3	0	499839	4.75524e+06	898739	2.26632e+06	2.42862e+06	1.22663e+06
M0QZR4	ARHGEF1	Rho guanine nucleotide exchange factor 1 OS=Homo sapiens OX=9606 GN=ARHGEF1 PE=1 SV=1	6	5	7	5	1	968	108.3	6.15	18.89	5	0	2274106	2.56932e+06	2.09958e+06	3.00651e+06	1.49588e+06	2.7181e+06
Q59G75	#N/A	Isoleucyl-tRNA synthetase, cytoplasmic variant (Fragment) OS=Homo sapiens OX=9606 PE=2 SV=1	3	4	7	4	1	1279	146.3	6.35	18.81	4	0	66911.7	5.49768e+06	519250	1.44843e+06	1.59694e+06	1.01383e+06
P60866	RPS20	40S ribosomal protein S20 OS=Homo sapiens OX=9606 GN=RPS20 PE=1 SV=1	23	2	6	2	1	119	13.4	9.94	18.76	2	0	NA	1.47398e+07	791777	1.91516e+06	2.6754e+06	318279
A0A2R8Y4T1	TNS1	Tensin-1 OS=Homo sapiens OX=9606 GN=TNS1 PE=1 SV=1	4	5	6	5	1	1860	199.4	8.34	18.7	5	0	NA	4.64779e+06	303342	220732	8.18947e+06	2.49238e+06
A0A140VJW3	SUSD2	Sushi domain containing 2, isoform CRA_a OS=Homo sapiens OX=9606 GN=SUSD2 PE=2 SV=1	10	4	5	4	1	822	90.2	6.28	18.7	4	0	NA	3.41684e+06	156008	NA	2.04138e+06	264775
Q9HCB6	SPON1	Spondin-1 OS=Homo sapiens OX=9606 GN=SPON1 PE=1 SV=2	10	5	6	5	1	807	90.9	6.11	18.69	5	0	469804	4.62759e+06	NA	NA	3.62428e+06	NA
X6R8A1	CTSA	Carboxypeptidase OS=Homo sapiens OX=9606 GN=CTSA PE=1 SV=1	5	2	6	2	1	498	56.2	6.61	18.64	2	0	1.47659e+06	3.6146e+06	2.21375e+06	2.1032e+06	2.06367e+06	793797
A0A087WVC6	PTPRJ	Receptor-type tyrosine-protein phosphatase eta OS=Homo sapiens OX=9606 GN=PTPRJ PE=1 SV=1	6	6	7	6	1	1342	146.5	5.62	18.61	6	0	6.38081e+06	519404	521454	5.05184e+06	2.02435e+06	4.14804e+06
P63173	RPL38	60S ribosomal protein L38 OS=Homo sapiens OX=9606 GN=RPL38 PE=1 SV=2	36	2	5	2	1	70	8.2	10.1	18.59	2	0	NA	9.24319e+06	NA	767781	1.16328e+06	NA
B3KME2	#N/A	cDNA FLJ10772 fis, clone NT2RP4000243, highly similar to Cartilage-associated protein OS=Homo sapiens OX=9606 PE=2 SV=1	19	8	8	8	1	401	46.5	5.85	18.48	8	0	1.59717e+06	1.61882e+07	3.6574e+06	2.18415e+06	1.35869e+06	1.91235e+06
Q63ZY3	KANK2	KN motif and ankyrin repeat domain-containing protein 2 OS=Homo sapiens OX=9606 GN=KANK2 PE=1 SV=1	7	5	6	5	1	851	91.1	5.63	18.46	5	0	NA	2.82888e+06	24782.6	481902	1.97944e+06	736235
Q9UBV2	SEL1L	Protein sel-1 homolog 1 OS=Homo sapiens OX=9606 GN=SEL1L PE=1 SV=3	5	2	6	2	1	794	88.7	5.39	18.45	2	0	761250	1.03783e+06	550845	504486	718535	934222
Q99584	S100A13	Protein S100-A13 OS=Homo sapiens OX=9606 GN=S100A13 PE=1 SV=1	39	5	6	5	1	98	11.5	6.16	18.39	5	0	1.13572e+06	4.19101e+06	2.25497e+06	2.39455e+06	3.32454e+06	1.55058e+06
B2RCM5	#N/A	cDNA, FLJ96160, highly similar to Homo sapiens EGF-containing fibulin-like extracellular matrix protein 2 (EFEMP2), mRNA OS=Homo sapiens OX=9606 PE=2 SV=1	9	3	6	3	1	443	49.3	4.94	18.22	3	0	428341	3.66463e+06	1.50778e+06	1.08248e+06	3.56711e+06	1.9062e+06
P36957	DLST	Dihydrolipoyllysine-residue succinyltransferase component of 2-oxoglutarate dehydrogenase complex, mitochondrial OS=Homo sapiens OX=9606 GN=DLST PE=1 SV=4	8	3	6	3	1	453	48.7	8.95	18.22	3	0	1.19082e+06	8.68441e+06	1.97154e+06	4.08381e+06	6.92629e+06	3.26668e+06
P08574	CYC1	Cytochrome c1, heme protein, mitochondrial OS=Homo sapiens OX=9606 GN=CYC1 PE=1 SV=3	9	2	5	2	1	325	35.4	9	18.21	2	0	594032	3.11195e+06	1.10722e+06	2.00981e+06	4.14824e+06	NA
A0A2R3XZB7	STING	Stimulator of interferon protein OS=Homo sapiens OX=9606 GN=STING PE=2 SV=1	8	2	6	2	1	379	42.2	7.21	18.17	2	0	347107	NA	415799	757336	NA	547486
Q9BS40	LXN	Latexin OS=Homo sapiens OX=9606 GN=LXN PE=1 SV=2	12	2	6	2	1	222	25.7	5.78	18.15	2	0	1.07964e+06	6.31368e+06	751047	2.21226e+06	7.65026e+06	2.02529e+06
O00469	PLOD2	Procollagen-lysine,2-oxoglutarate 5-dioxygenase 2 OS=Homo sapiens OX=9606 GN=PLOD2 PE=1 SV=2	8	5	7	5	1	737	84.6	6.71	18.14	5	0	1.06239e+06	3.64053e+06	3.18041e+06	384892	1.37195e+06	829551
Q13151	HNRNPA0	Heterogeneous nuclear ribonucleoprotein A0 OS=Homo sapiens OX=9606 GN=HNRNPA0 PE=1 SV=1	21	4	6	4	1	305	30.8	9.29	18.14	4	0	NA	5.76179e+06	397505	558807	7.02016e+06	398871
A8K7F7	#N/A	cDNA FLJ76913, highly similar to Homo sapiens F-box protein 7 (FBXO7), mRNA OS=Homo sapiens OX=9606 PE=2 SV=1	5	2	6	2	1	522	58.5	6.55	18.12	2	0	645945	982027	NA	672185	177935	786024
Q0PNF2	#N/A	FEX1 OS=Homo sapiens OX=9606 PE=2 SV=1	3	6	7	6	1	2570	275.3	6.49	18.03	6	0	NA	827566	355221	939703	966812	266557
A0A0G2JRQ6	#N/A	Uncharacterized protein (Fragment) OS=Homo sapiens OX=9606 PE=1 SV=4	22	2	7	2	1	117	12.7	8.29	18.02	2	0	1.14115e+06	3.08924e+06	1.05982e+07	7.47254e+06	993919	1.58451e+06
A0A109PW74	#N/A	IBM-B3 light chain variable region (Fragment) OS=Homo sapiens OX=9606 PE=2 SV=1	28	2	5	2	1	106	11.4	6.54	18	2	0	3.64205e+06	4.24843e+06	1.17726e+07	8.69455e+06	NA	1.60991e+06
A0A024R9D2	MTDH	Metadherin, isoform CRA_a OS=Homo sapiens OX=9606 GN=MTDH PE=4 SV=1	7	3	5	3	1	582	63.8	9.32	17.98	3	0	560859	5.10795e+06	817073	638984	1.4555e+06	1.56435e+06
A0A0X9V9B3	#N/A	MS-F1 light chain variable region (Fragment) OS=Homo sapiens OX=9606 PE=2 SV=1	18	2	5	2	1	112	12.1	5.96	17.97	2	0	5.2994e+06	4.54831e+06	9.55448e+06	5.3106e+06	625738	2.16166e+06
A5PL32	APOL1	APOL1 protein (Fragment) OS=Homo sapiens OX=9606 GN=APOL1 PE=2 SV=1	9	3	6	3	1	439	48.5	7.17	17.92	3	0	996624	3.12104e+06	2.11149e+06	3.78911e+06	898980	2.09764e+06
A0A0J9YX35	IGHV3-64D	Immunoglobulin heavy variable 3-64D OS=Homo sapiens OX=9606 GN=IGHV3-64D PE=3 SV=1	19	2	6	2	1	117	12.8	7.85	17.88	2	0	3.69698e+06	4.14364e+06	4.48357e+06	7652729	1.00863e+06	1.18321e+06
O00232	PSMD12	26S proteasome non-ATPase regulatory subunit 12 OS=Homo sapiens OX=9606 GN=PSMD12 PE=1 SV=3	9	3	6	3	1	456	52.9	7.65	17.86	3	0	465431	1.25259e+06	518700	900111	792479	1.81651e+06
P62330	ARF6	ADP-ribosylation factor 6 OS=Homo sapiens OX=9606 GN=ARF6 PE=1 SV=2	18	3	7	3	1	175	20.1	8.95	17.7	3	0	1.62175e+06	1.9548e+06	1.67883e+06	2.33253e+06	499455	1.64755e+06
Q5HYG7	DKFZp686M24262	Uncharacterized protein DKFZp686M24262 OS=Homo sapiens OX=9606 GN=DKFZp686M24262 PE=2 SV=1	12	5	8	5	1	454	50.3	7.8	17.65	5	0	2.60047e+06	7.21258e+06	1.92353e+06	4.59045e+06	6.02108e+06	2.47925e+06
P08559	PDHA1	Pyruvate dehydrogenase E1 component subunit alpha, somatic form, mitochondrial OS=Homo sapiens OX=9606 GN=PDHA1 PE=1 SV=3	19	6	7	6	1	390	43.3	8.06	17.62	6	0	672755	6.92537e+06	1.53898e+06	1.74774e+06	2.87783e+06	1.71655e+06
Q9Y2X3	NOP58	Nucleolar protein 58 OS=Homo sapiens OX=9606 GN=NOP58 PE=1 SV=1	5	2	6	2	1	529	59.5	8.92	17.6	2	0	926639	975864	NA	972544	NA	1.31447e+06
P60468	SEC61B	Protein transport protein Sec61 subunit beta OS=Homo sapiens OX=9606 GN=SEC61B PE=1 SV=2	22	2	7	2	1	96	10	11.56	17.58	2	0	4.81841e+06	1.27761e+07	8.7996e+06	7.89399e+06	4.055e+06	8.84627e+06
P61254	RPL26	60S ribosomal protein L26 OS=Homo sapiens OX=9606 GN=RPL26 PE=1 SV=1	23	3	7	3	1	145	17.2	10.55	17.54	3	0	967490	4.90354e+06	1.51599e+06	2.18145e+06	3.2581e+06	1.42e+06
B5BUB5	SSB	Autoantigen La (Fragment) OS=Homo sapiens OX=9606 GN=SSB PE=2 SV=1	12	4	6	4	1	408	46.8	7.12	17.51	4	0	424431	6.85955e+06	2.28185e+06	2.04373e+06	5.45807e+06	393650
P40199	CEACAM6	Carcinoembryonic antigen-related cell adhesion molecule 6 OS=Homo sapiens OX=9606 GN=CEACAM6 PE=1 SV=3	10	2	4	2	1	344	37.2	5.82	17.5	2	0	929215	NA	NA	NA	350114	NA
Q9H2G2	SLK	STE20-like serine/threonine-protein kinase OS=Homo sapiens OX=9606 GN=SLK PE=1 SV=1	3	3	6	2	1	1235	142.6	5.15	17.41	3	1	905858	1.32006e+06	1.4161e+06	2019164	1.1684e+06	699584
B2RBH2	#N/A	cDNA, FLJ95508, highly similar to Homo sapiens 5'-nucleotidase, ecto (CD73) (NT5E), mRNA OS=Homo sapiens OX=9606 PE=2 SV=1	5	2	5	2	1	574	63.4	7.03	17.41	2	0	NA	1.80889e+06	NA	783409	2.26626e+06	439255
A6NC98	CCDC88B	Coiled-coil domain-containing protein 88B OS=Homo sapiens OX=9606 GN=CCDC88B PE=1 SV=1	4	5	6	5	1	1476	164.7	5.11	17.33	5	0	1.23407e+06	NA	NA	491899	1.05929e+06	369353
A0A024RAJ8	IQGAP2	IQ motif containing GTPase activating protein 2, isoform CRA_b OS=Homo sapiens OX=9606 GN=IQGAP2 PE=4 SV=1	3	5	9	2	1	1575	180.5	5.58	17.3	5	0	NA	NA	NA	NA	414221	322244
Q70UQ0	IKBIP	Inhibitor of nuclear factor kappa-B kinase-interacting protein OS=Homo sapiens OX=9606 GN=IKBIP PE=1 SV=1	12	4	6	4	1	350	39.3	9.17	17.3	4	0	5.36166e+06	1.53567e+07	6.81943e+06	9182639	4.10141e+06	4.53172e+06
Q53EU7	#N/A	N-myc downstream regulated gene 1 variant (Fragment) OS=Homo sapiens OX=9606 PE=2 SV=1	8	2	5	2	1	394	42.8	5.82	17.28	2	0	NA	3.87853e+06	805633	2465605	991822	1.19488e+06
A8K4D5	KYNU	Kynureninase OS=Homo sapiens OX=9606 GN=KYNU PE=2 SV=1	9	3	6	3	1	465	52.3	7.03	17.26	3	0	2.36402e+06	387136	2.26176e+06	1.41586e+06	386649	1.46976e+06
Q53GL6	RALY	RNA binding protein (Autoantigenic, hnRNP-associated with lethal yellow) long isoform variant (Fragment) OS=Homo sapiens OX=9606 GN=RALY PE=1 SV=1	18	5	7	5	1	307	32.5	9.17	17.14	5	0	2.54383e+06	1.16652e+07	2.04288e+06	4476008	6.72152e+06	4.39842e+06
Q9Y3E8	#N/A	CGI-150 protein OS=Homo sapiens OX=9606 PE=2 SV=1	11	4	6	4	1	504	55	8.7	17.12	4	0	215186	2.64577e+06	1.5166e+06	NA	3.22975e+06	132558
Q9NPP4	NLRC4	NLR family CARD domain-containing protein 4 OS=Homo sapiens OX=9606 GN=NLRC4 PE=1 SV=2	3	2	6	2	1	1024	116.1	6.77	17.12	2	0	1.63281e+06	NA	60537.1	976797	NA	755787
Q6YHK3	CD109	CD109 antigen OS=Homo sapiens OX=9606 GN=CD109 PE=1 SV=2	5	4	6	4	1	1445	161.6	5.85	17.08	4	0	17946.9	1.84877e+06	95779.2	192413	456158	369978
Q9Y6E3	#N/A	HSPC027 OS=Homo sapiens OX=9606 PE=2 SV=1	8	3	6	3	1	377	42.6	6.07	17.05	3	0	3.11584e+06	7.77423e+06	2.56953e+06	3721303	4.58922e+06	5.24536e+06
Q13057	COASY	Bifunctional coenzyme A synthase OS=Homo sapiens OX=9606 GN=COASY PE=1 SV=4	9	4	7	4	1	564	62.3	6.99	17.05	4	0	179035	98126.6	56075.1	133873	109857	175211
Q8TDZ2	MICAL1	[F-actin]-monooxygenase MICAL1 OS=Homo sapiens OX=9606 GN=MICAL1 PE=1 SV=2	4	3	5	3	1	1067	117.8	6.4	16.97	3	0	2.88731e+06	1.05834e+06	1.03729e+06	1.71488e+06	1.5285e+06	1.68289e+06
A0A024R2M6	ACAA1	Acetyl-Coenzyme A acyltransferase 1 (Peroxisomal 3-oxoacyl-Coenzyme A thiolase), isoform CRA_a OS=Homo sapiens OX=9606 GN=ACAA1 PE=2 SV=1	11	3	6	3	1	424	44.3	8.44	16.95	3	0	253801	573412	526481	368848	496602	298242
A0A024R9B7	COX6C	Cytochrome c oxidase subunit VIc, isoform CRA_a OS=Homo sapiens OX=9606 GN=COX6C PE=2 SV=1	37	3	9	3	1	75	8.8	10.39	16.95	3	0	3.13119e+06	1.0939e+07	3.26568e+06	6.17746e+06	2.7775e+06	5.77709e+06
P29034	S100A2	Protein S100-A2 OS=Homo sapiens OX=9606 GN=S100A2 PE=1 SV=3	28	3	6	3	1	98	11.1	4.78	16.95	3	0	3.08353e+06	292317	903675	5.3466e+06	1.07834e+06	9.93438e+06
O95486	SEC24A	Protein transport protein Sec24A OS=Homo sapiens OX=9606 GN=SEC24A PE=1 SV=2	4	4	6	3	1	1093	119.7	7.66	16.86	4	1	362172	942821	239387	205653	1.81885e+07	5.49502e+06
B3KTJ9	#N/A	cDNA FLJ38393 fis, clone FEBRA2007212 OS=Homo sapiens OX=9606 PE=2 SV=1	5	4	6	4	1	923	102.9	5.22	16.82	4	0	306336	4.07001e+06	675161	1.82735e+06	1.13243e+06	779175
P62851	RPS25	40S ribosomal protein S25 OS=Homo sapiens OX=9606 GN=RPS25 PE=1 SV=1	15	2	7	2	1	125	13.7	10.11	16.76	2	0	5.89888e+06	2.86924e+07	9.14617e+06	1.52847e+07	1.50636e+07	1.22635e+07
Q8IVN8	SBSPON	Somatomedin-B and thrombospondin type-1 domain-containing protein OS=Homo sapiens OX=9606 GN=SBSPON PE=1 SV=2	16	3	6	3	1	264	29.6	7.5	16.68	3	0	NA	NA	NA	NA	1.28142e+07	6.86651e+06
A8K9K6	#N/A	cDNA FLJ76962, highly similar to Homo sapiens nucleolar protein 5A (56kDa with KKE/D repeat) (NOL5A), mRNA OS=Homo sapiens OX=9606 PE=2 SV=1	9	5	7	5	1	594	65.9	9.23	16.68	5	0	1.09569e+06	7.72353e+06	1.41084e+06	2.92515e+06	3.78192e+06	3.88131e+06
P12081	HARS	Histidine--tRNA ligase, cytoplasmic OS=Homo sapiens OX=9606 GN=HARS PE=1 SV=2	10	4	6	4	1	509	57.4	5.88	16.56	4	0	1.41974e+06	3.57217e+06	1.18268e+06	2.12096e+06	4.06724e+06	1.799e+06
Q86X55	CARM1	Histone-arginine methyltransferase CARM1 OS=Homo sapiens OX=9606 GN=CARM1 PE=1 SV=3	8	3	5	3	1	608	65.8	6.73	16.52	3	0	354911	1.91994e+06	668288	985206	NA	NA
A8K6A7	#N/A	Alpha-mannosidase OS=Homo sapiens OX=9606 PE=2 SV=1	4	3	4	3	1	1011	113.7	7.28	16.51	3	0	553585	2.63325e+06	543023	877751	2.03073e+06	NA
A0A024R745	NDUFA5	NADH dehydrogenase (Ubiquinone) 1 alpha subcomplex, 5, 13kDa, isoform CRA_b OS=Homo sapiens OX=9606 GN=NDUFA5 PE=4 SV=1	30	3	6	3	1	116	13.5	5.99	16.46	3	0	544030	5.30584e+06	527327	1.81363e+06	1.81495e+06	2.1685e+06
B3KUB8	#N/A	cDNA FLJ39539 fis, clone PUAEN2008228, highly similar to Platelet glycoprotein 4 OS=Homo sapiens OX=9606 PE=2 SV=1	4	2	6	2	1	472	53	7.96	16.39	2	0	803127	4.9113e+06	380670	2.6779e+06	1.50858e+07	1.3353e+07
P09467	FBP1	Fructose-1,6-bisphosphatase 1 OS=Homo sapiens OX=9606 GN=FBP1 PE=1 SV=5	10	2	6	2	1	338	36.8	6.99	16.36	2	0	25531.5	653313	205966	173696	654010	98695.2
Q14515	SPARCL1	SPARC-like protein 1 OS=Homo sapiens OX=9606 GN=SPARCL1 PE=1 SV=2	7	3	5	3	1	664	75.2	4.81	16.33	3	0	NA	877606	NA	880172	2.2219e+06	168138
Q13177	PAK2	Serine/threonine-protein kinase PAK 2 OS=Homo sapiens OX=9606 GN=PAK2 PE=1 SV=3	9	4	6	4	1	524	58	5.96	16.19	4	0	2.29791e+06	5.26959e+06	1.35202e+06	2.73133e+06	4.87975e+06	1.1933e+06
Q96PU8	QKI	Protein quaking OS=Homo sapiens OX=9606 GN=QKI PE=1 SV=1	9	2	5	2	1	341	37.6	8.56	16.08	2	0	225112	1.87642e+06	488365	1682784	2.08488e+06	1.55925e+06
Q53HB3	#N/A	Proteasome 26S ATPase subunit 1 variant (Fragment) OS=Homo sapiens OX=9606 PE=1 SV=1	8	3	6	2	1	440	49.2	6.21	15.96	3	0	1.89878e+06	6.38866e+06	2.01147e+06	4.02291e+06	6.57727e+06	2.45432e+06
A0A024RC78	SEC11L1	Signal peptidase complex catalytic subunit SEC11 OS=Homo sapiens OX=9606 GN=SEC11L1 PE=3 SV=1	12	2	7	2	1	179	20.6	9.48	15.92	2	0	1.33326e+06	2.36552e+06	1.07785e+06	1.69143e+06	1.81729e+06	5.44598e+06
Q9UKV3	ACIN1	Apoptotic chromatin condensation inducer in the nucleus OS=Homo sapiens OX=9606 GN=ACIN1 PE=1 SV=2	4	3	6	3	1	1341	151.8	6.43	15.9	3	0	246882	537622	97547.1	184754	NA	NA
A0A3B3IRV5	HEBP1	Heme-binding protein 1 (Fragment) OS=Homo sapiens OX=9606 GN=HEBP1 PE=4 SV=1	15	2	5	2	1	207	23.1	9.33	15.89	2	0	5.10835e+06	1.09758e+06	2.86404e+06	2.73821e+06	4.57366e+06	7.75323e+06
Q8WY22	BRI3BP	BRI3-binding protein OS=Homo sapiens OX=9606 GN=BRI3BP PE=1 SV=1	14	2	5	2	1	251	27.8	9.44	15.83	2	0	1.04179e+06	185813	169208	530255	331009	373644
A8KAH7	#N/A	cDNA FLJ75444, highly similar to Homo sapiens protein kinase, cAMP-dependent, regulatory, type II, alpha (PRKAR2A), mRNA OS=Homo sapiens OX=9606 PE=2 SV=1	9	3	5	3	1	404	45.5	5.07	15.8	3	0	472504	4.55247e+06	303207	382725	4.85579e+06	2.05735e+06
B2RAQ8	#N/A	cDNA, FLJ95058, highly similar to Homo sapiens carnitine palmitoyltransferase 1A (liver) (CPT1A),nuclear gene encoding mitochondrial protein, mRNA OS=Homo sapiens OX=9606 PE=2 SV=1	3	2	5	2	1	773	88.3	8.59	15.77	2	0	647352	641694	303235	1.23904e+06	NA	969416
P05089	ARG1	Arginase-1 OS=Homo sapiens OX=9606 GN=ARG1 PE=1 SV=2	13	3	5	3	1	322	34.7	7.21	15.75	3	0	708006	1.9776e+06	68635.3	538696	3.31817e+06	931264
B0AZQ4	#N/A	Structural maintenance of chromosomes protein OS=Homo sapiens OX=9606 PE=2 SV=1	6	5	6	5	1	1217	141.4	7.18	15.66	5	0	1.24117e+06	1.00809e+06	541907	1.34031e+06	2.48743e+06	450737
A8K2W7	#N/A	cDNA FLJ78119, highly similar to Homo sapiens G1 to S phase transition 1 (GSPT1), mRNA OS=Homo sapiens OX=9606 PE=2 SV=1	13	5	5	5	1	499	55.7	5.62	15.65	5	0	885328	4.87893e+06	1.2814e+06	1.82633e+06	984557	2.35003e+06
P13807	GYS1	Glycogen [starch] synthase, muscle OS=Homo sapiens OX=9606 GN=GYS1 PE=1 SV=2	4	2	5	2	1	737	83.7	6.18	15.58	2	0	166730	135792	NA	867039	280914	432897
J3KQJ1	SUMF2	Inactive C-alpha-formylglycine-generating enzyme 2 OS=Homo sapiens OX=9606 GN=SUMF2 PE=1 SV=1	12	3	6	3	1	320	35.9	9.19	15.57	3	0	19178	1.73337e+06	63041	106918	1.7755e+06	68684.8
D6RBW1	EIF4E	Eukaryotic translation initiation factor 4E OS=Homo sapiens OX=9606 GN=EIF4E PE=1 SV=1	7	2	6	2	1	245	28.5	8.12	15.54	2	0	563814	3.10983e+06	1.22934e+06	1.77843e+06	1.64944e+06	1.54969e+06
A0A0A0MT60	FKBP15	Peptidylprolyl isomerase (Fragment) OS=Homo sapiens OX=9606 GN=FKBP15 PE=1 SV=1	3	3	5	3	1	1244	136.2	5.21	15.53	3	0	2.496e+06	214303	54360.5	819426	2.04379e+06	1.99798e+06
P02776	PF4	Platelet factor 4 OS=Homo sapiens OX=9606 GN=PF4 PE=1 SV=2	37	4	5	4	1	101	10.8	8.62	15.52	4	0	NA	1.45594e+07	NA	758730	NA	NA
A0A024RAG0	ALPL	Alkaline phosphatase OS=Homo sapiens OX=9606 GN=ALPL PE=3 SV=1	5	2	5	2	1	524	57.3	6.67	15.51	2	0	2.8998e+06	405566	NA	1140127	4.37985e+06	2.55204e+06
Q8NBQ5	HSD17B11	Estradiol 17-beta-dehydrogenase 11 OS=Homo sapiens OX=9606 GN=HSD17B11 PE=1 SV=3	11	2	4	2	1	300	32.9	9.07	15.45	2	0	1.37082e+06	1.93477e+06	643545	1.87395e+06	1.32901e+06	1.09981e+06
Q53HB7	#N/A	Diablo isoform 1 variant (Fragment) OS=Homo sapiens OX=9606 PE=2 SV=1	9	2	5	2	1	239	27.1	6.4	15.44	2	0	1.12118e+06	2.78495e+06	NA	1.19326e+06	2.37347e+06	1.59314e+06
O43237	DYNC1LI2	Cytoplasmic dynein 1 light intermediate chain 2 OS=Homo sapiens OX=9606 GN=DYNC1LI2 PE=1 SV=1	12	4	5	4	1	492	54.1	6.38	15.43	4	0	NA	4.38615e+06	731955	511659	3.02522e+06	586856
A0A346JF56	FCGR2A	Fc gamma receptor RIIa3 splice variant OS=Homo sapiens OX=9606 GN=FCGR2A PE=2 SV=1	10	2	4	2	1	333	36.7	6.28	15.4	2	0	1.1004e+06	1.20645e+06	1.43033e+06	2.30548e+06	NA	959126
P08567	PLEK	Pleckstrin OS=Homo sapiens OX=9606 GN=PLEK PE=1 SV=3	17	3	4	3	1	350	40.1	8.28	15.28	3	0	483534	1.79508e+06	NA	485731	295421	137504
Q92835	INPP5D	Phosphatidylinositol 3,4,5-trisphosphate 5-phosphatase 1 OS=Homo sapiens OX=9606 GN=INPP5D PE=1 SV=2	6	5	5	5	1	1189	133.2	7.59	15.22	5	0	353019	165679	NA	1.4759e+06	455197	877014
P25786	PSMA1	Proteasome subunit alpha type-1 OS=Homo sapiens OX=9606 GN=PSMA1 PE=1 SV=1	13	3	6	3	1	263	29.5	6.61	15.19	3	0	3.67499e+06	8.14593e+06	2.53299e+06	3.92494e+06	8.99268e+06	910234
P62314	SNRPD1	Small nuclear ribonucleoprotein Sm D1 OS=Homo sapiens OX=9606 GN=SNRPD1 PE=1 SV=1	29	2	4	2	1	119	13.3	11.56	15.15	2	0	NA	8.08998e+06	880009	2.27423e+06	3.25538e+06	344317
Q9H0B8	CRISPLD2	Cysteine-rich secretory protein LCCL domain-containing 2 OS=Homo sapiens OX=9606 GN=CRISPLD2 PE=2 SV=1	5	2	5	2	1	497	55.9	8.02	15.09	2	0	1.48548e+06	1.27036e+06	849385	581538	6.1581e+06	2.00218e+06
B2R941	#N/A	cDNA, FLJ94198, highly similar to Homo sapiens carboxypeptidase A3 (mast cell) (CPA3), mRNA OS=Homo sapiens OX=9606 PE=2 SV=1	8	4	5	4	1	417	48.7	9	15.06	4	0	NA	4.5644e+06	NA	NA	33245948	2.86178e+06
Q13217	DNAJC3	DnaJ homolog subfamily C member 3 OS=Homo sapiens OX=9606 GN=DNAJC3 PE=1 SV=1	9	3	5	3	1	504	57.5	6.15	14.92	3	0	1.28814e+06	2.95131e+06	2.40479e+06	3.06304e+06	1.18278e+06	1.10273e+06
Q16630	CPSF6	Cleavage and polyadenylation specificity factor subunit 6 OS=Homo sapiens OX=9606 GN=CPSF6 PE=1 SV=2	8	3	4	3	1	551	59.2	7.15	14.89	3	0	2.42068e+06	1.969e+06	302525	552448	923506	NA
Q8WUP2	FBLIM1	Filamin-binding LIM protein 1 OS=Homo sapiens OX=9606 GN=FBLIM1 PE=1 SV=2	16	4	5	4	1	373	40.6	6.02	14.88	4	0	NA	3.49278e+06	424845	2.08113e+06	1.30867e+06	927012
O43493	TGOLN2	Trans-Golgi network integral membrane protein 2 OS=Homo sapiens OX=9606 GN=TGOLN2 PE=1 SV=3	6	2	5	2	1	479	51	5.73	14.88	2	0	580425	1.03256e+06	411777	357934	NA	767036
Q15717	ELAVL1	ELAV-like protein 1 OS=Homo sapiens OX=9606 GN=ELAVL1 PE=1 SV=2	22	5	5	5	1	326	36.1	9.17	14.83	5	0	2.24326e+06	1.33814e+07	2.43326e+06	4.09099e+06	6.76188e+06	2.42161e+06
P48507	GCLM	Glutamate--cysteine ligase regulatory subunit OS=Homo sapiens OX=9606 GN=GCLM PE=1 SV=1	10	2	5	2	1	274	30.7	6.02	14.81	2	0	NA	NA	890479	1.13315e+06	1.17111e+06	1.76149e+06
Q14444	CAPRIN1	Caprin-1 OS=Homo sapiens OX=9606 GN=CAPRIN1 PE=1 SV=2	7	4	5	4	1	709	78.3	5.25	14.79	4	0	NA	1.0413e+07	NA	267167	699478	407419
Q02543	RPL18A	60S ribosomal protein L18a OS=Homo sapiens OX=9606 GN=RPL18A PE=1 SV=2	23	4	6	4	1	176	20.7	10.71	14.78	4	0	1.82203e+06	1.40834e+07	439657	2.45555e+06	NA	1.9809e+06
P50402	EMD	Emerin OS=Homo sapiens OX=9606 GN=EMD PE=1 SV=1	14	3	6	3	1	254	29	5.5	14.76	3	0	557992	3.29423e+06	651458	1.8166e+06	5.26444e+06	2.4361e+06
Q07021	C1QBP	Complement component 1 Q subcomponent-binding protein, mitochondrial OS=Homo sapiens OX=9606 GN=C1QBP PE=1 SV=1	19	2	4	2	1	282	31.3	4.84	14.75	2	0	NA	877815	NA	NA	NA	NA
P27487	DPP4	Dipeptidyl peptidase 4 OS=Homo sapiens OX=9606 GN=DPP4 PE=1 SV=2	7	4	5	4	1	766	88.2	6.04	14.7	4	0	5.03744e+06	1.12789e+06	6.30731e+06	11566379	1.88297e+07	1.68704e+07
B2RD14	#N/A	Ubiquitin carboxyl-terminal hydrolase OS=Homo sapiens OX=9606 PE=2 SV=1	26	3	4	3	1	223	24.8	5.48	14.68	3	0	421945	3.33913e+06	731552	NA	1.7219e+06	406031
B2R5I8	#N/A	cDNA, FLJ92490, highly similar to Homo sapiens RAB32, member RAS oncogene family (RAB32), mRNA OS=Homo sapiens OX=9606 PE=2 SV=1	18	4	5	4	1	225	24.9	6.68	14.68	4	0	1.19656e+06	NA	1.57592e+06	902315	NA	NA
P25787	PSMA2	Proteasome subunit alpha type-2 OS=Homo sapiens OX=9606 GN=PSMA2 PE=1 SV=2	24	3	4	3	1	234	25.9	7.43	14.56	3	0	133690	1.30262e+06	NA	423732	511572	NA
A0A0S2Z5J4	AP3B1	Adaptor-related protein complex 3 beta 1 subunit isoform 1 (Fragment) OS=Homo sapiens OX=9606 GN=AP3B1 PE=2 SV=1	3	3	5	3	1	1094	121.2	6.04	14.49	3	0	672559	2.12336e+06	343292	968006	NA	490089
A0A384P5L2	#N/A	Epididymis secretory sperm binding protein OS=Homo sapiens OX=9606 PE=2 SV=1	16	3	4	3	1	329	35.2	8.44	14.48	3	0	435223	2.03639e+06	765162	858614	2.49932e+06	883541
A0A2U8J8K9	IgH	Ig heavy chain variable region (Fragment) OS=Homo sapiens OX=9606 GN=IgH PE=2 SV=1	22	2	5	2	1	102	11.4	7.97	14.4	2	0	874170	1.88375e+06	8.14159e+06	5.09584e+06	682388	NA
A8K492	#N/A	cDNA FLJ76789, highly similar to Homo sapiens methionine-tRNA synthetase (MARS), mRNA OS=Homo sapiens OX=9606 PE=2 SV=1	7	4	5	4	1	900	101.1	6.16	14.38	4	0	234697	1.22917e+06	370650	792010	1.06413e+06	657318
Q92542	NCSTN	Nicastrin OS=Homo sapiens OX=9606 GN=NCSTN PE=1 SV=2	3	2	6	2	1	709	78.4	5.99	14.34	2	0	966541	686963	100646	802455	802361	260449
D6RAX7	COPS4	COP9 constitutive photomorphogenic-like protein subunit 4 isoform 2 OS=Homo sapiens OX=9606 GN=COPS4 PE=1 SV=1	6	2	5	2	1	420	47.7	6.43	14.32	2	0	672142	2.04968e+06	1.01091e+06	1.60852e+06	2.79605e+06	2.14381e+06
B0BCY7	ENPEP	Aminopeptidase OS=Homo sapiens OX=9606 GN=ENPEP PE=2 SV=1	4	3	5	3	1	957	109.2	5.47	14.31	3	0	NA	747982	NA	424322	178111	146126
A8K878	MANF	Mesencephalic astrocyte-derived neurotrophic factor OS=Homo sapiens OX=9606 GN=MANF PE=1 SV=1	21	3	5	3	1	185	21.1	8.92	14.29	3	0	1.79387e+06	5.65382e+06	2.22299e+06	2.99314e+06	4.30145e+06	3.19178e+06
A0A024R8L1	WBP2	WW domain binding protein 2, isoform CRA_a OS=Homo sapiens OX=9606 GN=WBP2 PE=4 SV=1	9	2	5	2	1	261	28.1	5.91	14.27	2	0	4.05356e+06	1.47615e+06	531725	1.78878e+06	NA	636342
A8K8N7	PFAS	Phosphoribosylformylglycinamidine synthase (FGAR amidotransferase), isoform CRA_b OS=Homo sapiens OX=9606 GN=PFAS PE=2 SV=1	3	2	5	2	1	1338	144.6	5.76	14.26	2	0	NA	403231	NA	772638	757060	NA
V9HW01	HEL-S-310	Epididymis secretory protein Li 310 OS=Homo sapiens OX=9606 GN=HEL-S-310 PE=2 SV=1	13	2	6	2	1	157	17.8	11.25	14.24	2	0	1.79204e+06	1.37531e+07	3.11745e+06	6.02088e+06	5.5274e+06	5.80184e+06
A0A024RAC5	RCC2	Epididymis secretory sperm binding protein OS=Homo sapiens OX=9606 GN=RCC2 PE=2 SV=1	12	4	4	4	1	522	56	8.78	14.19	4	0	452631	3.91144e+06	431505	1.65189e+06	1.09504e+06	1.21841e+06
A0A024R240	GNAQ	Epididymis secretory sperm binding protein OS=Homo sapiens OX=9606 GN=GNAQ PE=2 SV=1	11	3	5	3	1	359	42.1	5.68	14.16	3	0	727915	1.17747e+06	403880	1.09968e+06	879178	753730
A8K2X4	#N/A	cDNA FLJ75401, highly similar to Homo sapiens endoglin (Osler-Rendu-Weber syndrome 1), mRNA OS=Homo sapiens OX=9606 PE=2 SV=1	3	2	5	2	1	658	70.5	6.61	14.04	2	0	950673	3.98391e+06	1.03135e+06	3.40181e+06	673663	2.12009e+06
P45973	CBX5	Chromobox protein homolog 5 OS=Homo sapiens OX=9606 GN=CBX5 PE=1 SV=1	11	2	4	2	1	191	22.2	5.86	13.94	2	0	NA	3.25141e+06	597973	451105	1.9418e+06	212028
A8K3B6	#N/A	Tyrosine-protein kinase OS=Homo sapiens OX=9606 PE=2 SV=1	8	3	6	3	1	450	50.7	7.06	13.91	3	0	1.83956e+06	2.25834e+06	1.85605e+06	2.61471e+06	2.18293e+06	1.24347e+06
B2R4A2	#N/A	Cytochrome b-c1 complex subunit 7 OS=Homo sapiens OX=9606 PE=2 SV=1	34	3	5	3	1	111	13.5	8.27	13.88	3	0	1.34095e+06	2.54316e+06	874786	1.8483e+06	1.90082e+06	2.23646e+06
Q9BTT0	ANP32E	Acidic leucine-rich nuclear phosphoprotein 32 family member E OS=Homo sapiens OX=9606 GN=ANP32E PE=1 SV=1	10	2	4	2	1	268	30.7	3.85	13.88	2	0	1.67265e+06	3.02113e+06	749488	1.82933e+06	3.90112e+06	928519
Q16270	IGFBP7	Insulin-like growth factor-binding protein 7 OS=Homo sapiens OX=9606 GN=IGFBP7 PE=1 SV=1	22	4	6	4	1	282	29.1	7.9	13.85	4	0	112012	4.29757e+06	NA	1.19824e+06	3.78779e+06	371313
A0A024R6W2	NUDT21	Nudix (Nucleoside diphosphate linked moiety X)-type motif 21, isoform CRA_a OS=Homo sapiens OX=9606 GN=NUDT21 PE=4 SV=1	21	4	5	4	1	227	26.2	8.82	13.78	4	0	3.00538e+06	9.33351e+06	2.41583e+06	3.6913e+06	5.27535e+06	3.69762e+06
O14828	SCAMP3	Secretory carrier-associated membrane protein 3 OS=Homo sapiens OX=9606 GN=SCAMP3 PE=1 SV=3	8	2	4	2	1	347	38.3	7.64	13.75	2	0	568025	868393	337716	496642	456497	NA
Q96M27	PRRC1	Protein PRRC1 OS=Homo sapiens OX=9606 GN=PRRC1 PE=1 SV=1	9	3	4	3	1	445	46.7	5.83	13.73	3	0	976355	201548	1.27746e+06	1.5967e+06	1.44733e+06	852527
B2RAH5	#N/A	cDNA, FLJ94919, highly similar to Homo sapiens protein phosphatase 1, regulatory (inhibitor) subunit 12A (PPP1R12A), mRNA OS=Homo sapiens OX=9606 PE=2 SV=1	3	3	5	3	1	1030	115.3	5.43	13.69	3	0	2.24473e+06	3.59236e+06	715564	1.78724e+06	2.95076e+06	1.18677e+06
Q14157	UBAP2L	Ubiquitin-associated protein 2-like OS=Homo sapiens OX=9606 GN=UBAP2L PE=1 SV=2	5	4	4	4	1	1087	114.5	7.11	13.67	4	0	NA	1.32551e+06	370537	53125.6	3.26806e+06	621284
P16885	PLCG2	1-phosphatidylinositol 4,5-bisphosphate phosphodiesterase gamma-2 OS=Homo sapiens OX=9606 GN=PLCG2 PE=1 SV=4	2	2	7	2	1	1265	147.8	6.64	13.66	2	0	1.28683e+06	109054	373685	1.35743e+06	921224	395833
Q13435	SF3B2	Splicing factor 3B subunit 2 OS=Homo sapiens OX=9606 GN=SF3B2 PE=1 SV=2	4	2	4	2	1	895	100.2	5.67	13.6	2	0	643974	2.36118e+06	983375	1.125e+06	1.91126e+06	696437
A8K769	#N/A	Secretory carrier-associated membrane protein OS=Homo sapiens OX=9606 PE=2 SV=1	10	2	4	2	1	329	36.6	6.1	13.56	2	0	3.50618e+06	2.05612e+07	3.28724e+06	3976862	5.73675e+06	4.13227e+06
A0A024R0E2	CSDE1	Cold shock domain containing E1, RNA-binding, isoform CRA_a OS=Homo sapiens OX=9606 GN=CSDE1 PE=4 SV=1	3	2	4	2	1	798	88.8	6.25	13.46	2	0	244971	664022	176502	204355	700668	585325
Q13442	PDAP1	28 kDa heat- and acid-stable phosphoprotein OS=Homo sapiens OX=9606 GN=PDAP1 PE=1 SV=1	16	2	4	2	1	181	20.6	8.87	13.42	2	0	NA	NA	NA	NA	NA	NA
B4DS14	#N/A	cDNA FLJ55519, highly similar to Kinesin light chain 1 OS=Homo sapiens OX=9606 PE=2 SV=1	6	3	4	3	1	732	83.7	7.33	13.34	3	0	309189	1.41781e+06	257387	284965	1.20707e+06	312179
Q5U0B9	#N/A	Stem cell growth factor; lymphocyte secreted C-type lectin OS=Homo sapiens OX=9606 PE=2 SV=1	11	3	5	3	1	323	35.6	5.16	13.32	3	0	114875	4.84897e+06	NA	NA	3.03333e+06	2.67463e+06
A0A0A0MSG2	FHL2	Four and a half LIM domains protein 2 OS=Homo sapiens OX=9606 GN=FHL2 PE=1 SV=1	11	3	4	3	1	395	44.8	8.06	13.25	3	0	108992	2.11832e+06	255889	NA	3.87637e+06	714345
Q9UHB9	SRP68	Signal recognition particle subunit SRP68 OS=Homo sapiens OX=9606 GN=SRP68 PE=1 SV=2	7	3	4	3	1	627	70.7	8.56	13.24	3	0	280299	2.39328e+06	1.0023e+06	762301	1.99403e+06	753642
P53597	SUCLG1	Succinate--CoA ligase [ADP/GDP-forming] subunit alpha, mitochondrial OS=Homo sapiens OX=9606 GN=SUCLG1 PE=1 SV=4	7	2	5	2	1	346	36.2	8.79	13.23	2	0	1.22463e+06	7.33272e+06	6.95245e+06	5.49545e+06	6.76756e+06	6.38464e+06
Q969X5	ERGIC1	Endoplasmic reticulum-Golgi intermediate compartment protein 1 OS=Homo sapiens OX=9606 GN=ERGIC1 PE=1 SV=1	18	4	6	4	1	290	32.6	7.06	13.22	4	0	NA	2.14779e+06	132924	962688	2.18673e+06	2.08083e+06
O00429	DNM1L	Dynamin-1-like protein OS=Homo sapiens OX=9606 GN=DNM1L PE=1 SV=2	4	3	5	3	1	736	81.8	6.81	13.16	3	0	501306	1.01173e+06	1.10045e+06	1.14412e+06	NA	1.40157e+06
A0A024R6Q1	EIF5	Eukaryotic translation initiation factor 5, isoform CRA_b OS=Homo sapiens OX=9606 GN=EIF5 PE=4 SV=1	6	2	5	2	1	431	49.2	5.58	13.15	2	0	218996	1.84712e+06	461752	550080	1.56578e+06	800413
Q13201	MMRN1	Multimerin-1 OS=Homo sapiens OX=9606 GN=MMRN1 PE=1 SV=3	3	3	4	3	1	1228	138	7.93	13.11	3	0	NA	800870	NA	1.00431e+06	157106	4.46964e+06
A0A024RBB5	CSRP2	Cysteine and glycine-rich protein 2, isoform CRA_a OS=Homo sapiens OX=9606 GN=CSRP2 PE=2 SV=1	26	3	5	3	1	193	20.9	8.62	13.1	3	0	NA	5.67173e+06	518348	1.03322e+06	4.16032e+06	1.13745e+06
K7EM18	EIF1	Eukaryotic translation initiation factor 1 OS=Homo sapiens OX=9606 GN=EIF1 PE=1 SV=1	36	2	3	2	1	121	13.6	7.9	13.01	2	0	NA	123014	13367.8	23131.4	287520	NA
Q59EH3	#N/A	Acid phosphatase 1 isoform c variant (Fragment) OS=Homo sapiens OX=9606 PE=2 SV=1	15	2	4	2	1	165	18.7	7.88	12.93	2	0	1.27931e+06	2.25636e+06	1.72268e+06	1.83896e+06	3.21998e+06	2.2866e+06
Q7Z5R6	APBB1IP	Amyloid beta A4 precursor protein-binding family B member 1-interacting protein OS=Homo sapiens OX=9606 GN=APBB1IP PE=1 SV=1	4	3	6	3	1	666	73.1	5.59	12.93	3	0	4.97545e+06	1.06996e+06	2.27739e+06	2.78488e+06	2.71195e+06	1.67868e+06
A0A024R7N1	GMIP	GEM interacting protein, isoform CRA_b OS=Homo sapiens OX=9606 GN=GMIP PE=4 SV=1	3	2	4	2	1	970	106.6	5.72	12.93	2	0	190051	72339.7	NA	186013	314233	282688
O00461	GOLIM4	Golgi integral membrane protein 4 OS=Homo sapiens OX=9606 GN=GOLIM4 PE=1 SV=1	6	3	4	3	1	696	81.8	4.77	12.91	3	0	NA	1.88332e+06	187333	494064	741646	170112
P15169	CPN1	Carboxypeptidase N catalytic chain OS=Homo sapiens OX=9606 GN=CPN1 PE=1 SV=1	4	2	5	2	1	458	52.3	7.34	12.88	2	0	598267	590772	472370	990113	NA	666247
P20061	TCN1	Transcobalamin-1 OS=Homo sapiens OX=9606 GN=TCN1 PE=1 SV=2	14	3	4	3	1	433	48.2	5.03	12.81	3	0	1.46087e+06	357168	NA	NA	NA	144864
Q9BRF8	CPPED1	Serine/threonine-protein phosphatase CPPED1 OS=Homo sapiens OX=9606 GN=CPPED1 PE=1 SV=3	18	3	4	3	1	314	35.5	6.2	12.8	3	0	2.29319e+06	NA	961368	866512	3.89774e+06	1.26277e+06
Q13425	SNTB2	Beta-2-syntrophin OS=Homo sapiens OX=9606 GN=SNTB2 PE=1 SV=1	8	4	5	4	1	540	57.9	8.82	12.56	4	0	NA	2.13876e+06	NA	439290	1.19584e+06	609810
Q08722	CD47	Leukocyte surface antigen CD47 OS=Homo sapiens OX=9606 GN=CD47 PE=1 SV=1	5	2	5	2	1	323	35.2	7.21	12.55	2	0	7.61919e+06	4.73141e+06	3.09818e+06	7.10856e+06	5.25309e+06	7.83865e+06
A8KAP3	#N/A	cDNA FLJ78483, highly similar to Homo sapiens elongation factor Tu GTP binding domain containing 2 (EFTUD2), mRNA OS=Homo sapiens OX=9606 PE=2 SV=1	4	3	5	2	1	972	109.4	5.01	12.46	3	0	NA	1.04045e+06	NA	NA	750146	NA
J3KPQ4	ARHGAP9	Rho GTPase activating protein 9, isoform CRA_a OS=Homo sapiens OX=9606 GN=ARHGAP9 PE=1 SV=1	4	2	4	2	1	821	90.5	7.93	12.44	2	0	191219	NA	68242.9	194773	147139	181497
H0YHG0	#N/A	Uncharacterized protein (Fragment) OS=Homo sapiens OX=9606 PE=1 SV=1	7	3	4	3	1	523	59.1	8.59	12.38	3	0	1.28145e+06	3.15749e+06	303741	787229	1.87337e+06	281672
P31153	MAT2A	S-adenosylmethionine synthase isoform type-2 OS=Homo sapiens OX=9606 GN=MAT2A PE=1 SV=1	10	3	5	3	1	395	43.6	6.48	12.36	3	0	668956	4.22635e+06	1.00642e+06	1110158	2.93353e+06	921166
A0A384NQ03	#N/A	Epididymis secretory sperm binding protein OS=Homo sapiens OX=9606 PE=2 SV=1	6	3	6	3	1	530	59.3	10.1	12.3	3	0	354176	3.14813e+06	279793	879325	1.21382e+06	663007
A0A0U5KKF1	HLA-DQB1	MHC class II antigen OS=Homo sapiens OX=9606 GN=HLA-DQB1 PE=3 SV=1	19	4	5	3	1	261	29.9	7.56	12.29	4	1	271090	1.06604e+06	5.94373e+06	3.18777e+06	3.76022e+06	805277
Q9BV40	VAMP8	Vesicle-associated membrane protein 8 OS=Homo sapiens OX=9606 GN=VAMP8 PE=1 SV=1	24	2	4	2	1	100	11.4	7.34	12.21	2	0	1.14522e+07	2.52195e+06	1.53591e+06	5.72898e+06	1.53867e+06	3.58772e+06
B2RB57	#N/A	cDNA, FLJ95321, highly similar to Homo sapiens ATG7 autophagy related 7 homolog (S. cerevisiae) (ATG7), mRNA OS=Homo sapiens OX=9606 PE=2 SV=1	8	3	4	3	1	703	77.9	6.24	12.18	3	0	595171	227557	234907	420966	NA	NA
O00217	NDUFS8	NADH dehydrogenase [ubiquinone] iron-sulfur protein 8, mitochondrial OS=Homo sapiens OX=9606 GN=NDUFS8 PE=1 SV=1	10	2	5	2	1	210	23.7	6.34	12.14	2	0	97439.5	1.39531e+06	144174	308030	744624	352579
B1AP13	CD55	Complement decay-accelerating factor OS=Homo sapiens OX=9606 GN=CD55 PE=1 SV=1	8	3	4	3	1	444	49.3	8.82	12.06	3	0	2.53963e+06	1.04663e+06	849119	1430485	1.27164e+07	5.5443e+06
P01714	IGLV3-19	Immunoglobulin lambda variable 3-19 OS=Homo sapiens OX=9606 GN=IGLV3-19 PE=1 SV=2	44	3	5	3	1	112	12	4.96	12.06	3	0	338575	746214	2.54982e+06	1.60555e+06	320186	1.02942e+06
A0A1B0W1E4	COX2	Cytochrome c oxidase subunit 2 (Fragment) OS=Homo sapiens OX=9606 GN=COX2 PE=3 SV=1	13	2	5	2	1	228	25.7	4.82	11.95	2	0	2.99021e+06	1.13571e+07	1.34018e+06	5.11406e+06	2.71625e+06	1.6229e+06
A0A2U8J8J4	IgH	Ig heavy chain variable region (Fragment) OS=Homo sapiens OX=9606 GN=IgH PE=2 SV=1	24	2	4	2	1	102	11.2	7.08	11.88	2	0	2.49399e+06	3.60318e+06	1.15903e+07	6.87011e+06	NA	NA
P09497	CLTB	Clathrin light chain B OS=Homo sapiens OX=9606 GN=CLTB PE=1 SV=1	8	2	5	2	1	229	25.2	4.64	11.86	2	0	1.62879e+06	NA	NA	NA	NA	NA
Q5TEJ8	THEMIS2	Protein THEMIS2 OS=Homo sapiens OX=9606 GN=THEMIS2 PE=1 SV=1	6	3	4	3	1	643	72	6.1	11.81	3	0	846661	45781.1	852562	154547	555143	1.00942e+06
B7Z6Q5	#N/A	Beta-galactosidase OS=Homo sapiens OX=9606 PE=2 SV=1	3	2	4	2	1	725	81.8	7.94	11.76	2	0	675583	2.73727e+06	536299	922796	230983	186366
P49721	PSMB2	Proteasome subunit beta type-2 OS=Homo sapiens OX=9606 GN=PSMB2 PE=1 SV=1	21	4	5	4	1	201	22.8	7.02	11.74	4	0	4.89668e+06	8.45495e+06	2.54651e+06	3.58291e+06	4.45482e+06	4.68561e+06
P51970	NDUFA8	NADH dehydrogenase [ubiquinone] 1 alpha subcomplex subunit 8 OS=Homo sapiens OX=9606 GN=NDUFA8 PE=1 SV=3	15	3	5	3	1	172	20.1	7.65	11.72	3	0	834496	2.1626e+06	615192	1.06384e+06	1.66756e+06	1.28649e+06
P13073	COX4I1	Cytochrome c oxidase subunit 4 isoform 1, mitochondrial OS=Homo sapiens OX=9606 GN=COX4I1 PE=1 SV=1	11	2	4	2	1	169	19.6	9.51	11.7	2	0	1.91421e+06	6.83835e+06	1.39337e+06	4.4361e+06	688541	1.63718e+06
A0A384MDL3	#N/A	Epididymis secretory sperm binding protein OS=Homo sapiens OX=9606 PE=2 SV=1	29	2	4	2	1	161	17.9	6.1	11.69	2	0	857402	2.20207e+06	871811	1.60421e+06	2.93508e+06	2.19943e+06
A0A024RA98	PADI2	Peptidyl arginine deiminase, type II, isoform CRA_a OS=Homo sapiens OX=9606 GN=PADI2 PE=4 SV=1	3	2	4	2	1	665	75.5	5.59	11.62	2	0	2.61946e+06	177681	1.6095e+06	1.56189e+06	1.68833e+06	1.75103e+06
B3KQK4	#N/A	cDNA FLJ90619 fis, clone PLACE1002374, highly similar to Cathepsin L OS=Homo sapiens OX=9606 PE=2 SV=1	11	2	4	2	1	333	37.5	5.45	11.58	2	0	NA	NA	585418	NA	1.81914e+06	NA
A8K3I0	#N/A	cDNA FLJ78437, highly similar to Homo sapiens cartilage oligomeric matrix protein (COMP), mRNA OS=Homo sapiens OX=9606 PE=2 SV=1	7	3	4	3	1	757	82.8	4.59	11.55	3	0	417332	1.15137e+06	1.53633e+06	766247	3.05977e+06	1.90842e+06
E7ESC6	XPO7	Exportin-7 OS=Homo sapiens OX=9606 GN=XPO7 PE=1 SV=1	2	2	4	2	1	1088	124	6.48	11.54	2	0	536684	1.71751e+06	NA	1.35848e+06	1.1791e+06	1.00179e+06
P49756	RBM25	RNA-binding protein 25 OS=Homo sapiens OX=9606 GN=RBM25 PE=1 SV=3	4	2	3	2	1	843	100.1	6.32	11.51	2	0	NA	727553	230822	NA	385793	NA
P05543	SERPINA7	Thyroxine-binding globulin OS=Homo sapiens OX=9606 GN=SERPINA7 PE=1 SV=2	5	2	5	2	1	415	46.3	6.3	11.48	2	0	1.39034e+06	1.32887e+06	1.94809e+06	2.28896e+06	1.42981e+06	1.03062e+06
Q9NUJ1	ABHD10	Mycophenolic acid acyl-glucuronide esterase, mitochondrial OS=Homo sapiens OX=9606 GN=ABHD10 PE=1 SV=1	15	3	4	3	1	306	33.9	8.57	11.47	3	0	NA	1.25692e+06	NA	468284	857651	NA
Q59EU3	#N/A	Dematin variant (Fragment) OS=Homo sapiens OX=9606 PE=4 SV=1	4	2	4	2	1	518	56.8	9.74	11.47	2	0	2.44614e+06	4.98049e+06	NA	2.37524e+06	306302	1.7651e+06
A0A140VJZ1	#N/A	Ubiquitin carboxyl-terminal hydrolase OS=Homo sapiens OX=9606 PE=2 SV=1	6	3	4	3	1	858	95.7	5.03	11.45	3	0	2.04076e+06	1.83298e+06	145307	1.5524e+06	4.04311e+06	3.37531e+06
P07738	BPGM	Bisphosphoglycerate mutase OS=Homo sapiens OX=9606 GN=BPGM PE=1 SV=2	8	2	6	2	1	259	30	6.54	11.28	2	0	959682	1.39815e+06	302334	735033	860163	2.34841e+06
P47929	LGALS7	Galectin-7 OS=Homo sapiens OX=9606 GN=LGALS7 PE=1 SV=2	22	2	4	2	1	136	15.1	7.62	11.22	2	0	259044	NA	NA	2.92335e+06	1.55904e+06	1.69118e+07
Q8IUI8	CRLF3	Cytokine receptor-like factor 3 OS=Homo sapiens OX=9606 GN=CRLF3 PE=1 SV=2	8	3	4	3	1	442	49.7	5.14	11.19	3	0	3.48504e+06	NA	1.1195e+06	1.41615e+06	436833	1.3839e+06
F8W727	RPL32	60S ribosomal protein L32 OS=Homo sapiens OX=9606 GN=RPL32 PE=1 SV=1	21	3	4	3	1	153	18	10.59	11.18	3	0	114712	2.2374e+07	1.87654e+06	4.87687e+06	2.29641e+06	264171
O43765	SGTA	Small glutamine-rich tetratricopeptide repeat-containing protein alpha OS=Homo sapiens OX=9606 GN=SGTA PE=1 SV=1	11	3	4	3	1	313	34	4.87	11.15	3	0	1.79452e+08	1.79475e+08	7.31053e+07	1.36059e+08	1.38905e+08	1.105e+08
Q9BX97	PLVAP	Plasmalemma vesicle-associated protein OS=Homo sapiens OX=9606 GN=PLVAP PE=2 SV=1	9	4	4	4	1	442	50.6	8.79	11.15	4	0	1.22546e+06	5.17831e+06	742032	1.96731e+06	2.819e+06	1.3312e+06
Q15046	KARS	Lysine--tRNA ligase OS=Homo sapiens OX=9606 GN=KARS PE=1 SV=3	6	3	4	3	1	597	68	6.35	11.09	3	0	1.81298e+08	1.97749e+07	2.31026e+08	5.48073e+07	2.0771e+06	3.20006e+07
Q86Y82	STX12	Syntaxin-12 OS=Homo sapiens OX=9606 GN=STX12 PE=1 SV=1	16	3	3	3	1	276	31.6	5.59	11.07	3	0	327067	2.00689e+06	NA	1.21128e+06	4.55594e+06	190932
Q92538	GBF1	Golgi-specific brefeldin A-resistance guanine nucleotide exchange factor 1 OS=Homo sapiens OX=9606 GN=GBF1 PE=1 SV=2	2	3	4	3	1	1859	206.3	5.73	11.06	3	0	70090.6	490748	174651	NA	NA	NA
Q9UHV9	PFDN2	Prefoldin subunit 2 OS=Homo sapiens OX=9606 GN=PFDN2 PE=1 SV=1	14	2	4	2	1	154	16.6	6.58	11.04	2	0	2.05732e+06	3.2551e+06	1.50406e+06	1.91187e+06	4.41532e+06	2.19784e+06
B2R6X2	#N/A	Beta-glucuronidase OS=Homo sapiens OX=9606 PE=2 SV=1	3	2	6	2	1	651	74.7	7.02	10.98	2	0	3.30289e+06	1.82612e+06	553542	1.5691e+06	3.43477e+06	1.43484e+06
Q5HYE3	DKFZp686H1812	Uncharacterized protein DKFZp686H1812 OS=Homo sapiens OX=9606 GN=DKFZp686H1812 PE=2 SV=1	11	4	4	4	1	402	45.9	7.91	10.97	4	0	NA	3.71481e+06	47727.4	481605	1.44911e+07	2.73403e+06
Q9UHG3	PCYOX1	Prenylcysteine oxidase 1 OS=Homo sapiens OX=9606 GN=PCYOX1 PE=1 SV=3	5	2	5	2	1	505	56.6	6.18	10.96	2	0	1.46835e+06	2.95156e+06	2.11985e+06	2.5555e+06	2.09555e+06	1.91604e+06
A0A024RBA9	RAB21	RAB21, member RAS oncogene family, isoform CRA_a OS=Homo sapiens OX=9606 GN=RAB21 PE=4 SV=1	10	2	4	2	1	225	24.3	7.94	10.9	2	0	2.19819e+06	1.35727e+06	1.58571e+06	1.76569e+06	2.65916e+06	2.47816e+06
Q86VS8	HOOK3	Protein Hook homolog 3 OS=Homo sapiens OX=9606 GN=HOOK3 PE=1 SV=2	7	4	4	4	1	718	83.1	5.17	10.89	4	0	646250	1.9471e+06	153366	560389	1.55525e+06	284794
Q96K17	BTF3L4	Transcription factor BTF3 homolog 4 OS=Homo sapiens OX=9606 GN=BTF3L4 PE=1 SV=1	23	2	4	2	1	158	17.3	6.35	10.85	2	0	NA	2.82851e+06	564704	586160	1.91835e+06	1.20708e+06
E9PI68	SPCS2	Signal peptidase complex subunit 2 OS=Homo sapiens OX=9606 GN=SPCS2 PE=1 SV=1	11	3	5	3	1	257	28.5	8.79	10.76	3	0	1.44212e+06	5.6473e+06	1.39366e+06	2.09316e+06	1.14991e+06	1.50368e+06
B2R4D8	#N/A	60S ribosomal protein L27 OS=Homo sapiens OX=9606 PE=2 SV=1	30	3	4	3	1	136	15.8	10.56	10.76	3	0	765784	8.89777e+06	527784	1.41691e+06	1.70373e+06	NA
B2RCM2	#N/A	cDNA, FLJ96156, highly similar to Homo sapiens leucyl-tRNA synthetase (LARS), mRNA OS=Homo sapiens OX=9606 PE=2 SV=1	3	3	4	3	1	1176	134.4	7.2	10.75	3	0	453372	1.98869e+06	339554	1.14212e+06	930270	753355
A0A024R7J0	PRKACA	Protein kinase, cAMP-dependent, catalytic, alpha, isoform CRA_c OS=Homo sapiens OX=9606 GN=PRKACA PE=3 SV=1	6	2	4	2	1	351	40.6	8.79	10.63	2	0	1.89036e+06	4.62624e+06	1.28078e+06	2.72825e+06	2.73564e+06	2.9239e+06
A0A2R8YDT1	GLUL	Glutamine synthetase OS=Homo sapiens OX=9606 GN=GLUL PE=1 SV=1	9	3	4	3	1	507	57.1	8.37	10.62	3	0	645279	1.14039e+06	164847	118898	2.01809e+06	2.63589e+06
B2R6P3	#N/A	cDNA, FLJ93047, highly similar to Homo sapiens matrix metallopeptidase 14 (membrane-inserted) (MMP14), mRNA OS=Homo sapiens OX=9606 PE=2 SV=1	6	3	4	3	1	582	65.8	7.77	10.57	3	0	621162	4.91777e+06	1.16816e+06	1.92444e+06	4.5575e+06	2.57332e+06
J3KNQ4	PARVA	Alpha-parvin OS=Homo sapiens OX=9606 GN=PARVA PE=1 SV=1	8	3	3	3	1	412	46.6	8.4	10.54	3	0	NA	2.92429e+06	NA	796433	NA	NA
A0A024RDS1	HSPH1	Heat shock 105kDa/110kDa protein 1, isoform CRA_c OS=Homo sapiens OX=9606 GN=HSPH1 PE=3 SV=1	5	3	3	2	1	858	96.8	5.39	10.52	3	0	NA	635449	NA	NA	NA	256311
Q9UJZ1	STOML2	Stomatin-like protein 2, mitochondrial OS=Homo sapiens OX=9606 GN=STOML2 PE=1 SV=1	11	2	3	2	1	356	38.5	7.39	10.51	2	0	NA	836650	NA	NA	956212	359901
Q8TDJ5	TFG/ALK	Tyrosine-protein kinase receptor OS=Homo sapiens OX=9606 GN=TFG/ALK fusion PE=2 SV=1	5	3	4	3	1	803	88.6	6.33	10.49	3	0	625158	4.74963e+06	431155	956617	3.56123e+06	366588
Q9Y639	NPTN	Neuroplastin OS=Homo sapiens OX=9606 GN=NPTN PE=1 SV=2	8	2	3	2	1	398	44.4	7.99	10.46	2	0	69967.5	1.7901e+06	583605	1.37638e+06	2.98197e+06	3.3878e+06
Q96P48	ARAP1	Arf-GAP with Rho-GAP domain, ANK repeat and PH domain-containing protein 1 OS=Homo sapiens OX=9606 GN=ARAP1 PE=1 SV=3	3	3	4	3	1	1450	162.1	6.23	10.41	3	0	305138	124679	253687	327248	1.86421e+06	800027
Q00688	FKBP3	Peptidyl-prolyl cis-trans isomerase FKBP3 OS=Homo sapiens OX=9606 GN=FKBP3 PE=1 SV=1	10	2	4	2	1	224	25.2	9.28	10.33	2	0	858798	5.93646e+06	1.26512e+06	1.45373e+06	2.50638e+06	1.12927e+06
A0A024RBE7	TMPO	Thymopoietin, isoform CRA_c OS=Homo sapiens OX=9606 GN=TMPO PE=4 SV=1	6	2	3	2	1	454	50.6	9.38	10.31	2	0	NA	1.68871e+06	163489	742847	NA	205238
P46109	CRKL	Crk-like protein OS=Homo sapiens OX=9606 GN=CRKL PE=1 SV=1	10	2	4	2	1	303	33.8	6.74	10.29	2	0	321517	507464	351531	460590	639026	455985
Q8IVL6	P3H3	Prolyl 3-hydroxylase 3 OS=Homo sapiens OX=9606 GN=P3H3 PE=1 SV=1	6	3	3	3	1	736	81.8	6.32	10.23	3	0	175362	703980	698083	375492	NA	173335
Q96FQ6	S100A16	Protein S100-A16 OS=Homo sapiens OX=9606 GN=S100A16 PE=1 SV=1	39	3	3	3	1	103	11.8	6.79	10.23	3	0	6.56628e+06	1.12629e+07	1.91541e+07	2.3665e+07	5.60511e+07	2.20277e+07
A8K3M9	#N/A	cDNA FLJ76387, highly similar to Homo sapiens splicing factor, arginine/serine-rich 9 (SFRS9), mRNA OS=Homo sapiens OX=9606 PE=2 SV=1	10	2	4	2	1	221	25.5	8.65	10.19	2	0	NA	3.06225e+06	120600	1.23302e+06	2.77974e+06	2.3268e+06
Q8IX19	MCEMP1	Mast cell-expressed membrane protein 1 OS=Homo sapiens OX=9606 GN=MCEMP1 PE=1 SV=1	11	2	4	2	1	187	21.2	8.87	10.17	2	0	7.9332e+06	NA	1.87851e+06	5149816	1.52254e+06	3.59367e+06
Q9UH65	SWAP70	Switch-associated protein 70 OS=Homo sapiens OX=9606 GN=SWAP70 PE=1 SV=1	6	2	3	2	1	585	69	5.87	10.16	2	0	811139	1.34441e+06	708200	NA	2.13709e+06	714635
O94826	TOMM70	Mitochondrial import receptor subunit TOM70 OS=Homo sapiens OX=9606 GN=TOMM70 PE=1 SV=1	5	3	4	3	1	608	67.4	7.12	10.1	3	0	786703	2.04659e+06	698199	1.57184e+06	1.37355e+06	984369
P61956	SUMO2	Small ubiquitin-related modifier 2 OS=Homo sapiens OX=9606 GN=SUMO2 PE=1 SV=3	27	2	3	2	1	95	10.9	5.5	10.07	2	0	728118	1.68887e+07	NA	680020	1.06566e+06	346937
A8K329	#N/A	cDNA FLJ76656, highly similar to Homo sapiens scaffold attachment factor B (SAFB), mRNA OS=Homo sapiens OX=9606 PE=2 SV=1	4	3	4	3	1	916	102.7	5.44	10.07	3	0	NA	1.85617e+06	259940	387072	614204	331143
Q8NE86	MCU	Calcium uniporter protein, mitochondrial OS=Homo sapiens OX=9606 GN=MCU PE=1 SV=1	8	2	3	2	1	351	39.8	8.65	10.01	2	0	284873	430081	171641	556214	365313	NA
Q9H8L6	MMRN2	Multimerin-2 OS=Homo sapiens OX=9606 GN=MMRN2 PE=1 SV=2	5	3	3	3	1	949	104.3	5.86	9.99	3	0	NA	2.94101e+06	NA	1.49462e+06	2.30283e+06	1.13015e+06
Q05519	SRSF11	Serine/arginine-rich splicing factor 11 OS=Homo sapiens OX=9606 GN=SRSF11 PE=1 SV=1	10	3	4	3	1	484	53.5	10.52	9.98	3	0	595799	1.62099e+06	383125	806973	1.21847e+06	374550
Q5U5J2	CSNK2A1	CSNK2A1 protein OS=Homo sapiens OX=9606 GN=CSNK2A1 PE=1 SV=1	7	2	3	2	1	397	45.9	7.96	9.96	2	0	1.03052e+06	1.45662e+06	310668	888785	NA	1.05046e+06
Q4G0F5	VPS26B	Vacuolar protein sorting-associated protein 26B OS=Homo sapiens OX=9606 GN=VPS26B PE=1 SV=2	7	2	4	2	1	336	39.1	7.36	9.9	2	0	1.02579e+06	575259	729349	611662	1.22857e+06	575496
Q14789	GOLGB1	Golgin subfamily B member 1 OS=Homo sapiens OX=9606 GN=GOLGB1 PE=1 SV=2	1	3	3	3	1	3259	375.8	5	9.85	3	0	NA	625281	NA	NA	NA	NA
Q9Y5S9	RBM8A	RNA-binding protein 8A OS=Homo sapiens OX=9606 GN=RBM8A PE=1 SV=1	17	2	3	2	1	174	19.9	5.72	9.85	2	0	284777	1.03941e+06	NA	542877	NA	NA
E9PF49	NDUFB9	NADH dehydrogenase [ubiquinone] 1 beta subcomplex subunit 9 OS=Homo sapiens OX=9606 GN=NDUFB9 PE=1 SV=1	8	2	4	2	1	221	26.6	8.87	9.81	2	0	1.10661e+07	1.6595e+07	1.23501e+07	1.49586e+07	2.20987e+07	1.33959e+07
Q12904	AIMP1	Aminoacyl tRNA synthase complex-interacting multifunctional protein 1 OS=Homo sapiens OX=9606 GN=AIMP1 PE=1 SV=2	14	3	3	3	1	312	34.3	8.43	9.81	3	0	NA	3.76108e+06	NA	NA	1.64997e+06	NA
O60832	DKC1	H/ACA ribonucleoprotein complex subunit DKC1 OS=Homo sapiens OX=9606 GN=DKC1 PE=1 SV=3	6	2	3	2	1	514	57.6	9.42	9.79	2	0	470296	3.22813e+06	520922	616814	1.9271e+06	1.01844e+06
O95831	AIFM1	Apoptosis-inducing factor 1, mitochondrial OS=Homo sapiens OX=9606 GN=AIFM1 PE=1 SV=1	8	3	3	3	1	613	66.9	8.95	9.76	3	0	574284	2.70793e+06	540791	915674	1.42134e+06	NA
A0A024R3D8	DLAT	Acetyltransferase component of pyruvate dehydrogenase complex OS=Homo sapiens OX=9606 GN=DLAT PE=3 SV=1	8	4	5	4	1	647	68.9	7.84	9.76	4	0	810823	4.80036e+06	327248	1.51898e+06	3.67003e+06	1.72524e+06
P31151	S100A7	Protein S100-A7 OS=Homo sapiens OX=9606 GN=S100A7 PE=1 SV=4	25	2	3	2	1	101	11.5	6.77	9.73	2	0	NA	NA	NA	NA	434366	961627
O14672	ADAM10	Disintegrin and metalloproteinase domain-containing protein 10 OS=Homo sapiens OX=9606 GN=ADAM10 PE=1 SV=1	4	3	4	3	1	748	84.1	7.77	9.73	3	0	3.25069e+06	1.55673e+06	1.15772e+06	1.6105e+06	2.48647e+06	2.60914e+06
A0A2U8J8Z8	IgH	Ig heavy chain variable region (Fragment) OS=Homo sapiens OX=9606 GN=IgH PE=2 SV=1	31	2	3	2	1	98	10.9	6.57	9.71	2	0	5.5696e+07	1.84409e+06	1.07892e+08	30615400	NA	4.11372e+07
O75832	PSMD10	26S proteasome non-ATPase regulatory subunit 10 OS=Homo sapiens OX=9606 GN=PSMD10 PE=1 SV=1	15	2	3	2	1	226	24.4	6.1	9.69	2	0	NA	874083	571279	2.20404e+06	1.08702e+06	383422
O43236	43712	Septin-4 OS=Homo sapiens OX=9606 GN=SEPT4 PE=1 SV=1	5	2	4	2	1	478	55.1	6.11	9.67	2	0	137908	964715	116262	857349	NA	NA
A0A087WW40	SH3GLB1	Endophilin-B1 OS=Homo sapiens OX=9606 GN=SH3GLB1 PE=1 SV=1	11	3	3	3	1	394	44.2	6.44	9.66	3	0	35249.7	3.41986e+06	932390	1211825	NA	459007
E5RJR5	SKP1	S-phase kinase-associated protein 1 OS=Homo sapiens OX=9606 GN=SKP1 PE=1 SV=1	19	3	3	3	1	163	18.7	4.7	9.65	3	0	570213	1.97236e+06	538359	1.57803e+06	946417	577890
P50238	CRIP1	Cysteine-rich protein 1 OS=Homo sapiens OX=9606 GN=CRIP1 PE=1 SV=3	49	3	5	3	1	77	8.5	8.75	9.6	3	0	379291	7.90699e+06	3.5551e+06	987912	2.53314e+06	NA
G5E977	NAPRT	Nicotinate phosphoribosyltransferase domain containing 1, isoform CRA_d OS=Homo sapiens OX=9606 GN=NAPRT PE=1 SV=1	6	3	3	3	1	584	62.1	6.73	9.58	3	0	3.41291e+06	1.18291e+06	715634	2.1401e+06	1.94288e+06	1.39356e+06
A0A384MTI8	DCPS	Decapping enzyme, scavenger OS=Homo sapiens OX=9606 GN=DCPS PE=2 SV=1	11	2	3	2	1	337	38.6	6.38	9.57	2	0	79885.8	148704	24559.7	68871.3	338725	75765.9
P27708	CAD	CAD protein OS=Homo sapiens OX=9606 GN=CAD PE=1 SV=3	2	3	4	3	1	2225	242.8	6.46	9.57	3	0	865439	2.60594e+06	590675	1.12511e+06	832587	1.35216e+06
Q8N766	EMC1	ER membrane protein complex subunit 1 OS=Homo sapiens OX=9606 GN=EMC1 PE=1 SV=1	3	2	3	2	1	993	111.7	7.66	9.56	2	0	NA	1.22939e+06	NA	190684	NA	451474
P20591	MX1	Interferon-induced GTP-binding protein Mx1 OS=Homo sapiens OX=9606 GN=MX1 PE=1 SV=4	4	2	3	2	1	662	75.5	5.83	9.51	2	0	NA	411696	54021.8	494357	NA	NA
P27482	CALML3	Calmodulin-like protein 3 OS=Homo sapiens OX=9606 GN=CALML3 PE=1 SV=2	23	3	3	2	1	149	16.9	4.42	9.51	3	0	NA	NA	NA	NA	NA	959534
A0A0S2Z4C6	PPP3CA	Serine/threonine-protein phosphatase (Fragment) OS=Homo sapiens OX=9606 GN=PPP3CA PE=2 SV=1	7	3	4	3	1	521	58.7	5.86	9.46	3	0	1.55839e+06	2.86006e+06	1.08426e+06	1.27415e+06	NA	1.17496e+06
A0A024R071	NUP155	Nucleoporin 155kDa, isoform CRA_a OS=Homo sapiens OX=9606 GN=NUP155 PE=4 SV=1	2	2	3	2	1	1391	155.1	6.16	9.38	2	0	NA	NA	NA	NA	NA	NA
O95445	APOM	Apolipoprotein M OS=Homo sapiens OX=9606 GN=APOM PE=1 SV=2	8	2	5	2	1	188	21.2	6.01	9.38	2	0	4.81708e+06	6.19299e+06	5.46324e+06	5.70288e+06	444638	1.30489e+06
B2RBP7	#N/A	cDNA, FLJ95623, highly similar to Homo sapiens differentially expressed in FDCP 6 homolog (mouse) (DEF6), mRNA OS=Homo sapiens OX=9606 PE=2 SV=1	4	2	3	2	1	631	73.9	5.88	9.36	2	0	1.21756e+06	165408	492891	531811	745153	750697
J3KQ32	OLA1	Obg-like ATPase 1 OS=Homo sapiens OX=9606 GN=OLA1 PE=1 SV=1	5	2	4	2	1	416	46.9	8.06	9.36	2	0	2.26426e+06	4.58325e+06	NA	2.69088e+06	2.58574e+06	2.62177e+06
Q9UHX1	PUF60	Poly(U)-binding-splicing factor PUF60 OS=Homo sapiens OX=9606 GN=PUF60 PE=1 SV=1	9	3	4	3	1	559	59.8	5.29	9.35	3	0	318089	2.16008e+06	566367	1.46434e+06	2.5006e+06	627041
Q5TDH0	DDI2	Protein DDI1 homolog 2 OS=Homo sapiens OX=9606 GN=DDI2 PE=1 SV=1	11	2	3	2	1	399	44.5	5.05	9.34	2	0	640555	1.04949e+06	NA	888134	1.22528e+06	687430
B2RD27	#N/A	cDNA, FLJ96428, highly similar to Homo sapiens proteasome (prosome, macropain) 26S subunit, non-ATPase, 7 (Mov34 homolog) (PSMD7), mRNA OS=Homo sapiens OX=9606 PE=2 SV=1	13	3	3	3	1	324	37	6.77	9.31	3	0	NA	4.08193e+06	53398.4	1.54682e+06	1.81108e+06	1.44281e+06
Q8WUM0	NUP133	Nuclear pore complex protein Nup133 OS=Homo sapiens OX=9606 GN=NUP133 PE=1 SV=2	3	2	3	2	1	1156	128.9	5.1	9.29	2	0	85847.2	265039	NA	129509	242518	NA
P23229	ITGA6	Integrin alpha-6 OS=Homo sapiens OX=9606 GN=ITGA6 PE=1 SV=5	3	3	4	3	1	1130	126.5	6.61	9.26	3	0	NA	672369	NA	478329	882890	576337
Q15008	PSMD6	26S proteasome non-ATPase regulatory subunit 6 OS=Homo sapiens OX=9606 GN=PSMD6 PE=1 SV=1	11	3	3	3	1	389	45.5	5.62	9.24	3	0	635992	2.80603e+06	1.1479e+06	1.30188e+06	960672	324469
P29373	CRABP2	Cellular retinoic acid-binding protein 2 OS=Homo sapiens OX=9606 GN=CRABP2 PE=1 SV=2	28	3	3	3	1	138	15.7	5.4	9.17	3	0	NA	5.965e+06	501031	NA	774525	NA
Q5SSJ5	HP1BP3	Heterochromatin protein 1-binding protein 3 OS=Homo sapiens OX=9606 GN=HP1BP3 PE=1 SV=1	5	2	3	2	1	553	61.2	9.67	9.17	2	0	609844	2.72978e+06	NA	509615	190278	NA
P21730	C5AR1	C5a anaphylatoxin chemotactic receptor 1 OS=Homo sapiens OX=9606 GN=C5AR1 PE=1 SV=2	6	2	3	2	1	350	39.3	9.01	9.15	2	0	6.09775e+06	1.45779e+06	3.07943e+06	2636853	3.83301e+06	2.0401e+06
B3KWI4	#N/A	cDNA FLJ43122 fis, clone CTONG3003737, highly similar to Leucine-rich repeat-containing protein 15 OS=Homo sapiens OX=9606 PE=2 SV=1	5	2	3	2	1	581	64.4	6.71	9.13	2	0	NA	2.97222e+06	900550	669852	NA	NA
Q14571	ITPR2	Inositol 1,4,5-trisphosphate receptor type 2 OS=Homo sapiens OX=9606 GN=ITPR2 PE=1 SV=2	1	2	4	2	1	2701	307.9	6.43	9.02	2	0	3.06274e+06	NA	1.45966e+06	1677813	1.13899e+06	1.01381e+06
M0QXB5	ETHE1	Persulfide dioxygenase ETHE1, mitochondrial OS=Homo sapiens OX=9606 GN=ETHE1 PE=1 SV=1	14	3	3	3	1	260	28.4	6.52	9	3	0	1.45399e+06	5.53322e+06	1.17269e+06	5.08098e+06	3.77537e+06	NA
A8K1X9	#N/A	cDNA FLJ77679, highly similar to Homo sapiens potassium voltage-gated channel, shaker-related subfamily, beta member 2 (KCNAB2), transcript variant 1, mRNA OS=Homo sapiens OX=9606 PE=2 SV=1	11	2	2	2	1	367	41	9	8.98	2	0	244919	130698	111579	272211	281958	188859
Q969V3	NCLN	Nicalin OS=Homo sapiens OX=9606 GN=NCLN PE=1 SV=2	5	2	3	2	1	563	62.9	6.89	8.97	2	0	NA	496139	45009.1	341283	205321	342082
Q14258	TRIM25	E3 ubiquitin/ISG15 ligase TRIM25 OS=Homo sapiens OX=9606 GN=TRIM25 PE=1 SV=2	7	3	3	3	1	630	70.9	8.09	8.96	3	0	340906	NA	942717	532214	659239	484624
P19623	SRM	Spermidine synthase OS=Homo sapiens OX=9606 GN=SRM PE=1 SV=1	18	3	3	3	1	302	33.8	5.49	8.95	3	0	230415	854766	327586	335117	686352	NA
A0A2R8YD14	RPS24	40S ribosomal protein S24 OS=Homo sapiens OX=9606 GN=RPS24 PE=1 SV=1	16	2	3	2	1	165	19.2	10.98	8.93	2	0	NA	1.68657e+06	450634	779021	675086	755931
P10301	RRAS	Ras-related protein R-Ras OS=Homo sapiens OX=9606 GN=RRAS PE=1 SV=1	12	2	3	2	1	218	23.5	6.93	8.91	2	0	NA	1.747e+06	NA	1.29641e+06	1.39289e+06	491615
A0A0U1RRM6	ENAH	Protein enabled homolog OS=Homo sapiens OX=9606 GN=ENAH PE=1 SV=1	3	2	3	2	1	802	87.3	7.77	8.9	2	0	100390	1.36877e+06	333765	NA	NA	NA
A0A024QYX3	RBM3	RNA binding motif (RNP1, RRM) protein 3, isoform CRA_c OS=Homo sapiens OX=9606 GN=RBM3 PE=4 SV=1	18	2	3	2	1	157	17.2	8.91	8.86	2	0	375409	4.72179e+06	NA	NA	NA	NA
A0A087WU53	MAGT1	Magnesium transporter protein 1 OS=Homo sapiens OX=9606 GN=MAGT1 PE=1 SV=1	6	2	3	2	1	367	41.5	9.94	8.84	2	0	479248	NA	285434	898838	651519	868051
Q16769	QPCT	Glutaminyl-peptide cyclotransferase OS=Homo sapiens OX=9606 GN=QPCT PE=1 SV=1	9	3	3	3	1	361	40.9	6.61	8.84	3	0	1.46855e+06	NA	481378	258976	NA	NA
B4E320	#N/A	cDNA FLJ50065, highly similar to MAM domain-containing protein 2 OS=Homo sapiens OX=9606 PE=2 SV=1	3	2	3	2	1	686	77.5	5.08	8.83	2	0	437777	NA	1.94221e+06	599818	3.34446e+06	3.95125e+06
P48960	CD97	CD97 antigen OS=Homo sapiens OX=9606 GN=CD97 PE=1 SV=4	4	3	3	3	1	835	91.8	6.87	8.79	3	0	2.67056e+06	1.84019e+06	773041	2.89066e+06	2.39911e+06	1.85479e+06
B7Z5A5	#N/A	cDNA FLJ61332, highly similar to Rho-GTPase-activating protein 25 OS=Homo sapiens OX=9606 PE=2 SV=1	4	2	3	2	1	591	66.7	6.18	8.76	2	0	1.0594e+06	247023	592192	1.01051e+06	827964	NA
A2N2F4	VK3	VK3 protein (Fragment) OS=Homo sapiens OX=9606 GN=VK3 PE=2 SV=1	23	2	3	2	1	108	11.9	9.51	8.75	2	0	368063	333802	6.25732e+06	4.36123e+06	227852	NA
G3V1L9	TJP1	Tight junction protein 1 (Zona occludens 1), isoform CRA_a OS=Homo sapiens OX=9606 GN=TJP1 PE=1 SV=1	2	3	3	3	1	1768	197.3	6.67	8.72	3	0	135626	1.4676e+06	78625.4	566536	1.72936e+06	745974
Q5H9Q6	DKFZp781N0678	Inosine-5'-monophosphate dehydrogenase OS=Homo sapiens OX=9606 GN=DKFZp781N0678 PE=2 SV=1	4	2	3	2	1	599	64.5	8.03	8.66	2	0	1.79751e+06	464405	984552	2.11573e+06	831075	1.41256e+06
Q9NS69	TOMM22	Mitochondrial import receptor subunit TOM22 homolog OS=Homo sapiens OX=9606 GN=TOMM22 PE=1 SV=3	16	2	3	2	1	142	15.5	4.34	8.65	2	0	NA	377717	NA	173457	187157	127965
Q6P2Q9	PRPF8	Pre-mRNA-processing-splicing factor 8 OS=Homo sapiens OX=9606 GN=PRPF8 PE=1 SV=2	2	3	3	3	1	2335	273.4	8.84	8.59	3	0	NA	804385	NA	NA	NA	NA
A0A1B1CYC5	Gc	Vitamin D binding protein (Fragment) OS=Homo sapiens OX=9606 GN=Gc PE=4 SV=1	38	2	3	2	1	34	3.7	8.56	8.58	2	0	NA	NA	NA	NA	1.22904e+07	1.14479e+07
Q6IAA8	LAMTOR1	Ragulator complex protein LAMTOR1 OS=Homo sapiens OX=9606 GN=LAMTOR1 PE=1 SV=2	16	2	3	2	1	161	17.7	5.15	8.57	2	0	895823	1.95855e+06	1.12383e+06	1.8635e+06	1.5277e+06	NA
Q59HE3	#N/A	Calpastatin isoform a variant (Fragment) OS=Homo sapiens OX=9606 PE=2 SV=1	7	3	3	3	1	784	84.2	5.35	8.55	3	0	536792	327625	142817	167492	352571	466704
C9JEJ2	PCYT1A	Choline-phosphate cytidylyltransferase A OS=Homo sapiens OX=9606 GN=PCYT1A PE=1 SV=1	7	2	3	2	1	380	43.2	8.5	8.54	2	0	305924	1.69939e+06	433521	495182	436971	385827
Q99567	NUP88	Nuclear pore complex protein Nup88 OS=Homo sapiens OX=9606 GN=NUP88 PE=1 SV=2	4	2	3	2	1	741	83.5	5.69	8.53	2	0	266293	548459	476190	301919	314665	462250
Q9UFN0	NIPSNAP3A	Protein NipSnap homolog 3A OS=Homo sapiens OX=9606 GN=NIPSNAP3A PE=1 SV=2	10	2	3	2	1	247	28.4	9.16	8.47	2	0	699177	979759	NA	530056	514941	718035
A5YKK6	CNOT1	CCR4-NOT transcription complex subunit 1 OS=Homo sapiens OX=9606 GN=CNOT1 PE=1 SV=2	1	2	4	2	1	2376	266.8	7.11	8.42	2	0	29953	132256	31017.9	60971.1	NA	NA
P26196	DDX6	Probable ATP-dependent RNA helicase DDX6 OS=Homo sapiens OX=9606 GN=DDX6 PE=1 SV=2	6	2	3	2	1	483	54.4	8.66	8.4	2	0	NA	1.47141e+06	528515	908270	632961	638275
Q59EN5	#N/A	Prosaposin variant (Fragment) OS=Homo sapiens OX=9606 PE=2 SV=1	5	3	4	3	1	530	58.7	5.1	8.37	3	0	7.68291e+06	4.33974e+06	4119020	3.73514e+06	3.7786e+06	3.563e+06
A0A0A0MTJ9	NCEH1	Neutral cholesterol ester hydrolase 1 OS=Homo sapiens OX=9606 GN=NCEH1 PE=1 SV=1	6	2	3	2	1	448	49.9	7.21	8.36	2	0	24731.2	1.23062e+06	289131	323297	162570	325951
Q5QGZ9	CLEC12A	C-type lectin domain family 12 member A OS=Homo sapiens OX=9606 GN=CLEC12A PE=1 SV=3	9	2	3	2	1	265	30.7	8.6	8.33	2	0	671648	NA	240265	455378	NA	221113
B4DWA5	#N/A	cDNA FLJ52464, highly similar to GTPase, IMAP family member 4 OS=Homo sapiens OX=9606 PE=2 SV=1	6	2	3	2	1	343	39	8.1	8.31	2	0	587989	1.7172e+06	432679	884806	2.52924e+06	1.02565e+06
B2R806	EIF3E	Eukaryotic translation initiation factor 3 subunit E OS=Homo sapiens OX=9606 GN=EIF3E PE=2 SV=1	5	2	3	2	1	445	52.2	6.04	8.27	2	0	692771	2.20654e+06	598994	920833	655464	NA
Q5T1J5	CHCHD2P9	Putative coiled-coil-helix-coiled-coil-helix domain-containing protein CHCHD2P9, mitochondrial OS=Homo sapiens OX=9606 GN=CHCHD2P9 PE=5 SV=1	27	2	2	2	1	151	15.5	9.89	8.23	2	0	565536	5.5178e+06	815029	850513	759847	NA
A6XNE2	#N/A	Complement factor D preproprotein OS=Homo sapiens OX=9606 PE=2 SV=1	17	3	3	3	1	260	27.8	7.25	8.23	3	0	1.11819e+06	932239	1.05054e+06	1.23519e+06	1.71733e+06	1.70355e+06
A0A0X9USL5	#N/A	MS-D2 light chain variable region (Fragment) OS=Homo sapiens OX=9606 PE=2 SV=1	34	2	3	2	1	107	11.4	7.96	8.22	2	0	2.36591e+06	2.17884e+06	1.16971e+06	674968	NA	356197
A0A1B0GW77	ALDH7A1	Alpha-aminoadipic semialdehyde dehydrogenase OS=Homo sapiens OX=9606 GN=ALDH7A1 PE=1 SV=1	7	3	3	3	1	554	60	8.18	8.2	3	0	913397	1.15584e+06	444326	773298	653463	1.66207e+06
Q5HYM3	DKFZp686C0249	Oxysterol-binding protein OS=Homo sapiens OX=9606 GN=DKFZp686C0249 PE=2 SV=1	3	3	5	3	1	890	101.2	7.06	8.14	3	0	436019	809097	887544	1.12214e+06	798809	997281
Q5VU08	ADD3	Adducin 3 (Gamma), isoform CRA_a OS=Homo sapiens OX=9606 GN=ADD3 PE=2 SV=1	5	3	3	3	1	706	79.1	6.32	8.13	3	0	1.53596e+06	2.40945e+06	363961	695878	656124	NA
O14727	APAF1	Apoptotic protease-activating factor 1 OS=Homo sapiens OX=9606 GN=APAF1 PE=1 SV=2	2	2	3	2	1	1248	141.7	6.4	8.06	2	0	847099	NA	1.30846e+06	610795	NA	485852
D6W5Y5	CIRBP	Cold inducible RNA binding protein, isoform CRA_c OS=Homo sapiens OX=9606 GN=CIRBP PE=1 SV=1	4	2	3	2	1	297	31.9	9.61	8.04	2	0	NA	1.76736e+06	325724	NA	2.35034e+06	244163
O43491	EPB41L2	Band 4.1-like protein 2 OS=Homo sapiens OX=9606 GN=EPB41L2 PE=1 SV=1	4	3	3	3	1	1005	112.5	5.44	8.03	3	0	NA	2.61429e+06	92940.3	306189	1.01407e+06	NA
Q9Y6C9	MTCH2	Mitochondrial carrier homolog 2 OS=Homo sapiens OX=9606 GN=MTCH2 PE=1 SV=1	7	2	3	2	1	303	33.3	7.97	8.02	2	0	760741	3.02746e+06	931773	1.87942e+06	1.64388e+06	1.36257e+06
Q6YN16	HSDL2	Hydroxysteroid dehydrogenase-like protein 2 OS=Homo sapiens OX=9606 GN=HSDL2 PE=1 SV=1	8	2	2	2	1	418	45.4	7.99	8.02	2	0	NA	NA	NA	NA	NA	NA
Q6IAT9	PSMB6	Proteasome subunit beta OS=Homo sapiens OX=9606 GN=PSMB6 PE=2 SV=1	9	2	3	2	1	239	25.3	4.92	7.99	2	0	441341	2.22455e+06	176905	NA	NA	NA
Q9NR30	DDX21	Nucleolar RNA helicase 2 OS=Homo sapiens OX=9606 GN=DDX21 PE=1 SV=5	4	2	2	2	1	783	87.3	9.28	7.89	2	0	NA	580121	NA	33737.8	62159.1	NA
P56199	ITGA1	Integrin alpha-1 OS=Homo sapiens OX=9606 GN=ITGA1 PE=1 SV=2	2	2	3	2	1	1179	130.8	6.29	7.87	2	0	458731	1.58763e+06	252174	830926	1.8601e+06	466681
Q13630	TSTA3	GDP-L-fucose synthase OS=Homo sapiens OX=9606 GN=TSTA3 PE=1 SV=1	6	2	4	2	1	321	35.9	6.6	7.83	2	0	1.5096e+06	3.40828e+06	1.2269e+06	2211087	2.92784e+06	2.33659e+06
A0A024R1U2	PHF5A	PHD finger protein 5A, isoform CRA_a OS=Homo sapiens OX=9606 GN=PHF5A PE=4 SV=1	26	3	3	3	1	110	12.4	8.41	7.81	3	0	NA	2.34178e+06	297324	642612	455301	349059
Q15052	ARHGEF6	Rho guanine nucleotide exchange factor 6 OS=Homo sapiens OX=9606 GN=ARHGEF6 PE=1 SV=2	4	2	2	2	1	776	87.4	6.05	7.78	2	0	332743	653561	NA	500489	1.11059e+06	299627
Q53HG1	#N/A	NADH dehydrogenase [ubiquinone] 1 alpha subcomplex subunit 12 (Fragment) OS=Homo sapiens OX=9606 PE=2 SV=1	18	2	3	2	1	146	17.2	9.63	7.76	2	0	NA	1.23186e+06	NA	169163	NA	NA
A1X283	SH3PXD2B	SH3 and PX domain-containing protein 2B OS=Homo sapiens OX=9606 GN=SH3PXD2B PE=1 SV=3	5	3	3	3	1	911	101.5	8.69	7.71	3	0	NA	899346	NA	369581	1.96859e+06	600786
Q9P2R3	ANKFY1	Rabankyrin-5 OS=Homo sapiens OX=9606 GN=ANKFY1 PE=1 SV=2	3	2	2	2	1	1169	128.3	6.1	7.71	2	0	271785	656615	NA	675152	451277	492980
Q9NTX5	ECHDC1	Ethylmalonyl-CoA decarboxylase OS=Homo sapiens OX=9606 GN=ECHDC1 PE=1 SV=2	7	2	3	2	1	307	33.7	8.21	7.68	2	0	436336	1.19956e+06	309766	397721	2.4596e+06	366354
P61964	WDR5	WD repeat-containing protein 5 OS=Homo sapiens OX=9606 GN=WDR5 PE=1 SV=1	8	2	3	2	1	334	36.6	8.27	7.66	2	0	721962	592849	328703	466096	685745	524909
I1VE18	SEC22B	SEC22 vesicle trafficking protein B (Fragment) OS=Homo sapiens OX=9606 GN=SEC22B PE=4 SV=1	38	2	2	2	1	53	6.1	4.94	7.65	2	0	NA	1.22345e+06	529593	668108	2.59489e+06	NA
E7ESZ7	NDUFA10	NADH dehydrogenase [ubiquinone] 1 alpha subcomplex subunit 10, mitochondrial OS=Homo sapiens OX=9606 GN=NDUFA10 PE=1 SV=1	5	2	3	2	1	390	44.7	8.34	7.6	2	0	786241	3.07779e+06	NA	1.12515e+06	1.40139e+06	1.7794e+06
V9GYM8	ARHGEF2	Rho guanine nucleotide exchange factor 2 OS=Homo sapiens OX=9606 GN=ARHGEF2 PE=1 SV=1	3	3	3	3	1	1031	116	7.37	7.56	3	0	1.42497e+06	749506	1.31126e+06	1.67131e+06	1.4975e+06	1.10122e+06
Q59EQ1	#N/A	Cadherin 11, type 2 isoform 1 preproprotein variant (Fragment) OS=Homo sapiens OX=9606 PE=2 SV=1	3	2	3	2	1	798	88.1	4.93	7.54	2	0	NA	1.81405e+06	578968	208067	707793	NA
A0A140VJW2	#N/A	Stathmin OS=Homo sapiens OX=9606 PE=2 SV=1	13	2	3	2	1	174	19.8	7.02	7.54	2	0	3.1439e+06	6.11898e+06	2.72589e+06	3.30345e+06	7.01187e+06	4.06043e+06
E3WH17	SQSTM1-ALK	Tyrosine-protein kinase receptor OS=Homo sapiens OX=9606 GN=SQSTM1-ALK PE=2 SV=1	5	2	2	2	1	814	89.9	7.55	7.51	2	0	NA	1.08299e+06	NA	892606	1.0824e+06	447028
A0A024RDJ4	NFKB1	Nuclear factor of kappa light polypeptide gene enhancer in B-cells 1 (P105), isoform CRA_b OS=Homo sapiens OX=9606 GN=NFKB1 PE=4 SV=1	3	2	3	2	1	968	105.3	5.4	7.48	2	0	1.60647e+06	645608	762092	1.01425e+06	NA	NA
Q9NVI7	ATAD3A	ATPase family AAA domain-containing protein 3A OS=Homo sapiens OX=9606 GN=ATAD3A PE=1 SV=2	4	3	3	3	1	634	71.3	8.98	7.45	3	0	295676	3.52784e+06	404971	1.54195e+06	1.14626e+06	1.76058e+06
P49593	PPM1F	Protein phosphatase 1F OS=Homo sapiens OX=9606 GN=PPM1F PE=1 SV=3	8	2	2	2	1	454	49.8	5.1	7.43	2	0	NA	NA	NA	NA	NA	NA
P61960	UFM1	Ubiquitin-fold modifier 1 OS=Homo sapiens OX=9606 GN=UFM1 PE=1 SV=1	27	2	3	2	1	85	9.1	9.31	7.43	2	0	548754	6.81672e+06	1.77164e+06	1.56328e+06	3.19518e+06	1.77716e+06
A0A0S2Z4T1	MCM3	DNA helicase (Fragment) OS=Homo sapiens OX=9606 GN=MCM3 PE=2 SV=1	4	3	3	3	1	808	90.9	5.77	7.4	3	0	804475	1.67473e+06	NA	332251	NA	NA
A0A2X0SFD3	DOCK2	DOCK2 (Fragment) OS=Homo sapiens OX=9606 GN=DOCK2 PE=3 SV=1	1	2	3	2	1	1832	212	6.87	7.4	2	0	1.73089e+06	NA	617840	1.17814e+06	NA	779524
Q9P2B2	PTGFRN	Prostaglandin F2 receptor negative regulator OS=Homo sapiens OX=9606 GN=PTGFRN PE=1 SV=2	2	2	3	2	1	879	98.5	6.61	7.39	2	0	NA	428609	1.3183e+06	1.32413e+06	2.91589e+06	2.30872e+06
P49720	PSMB3	Proteasome subunit beta type-3 OS=Homo sapiens OX=9606 GN=PSMB3 PE=1 SV=2	17	2	2	2	1	205	22.9	6.55	7.38	2	0	458612	2.1723e+06	292386	757547	407292	434440
B4DRM3	#N/A	cDNA FLJ54492, highly similar to Eukaryotic translation initiation factor 4B OS=Homo sapiens OX=9606 PE=2 SV=1	3	2	3	2	1	616	69.7	5.67	7.33	2	0	1.28506e+06	2.67257e+06	145646	145226	444400	251404
O00499	BIN1	Myc box-dependent-interacting protein 1 OS=Homo sapiens OX=9606 GN=BIN1 PE=1 SV=1	5	2	2	2	1	593	64.7	5.06	7.33	2	0	NA	NA	NA	NA	NA	NA
Q53GR7	#N/A	Solute carrier family 25, member 13 (Citrin) variant (Fragment) OS=Homo sapiens OX=9606 PE=2 SV=1	5	2	2	2	1	675	74.1	8.38	7.32	2	0	5.50641e+06	1.23995e+06	4.66453e+06	NA	NA	4.83813e+06
Q9UGM5	FETUB	Fetuin-B OS=Homo sapiens OX=9606 GN=FETUB PE=1 SV=2	5	2	3	2	1	382	42	6.83	7.28	2	0	480307	NA	1.15707e+06	3.6291e+06	NA	201619
B4E290	#N/A	cDNA FLJ50039, highly similar to Homo sapiens solute carrier family 25, member 24, transcript variant 1, mRNA OS=Homo sapiens OX=9606 PE=2 SV=1	4	2	3	2	1	477	53.3	6.61	7.26	2	0	1.20584e+06	2.0448e+06	868034	2.76155e+06	NA	1.48542e+06
P49458	SRP9	Signal recognition particle 9 kDa protein OS=Homo sapiens OX=9606 GN=SRP9 PE=1 SV=2	22	2	3	2	1	86	10.1	7.97	7.25	2	0	1.07165e+06	6.87358e+06	998898	1.68226e+06	2.29637e+06	1.41236e+06
A0A384MDS4	hCG_18987	Epididymis secretory sperm binding protein OS=Homo sapiens OX=9606 GN=hCG_18987 PE=2 SV=1	5	2	2	2	1	447	49.8	9.44	7.23	2	0	NA	1.81332e+06	NA	NA	NA	NA
Q9UHQ9	CYB5R1	NADH-cytochrome b5 reductase 1 OS=Homo sapiens OX=9606 GN=CYB5R1 PE=1 SV=1	9	3	3	3	1	305	34.1	9.38	7.22	3	0	1.18344e+06	3.61126e+06	1.23328e+06	1.87062e+06	2.01481e+06	2.05294e+06
Q13363	CTBP1	C-terminal-binding protein 1 OS=Homo sapiens OX=9606 GN=CTBP1 PE=1 SV=2	6	2	2	2	1	440	47.5	6.77	7.19	2	0	477289	1.60373e+06	719341	289223	1.59707e+06	794050
Q6UVK1	CSPG4	Chondroitin sulfate proteoglycan 4 OS=Homo sapiens OX=9606 GN=CSPG4 PE=1 SV=2	1	2	3	2	1	2322	250.4	5.47	7.18	2	0	299574	2.56777e+06	NA	511052	393815	708746
P27694	RPA1	Replication protein A 70 kDa DNA-binding subunit OS=Homo sapiens OX=9606 GN=RPA1 PE=1 SV=2	3	2	4	2	1	616	68.1	7.21	7.09	2	0	NA	1.21545e+06	523632	638388	798907	1.12239e+06
B2RDJ6	CIAO1	Probable cytosolic iron-sulfur protein assembly protein CIAO1 OS=Homo sapiens OX=9606 GN=CIAO1 PE=2 SV=1	10	2	2	2	1	339	37.8	4.97	7.03	2	0	NA	1.06851e+06	827824	456887	2.23411e+06	NA
B4DLJ5	#N/A	cDNA FLJ55716, highly similar to Desmocollin-2 OS=Homo sapiens OX=9606 PE=2 SV=1	3	2	2	2	1	912	101	5.27	7.01	2	0	NA	NA	NA	NA	NA	NA
A0A024R3C4	KDELC2	KDEL (Lys-Asp-Glu-Leu) containing 2, isoform CRA_a OS=Homo sapiens OX=9606 GN=KDELC2 PE=4 SV=1	6	2	2	2	1	507	58.5	8.24	6.95	2	0	27513.1	697234	41530.4	72097.4	113453	97229
P13686	ACP5	Tartrate-resistant acid phosphatase type 5 OS=Homo sapiens OX=9606 GN=ACP5 PE=1 SV=3	10	2	2	2	1	325	36.6	8.7	6.91	2	0	NA	3.17431e+06	NA	NA	NA	NA
Q14005	IL16	Pro-interleukin-16 OS=Homo sapiens OX=9606 GN=IL16 PE=1 SV=4	3	2	2	2	1	1332	141.7	8.06	6.91	2	0	NA	NA	NA	NA	NA	NA
Q9UNF0	PACSIN2	Protein kinase C and casein kinase substrate in neurons protein 2 OS=Homo sapiens OX=9606 GN=PACSIN2 PE=1 SV=2	6	3	3	3	1	486	55.7	5.2	6.87	3	0	3.28789e+06	3.35288e+06	3.91018e+06	4.37978e+06	2.54935e+06	3.1926e+06
A0A087WUM0	SYNJ2BP-COX16	SYNJ2BP-COX16 readthrough (Fragment) OS=Homo sapiens OX=9606 GN=SYNJ2BP-COX16 PE=4 SV=1	11	2	3	2	1	186	20.8	5.19	6.86	2	0	355300	2.37118e+06	NA	647797	4.99903e+06	823167
D3DQ70	SERBP1	SERPINE1 mRNA binding protein 1, isoform CRA_d OS=Homo sapiens OX=9606 GN=SERBP1 PE=4 SV=1	6	2	2	2	1	465	50.9	9.33	6.82	2	0	NA	828919	NA	NA	NA	NA
A0A3B3IUB5	HM13	Minor histocompatibility antigen H13 OS=Homo sapiens OX=9606 GN=HM13 PE=4 SV=1	9	2	2	2	1	420	46.3	8.03	6.82	2	0	417107	4.1974e+06	NA	652363	579829	1.11662e+06
A0A024R5K1	CORO1B	Coronin OS=Homo sapiens OX=9606 GN=CORO1B PE=3 SV=1	5	2	2	2	1	489	54.2	5.88	6.79	2	0	NA	3.92946e+06	NA	646076	2.0093e+06	NA
A0A0S2Z4Z0	RBM14	RNA binding motif protein 14 isoform 1 (Fragment) OS=Homo sapiens OX=9606 GN=RBM14 PE=2 SV=1	5	3	3	3	1	669	69.4	9.67	6.78	3	0	1.03326e+06	2.80784e+06	NA	1.1758e+06	1.28444e+06	1.76543e+06
A0A140VJK2	#N/A	Glycerol-3-phosphate dehydrogenase OS=Homo sapiens OX=9606 PE=2 SV=1	3	2	3	2	1	727	80.8	7.53	6.77	2	0	841803	680149	772611	2.0858e+06	3.03812e+06	1.21442e+06
A0A024R3J1	TRIM29	Tripartite motif-containing 29, isoform CRA_a OS=Homo sapiens OX=9606 GN=TRIM29 PE=4 SV=1	5	3	3	3	1	588	65.8	7.15	6.72	3	0	NA	NA	NA	NA	383150	4.62244e+06
Q6NUL7	SPTLC1	SPTLC1 protein OS=Homo sapiens OX=9606 GN=SPTLC1 PE=2 SV=1	5	2	2	2	1	513	57.4	7.46	6.72	2	0	NA	410147	733545	NA	1.70984e+06	783644
O75306	NDUFS2	NADH dehydrogenase [ubiquinone] iron-sulfur protein 2, mitochondrial OS=Homo sapiens OX=9606 GN=NDUFS2 PE=1 SV=2	6	2	2	2	1	463	52.5	7.55	6.71	2	0	789915	1.13748e+06	906060	763158	923358	1.63324e+06
E9PQY2	PFDN4	Prefoldin subunit 4 OS=Homo sapiens OX=9606 GN=PFDN4 PE=1 SV=1	20	2	2	2	1	136	15.6	4.58	6.71	2	0	225453	1.06542e+06	NA	NA	1.16717e+06	266033
Q53F55	#N/A	Deoxythymidylate kinase (Thymidylate kinase) variant (Fragment) OS=Homo sapiens OX=9606 PE=2 SV=1	8	2	3	2	1	212	23.7	8.56	6.66	2	0	586441	2.84292e+06	252828	1.49605e+06	1.1908e+06	1.1299e+06
Q9UJ68	MSRA	Mitochondrial peptide methionine sulfoxide reductase OS=Homo sapiens OX=9606 GN=MSRA PE=1 SV=1	15	2	2	2	1	235	26.1	8.09	6.64	2	0	523250	297078	NA	634308	805528	NA
Q8NBX0	SCCPDH	Saccharopine dehydrogenase-like oxidoreductase OS=Homo sapiens OX=9606 GN=SCCPDH PE=1 SV=1	6	2	2	2	1	429	47.1	9.14	6.64	2	0	531442	2.82645e+06	736800	1.17897e+06	1.77908e+06	829345
A0A075B6H9	IGLV4-69	Immunoglobulin lambda variable 4-69 OS=Homo sapiens OX=9606 GN=IGLV4-69 PE=1 SV=1	36	2	3	2	1	119	12.8	6.51	6.62	2	0	NA	NA	2.67964e+06	1.52999e+06	1.00716e+06	448162
Q9H2U2	PPA2	Inorganic pyrophosphatase 2, mitochondrial OS=Homo sapiens OX=9606 GN=PPA2 PE=1 SV=2	10	2	2	2	1	334	37.9	7.39	6.61	2	0	NA	NA	NA	NA	NA	NA
P20701	ITGAL	Integrin alpha-L OS=Homo sapiens OX=9606 GN=ITGAL PE=1 SV=3	3	2	2	2	1	1170	128.7	5.63	6.59	2	0	463653	NA	28505.1	355011	286048	139262
A8K8W7	#N/A	cDNA FLJ75224, highly similar to Homo sapiens lipase, hormone-sensitive (LIPE), mRNA OS=Homo sapiens OX=9606 PE=2 SV=1	2	2	2	2	1	1076	116.5	6.7	6.56	2	0	NA	NA	NA	NA	2.73576e+06	173840
A0A0R7FJH5	F12	Coagulation factor XII OS=Homo sapiens OX=9606 GN=F12 PE=3 SV=1	5	2	2	2	1	615	67.8	7.8	6.53	2	0	1.79909e+06	2.42444e+06	1.28671e+06	884596	NA	1.17139e+06
Q86Y34	ADGRG3	Adhesion G protein-coupled receptor G3 OS=Homo sapiens OX=9606 GN=ADGRG3 PE=1 SV=1	5	2	2	2	1	549	60.8	8.72	6.52	2	0	4.65346e+06	NA	NA	1.73416e+06	1.2923e+06	1.0587e+06
Q59EC0	#N/A	Adenosine deaminase, RNA-specific isoform ADAR-a variant (Fragment) OS=Homo sapiens OX=9606 PE=2 SV=1	2	2	3	2	1	1244	137.7	8.48	6.51	2	0	173890	162743	602942	397193	282656	177882
O75400	PRPF40A	Pre-mRNA-processing factor 40 homolog A OS=Homo sapiens OX=9606 GN=PRPF40A PE=1 SV=2	3	2	2	2	1	957	108.7	7.56	6.49	2	0	NA	1.49466e+06	NA	321729	NA	NA
Q53GD1	#N/A	Guanine nucleotide-binding protein subunit gamma (Fragment) OS=Homo sapiens OX=9606 PE=2 SV=1	26	2	2	2	1	72	8	8.97	6.48	2	0	NA	NA	NA	NA	NA	NA
Q13231	CHIT1	Chitotriosidase-1 OS=Homo sapiens OX=9606 GN=CHIT1 PE=1 SV=1	7	2	2	2	1	466	51.6	6.96	6.47	2	0	622800	NA	NA	NA	NA	NA
Q96HY6	DDRGK1	DDRGK domain-containing protein 1 OS=Homo sapiens OX=9606 GN=DDRGK1 PE=1 SV=2	10	2	2	2	1	314	35.6	5.12	6.44	2	0	667713	1.91777e+06	809262	748005	427543	500647
A0A0C4DG89	DDX46	Probable ATP-dependent RNA helicase DDX46 OS=Homo sapiens OX=9606 GN=DDX46 PE=1 SV=1	3	2	2	2	1	1032	117.4	9.29	6.41	2	0	NA	NA	NA	NA	NA	NA
Q9Y333	LSM2	U6 snRNA-associated Sm-like protein LSm2 OS=Homo sapiens OX=9606 GN=LSM2 PE=1 SV=1	28	2	2	2	1	95	10.8	6.52	6.39	2	0	NA	1.18815e+06	NA	322991	465061	NA
O00483	NDUFA4	Cytochrome c oxidase subunit NDUFA4 OS=Homo sapiens OX=9606 GN=NDUFA4 PE=1 SV=1	27	2	2	2	1	81	9.4	9.38	6.34	2	0	521933	6.11561e+06	599316	2.31848e+06	2.39988e+06	1.58783e+06
P12821	ACE	Angiotensin-converting enzyme OS=Homo sapiens OX=9606 GN=ACE PE=1 SV=1	2	2	2	2	1	1306	149.6	6.39	6.29	2	0	NA	693502	NA	NA	NA	NA
L0R6Q1	SLC35A4	SLC35A4 upstream open reading frame protein OS=Homo sapiens OX=9606 GN=SLC35A4 PE=3 SV=1	32	2	2	2	1	103	11.1	8.1	6.28	2	0	NA	244896	124260	NA	NA	NA
P38117	ETFB	Electron transfer flavoprotein subunit beta OS=Homo sapiens OX=9606 GN=ETFB PE=1 SV=3	8	2	3	2	1	255	27.8	8.1	6.2	2	0	1.08814e+06	2.83873e+06	1.12276e+06	2.74088e+06	2.96956e+06	1.31976e+06
Q96L92	SNX27	Sorting nexin-27 OS=Homo sapiens OX=9606 GN=SNX27 PE=1 SV=2	4	2	2	2	1	541	61.2	6.49	6.2	2	0	1.19747e+06	1.10172e+06	561424	868502	693045	774123
A8MWD9	SNRPGP15	Putative small nuclear ribonucleoprotein G-like protein 15 OS=Homo sapiens OX=9606 GN=SNRPGP15 PE=5 SV=2	17	2	2	2	1	76	8.5	8.84	6.17	2	0	NA	1.19611e+06	NA	NA	NA	NA
P11717	IGF2R	Cation-independent mannose-6-phosphate receptor OS=Homo sapiens OX=9606 GN=IGF2R PE=1 SV=3	1	2	2	2	1	2491	274.2	5.94	6.17	2	0	425568	654251	381947	NA	405818	696461
Q9Y680	FKBP7	Peptidyl-prolyl cis-trans isomerase FKBP7 OS=Homo sapiens OX=9606 GN=FKBP7 PE=1 SV=2	11	2	2	2	1	222	25.8	6.32	6.14	2	0	NA	6.73393e+06	418399	450703	720197	NA
Q32Q14	NDUFA7	NDUFA7 protein (Fragment) OS=Homo sapiens OX=9606 GN=NDUFA7 PE=2 SV=1	22	2	2	2	1	121	13.5	10.4	6.13	2	0	588371	2.35942e+06	438016	814945	2.18729e+06	660731
Q05315	CLC	Galectin-10 OS=Homo sapiens OX=9606 GN=CLC PE=1 SV=3	6	2	3	2	1	142	16.4	7.37	6.13	2	0	NA	1.6101e+07	309811	1.43726e+06	601296	213716
A0A024R3P9	ACBD3	Acyl-Coenzyme A binding domain containing 3, isoform CRA_a OS=Homo sapiens OX=9606 GN=ACBD3 PE=4 SV=1	5	2	2	2	1	528	60.6	5.06	6.1	2	0	NA	1.7662e+06	838655	562569	1.11194e+06	NA
F5GXJ1	NDUFS7	NADH dehydrogenase [ubiquinone] iron-sulfur protein 7, mitochondrial OS=Homo sapiens OX=9606 GN=NDUFS7 PE=1 SV=1	10	2	2	2	1	236	25.4	9.89	6.03	2	0	NA	1.77939e+06	566557	654289	641709	1.00845e+06
Q02978	SLC25A11	Mitochondrial 2-oxoglutarate/malate carrier protein OS=Homo sapiens OX=9606 GN=SLC25A11 PE=1 SV=3	8	2	2	2	1	314	34	9.91	6.02	2	0	226923	563384	189386	459284	NA	800891
P12004	PCNA	Proliferating cell nuclear antigen OS=Homo sapiens OX=9606 GN=PCNA PE=1 SV=1	7	2	3	2	1	261	28.8	4.69	6.02	2	0	425644	4.81386e+06	NA	NA	2.21112e+06	NA
Q6ZP37	#N/A	cDNA FLJ26554 fis, clone LNF01773, highly similar to Galactokinase OS=Homo sapiens OX=9606 PE=2 SV=1	6	2	2	2	1	396	42.9	7.24	6.01	2	0	356066	1.12163e+06	688048	1.15303e+06	1.25016e+06	498259
Q7Z4Y4	AK3	GTP:AMP phosphotransferase AK3, mitochondrial OS=Homo sapiens OX=9606 GN=AK3 PE=2 SV=1	11	2	2	2	1	227	25.6	9.31	6	2	0	531335	2.4706e+06	975505	1.4978e+06	3.73289e+06	2.93301e+06
Q9UBC2	EPS15L1	Epidermal growth factor receptor substrate 15-like 1 OS=Homo sapiens OX=9606 GN=EPS15L1 PE=1 SV=1	4	3	3	3	1	864	94.2	5.11	5.93	3	0	171433	233607	81997.2	NA	NA	390498
B4DPV7	#N/A	cDNA FLJ54534, highly similar to Homo sapiens cysteinyl-tRNA synthetase (CARS), transcript variant 3, mRNA OS=Homo sapiens OX=9606 PE=2 SV=1	5	2	2	2	1	809	92	7.08	5.87	2	0	NA	95620.8	6382.29	NA	NA	NA
A6NFX8	NUDT5	ADP-sugar pyrophosphatase OS=Homo sapiens OX=9606 GN=NUDT5 PE=1 SV=1	9	2	2	2	1	232	25.9	5.19	5.79	2	0	1.2859e+06	2.66979e+06	1.37311e+06	393530	3.36161e+06	567428
P31689	DNAJA1	DnaJ homolog subfamily A member 1 OS=Homo sapiens OX=9606 GN=DNAJA1 PE=1 SV=2	7	2	2	2	1	397	44.8	7.08	5.79	2	0	NA	1.25758e+06	108310	NA	NA	NA
Q16775	HAGH	Hydroxyacylglutathione hydrolase, mitochondrial OS=Homo sapiens OX=9606 GN=HAGH PE=1 SV=2	6	2	3	2	1	308	33.8	8.12	5.79	2	0	302445	450601	119823	374758	NA	NA
B4E0B1	#N/A	cDNA FLJ52100 OS=Homo sapiens OX=9606 PE=2 SV=1	3	2	2	2	1	891	100.9	8.27	5.77	2	0	NA	296509	NA	NA	NA	NA
Q8NC56	LEMD2	LEM domain-containing protein 2 OS=Homo sapiens OX=9606 GN=LEMD2 PE=1 SV=1	6	2	2	2	1	503	56.9	9	5.77	2	0	NA	954221	NA	NA	280570	NA
P50479	PDLIM4	PDZ and LIM domain protein 4 OS=Homo sapiens OX=9606 GN=PDLIM4 PE=1 SV=2	7	2	2	2	1	330	35.4	7.91	5.76	2	0	NA	3.50805e+06	1.44254e+06	NA	552030	NA
A0A024R498	SERPINE2	Serpin peptidase inhibitor, clade E (Nexin, plasminogen activator inhibitor type 1), member 2, isoform CRA_b OS=Homo sapiens OX=9606 GN=SERPINE2 PE=3 SV=1	6	2	2	2	1	397	44	9.38	5.75	2	0	NA	284751	NA	NA	3.26738e+06	NA
O15212	PFDN6	Prefoldin subunit 6 OS=Homo sapiens OX=9606 GN=PFDN6 PE=1 SV=1	16	2	3	2	1	129	14.6	8.88	5.75	2	0	212718	1.93068e+06	638052	487844	2.18339e+06	199112
P62316	SNRPD2	Small nuclear ribonucleoprotein Sm D2 OS=Homo sapiens OX=9606 GN=SNRPD2 PE=1 SV=1	24	2	2	2	1	118	13.5	9.91	5.71	2	0	123485	6.63422e+06	810782	621474	NA	NA
A8KAP9	#N/A	cDNA FLJ78448, highly similar to Homo sapiens argininosuccinate synthetase (ASS), transcript variant 1, mRNA OS=Homo sapiens OX=9606 PE=2 SV=1	7	2	2	2	1	412	46.5	8.03	5.7	2	0	NA	NA	NA	NA	1.02271e+06	NA
Q96KG9	SCYL1	N-terminal kinase-like protein OS=Homo sapiens OX=9606 GN=SCYL1 PE=1 SV=1	3	2	2	2	1	808	89.6	6.3	5.68	2	0	1.38528e+06	2.21655e+06	732378	915994	NA	NA
A8K132	#N/A	cDNA FLJ75476, highly similar to Homo sapiens glutaminase (GLS), mRNA OS=Homo sapiens OX=9606 PE=2 SV=1	5	2	2	2	1	669	73.5	7.77	5.67	2	0	NA	NA	NA	NA	NA	NA
E5KLL9	#N/A	Mitochondrial dynamin-like 120 kDa protein OS=Homo sapiens OX=9606 PE=3 SV=1	3	2	2	2	1	1015	117.7	7.77	5.64	2	0	NA	243188	124388	NA	308056	NA
Q6LEN0	PGIS	Prostacyclin synthase (Fragment) OS=Homo sapiens OX=9606 GN=PGIS PE=3 SV=1	5	2	2	2	1	509	57.8	7.31	5.62	2	0	NA	327674	NA	NA	1.72433e+06	270246
Q02413	DSG1	Desmoglein-1 OS=Homo sapiens OX=9606 GN=DSG1 PE=1 SV=2	2	2	2	2	1	1049	113.7	5.03	5.6	2	0	NA	NA	NA	NA	NA	1.31039e+06
A0A384NKJ3	#N/A	Epididymis secretory sperm binding protein OS=Homo sapiens OX=9606 PE=2 SV=1	9	2	2	2	1	302	32.8	8.54	5.57	2	0	159298	721361	NA	NA	NA	171613
O00487	PSMD14	26S proteasome non-ATPase regulatory subunit 14 OS=Homo sapiens OX=9606 GN=PSMD14 PE=1 SV=1	6	2	2	2	1	310	34.6	6.52	5.55	2	0	NA	3.69712e+06	189983	1402734	1.50651e+06	NA
P09543	CNP	2',3'-cyclic-nucleotide 3'-phosphodiesterase OS=Homo sapiens OX=9606 GN=CNP PE=1 SV=2	5	2	2	2	1	421	47.5	9.07	5.54	2	0	NA	1.37796e+06	168138	278788	1.73049e+06	NA
Q9NPJ3	ACOT13	Acyl-coenzyme A thioesterase 13 OS=Homo sapiens OX=9606 GN=ACOT13 PE=1 SV=1	16	2	2	2	1	140	15	9.14	5.54	2	0	NA	1.08172e+06	NA	NA	NA	NA
A0A146E5L3	Meflin	Mesenchymal stromal cell-and fibroblast-expressing Linx paralogue OS=Homo sapiens OX=9606 GN=Meflin PE=2 SV=1	6	2	2	2	1	428	46	5.15	5.48	2	0	NA	1.88445e+06	NA	NA	892938	NA
Q8TD55	PLEKHO2	Pleckstrin homology domain-containing family O member 2 OS=Homo sapiens OX=9606 GN=PLEKHO2 PE=1 SV=1	5	2	2	2	1	490	53.3	5.43	5.44	2	0	1.7485e+06	1.54213e+06	1.49472e+06	2.99924e+06	3.90344e+06	3.12622e+06
A0A0X9SZU9	#N/A	MS-B1 heavy chain variable region (Fragment) OS=Homo sapiens OX=9606 PE=2 SV=1	16	2	2	2	1	128	14.2	8.87	5.42	2	0	56745.6	901344	1.29661e+06	1.12928e+06	NA	NA
Q08945	SSRP1	FACT complex subunit SSRP1 OS=Homo sapiens OX=9606 GN=SSRP1 PE=1 SV=1	3	2	2	2	1	709	81	6.87	5.42	2	0	NA	2.96957e+06	NA	787791	995896	787532
Q01813	PFKP	ATP-dependent 6-phosphofructokinase, platelet type OS=Homo sapiens OX=9606 GN=PFKP PE=1 SV=2	3	2	2	2	1	784	85.5	7.55	5.38	2	0	227560	839871	247043	321205	784524	527532
Q96EE3	SEH1L	Nucleoporin SEH1 OS=Homo sapiens OX=9606 GN=SEH1L PE=1 SV=3	9	2	2	2	1	360	39.6	8.09	5.36	2	0	NA	531137	449853	641396	653581	322222
Q13643	FHL3	Four and a half LIM domains protein 3 OS=Homo sapiens OX=9606 GN=FHL3 PE=1 SV=4	13	2	2	2	1	280	31.2	6.2	5.35	2	0	1.2086e+06	3.13006e+06	1.38008e+06	2.58882e+06	3.52095e+06	1.77048e+06
Q92614	MYO18A	Unconventional myosin-XVIIIa OS=Homo sapiens OX=9606 GN=MYO18A PE=1 SV=3	2	2	2	2	1	2054	233	6.3	5.34	2	0	767093	NA	NA	575904	908560	625136
B3KQ33	#N/A	cDNA FLJ32715 fis, clone TESTI2000784, highly similar to Importin-4 OS=Homo sapiens OX=9606 PE=2 SV=1	2	2	2	2	1	1081	118.7	4.96	5.33	2	0	10923.2	51279.8	NA	20816	NA	34319.5
O75964	ATP5MG	ATP synthase subunit g, mitochondrial OS=Homo sapiens OX=9606 GN=ATP5MG PE=1 SV=3	23	2	2	2	1	103	11.4	9.64	5.32	2	0	NA	3.87257e+06	NA	300299	1.085e+06	NA
A0A2X0SF61	ARHGAP4	ARHGAP4 (Fragment) OS=Homo sapiens OX=9606 GN=ARHGAP4 PE=4 SV=1	3	2	2	2	1	988	109.6	6.47	5.32	2	0	NA	NA	NA	NA	NA	NA
M0QYS1	RPL13A	60S ribosomal protein L13a (Fragment) OS=Homo sapiens OX=9606 GN=RPL13A PE=1 SV=2	7	2	3	2	1	210	24.2	10.86	5.31	2	0	NA	1.6911e+07	1.14763e+06	1.13746e+06	1.47375e+06	399929
Q13308	PTK7	Inactive tyrosine-protein kinase 7 OS=Homo sapiens OX=9606 GN=PTK7 PE=1 SV=2	2	2	2	2	1	1070	118.3	7.09	5.26	2	0	374929	2.21998e+06	1.1896e+06	914084	NA	NA
F8W031	#N/A	Uncharacterized protein (Fragment) OS=Homo sapiens OX=9606 PE=1 SV=1	10	2	2	2	1	263	29.2	7.01	5.24	2	0	601377	3.88511e+06	1.26553e+06	2.77822e+06	2.55128e+06	1.19754e+06
B2RAW0	#N/A	cDNA, FLJ95154, highly similar to Homo sapiens disabled homolog 2, mitogen-responsive phosphoprotein (Drosophila) (DAB2), mRNA OS=Homo sapiens OX=9606 PE=2 SV=1	4	2	2	2	1	770	82.4	5.53	5.24	2	0	98530.4	527449	74054.9	92800	NA	55022.6
Q08554	DSC1	Desmocollin-1 OS=Homo sapiens OX=9606 GN=DSC1 PE=1 SV=2	3	2	2	2	1	894	99.9	5.43	5.23	2	0	NA	NA	NA	NA	NA	1.95334e+06
A3KC71	okuribin	Nuclear envelope protein okuribin OS=Homo sapiens OX=9606 GN=okuribin PE=2 SV=1	2	2	2	2	1	950	108.1	9.72	5.22	2	0	NA	467379	11451	NA	154055	NA
O60687	SRPX2	Sushi repeat-containing protein SRPX2 OS=Homo sapiens OX=9606 GN=SRPX2 PE=1 SV=1	5	2	2	2	1	465	52.9	7.25	5.16	2	0	NA	963748	NA	318051	1.71734e+06	690955
Q99426	TBCB	Tubulin-folding cofactor B OS=Homo sapiens OX=9606 GN=TBCB PE=1 SV=2	8	2	2	2	1	244	27.3	5.15	5.15	2	0	NA	2.199e+06	NA	462903	NA	NA
B4DPQ3	#N/A	cDNA FLJ51034, highly similar to Vitamin K-dependent protein C OS=Homo sapiens OX=9606 PE=2 SV=1	5	2	2	2	1	517	57.4	7.53	5.15	2	0	121047	NA	NA	481023	NA	421710
Q92520	FAM3C	Protein FAM3C OS=Homo sapiens OX=9606 GN=FAM3C PE=1 SV=1	10	2	2	2	1	227	24.7	8.29	5.13	2	0	NA	1.55954e+06	528472	1138733	NA	547446
A6NHR9	SMCHD1	Structural maintenance of chromosomes flexible hinge domain-containing protein 1 OS=Homo sapiens OX=9606 GN=SMCHD1 PE=1 SV=2	2	3	3	3	1	2005	226.2	7.3	5.1	3	0	96152.1	NA	175491	165270	218155	75405.6
P49321	NASP	Nuclear autoantigenic sperm protein OS=Homo sapiens OX=9606 GN=NASP PE=1 SV=2	3	2	2	2	1	788	85.2	4.3	5.01	2	0	NA	2.74785e+06	NA	595130	1.84678e+06	841162
R4GMU1	H6PD	GDH/6PGL endoplasmic bifunctional protein OS=Homo sapiens OX=9606 GN=H6PD PE=1 SV=1	2	2	2	2	1	802	90.1	7.23	4.99	2	0	2.1498e+06	3.16528e+06	1.60263e+06	3.04184e+06	696515	1.77159e+06
A0A024R7L8	UPF1	UPF1 regulator of nonsense transcripts homolog (Yeast), isoform CRA_a OS=Homo sapiens OX=9606 GN=UPF1 PE=4 SV=1	2	2	2	2	1	1129	124.3	6.61	4.98	2	0	165702	600487	268766	580516	566431	145202
A0A2I6U1K5	#N/A	Electron transfer flavoprotein dehydrogenase OS=Homo sapiens OX=9606 PE=2 SV=1	5	2	2	2	1	617	68.4	7.68	4.98	2	0	221588	560830	197148	368546	NA	1.06524e+06
O75558	STX11	Syntaxin-11 OS=Homo sapiens OX=9606 GN=STX11 PE=1 SV=1	6	2	2	2	1	287	33.2	6.55	4.96	2	0	391721	NA	124803	499031	511045	507866
P17050	NAGA	Alpha-N-acetylgalactosaminidase OS=Homo sapiens OX=9606 GN=NAGA PE=1 SV=2	6	2	2	2	1	411	46.5	5.19	4.95	2	0	281216	571977	335658	301763	795289	NA
Q02880	TOP2B	DNA topoisomerase 2-beta OS=Homo sapiens OX=9606 GN=TOP2B PE=1 SV=3	1	2	2	2	1	1626	183.2	8	4.94	2	0	NA	1.27319e+06	118427	278563	NA	NA
P11117	ACP2	Lysosomal acid phosphatase OS=Homo sapiens OX=9606 GN=ACP2 PE=1 SV=3	5	2	2	2	1	423	48.3	6.74	4.89	2	0	259169	482067	238243	287864	267855	360181
E7EPT4	NDUFV2	NADH dehydrogenase [ubiquinone] flavoprotein 2, mitochondrial OS=Homo sapiens OX=9606 GN=NDUFV2 PE=1 SV=1	12	2	2	2	1	252	27.9	8	4.87	2	0	250185	1.11981e+06	41973.6	614980	1.70502e+06	219026
P02741	CRP	C-reactive protein OS=Homo sapiens OX=9606 GN=CRP PE=1 SV=1	9	2	2	2	1	224	25	5.63	4.83	2	0	2.3824e+06	NA	NA	796764	NA	NA
Q99442	SEC62	Translocation protein SEC62 OS=Homo sapiens OX=9606 GN=SEC62 PE=1 SV=1	5	2	2	2	1	399	45.8	7.12	4.82	2	0	NA	1.68463e+06	NA	NA	NA	NA
Q96B97	SH3KBP1	SH3 domain-containing kinase-binding protein 1 OS=Homo sapiens OX=9606 GN=SH3KBP1 PE=1 SV=2	3	2	2	2	1	665	73.1	6.62	4.75	2	0	3.00443e+06	444010	2.88589e+06	2.09435e+06	412707	2.65011e+06
Q6NUQ4	TMEM214	Transmembrane protein 214 OS=Homo sapiens OX=9606 GN=TMEM214 PE=1 SV=2	3	2	2	2	1	689	77.1	9.14	4.73	2	0	NA	2.1627e+06	159870	NA	NA	NA
Q7Z5L7	PODN	Podocan OS=Homo sapiens OX=9606 GN=PODN PE=1 SV=2	4	2	2	2	1	613	68.9	6.99	4.7	2	0	NA	216163	NA	NA	NA	NA
A0A024R5L0	PRCP	Prolylcarboxypeptidase (Angiotensinase C), isoform CRA_a OS=Homo sapiens OX=9606 GN=PRCP PE=4 SV=1	4	2	2	2	1	496	55.8	7.21	4.7	2	0	1.1602e+06	2.33081e+06	NA	864213	NA	109703
P04181	OAT	Ornithine aminotransferase, mitochondrial OS=Homo sapiens OX=9606 GN=OAT PE=1 SV=1	6	2	2	2	1	439	48.5	7.03	4.69	2	0	NA	1.02372e+06	NA	82356.2	NA	NA
Q9UKK3	PARP4	Poly [ADP-ribose] polymerase 4 OS=Homo sapiens OX=9606 GN=PARP4 PE=1 SV=3	2	2	2	2	1	1724	192.5	5.66	4.67	2	0	NA	NA	NA	NA	NA	NA
O95747	OXSR1	Serine/threonine-protein kinase OSR1 OS=Homo sapiens OX=9606 GN=OXSR1 PE=1 SV=1	4	2	2	2	1	527	58	6.43	4.61	2	0	NA	495123	NA	NA	NA	NA
Q8IXI1	RHOT2	Mitochondrial Rho GTPase 2 OS=Homo sapiens OX=9606 GN=RHOT2 PE=1 SV=2	3	2	2	2	1	618	68.1	5.86	4.61	2	0	NA	764956	NA	NA	NA	NA
Q6FGY1	HPCAL1	HPCAL1 protein OS=Homo sapiens OX=9606 GN=HPCAL1 PE=2 SV=1	10	2	2	2	1	193	22.3	5.35	4.61	2	0	663148	726073	NA	NA	NA	962193
V9HW87	HEL-S-299	Abhydrolase domain containing 14B, isoform CRA_a OS=Homo sapiens OX=9606 GN=HEL-S-299 PE=2 SV=1	10	2	2	2	1	210	22.3	6.4	4.56	2	0	NA	150920	NA	NA	NA	NA
O14602	EIF1AY	Eukaryotic translation initiation factor 1A, Y-chromosomal OS=Homo sapiens OX=9606 GN=EIF1AY PE=1 SV=4	15	2	2	2	1	144	16.4	5.24	4.52	2	0	NA	1.78005e+06	NA	549821	NA	NA
E7ENX8	#N/A	Uncharacterized protein (Fragment) OS=Homo sapiens OX=9606 PE=3 SV=1	2	2	2	2	1	843	92.9	7.24	4.45	2	0	172044	1.66904e+06	202418	672772	NA	NA
Q9C0E8	LNPK	Endoplasmic reticulum junction formation protein lunapark OS=Homo sapiens OX=9606 GN=LNPK PE=1 SV=2	5	2	2	2	1	428	47.7	5.11	4.4	2	0	NA	634166	NA	268836	521722	400507
Q9UKG1	APPL1	DCC-interacting protein 13-alpha OS=Homo sapiens OX=9606 GN=APPL1 PE=1 SV=1	3	2	2	2	1	709	79.6	5.41	4.33	2	0	NA	NA	NA	NA	NA	NA
B2R7N9	#N/A	cDNA, FLJ93532, highly similar to Homo sapiens osteomodulin (OMD), mRNA OS=Homo sapiens OX=9606 PE=2 SV=1	4	2	2	2	1	421	49.4	5.52	4.28	2	0	NA	1.29494e+06	330168	260409	NA	306785
Q9H857	NT5DC2	5'-nucleotidase domain-containing protein 2 OS=Homo sapiens OX=9606 GN=NT5DC2 PE=1 SV=1	5	2	2	2	1	520	60.7	6.77	4.24	2	0	79508.1	588727	20534.8	19550.2	NA	156029
B2R8B5	#N/A	cDNA, FLJ93820, highly similar to Homo sapiens vav 1 oncogene (VAV1), mRNA OS=Homo sapiens OX=9606 PE=2 SV=1	3	2	2	2	1	845	98.1	6.55	4.19	2	0	7.95407e+06	771551	8.13057e+06	3.02071e+06	NA	2.59266e+06
A0A024R7D2	SLC44A2	Solute carrier family 44, member 2, isoform CRA_a OS=Homo sapiens OX=9606 GN=SLC44A2 PE=3 SV=1	4	3	3	3	1	706	80.1	8.62	4.14	3	0	4.25871e+06	843293	379360	587825	547802	1.20708e+06
Q9UK45	LSM7	U6 snRNA-associated Sm-like protein LSm7 OS=Homo sapiens OX=9606 GN=LSM7 PE=1 SV=1	16	2	2	2	1	103	11.6	5.27	4.05	2	0	NA	3.13682e+06	619758	1.255e+06	1.34219e+06	NA
Q9Y3C8	UFC1	Ubiquitin-fold modifier-conjugating enzyme 1 OS=Homo sapiens OX=9606 GN=UFC1 PE=1 SV=3	11	2	2	2	1	167	19.4	7.4	4.02	2	0	682990	448558	530679	784240	439209	521642
Q16512	PKN1	Serine/threonine-protein kinase N1 OS=Homo sapiens OX=9606 GN=PKN1 PE=1 SV=2	2	2	2	2	1	942	103.9	6.37	4.02	2	0	NA	144321	NA	222162	NA	NA
A0A0A0MQX8	MBNL1	Muscleblind-like protein 1 OS=Homo sapiens OX=9606 GN=MBNL1 PE=1 SV=1	4	2	2	2	1	400	43	8.82	3.98	2	0	200941	3.94176e+06	355409	1.18812e+06	1.00257e+06	1.2926e+06
O15371	EIF3D	Eukaryotic translation initiation factor 3 subunit D OS=Homo sapiens OX=9606 GN=EIF3D PE=1 SV=1	3	2	3	2	1	548	63.9	6.05	3.93	2	0	827280	3.42876e+06	951665	1.51463e+06	1.21e+06	2.14508e+06
A0A024QZD5	SNRP70	Small nuclear ribonucleoprotein 70kDa polypeptide (RNP antigen), isoform CRA_b OS=Homo sapiens OX=9606 GN=SNRP70 PE=4 SV=1	5	2	2	2	1	437	51.5	9.94	3.92	2	0	204584	2.40068e+06	512423	246785	1.3918e+06	626272
O60884	DNAJA2	DnaJ homolog subfamily A member 2 OS=Homo sapiens OX=9606 GN=DNAJA2 PE=1 SV=1	4	2	2	2	1	412	45.7	6.48	3.92	2	0	1.16533e+06	1.55266e+06	206202	728906	NA	226972
Q4V9L6	TMEM119	Transmembrane protein 119 OS=Homo sapiens OX=9606 GN=TMEM119 PE=1 SV=1	13	2	2	2	1	283	29.2	4.58	3.81	2	0	NA	1.04605e+06	NA	NA	728663	NA
A0MNN4	SMU1	CDW3/SMU1 OS=Homo sapiens OX=9606 GN=SMU1 PE=2 SV=1	4	2	2	2	1	513	57.5	7.18	3.39	2	0	NA	NA	NA	NA	NA	NA
A8K5K5	EIF3G	Eukaryotic translation initiation factor 3 subunit G OS=Homo sapiens OX=9606 GN=EIF3G PE=2 SV=1	7	2	2	2	1	320	35.6	6.13	2.82	2	0	276398	1.92113e+06	157630	879208	1.91875e+06	927524
N/A, not applicable; AA, protein sequence length; PSMs, Peptide Spectrum Matches; MW, molecular weight.
